# Supplementary material for: Bacterial diet affects the age-dependent decline of associative learning in Caenorhabditis elegans
Source: eLife. 2023 May 30;12:e81418. doi: 10.7554/eLife.81418 (PMC10229132; doi:10.7554/eLife.81418)
Supplement: Figure 1—figure supplement 1—source data 1. [file elife-81418-fig1-figsupp1-data1.xlsx]

## Sheet: Fig1-S1
Source data for Figure 1-Figure supplement 1
1=Dead, 0=Censored
Days of adulthood	17C	20C	23C
3	0
3	0
4	1
6	1
6	1
7	1
9	1
13	1
15	1
15	1
15	1
17	1
18	1
21	1
21	1
21	1
22	1
23	1
24	1
25	1
25	1
25	1
26	1
26	1
27	1
12		1
13		1
13		1
13		1
14		1
14		1
15		1
15		1
15		1
16		1
16		1
17		1
17		1
20		1
20		1
20		1
20		1
20		1
21		1
21		1
21		1
22		1
22		1
22		1
24		1
2			1
2			0
3			0
4			1
5			0
7			1
8			1
9			1
9			1
10			1
10			1
10			1
10			1
10			1
10			1
11			1
12			1
12			1
13			1
15			1
15			1
16			1
16			1
19			1
22			1
6	0
8	0
10	0
13	1
15	1
17	1
17	1
19	1
20	1
21	1
22	1
22	1
22	1
22	1
23	1
24	1
24	1
25	1
25	1
25	1
26	1
26	1
27	1
27	1
27	1
6		0
8		0
8		0
10		1
12		1
13		1
14		1
14		1
15		1
17		1
18		1
18		1
18		1
19		1
19		1
20		1
20		1
21		1
21		1
21		1
21		1
22		1
24		1
24		1
24		1
6			1
6			1
8			1
8			0
9			1
9			1
9			1
9			1
9			1
10			1
10			1
10			1
11			1
11			1
11			1
13			1
14			1
15			1
17			1
19			1
19			1
19			1
20			1
20			1
21			1
5	0
5	0
5	0
5	0
5	0
5	0
5	0
9	0
11	0
11	0
14	1
15	1
16	1
21	1
22	1
22	1
22	1
23	1
23	1
23	1
24	1
24	1
25	1
26	1
27	1
6		0
10		1
12		1
12		1
13		1
14		1
14		1
14		1
14		1
16		1
16		1
18		1
20		1
20		1
20		1
21		1
22		1
22		1
23		1
24		1
25		1
25		1
26		1
27		1
27		1
2			0
4			1
6			0
8			1
8			1
8			1
9			1
9			1
10			1
10			1
10			1
10			1
10			1
10			1
15			1
15			1
15			1
16			1
16			1
16			1
16			1
17			1
22			1
22			1
23			1
3	0
5	0
8	1
15	1
16	1
19	1
19	1
20	1
22	1
22	1
22	1
22	1
23	1
23	1
23	1
24	1
24	1
24	1
25	1
25	1
27	1
28	1
28	1
28	1
31	1
2		0
5		1
6		1
7		0
9		1
11		1
11		0
12		1
12		1
12		1
13		1
14		1
14		1
14		1
14		1
15		1
15		0
16		1
18		1
18		1
19		1
20		1
22		1
23		1
24		1
2			0
2			1
6			0
6			0
7			0
7			1
7			1
8			1
8			1
9			1
9			1
9			1
9			1
11			1
11			1
11			1
12			1
14			1
15			1
16			1
16			1
18			1
19			1
22			1
26			1
