# Supplementary material for: Bacterial diet affects the age-dependent decline of associative learning in Caenorhabditis elegans
Source: eLife. 2023 May 30;12:e81418. doi: 10.7554/eLife.81418 (PMC10229132; doi:10.7554/eLife.81418)
Supplement: Figure 1—figure supplement 2—source data 1. [file elife-81418-fig1-figsupp2-data1.xlsx]

## Sheet: Fig1-S2
Source data for Figure 1-Figure supplement 2
Age	Section 1	Section 2	Section 3	Section 4	Section 5	Section 6	Section 7	Section 8
D1	0.04	0.05	0.12	0.09	0.08	0.08	0.13	0.42
D1	0.04	0.02	0.05	0.06	0.09	0.11	0.2	0.45
D1	0.03	0.04	0.02	0.06	0.08	0.14	0.21	0.44
D1	0	0	0	0.00840336	0.0252101	0.0588235	0.134454	0.773109
D1	0	0	0.00952381	0.00952381	0.047619	0.0571429	0.2	0.67619
D1	0	0.00666667	0.0133333	0.02	0.08	0.12	0.32	0.44
D1	0	0.00909091	0.0181818	0	0.0636364	0.0545455	0.145455	0.709091
D1	0	0	0.0352941	0.0352941	0.105882	0.141176	0.211765	0.470588
D1	0.0654206	0.0841121	0.0654206	0.0747664	0.140187	0.0747664	0.102804	0.392523
D1	0.04	0.09	0.03	0.03	0.03	0.03	0.09	0.64
D1	0.09	0.08	0.03	0.02	0.02	0.08	0.2	0.48
D1	0.09	0.06	0.05	0.02	0.06	0.11	0.14	0.48
D1	0	0	0	0.0266667	0.0133333	0.133333	0.186667	0.64
D1	0.00900901	0.036036	0.045045	0.0540541	0.0720721	0.117117	0.153153	0.513514
D1	0	0.0135135	0	0.0135135	0.027027	0.0810811	0.297297	0.567568
D1	0	0.0185185	0.0185185	0.0185185	0.0740741	0.0555556	0.0740741	0.740741
D1	0.0188679	0.0125786	0.0188679	0.0314465	0.081761	0.113208	0.301887	0.421384
D1	0.0465116	0.0620155	0.0620155	0.0697674	0.108527	0.217054	0.255814	0.178295
D1	0.0211268	0.0140845	0.028169	0.0352113	0.126761	0.105634	0.183099	0.485915
D1	0.0813953	0.116279	0.145349	0.0755814	0.127907	0.0813953	0.174419	0.197674
D1	0	0	0.00632911	0.0126582	0.0253165	0.0443038	0.139241	0.772152
D1	0.0693069	0.0247525	0.0346535	0.0445545	0.0346535	0.039604	0.113861	0.638614
D1	0	0	0	0	0.0202703	0.0337838	0.0878378	0.858108
D1	0	0.00454546	0	0.0136364	0.00909091	0.0272727	0.0954545	0.85
D1	0.0135135	0	0.0202703	0.0405405	0.0405405	0.0608108	0.22973	0.594595
D1	0.00666667	0.00666667	0.02	0.04	0.0933333	0.08	0.133333	0.62
D1	0.0151515	0.00757576	0.0378788	0.0378788	0.0151515	0.0530303	0.128788	0.704545
D1	0.0243902	0.0162602	0.0487805	0.0406504	0.0569106	0.0813008	0.170732	0.560976
D1	0.0526316	0.0921053	0.0657895	0.0855263	0.0723684	0.0986842	0.157895	0.375
D1	0.0274725	0.0164835	0.010989	0.032967	0.043956	0.0164835	0.0879121	0.763736
D1	0.212264	0.0754717	0.0330189	0.0141509	0.0896226	0.113208	0.136792	0.325472
D1	0.03125	0.0104167	0.0104167	0.0729167	0.0104167	0.0520833	0.0520833	0.760417
D1	0.0333333	0.0533333	0.0266667	0.08	0.0866667	0.0266667	0.0733333	0.62
D1	0.0522876	0.0130719	0.0261438	0.0588235	0.0457516	0.150327	0.117647	0.535948
D1	0.025	0.0125	0.025	0.0375	0.075	0.0375	0.075	0.7125
D1	0.078534	0.078534	0.0994764	0.0575916	0.052356	0.0994764	0.172775	0.361257
D1	0.106796	0.0647249	0.0582524	0.0420712	0.0614887	0.0809061	0.194175	0.391586
D1	0.037037	0.0555556	0.0277778	0.0555556	0.0740741	0.152778	0.240741	0.356481
D1	0	0.0243902	0.0243902	0.0121951	0.0243902	0.0243902	0.243902	0.646341
D1	0	0.0178571	0.0178571	0	0.0535714	0.0892857	0.464286	0.357143
D1	0.0135135	0	0.027027	0	0.0540541	0.175676	0.175676	0.554054
D1	0.0967742	0.0645161	0	0.0645161	0.0322581	0.0483871	0.0967742	0.596774
D1	0.0153846	0.0153846	0.0307692	0.0461538	0.107692	0.0615385	0.215385	0.507692
D1	0.0078125	0	0.0078125	0.0078125	0.0234375	0.015625	0.0234375	0.914062
D1	0	0	0	0.0102041	0.0102041	0.102041	0.132653	0.744898
D1	0.0977444	0.0300752	0.0601504	0.0300752	0.0300752	0.0902256	0.225564	0.43609
D2	0.0175439	0.0350877	0	0.0526316	0.0175439	0.157895	0.210526	0.508772
D2	0.032	0.024	0.048	0.064	0.088	0.144	0.152	0.448
D2	0.0238095	0.047619	0.107143	0.0595238	0.0595238	0.0952381	0.154762	0.452381
D2	0.182927	0.146341	0.146341	0.109756	0.097561	0.0243902	0.109756	0.182927
D2	0.108434	0.0361446	0.0963855	0.060241	0.0240964	0.120482	0.13253	0.421687
D2	0	0.00884956	0.0176991	0.0265487	0.0442478	0.0176991	0.0442478	0.840708
D2	0.0444444	0.0222222	0.0666667	0.140741	0.0888889	0.177778	0.214815	0.244444
D2	0	0.0277778	0.0277778	0.0416667	0.0277778	0.111111	0.166667	0.597222
D3	0.0273224	0.0327869	0.0327869	0.0765027	0.0491803	0.153005	0.185792	0.442623
D3	0.0325203	0.00813008	0.105691	0.121951	0.211382	0.252033	0.195122	0.0731707
D3	0.04	0.02	0.1	0.065	0.1	0.145	0.155	0.375
D3	0.0378378	0.0540541	0.0810811	0.102703	0.145946	0.2	0.210811	0.167568
D3	0	0.0247934	0.0247934	0.107438	0.14876	0.0909091	0.198347	0.404959
D3	0	0	0	0.0384615	0.0512821	0.0897436	0.141026	0.679487
D3	0.0363636	0.0363636	0.00909091	0.127273	0.0727273	0.109091	0.154545	0.454545
D3	0.0288462	0.0480769	0.0673077	0.0961538	0.221154	0.125	0.144231	0.269231
D3	0.0952381	0.031746	0.047619	0.111111	0.206349	0.0952381	0.15873	0.253968
D3	0.0420168	0.0168067	0.0504202	0.0672269	0.0840336	0.0672269	0.0756303	0.596639
D3	0.0375	0.025	0.05	0.075	0.1125	0.1625	0.15	0.3875
D3	0.0125786	0.00628931	0.0251572	0.0628931	0.0440252	0.0628931	0.0943396	0.691824
D4	0	0	0.0150376	0.105263	0.240602	0.263158	0.142857	0.233083
D4	0	0	0.00746269	0.119403	0.261194	0.223881	0.156716	0.231343
D4	0	0.00699301	0.00699301	0.0839161	0.125874	0.132867	0.251748	0.391608
D4	0.00653595	0.00653595	0.0261438	0.0718954	0.117647	0.176471	0.176471	0.418301
D4	0.0289017	0.0115607	0.0635838	0.184971	0.260116	0.115607	0.150289	0.184971
D4	0.0314961	0.00787402	0.0708661	0.133858	0.212598	0.204724	0.165354	0.173228
D4	0	0	0.0215827	0.280576	0.251799	0.136691	0.151079	0.158273
D4	0	0	0.0620155	0.124031	0.147287	0.209302	0.147287	0.310078
D4	0	0.00934579	0.00934579	0.11215	0.214953	0.168224	0.17757	0.308411
D4	0	0.0163934	0.0163934	0.0327869	0.147541	0.0983607	0.180328	0.508197
D4	0.0410959	0.0273973	0.0410959	0.0684932	0.0958904	0.0821918	0.123288	0.520548
D4	0.0175439	0.0438596	0.00877193	0.131579	0.0964912	0.192982	0.114035	0.394737
D4	0.0103093	0.0206186	0.0721649	0.0721649	0.185567	0.134021	0.0824742	0.42268
D4	0.0103627	0.015544	0.00518135	0.0829016	0.11399	0.19171	0.145078	0.435233
D4	0	0.00641026	0.025641	0.0961538	0.128205	0.115385	0.166667	0.461538
D5	0.06	0.04	0.07	0.29	0.35	0.07	0.07	0.04
D5	0.01	0.03	0.03	0.26	0.31	0.13	0.12	0.12
D5	0.04	0.03	0.04	0.31	0.22	0.1	0.11	0.15
D5	0.00657895	0.00657895	0.0789474	0.236842	0.322368	0.203947	0.0592105	0.0855263
D5	0.00598802	0.0299401	0.0598802	0.299401	0.359281	0.143713	0.0479042	0.0538922
D5	0.0245399	0.0184049	0.0613497	0.202454	0.251534	0.239264	0.0858896	0.116564
D5	0	0.0106952	0.0427807	0.278075	0.294118	0.203209	0.101604	0.0695187
D5	0.01	0.01	0.05	0.34	0.33	0.12	0.1	0.05
D5	0	0.01	0.05	0.35	0.37	0.09	0.07	0.05
D5	0	0	0.03	0.46	0.33	0.06	0.04	0.08
D5	0	0.02	0.06	0.41	0.36	0.07	0.05	0.04
D5	0	0.00662252	0.0463576	0.165563	0.211921	0.0927152	0.139073	0.337748
D5	0.0229008	0.00763359	0.0458015	0.10687	0.229008	0.0992366	0.183206	0.305344
D5	0.0106383	0.0106383	0.0957447	0.138298	0.148936	0.202128	0.234043	0.159574
D5	0.0101523	0.0101523	0.0558376	0.116751	0.182741	0.172589	0.167513	0.284264
D5	0.0136054	0.0136054	0.0272109	0.129252	0.204082	0.231293	0.122449	0.258503
D5	0	0.0190476	0.0190476	0.0761905	0.12381	0.238095	0.142857	0.380952
D5	0.0078125	0.0078125	0.0390625	0.195312	0.320312	0.210938	0.15625	0.0625
D5	0.0232558	0.0174419	0.0523256	0.156977	0.244186	0.22093	0.180233	0.104651
D5	0.0145631	0.0194175	0.11165	0.339806	0.286408	0.140777	0.0533981	0.0339806
D5	0.0218978	0.00729927	0.10219	0.218978	0.277372	0.19708	0.116788	0.0583942
D5	0	0	0.0340136	0.22449	0.326531	0.156463	0.102041	0.156463
D5	0.00490196	0.0147059	0.0441176	0.245098	0.308824	0.127451	0.0686275	0.186275
D5	0	0.00714286	0.05	0.235714	0.385714	0.157143	0.05	0.114286
D5	0	0.0120482	0.0481928	0.156627	0.361446	0.144578	0.144578	0.13253
D5	0	0	0.0322581	0.322581	0.225806	0.209677	0.0967742	0.112903
D5	0.0393701	0.023622	0.0787402	0.314961	0.275591	0.0866142	0.0944882	0.0866142
D5	0.0189573	0.028436	0.0663507	0.317536	0.222749	0.113744	0.0663507	0.165877
D5	0	0	0.0444444	0.111111	0.222222	0.111111	0.111111	0.4
D5	0	0	0.0416667	0.333333	0.222222	0.0972222	0.0833333	0.222222
D5	0	0.0121951	0.0365854	0.207317	0.195122	0.097561	0.207317	0.243902
