# Supplementary material for: Bacterial diet affects the age-dependent decline of associative learning in Caenorhabditis elegans
Source: eLife. 2023 May 30;12:e81418. doi: 10.7554/eLife.81418 (PMC10229132; doi:10.7554/eLife.81418)
Supplement: Figure 1—figure supplement 3—source data 1. [file elife-81418-fig1-figsupp3-data1.xlsx]

## Sheet: Fig1-S3
Source data for Figure 1-Figure supplement 3
Condition	Performance_index
D1	0.767241
D1	0.84058
D1	0.718447
D1	0.64486
D1	0.822581
D1	0.745902
D1	0.715447
D1	0.708333
D5_E.coli_OP50	0.238095
D5_E.coli_OP50	0.254386
D5_E.coli_OP50	0.368421
D5_E.coli_OP50	0.326923
D5_E.coli_OP50	0.202128
D5_E.coli_OP50	0.0655738
D5_E.coli_OP50	0.264463
D5_E.coli_OP50	0.171875
D5_E.coli_HT115	0.22973
D5_E.coli_HT115	0.191304
D5_E.coli_HT115	0.483516
D5_E.coli_HT115	0.365854
D5_E.coli_HT115	0.113208
D5_E.coli_HT115	0.381356
D5_E.coli_HT115	0.271429
D5_E.coli_HT115	0.285714
