# Supplementary material for: Bacterial diet affects the age-dependent decline of associative learning in Caenorhabditis elegans
Source: eLife. 2023 May 30;12:e81418. doi: 10.7554/eLife.81418 (PMC10229132; doi:10.7554/eLife.81418)
Supplement: Figure 1—figure supplement 5—source data 1. [file elife-81418-fig1-figsupp5-data1.xlsx]

## Sheet: Fig1-S5
Source data for Figure 1-Figure supplement 5A and 5B
D1					D5
Well-fed	Well-fed	Food-deprived	Food-deprived		Well-fed	Well-fed	Food-deprived	Food-deprived
None	E.coli	None	E.coli		None	E.coli	None	E.coli
16	5	14	4		16	7	13	4
16	7	19	6		9	4	15	4
19	10	17	4		16	11	12	5
19	13	17	4		12	8	7	5
17	4	13	3		4	8	11	2
19	8	16	4		4	7	7	3
17	7	20	6		6	4	17	1
20	9	16	2		4	4	16	5
19	8	18	3		8	4	5	5
14	6	14	2		3	2	13	1
14	9	15	5		22	7	15	2
18	4	9	5		6	3	12	2
18	11	18	4		3	7	12	9
13	7	16	3		10	11	10	6
11	5	12	3		4	3	8	1
18	8	14	3		12	3	9	1
14	11	11	5		10	6	4	1
16	14	17	4		7	1	4	3
16	10	10	3		8	2	13	2
6	4	15	4		3	3	12	1
13	13	10	2		9	2	7	2
19	15	13	4		12	1	5	2
18	11	18	4		6	1	8	1
11	9	13	1		8	1	3	1
14	7	14	3		5	2	13	9
18	14	19	3
16	4	12	3
12	5	18	1
17	12	16	1
12	9	16	8
