# Supplementary material for: Bacterial diet affects the age-dependent decline of associative learning in Caenorhabditis elegans
Source: eLife. 2023 May 30;12:e81418. doi: 10.7554/eLife.81418 (PMC10229132; doi:10.7554/eLife.81418)
Supplement: Figure 1—figure supplement 6—source data 1. [file elife-81418-fig1-figsupp6-data1.xlsx]

## Sheet: Fig1-S6
Source data for Figure 1-Figure supplement 6C and 6D
Gradient assay			Quadrant assay
Condition	Chemotaxis index		Condition	Chemotaxis index
D1_E.coli_(naive)	0.876712		D1_E.coli_(naive)	0.752577
D1_E.coli_(naive)	0.758621		D1_E.coli_(naive)	0.286624
D1_E.coli_(naive)	0.957447		D1_E.coli_(naive)	0.527273
D1_E.coli_(naive)	0.813953		D1_E.coli_(naive)	-0.311258
D1_E.coli_(naive)	0.820408		D1_E.coli_(naive)	0.451923
D1_E.coli_(naive)	0.873626		D1_E.coli_(naive)	0.581395
D1_E.coli_(naive)	0.927481		D1_E.coli_(naive)	0.606695
D1_E.coli_(naive)	0.728625		D1_E.coli_(naive)	0.902703
D1_E.coli_(naive)	0.756863		D1_E.coli_(naive)	0.691429
D1_E.coli_(naive)	0.838384		D1_E.coli_(naive)	0.891892
D1_E.coli_(naive)	0.846975		D1_E.coli_(naive)	0.836735
D1_E.coli_(mock)	0.852174		D1_E.coli_(naive)	0.882353
D1_E.coli_(mock)	0.90625		D1_E.coli_(naive)	0.8
D1_E.coli_(mock)	0.839506		D1_E.coli_(naive)	0.81323
D1_E.coli_(mock)	0.908213		D1_E.coli_(mock)	0.560976
D1_E.coli_(mock)	0.91342		D1_E.coli_(mock)	0.721973
D1_E.coli_(mock)	0.883249		D1_E.coli_(mock)	0.795918
D1_E.coli_(mock)	0.903704		D1_E.coli_(mock)	0.647727
D1_E.coli_(mock)	0.874317		D1_E.coli_(mock)	0.913043
D1_E.coli_(mock)	0.803468		D1_E.coli_(mock)	0.804196
D1_E.coli_(mock)	0.829493		D1_E.coli_(mock)	0.977901
D1_E.coli_(mock)	0.972376		D1_E.coli_(mock)	0.865385
D1_E.coli_(mock)	0.945378		D1_E.coli_(mock)	0.914894
D1_E.coli_(mock)	0.943925		D1_E.coli_(mock)	0.925466
D1_E.coli_(mock)	0.978102		D1_E.coli_(mock)	0.797297
D1_E.coli_(NaCl)	0.269841		D1_E.coli_(mock)	0.921788
D1_E.coli_(NaCl)	-0.52381		D1_E.coli_(mock)	0.733333
D1_E.coli_(NaCl)	-0.205882		D1_E.coli_(mock)	0.87907
D1_E.coli_(NaCl)	0.105263		D1_E.coli_(NaCl)	-0.92
D1_E.coli_(NaCl)	0.697842		D1_E.coli_(NaCl)	-0.84058
D1_E.coli_(NaCl)	-0.45933		D1_E.coli_(NaCl)	-0.679558
D1_E.coli_(NaCl)	0.336842		D1_E.coli_(NaCl)	-0.711712
D1_E.coli_(NaCl)	0.363095		D1_E.coli_(NaCl)	-0.380435
D1_E.coli_(NaCl)	0.198864		D1_E.coli_(NaCl)	-0.55
D1_E.coli_(NaCl)	-0.2		D1_E.coli_(NaCl)	-0.480663
D1_E.coli_(NaCl)	0.0144928		D1_E.coli_(NaCl)	-0.609467
D1_E.coli_(NaCl)	-0.212766		D1_E.coli_(NaCl)	-0.625806
D1_E.coli_(NaCl)	-0.490566		D1_E.coli_(NaCl)	-0.671642
D1_E.coli_(NaCl)	0.0344828		D1_E.coli_(NaCl)	-0.503185
D5_E.coli_(naive)	0.627451		D1_E.coli_(NaCl)	-0.586207
D5_E.coli_(naive)	0.888889		D1_E.coli_(NaCl)	-0.625
D5_E.coli_(naive)	0.836735		D1_E.coli_(NaCl)	-0.492228
D5_E.coli_(naive)	0.707692		D5_E.coli_(naive)	0.606557
D5_E.coli_(naive)	0.843137		D5_E.coli_(naive)	0.571429
D5_E.coli_(naive)	0.754098		D5_E.coli_(naive)	0.714286
D5_E.coli_(naive)	0.708333		D5_E.coli_(naive)	0.60274
D5_E.coli_(naive)	0.601504		D5_E.coli_(naive)	0.55102
D5_E.coli_(naive)	0.927083		D5_E.coli_(naive)	0.364103
D5_E.coli_(naive)	0.945736		D5_E.coli_(naive)	0.58011
D5_E.coli_(naive)	0.8		D5_E.coli_(naive)	0.655629
D5_E.coli_(naive)	0.910448		D5_E.coli_(naive)	0.666667
D5_E.coli_(mock)	0.784615		D5_E.coli_(naive)	0.642553
D5_E.coli_(mock)	0.896552		D5_E.coli_(naive)	0.639344
D5_E.coli_(mock)	0.894737		D5_E.coli_(naive)	0.834101
D5_E.coli_(mock)	0.887097		D5_E.coli_(naive)	0.696078
D5_E.coli_(mock)	0.820896		D5_E.coli_(mock)	0.781513
D5_E.coli_(mock)	0.65		D5_E.coli_(mock)	0.672727
D5_E.coli_(mock)	0.866667		D5_E.coli_(mock)	0.842697
D5_E.coli_(mock)	0.621622		D5_E.coli_(mock)	0.52381
D5_E.coli_(mock)	0.861111		D5_E.coli_(mock)	0.539394
D5_E.coli_(mock)	0.869565		D5_E.coli_(mock)	0.171053
D5_E.coli_(mock)	0.735294		D5_E.coli_(mock)	0.690722
D5_E.coli_(mock)	0.703704		D5_E.coli_(mock)	0.506667
D5_E.coli_(NaCl)	-0.542857		D5_E.coli_(mock)	0.428571
D5_E.coli_(NaCl)	-0.285714		D5_E.coli_(mock)	0.370558
D5_E.coli_(NaCl)	-0.653846		D5_E.coli_(mock)	0.518797
D5_E.coli_(NaCl)	-0.451613		D5_E.coli_(mock)	0.711111
D5_E.coli_(NaCl)	-0.0416667		D5_E.coli_(mock)	0.6
D5_E.coli_(NaCl)	-0.352941		D5_E.coli_(NaCl)	-0.75
D5_E.coli_(NaCl)	-0.230769		D5_E.coli_(NaCl)	-0.896907
D5_E.coli_(NaCl)	-0.0526316		D5_E.coli_(NaCl)	-0.852459
D5_E.coli_(NaCl)	0.375		D5_E.coli_(NaCl)	-0.555556
D5_E.coli_(NaCl)	-0.166667		D5_E.coli_(NaCl)	-0.487179
D5_E.coli_(NaCl)	-0.777778		D5_E.coli_(NaCl)	-0.602941
D5_E.coli_(NaCl)	-0.375		D5_E.coli_(NaCl)	-0.497537
			D5_E.coli_(NaCl)	-0.585492
			D5_E.coli_(NaCl)	-0.557604
			D5_E.coli_(NaCl)	-0.72381
			D5_E.coli_(NaCl)	-0.66055
			D5_E.coli_(NaCl)	-0.461988
			D5_E.coli_(NaCl)	-0.553488
