# Supplementary material for: Bacterial diet affects the age-dependent decline of associative learning in Caenorhabditis elegans
Source: eLife. 2023 May 30;12:e81418. doi: 10.7554/eLife.81418 (PMC10229132; doi:10.7554/eLife.81418)
Supplement: Figure 1—source data 1. [file elife-81418-fig1-data1.xlsx]

## Sheet: Fig1BC_Data2
Source data for Figure 1B and 1C
17C center												23C center
Sample	Section 1	Section 2	Section 3	Section 4	Section 5	Section 6	Section 7	Section 8	Performance_index			Sample	Section 1	Section 2	Section 3	Section 4	Section 5	Section 6	Section 7	Section 8	Performance_index
D1	0.633588	0.221374	0.0839695	0.0305344	0.0152672	0	0	0.0152672	0.854962			D1	0.0785714	0.0285714	0.05	0.0785714	0.207143	0.192857	0.128571	0.235714	0.364286
D1	0.564885	0.290076	0.0992366	0.0229008	0.0229008	0	0	0	0.854962			D1	0.00680272	0.00680272	0.0272109	0.047619	0.0884354	0.163265	0.231293	0.428571	0.659864
D1	0.748634	0.191257	0.0327869	0.0218579	0	0	0.00546448	0	0.939891			D1	0	0.00826446	0.00826446	0.0330579	0.0495868	0.0743802	0.190083	0.636364	0.826446
D1	0.837398	0.105691	0.0162602	0.0243902	0.00813008	0	0	0.00813008	0.943089			D1	0.010101	0	0.020202	0.020202	0.040404	0.111111	0.212121	0.585859	0.79798
D1	0.5625	0.291667	0.09375	0.0416667	0	0	0.0104167	0	0.854167			D1	0	0	0.0864198	0.0246914	0.0493827	0.0123457	0.395062	0.432099	0.82716
D1	0.76	0.206667	0.0133333	0.00666667	0	0.00666667	0	0.00666667	0.966667			D1	0.0295858	0.0473373	0.0177515	0.0828402	0.0710059	0.142012	0.426036	0.183432	0.609467
D1	0.511278	0.300752	0.0827068	0.0451128	0.037594	0.0150376	0	0.0075188	0.81203			D1	0.0263158	0.00657895	0.0328947	0.151316	0.118421	0.236842	0.210526	0.217105	0.427632
D1	0.845638	0.0604027	0.033557	0.0201342	0.0201342	0.00671141	0.00671141	0.00671141	0.90604			D1	0.0952381	0.0748299	0.0408163	0.0136054	0.0816327	0.163265	0.183673	0.346939	0.530612
D1	0.65	0.21	0.06	0.01	0.01	0.04	0.01	0.01	0.86			D1	0.0416667	0.00833333	0.00833333	0.0166667	0.0333333	0.0916667	0.183333	0.616667	0.8
D1	0.737931	0.186207	0.0344828	0.0137931	0.0137931	0	0.00689655	0.00689655	0.924138			D1	0.0645161	0.0322581	0.0107527	0.0215054	0	0.0107527	0.0645161	0.795699	0.860215
D1	0.5	0.25	0.162162	0.0675676	0.0202703	0	0	0	0.75			D1	0.0133333	0	0.0266667	0.06	0.126667	0.14	0.246667	0.386667	0.633333
D1	0.716814	0.238938	0.0353982	0.00884956	0	0	0	0	0.955752			D1	0.029703	0.039604	0.029703	0.019802	0.029703	0.039604	0.0693069	0.742574	0.811881
D1	0.642857	0.277778	0.031746	0.015873	0.0238095	0	0.00793651	0	0.920635			D5	0	0.02	0.06	0.06	0.14	0.16	0.26	0.3	0.56
D5	0.655172	0.275862	0.0229885	0.0229885	0.0229885	0	0	0	0.931034			D5	0.0547945	0.0684932	0.0136986	0.0547945	0.0547945	0.219178	0.191781	0.342466	0.534247
D5	0.575472	0.141509	0.132075	0.113208	0.0188679	0.0188679	0	0	0.716981			D5	0.0434783	0.0217391	0.0217391	0.173913	0.217391	0.23913	0.152174	0.130435	0.282609
D5	0.697248	0.155963	0.0550459	0.0550459	0.0275229	0.00458716	0.00458716	0	0.853211			D5	0.0322581	0.0215054	0.0645161	0.16129	0.150538	0.11828	0.16129	0.290323	0.451613
D5	0.543689	0.184466	0.106796	0.126214	0.0291262	0.00970874	0	0	0.728155			D5	0	0	0.0714286	0.107143	0.357143	0.107143	0.142857	0.214286	0.357143
D5	0.52459	0.180328	0.169399	0.0601093	0.0655738	0	0	0	0.704918			D5	0	0.0178571	0	0.0357143	0.178571	0.25	0.214286	0.303571	0.517857
D5	0.352941	0.235294	0.27451	0.117647	0	0.0196078	0	0	0.588235			D5	0.030303	0	0	0.121212	0.515152	0.121212	0.0606061	0.151515	0.212121
D5	0.529412	0.235294	0.0392157	0.0980392	0.0196078	0.0588235	0	0.0196078	0.764706			D5	0.015625	0	0.0390625	0.125	0.273438	0.171875	0.171875	0.203125	0.375
D5	0.52381	0.0952381	0.214286	0.0714286	0.0714286	0	0	0.0238095	0.619048			D5	0.0365854	0.146341	0.182927	0.0853659	0.146341	0.0609756	0.158537	0.182927	0.341463
D5	0.467532	0.155844	0.0779221	0.12987	0.155844	0.012987	0	0	0.623377			D5	0.0212766	0.0851064	0.12766	0.0106383	0.191489	0.159574	0.159574	0.244681	0.404255
D5	0.538462	0.326923	0.0961538	0.0384615	0	0	0	0	0.865385			D5	0.0843373	0.108434	0.192771	0.144578	0.0963855	0.0722892	0.156627	0.144578	0.301205
D5	0.425926	0.203704	0.277778	0.0740741	0.0185185	0	0	0	0.62963			D5	0.011236	0.0561798	0.101124	0.0449438	0.168539	0.123596	0.179775	0.314607	0.494382
D5	0.592593	0.222222	0.148148	0.037037	0	0	0	0	0.814815
D5	0.54902	0.294118	0.0588235	0.0588235	0.0392157	0	0	0	0.843137
