# Supplementary material for: Bacterial diet affects the age-dependent decline of associative learning in Caenorhabditis elegans
Source: eLife. 2023 May 30;12:e81418. doi: 10.7554/eLife.81418 (PMC10229132; doi:10.7554/eLife.81418)
Supplement: Figure 1—source data 2. [file elife-81418-fig1-data2.xlsx]

## Sheet: Fig1D
Source data for Figure 1D
Age	Performance_index
D1	0.548077
D1	0.643617
D1	0.644809
D1	0.907563
D1	0.87619
D1	0.76
D1	0.854545
D1	0.682353
D1	0.495327
D1	0.73
D1	0.68
D1	0.61
D1	0.826667
D1	0.666667
D1	0.864865
D1	0.814815
D1	0.72327
D1	0.434109
D1	0.669014
D1	0.372093
D1	0.911392
D1	0.752475
D1	0.945946
D1	0.945455
D1	0.824324
D1	0.753333
D1	0.833333
D1	0.731707
D1	0.532895
D1	0.851648
D1	0.462264
D1	0.8125
D1	0.693333
D1	0.653595
D1	0.7875
D1	0.534031
D1	0.585761
D1	0.597222
D1	0.890244
D1	0.821429
D1	0.72973
D1	0.693548
D1	0.723077
D1	0.9375
D1	0.877551
D1	0.661654
D2	0.719298
D2	0.6
D2	0.607143
D2	0.292683
D2	0.554217
D2	0.884956
D2	0.459259
D2	0.763889
D3	0.628415
D3	0.268293
D3	0.53
D3	0.378378
D3	0.603306
D3	0.820513
D3	0.609091
D3	0.413462
D3	0.412698
D3	0.672269
D3	0.5375
D3	0.786164
D4	0.37594
D4	0.38806
D4	0.643357
D4	0.594771
D4	0.33526
D4	0.338583
D4	0.309353
D4	0.457364
D4	0.485981
D4	0.688525
D4	0.643836
D4	0.508772
D4	0.505155
D4	0.580311
D4	0.628205
D5	0.111111
D5	0.234483
D5	0.254658
D5	0.144737
D5	0.101796
D5	0.202454
D5	0.171123
D5	0.16
D5	0.13
D5	0.12
D5	0.08
D5	0.476821
D5	0.48855
D5	0.393617
D5	0.451777
D5	0.380952
D5	0.52381
D5	0.21875
D5	0.284884
D5	0.0873786
D5	0.175182
D5	0.258503
D5	0.254902
D5	0.164286
D5	0.277108
D5	0.209677
D5	0.181102
D5	0.232227
D5	0.511111
D5	0.305556
D5	0.45122
