# Supplementary material for: Bacterial diet affects the age-dependent decline of associative learning in Caenorhabditis elegans
Source: eLife. 2023 May 30;12:e81418. doi: 10.7554/eLife.81418 (PMC10229132; doi:10.7554/eLife.81418)
Supplement: Figure 2—figure supplement 1—source data 1. [file elife-81418-fig2-figsupp1-data1.xlsx]

## Sheet: Sheet1
Source data for Figure 2-Figure supplement 1B and 1C
Strain	Condition	Section 1	Section 2	Section 3	Section 4	Section 5	Section 6	Section 7	Section 8	Thermotaxis index
N2	wt_D1	0.184615	0.169231	0.169231	0.215385	0.153846	0.0923077	0.0153846	0	3.32308
N2	wt_D1	0.108911	0.178218	0.168317	0.247525	0.237624	0.0594059	0	0	3.50495
N2	wt_D1	0.107692	0.130769	0.238462	0.253846	0.215385	0.0461538	0.00769231	0	3.50769
N2	wt_D1	0.0413223	0.0661157	0.0661157	0.578512	0.14876	0.0826446	0.00826446	0.00826446	4.04959
N2	wt_D1	0.0857143	0.0857143	0.114286	0.257143	0.257143	0.0857143	0.0571429	0.0571429	4.28571
N2	wt_D1	0	0.0185185	0.037037	0.12963	0.240741	0.425926	0.0925926	0.0555556	5.51852
N2	wt_D1	0	0	0	0.0967742	0.322581	0.354839	0.0322581	0.193548	5.90323
N2	wt_D1	0.0238095	0	0.142857	0.309524	0.309524	0.142857	0.0238095	0.047619	4.64286
N2	wt_D1	0	0	0.0416667	0.125	0.5	0.166667	0.125	0.0416667	5.33333
N2	wt_D1	0.0188679	0.0377358	0.150943	0.433962	0.301887	0.0188679	0.0377358	0	4.16981
N2	wt_D1	0	0	0	0.208333	0.25	0.375	0	0.166667	5.66667
N2	wt_D5_E.coli	0.0917431	0.100917	0.422018	0.330275	0.0550459	0	0	0	3.15596
N2	wt_D5_E.coli	0.0740741	0.0888889	0.259259	0.422222	0.125926	0.0296296	0	0	3.52593
N2	wt_D5_E.coli	0.0215827	0.0647482	0.172662	0.431655	0.201439	0.057554	0.0359712	0.0143885	4.11511
N2	wt_D5_E.coli	0.0258065	0.0451613	0.103226	0.283871	0.309677	0.187097	0.0451613	0	4.54839
N2	wt_D5_E.coli	0	0	0.05	0.0833333	0.416667	0.333333	0.0666667	0.05	5.43333
N2	wt_D5_E.coli	0	0.0135135	0.0135135	0.472973	0.256757	0.148649	0.027027	0.0675676	4.86486
N2	wt_D5_E.coli	0.0833333	0.0208333	0.0833333	0.416667	0.229167	0.125	0.0416667	0	4.22917
N2	wt_D5_E.coli	0	0	0.027027	0.216216	0.418919	0.216216	0.0540541	0.0675676	5.25676
N2	wt_D5_E.coli	0	0.0196078	0.0588235	0.333333	0.284314	0.127451	0.0294118	0.147059	5.11765
N2	wt_D5_E.coli	0	0	0	0.162791	0.372093	0.162791	0.209302	0.0930233	5.69767
IK656	tax-6_D5_E.coli	0	0	0.0153846	0.0615385	0.323077	0.261538	0.153846	0.184615	6.03077
IK656	tax-6_D5_E.coli	0.0128205	0.0128205	0	0.0897436	0.294872	0.217949	0.179487	0.192308	5.97436
IK656	tax-6_D5_E.coli	0	0	0	0.115385	0.134615	0.115385	0.230769	0.403846	6.67308
IK656	tax-6_D5_E.coli	0	0.010989	0	0.0659341	0.186813	0.032967	0.274725	0.428571	6.76923
IK656	tax-6_D5_E.coli	0	0	0	0.028169	0.084507	0.056338	0.253521	0.577465	7.26761
IK656	tax-6_D5_E.coli	0.00699301	0.00699301	0.048951	0.104895	0.104895	0.195804	0.237762	0.293706	6.3007
N2	wt_D5_Lb.plantarum	0.0412371	0.0103093	0.0515464	0.639175	0.216495	0.0412371	0	0	4.10309
N2	wt_D5_Lb.plantarum	0.0192308	0	0	0.326923	0.384615	0.153846	0.0961538	0.0192308	5
N2	wt_D5_Lb.plantarum	0	0.0135135	0	0.175676	0.432432	0.256757	0.0675676	0.0540541	5.33784
N2	wt_D5_Lb.plantarum	0	0.0128205	0.0128205	0.153846	0.384615	0.282051	0.115385	0.0384615	5.41026
N2	wt_D5_Lb.reuteri	0.0630631	0.108108	0.045045	0.369369	0.324324	0.0630631	0.027027	0	4.08108
N2	wt_D5_Lb.reuteri	0.0129032	0.00645161	0.0451613	0.303226	0.380645	0.193548	0.0193548	0.0387097	4.88387
N2	wt_D5_Lb.reuteri	0.00813008	0	0.0243902	0.260163	0.455285	0.219512	0.0325203	0	4.94309
N2	wt_D5_Lb.reuteri	0	0.0136364	0.00454546	0.140909	0.590909	0.195455	0.0363636	0.0181818	5.13182
N2	wt_D5_Lb.rhamnosus	0.020202	0.040404	0.111111	0.191919	0.333333	0.181818	0.040404	0.0808081	4.88889
N2	wt_D5_Lb.rhamnosus	0.0104167	0.0104167	0.09375	0.145833	0.28125	0.25	0.145833	0.0625	5.32292
N2	wt_D5_Lb.rhamnosus	0	0	0.0555556	0.111111	0.402778	0.305556	0.0833333	0.0416667	5.375
N2	wt_D5_Lb.rhamnosus	0	0	0.0136986	0.150685	0.410959	0.287671	0.0958904	0.0410959	5.42466
N2	wt_D5_P.pentosaceus	0.010989	0.0549451	0.0494505	0.241758	0.318681	0.247253	0.0659341	0.010989	4.86264
N2	wt_D5_P.pentosaceus	0	0.0245902	0.0983607	0.139344	0.336066	0.295082	0.0983607	0.00819672	5.10656
N2	wt_D5_P.pentosaceus	0	0.0252101	0.00840336	0.117647	0.260504	0.470588	0.10084	0.0168067	5.51261
N2	wt_D5_P.pentosaceus	0.00943396	0	0	0.141509	0.169811	0.226415	0.367925	0.0849057	6.03774
