# Supplementary material for: Bacterial diet affects the age-dependent decline of associative learning in Caenorhabditis elegans
Source: eLife. 2023 May 30;12:e81418. doi: 10.7554/eLife.81418 (PMC10229132; doi:10.7554/eLife.81418)
Supplement: Figure 2—source data 1. [file elife-81418-fig2-data1.xlsx]

## Sheet: Fig2B
Source data for Figure 2B
Sample	Performance_index
D1	0.71875
D1	0.115385
D1	0.548347
D1	0.605292
D1	0.845638
D1	0.365838
D1	0.671466
D1	0.896637
D1	0.677847
D1	0.849076
D1	0.777745
D1	0.715288
D1	0.830861
D1	0.715119
D1	0.75838
D1	0.676278
D1	0.553039
D1	0.720588
D1	0.718954
D1	0.618182
D1	0.654412
D1	0.517241
D1	0.631285
D1	0.699248
D1	0.854545
D1	0.682353
D1	0.495327
D1	0.80531
D1	0.84106
D1	0.902174
D1	0.852941
D1	0.419162
D1	0.823077
D1	0.71875
D1	0.115385
D1	0.548347
D1	0.605292
D1	0.845638
D1	0.365838
D1	0.671466
D1	0.896637
D1	0.677847
D1	0.849076
D1	0.777745
D1	0.715288
D1	0.830861
D1	0.715119
D1	0.75838
D1	0.676278
D1	0.553039
D1	0.720588
D1	0.718954
D1	0.618182
D1	0.654412
D1	0.517241
D1	0.631285
D1	0.699248
D1	0.854545
D1	0.682353
D1	0.495327
D1	0.80531
D1	0.84106
D1	0.902174
D1	0.852941
D1	0.419162
D1	0.823077
D1	0.71875
D1	0.115385
E. coli	0.134831
E. coli	0.0930233
E. coli	0.131993
E. coli	0.271424
E. coli	0.163335
E. coli	0.266826
E. coli	0.271707
E. coli	0.173819
E. coli	0.293286
E. coli	0.215163
E. coli	0.210492
E. coli	0.261548
E. coli	0.035682
E. coli	0.0659341
E. coli	0.12844
E. coli	0.0431034
E. coli	0.291339
E. coli	0.109756
E. coli	0.149425
E. coli	0.162393
E. coli	0.0457516
E. coli	0.100629
E. coli	0.267176
E. coli	0.0962963
E. coli	0.130435
E. coli	0.0480769
E. coli	0.12782
E. coli	0.0617284
E. coli	0.0416667
E. coli	0.134831
E. coli	0.0930233
E. coli	0.131993
E. coli	0.271424
E. coli	0.163335
E. coli	0.266826
E. coli	0.271707
E. coli	0.173819
E. coli	0.293286
E. coli	0.215163
E. coli	0.210492
E. coli	0.261548
E. coli	0.035682
E. coli	0.0659341
E. coli	0.12844
E. coli	0.0431034
E. coli	0.291339
E. coli	0.109756
E. coli	0.149425
E. coli	0.162393
E. coli	0.0457516
E. coli	0.100629
E. coli	0.267176
E. coli	0.0962963
E. coli	0.130435
E. coli	0.0480769
E. coli	0.12782
E. coli	0.0617284
E. coli	0.0416667
E. coli	0.134831
E. coli	0.0930233
Lactobacillus mucosae	0.695652
Lactobacillus mucosae	0.628571
Lactobacillus mucosae	0.528926
Lactobacillus mucosae	0.653061
Lactobacillus fermentum	0.578781
Lactobacillus fermentum	0.514036
Lactobacillus fermentum	0.452537
Lactobacillus fermentum	0.494654
Bifidobacterium longum	0.431193
Bifidobacterium longum	0.395604
Bifidobacterium longum	0.542553
Bifidobacterium longum	0.301587
Bifidobacterium longum	0.508333
Bifidobacterium longum	0.362963
Lactobacillus helveticus	NA
Bifidobacterium pseudocatenulatum	0.330645
Bifidobacterium pseudocatenulatum	0.280822
Bifidobacterium pseudocatenulatum	0.138889
Bifidobacterium pseudocatenulatum	0.206349
Bifidobacterium pseudocatenulatum	0.330645
Bifidobacterium pseudocatenulatum	0.138889
Bifidobacterium pseudocatenulatum	0.206349
Bifidobacterium pseudocatenulatum	0.280822
Streptococcus mitis	NA
Leuconostoc mesenteroides subsp. mesenteroides	0.0491803
Leuconostoc mesenteroides subsp. mesenteroides	0.0327869
Lactobacillus delbrueckii supsp. delbrueckii	0.318182
Lactobacillus delbrueckii supsp. delbrueckii	0.469565
Lactobacillus delbrueckii supsp. delbrueckii	0.271605
Lactobacillus delbrueckii supsp. delbrueckii	0.463918
Lactobacillus johnsonii	0.1375
Lactobacillus johnsonii	0.313869
Lactobacillus johnsonii	0.429577
Lactobacillus johnsonii	0.225352
Lactobacillus johnsonii	0.704082
Lactobacillus reuteri	0.754902
Lactobacillus reuteri	0.763441
Lactobacillus reuteri	0.703704
Lactobacillus reuteri	0.868687
Pediococcus pentosaceus	0.968085
Pediococcus pentosaceus	0.873016
Pediococcus pentosaceus	0.8375
Pediococcus pentosaceus	0.854545
Bifidobacterium adolesentis	0.530303
Bifidobacterium adolesentis	0.261538
Bifidobacterium adolesentis	0.187097
Bifidobacterium adolesentis	0.272727
Bifidobacterium adolesentis	0.530303
Bifidobacterium adolesentis	0.187097
Bifidobacterium adolesentis	0.272727
Bifidobacterium adolesentis	0.261538
Lactobacillus casei	0.562333
Lactobacillus casei	0.422067
Lactobacillus casei	0.71916
Lactobacillus casei	0.476515
Lactobacillus casei	0.610494
Lactobacillus casei	0.714781
Lactobacillus casei	0.34223
Leuconostoc mesenteroides subsp. dextranicum	0.45
Leuconostoc mesenteroides subsp. dextranicum	0.464286
Leuconostoc mesenteroides subsp. dextranicum	0.52809
Leuconostoc mesenteroides subsp. dextranicum	0.732394
Leuconostoc mesenteroides subsp. dextranicum	0.508475
Lactobacillus amylovorus	0.180952
Lactobacillus amylovorus	0.148515
Lactobacillus amylovorus	0.292453
Lactobacillus amylovorus	0.245763
Bifidobacterium bifidum	0.417582
Bifidobacterium bifidum	0.716814
Bifidobacterium bifidum	0.204819
Bifidobacterium bifidum	0.459184
Bifidobacterium bifidum	0.417582
Bifidobacterium bifidum	0.716814
Bifidobacterium bifidum	0.204819
Bifidobacterium bifidum	0.459184
Bifidobacterium catenulatum	0.567376
Bifidobacterium catenulatum	0.454545
Bifidobacterium catenulatum	0.246377
Bifidobacterium catenulatum	0.327586
Bifidobacterium catenulatum	0.454545
Bifidobacterium catenulatum	0.567376
Bifidobacterium catenulatum	0.246377
Bifidobacterium catenulatum	0.327586
Bifidobacterium pseudolongum	0.686567
Bifidobacterium pseudolongum	0.368056
Bifidobacterium pseudolongum	0.160377
Bifidobacterium pseudolongum	0.362069
Bifidobacterium pseudolongum	0.160377
Bifidobacterium pseudolongum	0.686567
Bifidobacterium pseudolongum	0.368056
Bifidobacterium pseudolongum	0.362069
Lactobacillus brevis	NA
Lactobacillus gallinarum	0.61856
Lactobacillus gallinarum	0.510254
Lactobacillus gallinarum	0.663934
Lactobacillus gallinarum	0.415059
Lactobacillus gallinarum	0.54902
Lactobacillus gallinarum	0.714286
Lactobacillus gallinarum	0.651852
Lactobacillus gallinarum	0.454545
Lactobacillus gallinarum	0.539062
Lactobacillus vaginalis	NA
Leuconostoc lactis	0.378378
Leuconostoc lactis	0.433962
Leuconostoc lactis	0.220238
Leuconostoc lactis	0.438776
Leuconostoc lactis	0.318681
Leuconostoc mesenteroides subsp. cremoris	0.284404
Leuconostoc mesenteroides subsp. cremoris	0.315385
Leuconostoc mesenteroides subsp. cremoris	0.117021
Leuconostoc mesenteroides subsp. cremoris	0.27957
Pediococcus acidilactici	0.392308
Pediococcus acidilactici	0.454545
Pediococcus acidilactici	0.552795
Pediococcus acidilactici	0.712644
Pediococcus acidilactici	0.491935
Lactobacillus gasseri	0.238865
Lactobacillus gasseri	0.204279
Lactobacillus gasseri	0.242322
Lactobacillus gasseri	0.440912
Lactobacillus gasseri	0.457783
Lactobacillus gasseri	0.287261
Lactobacillus gasseri	0.392674
Lactobacillus gasseri	0.235641
Lactobacillus paracasei	0.696464
Lactobacillus paracasei	0.721655
Lactobacillus paracasei	0.576309
Lactobacillus paracasei	0.669939
Lactobacillus paracasei	0.35461
Lactobacillus paracasei	0.639007
Lactobacillus paracasei	0.663129
Lactobacillus paracasei	0.69788
Lactobacillus plantarum	0.682692
Lactobacillus plantarum	0.675439
Lactobacillus plantarum	0.825
Lactobacillus plantarum	0.719512
Lactobacillus delbrueckii supsp. delbrueckii	0.56701
Lactobacillus delbrueckii supsp. delbrueckii	0.664179
Lactobacillus delbrueckii supsp. delbrueckii	0.661111
Lactobacillus delbrueckii supsp. delbrueckii	0.476562
Lactobacillus delbrueckii supsp. delbrueckii	0.639706
Lactobacillus rhamnosus	0.692311
Lactobacillus rhamnosus	0.526327
Lactobacillus rhamnosus	0.527144
Lactobacillus rhamnosus	0.799082
Lactobacillus rhamnosus	0.844411
Lactobacillus rhamnosus	0.724938
Lactococcus lactis subsp. lactis	NA
Streptococcus thermophilus	0.619029
Streptococcus thermophilus	0.366687
Streptococcus thermophilus	0.676422
Streptococcus thermophilus	0.66959
Lactococcus lactis subsp. cremoris	0.144444
Lactococcus lactis subsp. cremoris	0.0984848
Lactococcus lactis subsp. cremoris	0.0629371
Lactococcus lactis subsp. cremoris	0.192308
Lactococcus lactis subsp. cremoris	0.084507
Lactococcus lactis subsp. cremoris	0.0630631
Bifidobacterium breve	0.34375
Bifidobacterium breve	0.309859
Bifidobacterium breve	0.406593
Bifidobacterium breve	0.4
Bifidobacterium breve	0.534483
Bifidobacterium breve	0.451613
Leuconostoc mesenteroides subsp. mesenteroides	0.25
Leuconostoc mesenteroides subsp. mesenteroides	0.164706
Leuconostoc mesenteroides subsp. mesenteroides	0.130435
Leuconostoc pseudomesenteroides	0.030303
Leuconostoc pseudomesenteroides	0
Leuconostoc pseudomesenteroides	0
Lactobacillus acidophilus	0.41192
Lactobacillus acidophilus	0.369206
Lactobacillus acidophilus	0.193503
Lactobacillus acidophilus	0.46714
Lactobacillus delbrueckii supsp. lactis	0.149733
Lactobacillus delbrueckii supsp. lactis	0.234375
Lactobacillus delbrueckii supsp. lactis	0.0714286
