# Supplementary material for: Bacterial diet affects the age-dependent decline of associative learning in Caenorhabditis elegans
Source: eLife. 2023 May 30;12:e81418. doi: 10.7554/eLife.81418 (PMC10229132; doi:10.7554/eLife.81418)
Supplement: Figure 3—source data 1. [file elife-81418-fig3-data1.xlsx]

## Sheet: Fig3A
Source data for Figure 3A
23C culture, 20C center
Sample	Section 1	Section 2	Section 3	Section 4	Section 5	Section 6	Section 7	Section 8	Performance_index
D1	0.0108696	0.0217391	0.0434783	0.0434783	0.076087	0.163043	0.173913	0.467391	0.641304
D1	0.016129	0.016129	0.0322581	0.0483871	0.0967742	0.0322581	0.177419	0.580645	0.758065
D1	0.0666667	0.0444444	0.0555556	0.0222222	0.0444444	0.0222222	0.1	0.644444	0.744444
D1	0.0671642	0.0298507	0.0447761	0.0746269	0.0671642	0.141791	0.134328	0.440299	0.574627
D1	0.172131	0.057377	0.0655738	0.0163934	0.0409836	0.0655738	0.057377	0.52459	0.581967
D1	0	0.0232558	0.00581395	0.0406977	0.0697674	0.116279	0.0930233	0.651163	0.744186
D5_E.coli	0.0316456	0.0316456	0.101266	0.202532	0.246835	0.177215	0.107595	0.101266	0.208861
D5_E.coli	0	0	0.0492958	0.190141	0.514085	0.0915493	0.126761	0.028169	0.15493
D5_E.coli	0.00617284	0.00617284	0.0617284	0.320988	0.302469	0.166667	0.0802469	0.0555556	0.135802
D5_E.coli	0	0	0.00735294	0.132353	0.330882	0.176471	0.154412	0.198529	0.352941
D5_E.coli	0	0	0.0247934	0.371901	0.280992	0.0826446	0.0743802	0.165289	0.239669
D5_E.coli	0	0	0.0273973	0.39726	0.232877	0.136986	0.0684932	0.136986	0.205479
D5_Lb.plantarum	0	0	0.0138889	0.0972222	0.152778	0.180556	0.333333	0.222222	0.555556
D5_Lb.plantarum	0	0.010101	0	0.0505051	0.0808081	0.0909091	0.262626	0.505051	0.767677
D5_Lb.plantarum	0	0	0	0.0384615	0.0769231	0.282051	0.128205	0.474359	0.602564
D5_Lb.plantarum	0	0.0140845	0.0140845	0.084507	0.169014	0.126761	0.211268	0.380282	0.591549
D5_Lb.plantarum	0	0	0	0.0517241	0.0517241	0.137931	0.310345	0.448276	0.758621
D5_Lb.plantarum	0	0	0	0.233333	0.0555556	0.0666667	0.177778	0.466667	0.644444
D5_Lb.reuteri	0.00716846	0.00358423	0.00716846	0.0286738	0.0967742	0.150538	0.594982	0.111111	0.706093
D5_Lb.reuteri	0	0.00833333	0	0.025	0.0666667	0.175	0.433333	0.291667	0.725
D5_Lb.reuteri	0	0	0.00632911	0.0316456	0.0443038	0.0886076	0.189873	0.639241	0.829114
D5_Lb.reuteri	0	0.0181818	0	0.0545455	0.0727273	0.0363636	0.127273	0.690909	0.818182
D5_Lb.reuteri	0	0.0196078	0	0.0196078	0.0784314	0.117647	0.333333	0.431373	0.764706
D5_Lb.reuteri	0	0	0	0	0	0.157895	0.289474	0.552632	0.842105
D5_Lb.rhamnosus	0	0.0277778	0	0.0277778	0.0555556	0.194444	0.138889	0.555556	0.694444
D5_Lb.rhamnosus	0	0.00746269	0	0.0373134	0.0820896	0.0895522	0.208955	0.574627	0.783582
D5_Lb.rhamnosus	0.0232558	0	0	0.0465116	0	0.116279	0.0697674	0.744186	0.813953
D5_Lb.rhamnosus	0	0.0106383	0	0.0212766	0.0638298	0.202128	0.287234	0.414894	0.702128
D5_Lb.rhamnosus	0	0	0	0.0217391	0.0217391	0.0434783	0.0217391	0.891304	0.913043
D5_P.pentosaceus	0	0.00775194	0.0232558	0.0310078	0.0232558	0.0310078	0.325581	0.55814	0.883721
D5_P.pentosaceus	0	0.0155039	0.0155039	0.0232558	0.0155039	0.0930233	0.147287	0.689922	0.837209
D5_P.pentosaceus	0	0.00847458	0.0169492	0.0169492	0.0338983	0.0423729	0.271186	0.610169	0.881356
D5_P.pentosaceus	0.0437956	0.00729927	0.0145985	0.0364963	0.0656934	0.0948905	0.255474	0.481752	0.737226
D5_P.pentosaceus	0	0.0196078	0.0196078	0.0588235	0.156863	0.117647	0.156863	0.470588	0.627451
D5_P.pentosaceus	0.00952381	0.00952381	0.0190476	0.0666667	0.104762	0.209524	0.228571	0.352381	0.580952
D5_P.pentosaceus	0	0	0	0.0465116	0.104651	0.151163	0.244186	0.453488	0.697674
