# Supplementary material for: Bacterial diet affects the age-dependent decline of associative learning in Caenorhabditis elegans
Source: eLife. 2023 May 30;12:e81418. doi: 10.7554/eLife.81418 (PMC10229132; doi:10.7554/eLife.81418)
Supplement: Figure 3—source data 2. [file elife-81418-fig3-data2.xlsx]

## Sheet: Fig3B_3C
Source data for Figure 3B and 3C
23C->17C culture, 20C center											23C culture, 20C center
Sample	Section 1	Section 2	Section 3	Section 4	Section 5	Section 6	Section 7	Section 8	Performance_index		Sample	Section 1	Section 2	Section 3	Section 4	Section 5	Section 6	Section 7	Section 8	Performance_index
D1	0.724138	0.137931	0.103448	0	0.0344828	0	0	0	0.862069		D1	0.0857143	0.0857143	0.114286	0.257143	0.257143	0.0857143	0.0571429	0.0571429	0.114286
D1	0.239437	0.492958	0.197183	0.056338	0.0140845	0	0	0	0.732394		D1	0.107692	0.130769	0.238462	0.253846	0.215385	0.0461538	0.00769231	0	0.00769231
D1	0.47205	0.347826	0.142857	0.0310559	0	0.00621118	0	0	0.819876		D1	0.184615	0.169231	0.169231	0.215385	0.153846	0.0923077	0.0153846	0	0.0153846
D1	0.367188	0.265625	0.234375	0.109375	0.015625	0.0078125	0	0	0.632812		D1	0.108911	0.178218	0.168317	0.247525	0.237624	0.0594059	0	0	0
D5_E.coli	0.184783	0.119565	0.228261	0.326087	0.0978261	0.0326087	0.0108696	0	0.304348		D1	0.0413223	0.0661157	0.0661157	0.578512	0.14876	0.0826446	0.00826446	0.00826446	0.0165289
D5_E.coli	0.210938	0.289062	0.21875	0.195312	0.0546875	0.0234375	0	0.0078125	0.5		D5_E.coli	0.0917431	0.100917	0.422018	0.330275	0.0550459	0	0	0	0
D5_E.coli	0.352113	0.225352	0.183099	0.15493	0.028169	0.056338	0	0	0.577465		D5_E.coli	0.0740741	0.0888889	0.259259	0.422222	0.125926	0.0296296	0	0	0
D5_E.coli	0.138889	0.194444	0.194444	0.305556	0.138889	0.0277778	0	0	0.333333		D5_E.coli	0.0215827	0.0647482	0.172662	0.431655	0.201439	0.057554	0.0359712	0.0143885	0.0503597
D5_Lb.plantarum	0.385246	0.114754	0.114754	0.147541	0.131148	0.0245902	0.0245902	0.057377	0.5		D5_E.coli	0.0258065	0.0451613	0.103226	0.283871	0.309677	0.187097	0.0451613	0	0.0451613
D5_Lb.plantarum	0.376471	0.164706	0.117647	0.176471	0.0705882	0.0352941	0.0235294	0.0352941	0.541176		D5_Lb.plantarum	0.0412371	0.0103093	0.0515464	0.639175	0.216495	0.0412371	0	0	0
D5_Lb.plantarum	0.173913	0.108696	0.23913	0.195652	0.217391	0.0434783	0.0217391	0	0.282609		D5_Lb.plantarum	0.0192308	0	0	0.326923	0.384615	0.153846	0.0961538	0.0192308	0.115385
D5_Lb.plantarum	0.179487	0.230769	0.205128	0.282051	0.102564	0	0	0	0.410256		D5_Lb.plantarum	0	0.0135135	0	0.175676	0.432432	0.256757	0.0675676	0.0540541	0.121622
D5_Lb.reuteri	0.361702	0.143617	0.154255	0.175532	0.0691489	0.037234	0.0265957	0.0319149	0.505319		D5_Lb.plantarum	0	0.0128205	0.0128205	0.153846	0.384615	0.282051	0.115385	0.0384615	0.153846
D5_Lb.reuteri	0.321429	0.178571	0.205357	0.151786	0.107143	0.0357143	0	0	0.5		D5_Lb.reuteri	0.00813008	0	0.0243902	0.260163	0.455285	0.219512	0.0325203	0	0.0325203
D5_Lb.reuteri	0.3	0.169231	0.269231	0.138462	0.0769231	0.0461538	0	0	0.469231		D5_Lb.reuteri	0.0129032	0.00645161	0.0451613	0.303226	0.380645	0.193548	0.0193548	0.0387097	0.0580645
D5_Lb.reuteri	0.285714	0.2	0.171429	0.214286	0.0857143	0.0285714	0.0142857	0	0.485714		D5_Lb.reuteri	0.0630631	0.108108	0.045045	0.369369	0.324324	0.0630631	0.027027	0	0.027027
D5_Lb.rhamnosus	0.327869	0.213115	0.245902	0.131148	0.0819672	0	0	0	0.540984		D5_Lb.reuteri	0	0.0136364	0.00454546	0.140909	0.590909	0.195455	0.0363636	0.0181818	0.0545455
D5_Lb.rhamnosus	0.206897	0.287356	0.149425	0.195402	0.114943	0.045977	0	0	0.494253		D5_Lb.rhamnosus	0	0	0.0555556	0.111111	0.402778	0.305556	0.0833333	0.0416667	0.125
D5_Lb.rhamnosus	0.227273	0.272727	0.227273	0.227273	0.0227273	0.0227273	0	0	0.5		D5_Lb.rhamnosus	0.020202	0.040404	0.111111	0.191919	0.333333	0.181818	0.040404	0.0808081	0.121212
D5_Lb.rhamnosus	0.285714	0.232143	0.25	0.0714286	0.107143	0.0357143	0	0.0178571	0.517857		D5_Lb.rhamnosus	0.0104167	0.0104167	0.09375	0.145833	0.28125	0.25	0.145833	0.0625	0.208333
D5_P.pentosaceus	0.318182	0.159091	0.143939	0.0757576	0.121212	0.106061	0.0151515	0.0606061	0.477273		D5_Lb.rhamnosus	0	0	0.0136986	0.150685	0.410959	0.287671	0.0958904	0.0410959	0.136986
D5_P.pentosaceus	0.258883	0.152284	0.116751	0.121827	0.167513	0.121827	0.0456853	0.0152284	0.411168		D5_P.pentosaceus	0	0.0245902	0.0983607	0.139344	0.336066	0.295082	0.0983607	0.00819672	0.106557
D5_P.pentosaceus	0.235955	0.0898876	0.247191	0.280899	0.0561798	0.0449438	0.0337079	0.011236	0.325843		D5_P.pentosaceus	0	0.0252101	0.00840336	0.117647	0.260504	0.470588	0.10084	0.0168067	0.117647
D5_P.pentosaceus	0.0806452	0.193548	0.225806	0.306452	0.129032	0.0483871	0.016129	0	0.274194		D5_P.pentosaceus	0.010989	0.0549451	0.0494505	0.241758	0.318681	0.247253	0.0659341	0.010989	0.0769231
											D5_P.pentosaceus	0.00943396	0	0	0.141509	0.169811	0.226415	0.367925	0.0849057	0.45283
