# Supplementary material for: Bacterial diet affects the age-dependent decline of associative learning in Caenorhabditis elegans
Source: eLife. 2023 May 30;12:e81418. doi: 10.7554/eLife.81418 (PMC10229132; doi:10.7554/eLife.81418)
Supplement: Figure 4—figure supplement 1—source data 1. [file elife-81418-fig4-figsupp1-data1.xlsx]

## Sheet: Sheet1
Source data for Figure 4-Figure supplement 1
Condition	Performance index
D1_pep-free	0.844444
D1_pep-free	0.727273
D1_pep-free	0.772727
D1_pep-free	0.561404
D1_pep-free	0.655172
D1_pep-free	0.666667
D5_E.coli_pep-free	0.390909
D5_E.coli_pep-free	0.411111
D5_E.coli_pep-free	0.305195
D5_E.coli_pep-free	0.172414
D5_E.coli_pep-free	0.363636
D5_E.coli_pep-free	0.295082
D5_E.coli_pep-free	0.357798
D5_E.coli_pep-free	0.421687
D5_E.coli_pep-free	0.349462
D5_E.coli_pep-free	0.310345
D5_Lb.reuteri_pep-free	0.674157
D5_Lb.reuteri_pep-free	0.616667
D5_Lb.reuteri_pep-free	0.377778
D5_Lb.reuteri_pep-free	0.810811
D5_Lb.reuteri_pep-free	0.635135
D5_Lb.reuteri_pep-free	0.875
D5_Lb.reuteri_pep-free	0.489796
D5_Lb.reuteri_pep-free	0.631579
D5_Lb.reuteri_pep-free	0.698413
D5_Lb.reuteri_pep-free	0.75
