# Supplementary material for: Bacterial diet affects the age-dependent decline of associative learning in Caenorhabditis elegans
Source: eLife. 2023 May 30;12:e81418. doi: 10.7554/eLife.81418 (PMC10229132; doi:10.7554/eLife.81418)
Supplement: Figure 4—source data 1. [file elife-81418-fig4-data1.xlsx]

## Sheet: Fig4A
Source data for Figure 4A
1=Dead, 0=Censored
Days of adulthood	E. coli	P. pentosaceus		Days of adulthood	E. coli	Lb. reuteri		Days of adulthood	E. coli	Lb. plantarum		Days of adulthood	E. coli	Lb. rhamnosus
2	0			3	0			2	0			2	0
2	0			3	0			3	0			2	0
3	0			8	1			6	1			3	0
4	0			9	1			6	1			4	0
5	1			10	1			6	0			5	1
5	1			11	1			9	1			5	1
7	1			13	1			9	1			7	1
7	1			14	1			10	1			7	1
9	1			14	1			11	1			9	1
11	1			15	1			11	1			11	1
12	1			17	1			12	1			12	1
12	1			17	1			12	1			12	1
12	1			17	1			13	1			12	1
12	1			17	1			14	1			12	1
13	1			17	1			15	1			13	1
13	1			17	1			15	1			13	1
13	1			18	1			15	1			13	1
13	1			18	1			15	1			13	1
14	1			18	1			15	1			14	1
16	1			19	1			15	1			16	1
16	1			19	1			15	1			16	1
16	1			20	1			16	1			16	1
17	1			21	1			17	1			17	1
19	1			21	1			18	1			19	1
21	1			23	1			21	1			21	1
2		0		2		0		2		0		2		0
2		0		2		0		2		0		2		0
2		0		2		0		2		0		2		0
2		0		2		0		2		0		2		0
2		0		2		0		2		0		2		0
2		0		2		0		3		0		2		0
2		0		2		0		3		0		2		0
2		0		2		0		3		0		2		0
2		0		2		0		3		0		2		0
2		0		3		1		3		0		2		0
3		0		3		1		3		0		2		0
3		0		3		0		3		0		3		1
3		0		3		0		3		0		3		1
4		1		3		0		3		0		3		1
4		0		3		0		3		1		3		1
4		0		3		0		4		1		3		1
4		0		5		0		4		0		3		1
4		0		14		1		5		1		3		1
6		0		14		1		6		1		3		1
11		1		14		1		7		1		3		1
12		0		15		1		10		1		3		1
21		1		15		1		11		1		4		1
22		1		15		1		11		1		4		1
24		1		17		1		12		1		4		1
26		1		18		1		20		1		5		1
6	0			2	0			2	0			6	0
6	0			3	0			2	0			6	0
10	1			6	1			3	1			10	1
10	1			6	1			3	1			10	1
11	1			6	0			8	1			11	1
11	1			9	1			8	1			11	1
11	1			9	1			8	1			11	1
12	1			10	1			9	1			12	1
12	1			11	1			11	1			12	1
13	1			11	1			11	1			13	1
13	1			12	1			11	1			13	1
13	1			12	1			12	1			13	1
13	1			13	1			12	1			13	1
13	1			14	1			12	1			13	1
13	1			15	1			12	1			13	1
14	1			15	1			13	1			14	1
14	1			15	1			14	1			14	1
14	1			15	1			14	1			14	1
14	1			15	1			14	1			14	1
15	1			15	1			15	1			15	1
16	1			15	1			16	1			16	1
16	1			16	1			16	1			16	1
18	1			17	1			18	1			18	1
19	1			18	1			18	1			19	1
19	1			21	1			19	1			19	1
2		0		2		0		2		0		2		1
2		0		2		0		2		0		2		1
2		0		2		0		2		0		2		0
2		0		2		0		2		0		2		0
2		0		2		0		2		0		2		0
2		0		3		0		3		1		2		0
3		1		3		0		3		1		2		0
3		1		3		0		3		1		2		0
4		0		3		0		3		1		2		0
6		1		3		0		3		1		2		0
8		1		4		0		3		1		2		0
10		1		4		0		3		1		2		0
10		1		5		1		3		0		2		0
15		1		5		1		3		0		2		0
15		1		5		0		3		0		2		0
20		1		6		0		3		0		3		1
21		1		7		1		3		0		3		1
22		1		9		1		4		1		3		1
22		1		9		1		4		0		3		1
23		1		9		1		5		0		3		1
25		1		18		1		8		1		4		1
25		1		20		1		10		1		4		1
26		1		20		1		12		1		5		1
26		1		21		1		15		1		5		1
30		1		24		1		16		1		6		1
2	0			2	0			2	0			2	0
2	0			2	0			2	0			2	0
3	0			3	1			3	0			3	0
3	1			3	1			3	1			3	1
4	0			8	1			4	0			4	0
4	0			8	1			4	0			4	0
8	1			8	1			8	1			8	1
9	1			9	1			9	1			9	1
10	1			11	1			10	1			10	1
11	1			11	1			11	1			11	1
12	1			11	1			12	1			12	1
13	1			12	1			13	1			13	1
13	1			12	1			13	1			13	1
14	1			12	1			14	1			14	1
14	1			12	1			14	1			14	1
16	1			13	1			16	1			16	1
16	1			14	1			16	1			16	1
17	1			14	1			17	1			17	1
17	1			14	1			17	1			17	1
17	1			15	1			17	1			17	1
18	1			16	1			18	1			18	1
19	1			16	1			19	1			19	1
21	1			18	1			21	1			21	1
22	1			18	1			22	1			22	1
28	1			19	1			28	1			28	1
2		1		2		0		2		0		2		0
2		0		2		0		2		0		2		0
2		0		2		0		2		0		2		0
2		0		2		0		2		0		2		0
2		0		3		1		2		1		2		0
2		0		3		0		3		1		2		0
2		0		3		0		3		1		2		0
4		0		4		0		3		1		2		0
4		0		7		0		4		1		2		0
8		1		8		1		4		1		2		0
8		0		10		1		4		1		3		1
9		0		12		1		4		0		3		0
10		1		12		1		5		1		4		1
13		1		13		1		6		1		4		1
19		1		13		1		6		0		4		1
20		1		14		1		6		0		4		1
21		1		15		1		8		1		4		1
22		1		15		1		8		0		4		0
22		1		15		1		8		0		5		0
22		1		16		1		10		1		7		1
24		1		16		1		10		1		8		0
26		1		17		1		14		1		8		0
28		1		17		1		16		1		15		1
28		1		18		1		18		1		18		1
29		1		18		1		21		1		19		1
2	0			2	0			2	0			2	0
2	0			2	0			2	0			2	0
2	0			2	0			2	0			2	0
3	0			3	0			3	0			3	0
3	0			3	0			3	0			3	0
4	0			4	0			4	0			4	0
8	1			8	1			8	1			8	1
10	1			10	1			10	1			10	1
11	1			11	1			11	1			11	1
13	1			13	1			13	1			13	1
13	1			13	1			13	1			13	1
13	1			13	1			13	1			13	1
15	1			15	1			15	1			15	1
15	1			15	1			15	1			15	1
15	1			15	1			15	1			15	1
16	1			16	1			16	1			16	1
16	1			16	1			16	1			16	1
16	1			16	1			16	1			16	1
16	1			16	1			16	1			16	1
17	1			17	1			17	1			17	1
18	1			18	1			18	1			18	1
19	1			19	1			19	1			19	1
19	1			19	1			19	1			19	1
20	1			20	1			20	1			20	1
22	1			22	1			22	1			22	1
2		0		2		0		2		0		2		0
2		0		3		0		2		0		2		0
2		0		3		0		2		0		2		0
2		0		4		0		2		0		2		0
2		0		6		1		2		0		2		0
2		0		7		1		3		0		2		0
2		0		9		1		3		0		2		0
3		0		10		1		3		0		2		0
3		0		10		1		3		0		3		1
13		1		10		0		3		0		3		1
16		1		11		1		3		0		3		1
17		1		11		1		3		0		3		1
17		1		12		1		3		1		3		1
20		1		13		1		4		1		3		1
21		1		13		1		4		1		3		0
21		1		13		1		4		1		4		1
22		1		13		1		4		1		4		1
22		1		15		1		5		1		4		1
22		1		16		1		6		1		4		1
25		1		16		1		10		1		4		1
25		1		16		1		10		1		5		1
26		1		17		1		13		1		5		1
27		1		18		1		13		1		5		1
27		1		19		1		14		1		5		1
31		1		22		1		16		1		22		1
