# Supplementary material for: Bacterial diet affects the age-dependent decline of associative learning in Caenorhabditis elegans
Source: eLife. 2023 May 30;12:e81418. doi: 10.7554/eLife.81418 (PMC10229132; doi:10.7554/eLife.81418)
Supplement: Figure 4—source data 2. [file elife-81418-fig4-data2.xlsx]

## Sheet: Sheet1
Source data for Figure 4B
Day1	Day5_E. coli	Day5_Lb. reuteri	Day5_P. pentosaceus	Day5_Lb. plantarum	Day5_Lb. rhamnosus
103	62	106	69	66	92
118	74	80	60	62	98
110	64	119	70	71	102
115	75	122	78	64	71
101	71	128	89	74	90
122	59	125	83	69	83
121	57	123	67	91	101
112	56	102	82	83	88
107	69	116	72	80	98
117	80	140	79	83	96
116	66	83	75	83	96
111	66	100	64	90	109
109	45	87	71	75	106
120	78	108	75	82	98
113	69	106	87	54	109
122	74	93	85	48	107
115	75	97	87	89	103
112	60	75	95	82	117
129	53	100	82	88	107
111	74	98	88	82	103
83	81	90	85	80	73
92	96	87	81	63	81
98	86	92	80	98	113
100	100	87	70	92	100
91	96	95	75	94	107
96	103	77	81	81	106
85	91	89	84	80	109
94	109	88	92	93	108
97	115	78	53	102	103
117	76	82	90	105	91
72	76
72	77
88	97
93	74
102	107
105	109
95	84
96	87
99	98
85	79
79	95
82	97
94	108
96	79
95	106
93	80
92	84
97	83
99	88
99	116
87	61
100	72
101	92
88	59
97	67
110	42
102	60
104	25
105	81
105	63
92
94
104
79
113
104
106
111
104
107
97
99
104
116
91
94
106
105
119
109
104
118
111
115
118
94
111
112
113
111
