# Supplementary material for: Bacterial diet affects the age-dependent decline of associative learning in Caenorhabditis elegans
Source: eLife. 2023 May 30;12:e81418. doi: 10.7554/eLife.81418 (PMC10229132; doi:10.7554/eLife.81418)
Supplement: Figure 4—source data 3. [file elife-81418-fig4-data3.xlsx]

## Sheet: Fig4C
Source data for Figure 4C
Day1	Day5_E. coli	Day5_P. pentosaceus	Day5_Lb. reuteri	Day5_Lb. plantarum	Day5_Lb. rhamnosus
57.5529	38.7413	20.1952	26.9085	20.8702	19.39
39.511	58.4623	34.405	28.3059	1.06165	27.4155
47.7733	43.7887	39.8135	27.1071	16.7975	20.4681
42.789	28.7647	34.5234	28.0011	20.273	24.8751
50.0936	34.8808	35.6723	21.7481	16.5419	22.438
40.302	41.8917	45.8011	34.9631	14.5462	17.7704
45.9751	25.4962	33.83	18.6929	9.11201	19.9031
45.1197	25.3941	28.6548	11.5097	19.5865	21.72
50.7948	24.6955	32.4926	26.0336	15.7112	20.2268
22.1031	25.9048	28.7145	29.7334	20.568	27.7336
22.5813	24.7617	35.0657	29.1149	21.5907	29.1866
44.8785	28.2878	41.095	33.4044	19.072	19.6658
59.271	51.5237	37.1654	26.7313	12.8187	17.7951
42.8088	23.2309	43.7274	21.8857	10	9.89008
44.7596	21.2661	30.7191	25.4192	14.8554	9.19715
26.9091	22.954	46.1211	26.5583	14.5303	19.5554
47.5478	26.6907	32.1583	20.0615	7.30492	10.7746
47.5199	19.0751	34.2809	27.1515	5.83627	19.4877
43.3692	31.4181	34.7009	28.9521	15.9821	19.3733
47.8723	39.947	37.0611	28.3998	21.8962	22.7207
41.6299	22.4778	31.7755	17.1875	17.7554	15.1328
33.1718	23.7777	26.0849	21.3522	10.433	10.9095
32.8905	32.0206	37.5296	32.9081	11.358	29.1563
28.5466	19.4667	26.8118	35.9227	1.42997	21.8876
40.0193	21.6896	37.9535	39.5394	19.3871	27.3674
47.3543	20.2873	19.1539	41.661	4.75275	23.1948
44.9356	29.2496	45.1731	9.69248	3.95033	17.3382
20.6139	35.2767	38.7073	35.3509	5.23882	14.9513
34.1977	31.0194	32.79	18.8576		20.768
46.8817	16.1399	44.84	32.9512		14.17
35.2473	19.2775
51.537	34.7262
37.9065	47.1448
57.8961	34.2832
58.1981	26.8957
56.5735	32.6061
50.7236
50.187
47.5182
43.5339
