# Supplementary material for: Bacterial diet affects the age-dependent decline of associative learning in Caenorhabditis elegans
Source: eLife. 2023 May 30;12:e81418. doi: 10.7554/eLife.81418 (PMC10229132; doi:10.7554/eLife.81418)
Supplement: Figure 5—source data 1. [file elife-81418-fig5-data1.xlsx]

## Sheet: Fig5A
Source data for Figure 5A
Condition	Performance index
D1	0.805556
D1	0.606452
D1	0.672897
D1	0.621849
D1	0.814103
D1	0.78
D1	0.54918
D5_E. coli	0.145833
D5_E. coli	0.0211268
D5_E. coli	0.0961538
D5_E. coli	0.0613027
D5_E. coli	0.130435
D5_E. coli	0.09375
D5_E. coli	0.0625
D5_E. coli	0.0839161
D5_Lb. reuteri	0.612245
D5_Lb. reuteri	0.636364
D5_Lb. reuteri	0.640625
D5_Lb. reuteri	0.576923
D5_Lb. reuteri	0.71875
D5_Lb. reuteri	0.772152
D5_Lb. reuteri	0.625668
D5_Lb. reuteri	0.75
D5_L.reuteri -> E.coli	0.553333
D5_L.reuteri -> E.coli	0.137097
D5_L.reuteri -> E.coli	0.56213
D5_L.reuteri -> E.coli	0.527473
D5_L.reuteri -> E.coli	0.724638
D5_L.reuteri -> E.coli	0.815126
D5_L.reuteri -> E.coli	0.514793
D5_L.reuteri -> E.coli	0.482927
D5_E.coli -> L.reuteri	0.328571
D5_E.coli -> L.reuteri	0.342105
D5_E.coli -> L.reuteri	0.24026
D5_E.coli -> L.reuteri	0.283525
D5_E.coli -> L.reuteri	0.16
D5_E.coli -> L.reuteri	0.0827068
D5_E.coli -> L.reuteri	0.0268456
D5_E.coli -> L.reuteri	0.0977778
D5_E.coli -> L.reuteri	0.135
