# Supplementary material for: Bacterial diet affects the age-dependent decline of associative learning in Caenorhabditis elegans
Source: eLife. 2023 May 30;12:e81418. doi: 10.7554/eLife.81418 (PMC10229132; doi:10.7554/eLife.81418)
Supplement: Figure 5—source data 2. [file elife-81418-fig5-data2.xlsx]

## Sheet: Fig5B
Source data for Figure 5B
Sample	Performance_index
D1	0.71875
D1	0.919118
D1	0.808219
D1	0.825
D1	0.853448
D1	0.846774
D1	0.921569
D1	0.853448
D1	0.846774
D1	0.921569
D1	0.699029
D1	0.708738
D1	0.641304
D1	0.936782
D1	0.711656
D1	0.71875
D1	0.919118
D1	0.808219
D1	0.825
D1	0.735294
D1	0.430233
D1	0.410256
D5	0.285714
D5	0.103448
D5	0.230769
D5	0.27451
D5	0.241758
D5	0.390805
D5	0.344262
D5	0.285714
D5	0.103448
D5	0.230769
D5	0.2
D5	0.666667
D5	0.353659
D5	0.301587
D5	0.385093
D5	0.509091
D5	0.27451
D5	0.241758
D5	0.390805
D5	0.344262
D5	0.0909091
D5	0.322034
D5	0.34375
D5_65C1h	0.470588
D5_65C1h	0.0980392
D5_65C1h	0.0857143
D5_65C1h	0.275862
D5_65C1h	0.32
D5_65C1h	0.393939
D5_65C1h	0.272059
D5_65C1h	0.280488
D5_65C1h	0.452381
D5_65C1h	0.181818
D5_65C1h	0.470588
D5_65C1h	0.0980392
D5_65C1h	0.0857143
D5_65C1h	0.208333
D5_65C1h	0.229167
D5_65C1h	0.22619
D5_65C1h_crush	0.419355
D5_65C1h_crush	0.4375
D5_65C1h_crush	0.813953
D5_65C1h_crush	0.684211
D5_65C1h_crush	0.37037
D5_100C10min	0.689655
D5_100C10min	0.421687
D5_100C10min	0.596899
D5_100C10min	0.626667
D5_100C10min	0.213675
D5_100C10min	0.512658
D5_100C10min	0.378571
D5_100C10min	0.651852
D5_100C10min	0.638298
D5_100C10min	0.608696
D5_100C10min	0.615385
D5	0.494118
D5	0.693878
D5	0.878049
D5	0.727273
D5	0.793103
D5	0.90625
D5	0.823529
D5	0.793103
D5	0.494118
D5	0.693878
D5	0.878049
D5	0.727273
D5	0.48
D5	0.47541
D5	0.5
D5_65C1h	0.87037
D5_65C1h	0.771739
D5_65C1h	0.920792
D5_65C1h	0.728395
D5_65C1h	0.804878
D5_65C1h	0.888889
D5_65C1h	0.96
D5_65C1h	0.909091
D5_65C1h	0.761905
D5_65C1h	0.788462
D5_65C1h	0.757576
D5_65C1h	0.87037
D5_65C1h	0.771739
D5_65C1h	0.920792
D5_65C1h	0.728395
D5_65C1h	0.804878
D5_65C1h	0.888889
D5_65C1h_crush	0.787234
D5_65C1h_crush	0.864583
D5_65C1h_crush	0.896175
D5_65C1h_crush	0.56
D5_65C1h_crush	0.642857
D5_65C1h_crush	0.844444
D5_65C1h_crush	0.607143
D5_65C1h_crush	0.787234
D5_65C1h_crush	0.864583
D5_65C1h_crush	0.896175
D5_65C1h_crush	0.56
D5_65C1h_crush	0.642857
D5_65C1h_crush	0.844444
D5_65C1h_crush	0.607143
D5_100C10min	0.964286
D5_100C10min	0.973684
D5_100C10min	0.944444
D5_100C10min	0.736842
D5_100C10min	0.906977
D5_100C10min	0.947368
D5_100C10min	0.857143
D5_100C10min	0.5
D5_100C10min	1
D5_100C10min	0.775
D5_100C10min	0.888889
D5_100C10min	0.666667
D5_100C10min	0.95
D5_100C10min	0.647059
D5_100C10min	0.913043
D5_100C10min	0.8
D5_100C10min	0.648649
D5_100C10min	0.954545
D5_100C10min	0.849057
D5_100C10min	0.734375
D5_100C10min	0.892857
D5_100C10min	0.86
D5_100C10min	0.660377
D5_100C10min	0.774648
D5_100C10min	0.723404
