# Supplementary material for: Bacterial diet affects the age-dependent decline of associative learning in Caenorhabditis elegans
Source: eLife. 2023 May 30;12:e81418. doi: 10.7554/eLife.81418 (PMC10229132; doi:10.7554/eLife.81418)
Supplement: Figure 5—source data 3. [file elife-81418-fig5-data3.xlsx]

## Sheet: Fig5C
Source data for Figure 5C
Sample	Performance_index
D1	0.490566
D1	0.59596
D1	0.2125
D1	0.508982
D1	0.80531
D1	0.84106
D1	0.902174
D1	0.663366
D1	0.758929
D1	0.681159
D1	0.732759
D1	0.747253
D1	0.496454
D1	0.72549
D1	0.748538
D5_E.coli100	0.0457516
D5_E.coli100	0.100629
D5_E.coli100	0.267176
D5_E.coli100	0.0654206
D5_E.coli100	0.182927
D5_E.coli100	0.060241
D5_E.coli100	0.0451128
D5_E.coli100	0.356688
D5_E.coli100	0.304348
D5_E.coli100	0.2
D5_E.coli100	0.298969
D5_E.coli100	0.372263
D5_E.coli100	0.362319
D5_E.coli50_Lb.reuteri50	0.103448
D5_E.coli50_Lb.reuteri50	0.0731707
D5_E.coli50_Lb.reuteri50	0.213235
D5_E.coli50_Lb.reuteri50	0.230159
D5_E.coli33_Lb.reuteri67	0.144578
D5_E.coli33_Lb.reuteri67	0.116667
D5_E.coli33_Lb.reuteri67	0.232323
D5_E.coli33_Lb.reuteri67	0.12931
D5_E.coli33_Lb.reuteri67	0.190141
D5_E.coli33_Lb.reuteri67	0.164835
D5_Lb.reuteri100	0.754902
D5_Lb.reuteri100	0.763441
D5_Lb.reuteri100	0.703704
D5_Lb.reuteri100	0.868687
D5_Lb.reuteri100	0.752688
D5_Lb.reuteri100	0.798077
D5_Lb.reuteri100	0.752294
D5_Lb.reuteri100	0.788889
D5_Lb.reuteri100	0.586667
D5_Lb.reuteri100	0.862745
