# Supplementary material for: Bacterial diet affects the age-dependent decline of associative learning in Caenorhabditis elegans
Source: eLife. 2023 May 30;12:e81418. doi: 10.7554/eLife.81418 (PMC10229132; doi:10.7554/eLife.81418)
Supplement: Figure 5—source data 4. [file elife-81418-fig5-data4.xlsx]

## Sheet: Fig5D
Source data for Figure 5D
Condition	Performance index
wt_D1	0.496855
wt_D1	0.357724
wt_D1	0.375758
wt_D1	0.876761
wt_D1	0.64
wt_D1	0.785047
wt_D1	0.895288
wt_D1	0.70297
wt_D1	0.8
wt_D1	0.89071
wt_D1	0.805755
wt_D1	0.834646
wt_D1	0.341615
wt_D1	0.563636
wt_D1	0.627551
wt_D1	0.718519
wt_D1	0.348624
wt_D5_E.coli	0.336735
wt_D5_E.coli	0.309091
wt_D5_E.coli	0.333333
wt_D5_E.coli	0.490196
wt_D5_E.coli	0.510791
wt_D5_E.coli	0.5
wt_D5_E.coli	0.396552
wt_D5_E.coli	0.28125
wt_D5_E.coli	0.238411
wt_D5_Lb.reuteri	0.802326
wt_D5_Lb.reuteri	0.886076
wt_D5_Lb.reuteri	0.826923
wt_D5_Lb.reuteri	0.542373
wt_D5_Lb.reuteri	0.714286
wt_D5_Lb.reuteri	0.521472
wt_D5_Lb.reuteri	0.733333
wt_D5_Lb.reuteri	0.633333
wt_D5_Lb.reuteri	0.657143
wt_D5_E.coli_Lb.reuteriSmell	0.218182
wt_D5_E.coli_Lb.reuteriSmell	0.244681
wt_D5_E.coli_Lb.reuteriSmell	0.408
wt_D5_E.coli_Lb.reuteriSmell	0.366667
wt_D5_E.coli_Lb.reuteriSmell	0.531915
wt_D5_E.coli_Lb.reuteriSmell	0.366412
wt_D5_E.coli_Lb.reuteriSmell	0.395161
wt_D5_E.coli_Lb.reuteriSmell	0.415385
wt_D5_Lb.reuteri_E.coliSmell	0.634146
wt_D5_Lb.reuteri_E.coliSmell	0.255319
wt_D5_Lb.reuteri_E.coliSmell	0.742857
wt_D5_Lb.reuteri_E.coliSmell	0.741935
wt_D5_Lb.reuteri_E.coliSmell	0.722772
wt_D5_Lb.reuteri_E.coliSmell	0.704225
wt_D5_Lb.reuteri_E.coliSmell	0.381818
wt_D5_Lb.reuteri_E.coliSmell	0.508197
wt_D5_Lb.reuteri_E.coliSmell	0.527778
