# Supplementary material for: Bacterial diet affects the age-dependent decline of associative learning in Caenorhabditis elegans
Source: eLife. 2023 May 30;12:e81418. doi: 10.7554/eLife.81418 (PMC10229132; doi:10.7554/eLife.81418)
Supplement: Figure 7—figure supplement 1—source data 2. [file elife-81418-fig7-figsupp1-data2.xlsx]

## Sheet: Fig7-S1
Source data 2 for Figure 7-Figure supplement 1B
Strain	Condition	Performance_index
N2	wt_D1	0.542056
N2	wt_D1	0.867347
N2	wt_D1	0.855856
N2	wt_D1	0.741379
N2	wt_D1	0.589041
N2	wt_D1	0.659574
DA1116	eat-2_D1	0.168067
DA1116	eat-2_D1	0.0571429
DA1116	eat-2_D1	0.138889
DA1116	eat-2_D1	0.251748
DA1116	eat-2_D1	0.0807018
DA1116	eat-2_D1	0.0729483
N2	wt_D5_E.coli	0.330275
N2	wt_D5_E.coli	0.162963
N2	wt_D5_E.coli	0.215517
N2	wt_D5_E.coli	0.229358
N2	wt_D5_E.coli	0.104575
DA1116	eat-2_D5_E.coli	0.236641
DA1116	eat-2_D5_E.coli	0.28
DA1116	eat-2_D5_E.coli	0.216216
DA1116	eat-2_D5_E.coli	0.256579
DA1116	eat-2_D5_E.coli	0.125
