# Supplementary material for: Bacterial diet affects the age-dependent decline of associative learning in Caenorhabditis elegans
Source: eLife. 2023 May 30;12:e81418. doi: 10.7554/eLife.81418 (PMC10229132; doi:10.7554/eLife.81418)
Supplement: Figure 7—source data 1. [file elife-81418-fig7-data1.xlsx]

## Sheet: Fig7A
Source data for Figure 7A
Strain	Condition	Performance index
N2	wt_D1	0.785047
N2	wt_D1	0.683544
N2	wt_D1	0.707547
N2	wt_D1	0.714286
N2	wt_D1	0.578125
N2	wt_D1	0.662651
N2	wt_D1	0.640449
N2	wt_D1	0.688889
N2	wt_D1	0.72
N2	wt_D1	0.793651
N2	wt_D1	0.827068
N2	wt_D1	0.627273
N2	wt_D1	0.789116
N2	wt_D1	0.735683
N2	wt_D1	0.71831
N2	wt_D1	0.519685
N2	wt_D1	0.706806
N2	wt_D1	0.559006
N2	wt_D1	0.610465
N2	wt_D1	0.696721
N2	wt_D1	0.838983
N2	wt_D1	0.723301
N2	wt_D1	0.851562
N2	wt_D1	0.677419
N2	wt_D1	0.728261
N2	wt_D1	0.755682
N2	wt_D1	0.748503
N2	wt_D1	0.71345
N2	wt_D1	0.67033
N2	wt_D1	0.78
N2	wt_D1	0.371681
N2	wt_D1	0.727679
N2	wt_D1	0.57513
N2	wt_D1	0.760417
N2	wt_D1	0.641221
N2	wt_D1	0.635556
N2	wt_D1	0.529915
N2	wt_D1	0.506912
N2	wt_D1	0.48855
N2	wt_D1	0.690217
N2	wt_D1	0.531429
N2	wt_D1	0.675556
N2	wt_D1	0.670659
N2	wt_D1	0.652941
N2	wt_D1	0.8
N2	wt_D1	0.84
N2	wt_D1	0.873874
N2	wt_D1	0.892157
N2	wt_D1	0.808917
N2	wt_D5_E.coli	0.246753
N2	wt_D5_E.coli	0.217391
N2	wt_D5_E.coli	0.1875
N2	wt_D5_E.coli	0.586207
N2	wt_D5_E.coli	0.253968
N2	wt_D5_E.coli	0.342593
N2	wt_D5_E.coli	0.393617
N2	wt_D5_E.coli	0.402299
N2	wt_D5_E.coli	0.275362
N2	wt_D5_E.coli	0.201835
N2	wt_D5_E.coli	0.263158
N2	wt_D5_E.coli	0.231579
N2	wt_D5_E.coli	0.280702
N2	wt_D5_E.coli	0.233766
N2	wt_D5_E.coli	0.276786
N2	wt_D5_E.coli	0.193452
N2	wt_D5_E.coli	0.351145
N2	wt_D5_E.coli	0.309091
N2	wt_D5_E.coli	0.326087
N2	wt_D5_E.coli	0.0583333
N2	wt_D5_E.coli	0.148515
N2	wt_D5_E.coli	0.269461
N2	wt_D5_E.coli	0.282051
N2	wt_D5_E.coli	0.163043
N2	wt_D5_E.coli	0.116279
N2	wt_D5_E.coli	0.0903955
N2	wt_D5_E.coli	0.102804
N2	wt_D5_E.coli	0.247368
N2	wt_D5_E.coli	0.218543
N2	wt_D5_E.coli	0.254386
N2	wt_D5_E.coli	0.385185
N2	wt_D5_E.coli	0.260274
N2	wt_D5_E.coli	0.272727
N2	wt_D5_E.coli	0.296296
N2	wt_D5_E.coli	0.358025
N2	wt_D5_E.coli	0.364238
N2	wt_D5_E.coli	0.432161
N2	wt_D5_E.coli	0.291925
N2	wt_D5_Lb.reuteri	0.75
N2	wt_D5_Lb.reuteri	0.693069
N2	wt_D5_Lb.reuteri	0.810127
N2	wt_D5_Lb.reuteri	0.887324
N2	wt_D5_Lb.reuteri	0.730769
N2	wt_D5_Lb.reuteri	0.777778
N2	wt_D5_Lb.reuteri	0.885714
N2	wt_D5_Lb.reuteri	0.708861
N2	wt_D5_Lb.reuteri	0.9
N2	wt_D5_Lb.reuteri	0.819444
N2	wt_D5_Lb.reuteri	0.803571
N2	wt_D5_Lb.reuteri	0.864407
N2	wt_D5_Lb.reuteri	0.846154
N2	wt_D5_Lb.reuteri	0.805
N2	wt_D5_Lb.reuteri	0.853659
N2	wt_D5_Lb.reuteri	0.80786
N2	wt_D5_Lb.reuteri	0.702222
N2	wt_D5_Lb.reuteri	0.826316
N2	wt_D5_Lb.reuteri	0.76087
N2	wt_D5_Lb.reuteri	0.795276
N2	wt_D5_Lb.reuteri	0.853147
N2	wt_D5_Lb.reuteri	0.738806
N2	wt_D5_Lb.reuteri	0.670157
N2	wt_D5_Lb.reuteri	0.834951
N2	wt_D5_Lb.reuteri	0.65812
N2	wt_D5_Lb.reuteri	0.59375
N2	wt_D5_Lb.reuteri	0.647059
N2	wt_D5_Lb.reuteri	0.727273
N2	wt_D5_Lb.reuteri	0.553846
NUJ69	kmo-1_D1	0.767677
NUJ69	kmo-1_D1	0.738739
NUJ69	kmo-1_D1	0.602564
NUJ69	kmo-1_D1	0.76
NUJ69	kmo-1_D1	0.682051
NUJ69	kmo-1_D1	0.395939
NUJ69	kmo-1_D1	0.483871
NUJ69	kmo-1_D1	0.322222
NUJ69	kmo-1_D1	0.642336
NUJ69	kmo-1_D1	0.754545
NUJ69	kmo-1_D1	0.723077
NUJ69	kmo-1_D1	0.727273
NUJ69	kmo-1_D1	0.790698
NUJ69	kmo-1_D1	0.855932
NUJ69	kmo-1_D1	0.913386
NUJ69	kmo-1_D1	0.854167
NUJ69	kmo-1_D1	0.795031
NUJ69	kmo-1_D5_E.coli	0.44898
NUJ69	kmo-1_D5_E.coli	0.416667
NUJ69	kmo-1_D5_E.coli	0.133333
NUJ69	kmo-1_D5_E.coli	0.177778
NUJ69	kmo-1_D5_E.coli	0.363636
NUJ69	kmo-1_D5_E.coli	0.344086
NUJ69	kmo-1_D5_E.coli	0.26
NUJ69	kmo-1_D5_E.coli	0.204819
NUJ69	kmo-1_D5_E.coli	0.25974
NUJ69	kmo-1_D5_E.coli	0.252525
NUJ69	kmo-1_D5_E.coli	0.24
NUJ69	kmo-1_D5_E.coli	0.25
NUJ69	kmo-1_D5_Lb.reuteri	0.640138
NUJ69	kmo-1_D5_Lb.reuteri	0.757848
NUJ69	kmo-1_D5_Lb.reuteri	0.839357
NUJ69	kmo-1_D5_Lb.reuteri	0.747748
NUJ69	kmo-1_D5_Lb.reuteri	0.604317
NUJ69	kmo-1_D5_Lb.reuteri	0.701149
NUJ69	kmo-1_D5_Lb.reuteri	0.701754
NUJ69	kmo-1_D5_Lb.reuteri	0.716981
NUJ69	kmo-1_D5_Lb.reuteri	0.591837
NUJ69	kmo-1_D5_Lb.reuteri	0.464286
NUJ71	nkat-1_D1	0.643172
NUJ71	nkat-1_D1	0.585526
NUJ71	nkat-1_D1	0.75969
NUJ71	nkat-1_D1	0.790323
NUJ71	nkat-1_D1	0.59292
NUJ71	nkat-1_D1	0.616327
NUJ71	nkat-1_D1	0.584665
NUJ71	nkat-1_D1	0.472603
NUJ71	nkat-1_D1	0.598214
NUJ71	nkat-1_D1	0.565217
NUJ71	nkat-1_D1	0.817308
NUJ71	nkat-1_D1	0.747748
NUJ71	nkat-1_D1	0.695312
NUJ71	nkat-1_D1	0.846154
NUJ71	nkat-1_D1	0.902439
NUJ71	nkat-1_D1	0.980198
NUJ71	nkat-1_D1	0.953271
NUJ71	nkat-1_D1	0.915493
NUJ71	nkat-1_D5_E.coli	0.246377
NUJ71	nkat-1_D5_E.coli	0.214286
NUJ71	nkat-1_D5_E.coli	0.212121
NUJ71	nkat-1_D5_E.coli	0.283333
NUJ71	nkat-1_D5_E.coli	0.458599
NUJ71	nkat-1_D5_E.coli	0.253333
NUJ71	nkat-1_D5_E.coli	0.495935
NUJ71	nkat-1_D5_E.coli	0.462585
NUJ71	nkat-1_D5_E.coli	0.485981
NUJ71	nkat-1_D5_E.coli	0.402439
NUJ71	nkat-1_D5_E.coli	0.491071
NUJ71	nkat-1_D5_Lb.reuteri	0.748954
NUJ71	nkat-1_D5_Lb.reuteri	0.75641
NUJ71	nkat-1_D5_Lb.reuteri	0.759259
NUJ71	nkat-1_D5_Lb.reuteri	0.860795
NUJ71	nkat-1_D5_Lb.reuteri	0.805714
NUJ71	nkat-1_D5_Lb.reuteri	0.780142
NUJ71	nkat-1_D5_Lb.reuteri	0.889535
NUJ71	nkat-1_D5_Lb.reuteri	0.901961
NUJ71	nkat-1_D5_Lb.reuteri	0.660377
NUJ71	nkat-1_D5_Lb.reuteri	0.846715
NUJ71	nkat-1_D5_Lb.reuteri	0.903226
NUJ71	nkat-1_D5_Lb.reuteri	0.878788
CF1038	daf-16_D1	0.580645
CF1038	daf-16_D1	0.442478
CF1038	daf-16_D1	0.633803
CF1038	daf-16_D1	0.704918
CF1038	daf-16_D1	0.413333
CF1038	daf-16_D1	0.432624
CF1038	daf-16_D1	0.713656
CF1038	daf-16_D1	0.608974
CF1038	daf-16_D1	0.536232
CF1038	daf-16_D1	0.622727
CF1038	daf-16_D1	0.664336
CF1038	daf-16_D1	0.726444
CF1038	daf-16_D1	0.623188
CF1038	daf-16_D1	0.635688
CF1038	daf-16_D1	0.710884
CF1038	daf-16_D5_E.coli	0.164062
CF1038	daf-16_D5_E.coli	0.109244
CF1038	daf-16_D5_E.coli	0.233333
CF1038	daf-16_D5_E.coli	0.269231
CF1038	daf-16_D5_E.coli	0.166667
CF1038	daf-16_D5_E.coli	0.0472973
CF1038	daf-16_D5_E.coli	0.135417
CF1038	daf-16_D5_E.coli	0.184211
CF1038	daf-16_D5_E.coli	0.328947
CF1038	daf-16_D5_E.coli	0.124183
CF1038	daf-16_D5_E.coli	0.0855615
CF1038	daf-16_D5_E.coli	0.169014
CF1038	daf-16_D5_E.coli	0.112745
CF1038	daf-16_D5_E.coli	0.12
CF1038	daf-16_D5_E.coli	0.20339
CF1038	daf-16_D5_E.coli	0.149194
CF1038	daf-16_D5_E.coli	0.108911
CF1038	daf-16_D5_Lb.reuteri	0.458333
CF1038	daf-16_D5_Lb.reuteri	0.516484
CF1038	daf-16_D5_Lb.reuteri	0.752941
CF1038	daf-16_D5_Lb.reuteri	0.677966
CF1038	daf-16_D5_Lb.reuteri	0.0289855
CF1038	daf-16_D5_Lb.reuteri	0.121212
CF1038	daf-16_D5_Lb.reuteri	0.0185185
CF1038	daf-16_D5_Lb.reuteri	0.3125
CF1038	daf-16_D5_Lb.reuteri	0.522388
CF1038	daf-16_D5_Lb.reuteri	0.439024
CF1038	daf-16_D5_Lb.reuteri	0.670588
CF1038	daf-16_D5_Lb.reuteri	0.432624
CF1038	daf-16_D5_Lb.reuteri	0.350365
CF1038	daf-16_D5_Lb.reuteri	0.203762
CF1038	daf-16_D5_Lb.reuteri	0.434978
CF1038	daf-16_D5_Lb.reuteri	0.477941
CF1038	daf-16_D5_Lb.reuteri	0.5
CF1038	daf-16_D5_Lb.reuteri	0.248792
CF1038	daf-16_D5_Lb.reuteri	0.1571
CF1038	daf-16_D5_Lb.reuteri	0.341121
CF1038	daf-16_D5_Lb.reuteri	0.365672
CF1038	daf-16_D5_Lb.reuteri	0.406667
