# Supplementary material for: Bacterial diet affects the age-dependent decline of associative learning in Caenorhabditis elegans
Source: eLife. 2023 May 30;12:e81418. doi: 10.7554/eLife.81418 (PMC10229132; doi:10.7554/eLife.81418)
Supplement: Figure 7—source data 2. [file elife-81418-fig7-data2.xlsx]

## Sheet: Fig7B
Source data for Figure 7B
Strain	Condition	Section 1	Section 2	Section 3	Section 4	Section 5	Section 6	Section 7	Section 8
N2	wt_D1	0	0.0373832	0.0280374	0.0186916	0.0373832	0.0934579	0.158879	0.626168
N2	wt_D1	0.0126582	0.0126582	0.0379747	0.0379747	0.101266	0.113924	0.21519	0.468354
N2	wt_D1	0.0235849	0.0141509	0.0330189	0.0283019	0.0613208	0.132075	0.254717	0.45283
N2	wt_D1	0.0357143	0	0.0357143	0.047619	0.0833333	0.0833333	0.22619	0.488095
N2	wt_D1	0.015625	0.015625	0.03125	0.015625	0.15625	0.1875	0.171875	0.40625
N2	wt_D1	0	0.0240964	0.0481928	0.0481928	0.0963855	0.120482	0.240964	0.421687
N2	wt_D1	0.0337079	0.0337079	0.0337079	0.101124	0.0674157	0.0898876	0.235955	0.404494
N2	wt_D1	0.0444444	0.0222222	0.0666667	0.0666667	0.0888889	0.0222222	0.0888889	0.6
N2	wt_D1	0.1	0.02	0.02	0	0.06	0.08	0.18	0.54
N2	wt_D1	0.047619	0.015873	0	0.0793651	0	0.0634921	0.142857	0.650794
N2	wt_D1	0.0300752	0.0150376	0.0300752	0.0075188	0.0225564	0.0676692	0.112782	0.714286
N2	wt_D1	0.0727273	0.0545455	0.0363636	0.0363636	0.0909091	0.0818182	0.2	0.427273
N2	wt_D1	0.0136054	0	0.0136054	0.0408163	0.047619	0.0952381	0.238095	0.55102
N2	wt_D1	0.00440529	0.00440529	0.00440529	0.0748899	0.0881057	0.0881057	0.140969	0.594714
N2	wt_D1	0.0234742	0.0234742	0.0187793	0.0234742	0.084507	0.107981	0.150235	0.568075
N2	wt_D1	0.0944882	0.023622	0.0314961	0.0708661	0.110236	0.149606	0.11811	0.401575
N2	wt_D1	0.0157068	0.026178	0.0157068	0.052356	0.052356	0.13089	0.188482	0.518325
N2	wt_D1	0.0621118	0.0186335	0.0310559	0.0869565	0.118012	0.124224	0.068323	0.490683
N2	wt_D1	0	0.0116279	0.0348837	0.0697674	0.0755814	0.197674	0.255814	0.354651
N2	wt_D1	0.00819672	0.0204918	0.0204918	0.057377	0.0655738	0.131148	0.127049	0.569672
N2	wt_D1	0	0	0.0338983	0	0	0.127119	0.110169	0.728814
N2	wt_D1	0.0145631	0.00485437	0.0242718	0.0533981	0.0631068	0.116505	0.218447	0.504854
N2	wt_D1	0	0.0117188	0.0195312	0.0234375	0.0546875	0.0390625	0.144531	0.707031
N2	wt_D1	0.0875576	0.0829493	0.0506912	0.0138249	0.0414747	0.0460829	0.119816	0.557604
N2	wt_D1	0.0253623	0.0253623	0.00724638	0.0144928	0.0652174	0.134058	0.195652	0.532609
N2	wt_D1	0.0113636	0.0170455	0.0227273	0.0284091	0.0454545	0.119318	0.227273	0.528409
N2	wt_D1	0.011976	0.0299401	0.0359281	0.0299401	0.0359281	0.107784	0.251497	0.497006
N2	wt_D1	0.0116959	0.00584795	0.0233918	0.0175439	0.0584795	0.169591	0.233918	0.479532
N2	wt_D1	0.00549451	0.0164835	0.0274725	0.0164835	0.10989	0.153846	0.296703	0.373626
N2	wt_D1	0.04	0.02	0.03	0.02	0.04	0.06	0.1	0.68
N2	wt_D1	0.0486726	0.0840708	0.0707965	0.0884956	0.137168	0.199115	0.20354	0.168142
N2	wt_D1	0.03125	0.0625	0.0357143	0.0267857	0.0535714	0.0625	0.125	0.602679
N2	wt_D1	0.0207254	0.0777202	0.0673575	0.0673575	0.0984456	0.0932642	0.119171	0.455959
N2	wt_D1	0	0.0208333	0	0.0625	0.0729167	0.0833333	0.177083	0.583333
N2	wt_D1	0.0458015	0.0610687	0.0152672	0.0381679	0.0458015	0.152672	0.160305	0.480916
N2	wt_D5_E.coli	0	0.012987	0.038961	0.233766	0.246753	0.220779	0.181818	0.0649351
N2	wt_D5_E.coli	0.00621118	0.0248447	0.0496894	0.223602	0.285714	0.192547	0.130435	0.0869565
N2	wt_D5_E.coli	0.015625	0.0625	0.109375	0.296875	0.21875	0.109375	0.078125	0.109375
N2	wt_D5_E.coli	0.0114943	0	0.0344828	0.0804598	0.114943	0.172414	0.0804598	0.505747
N2	wt_D5_E.coli	0.015873	0.0634921	0.0634921	0.126984	0.301587	0.174603	0.174603	0.0793651
N2	wt_D5_E.coli	0.0648148	0.00925926	0.0555556	0.111111	0.287037	0.12963	0.111111	0.231481
N2	wt_D5_E.coli	0.0425532	0.0638298	0.0851064	0.0851064	0.138298	0.191489	0.12766	0.265957
N2	wt_D5_E.coli	0.045977	0.0114943	0.0114943	0.16092	0.241379	0.126437	0.149425	0.252874
N2	wt_D5_E.coli	0	0.0289855	0.0434783	0.289855	0.26087	0.101449	0.0724638	0.202899
N2	wt_D5_E.coli	0	0	0	0.293578	0.348624	0.155963	0.12844	0.0733945
N2	wt_D5_E.coli	0	0	0	0.197368	0.302632	0.236842	0.131579	0.131579
N2	wt_D5_E.coli	0	0	0.0105263	0.431579	0.231579	0.0947368	0.105263	0.126316
N2	wt_D5_E.coli	0	0	0.0175439	0.192982	0.350877	0.157895	0.245614	0.0350877
N2	wt_D5_E.coli	0	0	0.017316	0.138528	0.324675	0.285714	0.181818	0.0519481
N2	wt_D5_E.coli	0	0	0.00892857	0.169643	0.325893	0.21875	0.165179	0.111607
N2	wt_D5_E.coli	0.00595238	0.00297619	0.0327381	0.205357	0.345238	0.214286	0.133929	0.0595238
N2	wt_D5_E.coli	0	0.019084	0.0381679	0.141221	0.229008	0.221374	0.160305	0.19084
N2	wt_D5_E.coli	0	0	0.0363636	0.181818	0.236364	0.236364	0.218182	0.0909091
N2	wt_D5_E.coli	0	0	0.0543478	0.076087	0.26087	0.282609	0.211957	0.11413
N2	wt_D5_E.coli	0.00833333	0.00833333	0.0833333	0.283333	0.4	0.158333	0.0166667	0.0416667
N2	wt_D5_E.coli	0	0	0.0594059	0.267327	0.356436	0.168317	0.0792079	0.0693069
N2	wt_D5_E.coli	0.00598802	0	0.0299401	0.11976	0.365269	0.209581	0.185629	0.0838323
N2	wt_D5_E.coli	0	0	0.034188	0.153846	0.273504	0.25641	0.17094	0.111111
N2	wt_D5_E.coli	0.0652174	0.076087	0.119565	0.184783	0.26087	0.130435	0.0923913	0.0706522
N2	wt_D5_E.coli	0.00775194	0.0465116	0.116279	0.209302	0.325581	0.178295	0.0852713	0.0310078
N2	wt_D5_E.coli	0.0225989	0.0847458	0.107345	0.254237	0.322034	0.118644	0.0282486	0.0621469
N2	wt_D5_E.coli	0	0.0280374	0.0747664	0.308411	0.35514	0.130841	0.0560748	0.046729
N2	wt_D5_E.coli	0.0210526	0.0368421	0.0368421	0.205263	0.326316	0.126316	0.126316	0.121053
N2	wt_D5_E.coli	0.00662252	0.0198676	0.0264901	0.264901	0.298013	0.165563	0.10596	0.112583
N2	wt_D5_E.coli	0.00877193	0.0350877	0.0526316	0.175439	0.324561	0.149123	0.114035	0.140351
N2	wt_D5_E.coli	0	0.00740741	0.0148148	0.0962963	0.274074	0.222222	0.185185	0.2
N2	wt_D5_Lb.reuteri	0	0	0	0.0217391	0.0652174	0.163043	0.456522	0.293478
N2	wt_D5_Lb.reuteri	0.00990099	0.019802	0.00990099	0.0495049	0.0594059	0.158416	0.287129	0.405941
N2	wt_D5_Lb.reuteri	0	0.0126582	0	0.0443038	0.0379747	0.0949367	0.5	0.310127
N2	wt_D5_Lb.reuteri	0	0	0	0.0140845	0.028169	0.0704225	0.302817	0.584507
N2	wt_D5_Lb.reuteri	0	0	0	0.0384615	0.115385	0.115385	0.192308	0.538462
N2	wt_D5_Lb.reuteri	0.0555556	0	0	0	0.0555556	0.111111	0.111111	0.666667
N2	wt_D5_Lb.reuteri	0	0	0	0.0285714	0.0571429	0.0285714	0.257143	0.628571
N2	wt_D5_Lb.reuteri	0.0379747	0.0126582	0.0126582	0.0506329	0.0759494	0.101266	0.0886076	0.620253
N2	wt_D5_Lb.reuteri	0	0	0	0.04	0.02	0.04	0.06	0.84
N2	wt_D5_Lb.reuteri	0	0.0138889	0.0138889	0.0416667	0.0416667	0.0694444	0.319444	0.5
N2	wt_D5_Lb.reuteri	0	0	0	0.142857	0.0178571	0.0357143	0.25	0.553571
N2	wt_D5_Lb.reuteri	0	0	0	0.00847458	0.0169492	0.110169	0.313559	0.550847
N2	wt_D5_Lb.reuteri	0	0	0	0.0384615	0.0307692	0.0846154	0.330769	0.515385
N2	wt_D5_Lb.reuteri	0	0	0.005	0.02	0.045	0.125	0.535	0.27
N2	wt_D5_Lb.reuteri	0	0	0	0.0182927	0.0365854	0.0914634	0.384146	0.469512
N2	wt_D5_Lb.reuteri	0	0	0	0.0218341	0.0524017	0.117904	0.384279	0.423581
N2	wt_D5_Lb.reuteri	0.00444444	0.0133333	0.00888889	0.0577778	0.0711111	0.142222	0.275556	0.426667
N2	wt_D5_Lb.reuteri	0	0	0.00526316	0.0368421	0.0421053	0.0894737	0.321053	0.505263
N2	wt_D5_Lb.reuteri	0	0.00724638	0.00724638	0.0289855	0.0652174	0.130435	0.217391	0.543478
N2	wt_D5_Lb.reuteri	0	0	0.023622	0.0314961	0.0708661	0.0787402	0.283465	0.511811
N2	wt_D5_Lb.reuteri	0	0	0	0.034965	0.048951	0.0629371	0.265734	0.587413
CF1038	daf-16_D1	0	0.0215054	0.0215054	0.107527	0.11828	0.150538	0.236559	0.344086
CF1038	daf-16_D1	0	0.0176991	0.0176991	0.123894	0.115044	0.283186	0.292035	0.150442
CF1038	daf-16_D1	0	0.0422535	0.0422535	0.028169	0.084507	0.169014	0.366197	0.267606
CF1038	daf-16_D1	0.0163934	0.0163934	0.0163934	0.0163934	0.0327869	0.196721	0.377049	0.327869
CF1038	daf-16_D1	0.0133333	0.02	0.04	0.126667	0.18	0.206667	0.266667	0.146667
CF1038	daf-16_D1	0.0496454	0.035461	0.0780142	0.0780142	0.0780142	0.248227	0.234043	0.198582
CF1038	daf-16_D1	0.0132159	0.0220264	0.0264317	0.0264317	0.0837004	0.114537	0.246696	0.46696
CF1038	daf-16_D1	0.0769231	0.0448718	0.0448718	0.0448718	0.0512821	0.128205	0.275641	0.333333
CF1038	daf-16_D1	0.115942	0.0821256	0.057971	0.0483092	0.0821256	0.0772947	0.222222	0.31401
CF1038	daf-16_D1	0.0318182	0.0590909	0.0272727	0.0318182	0.0681818	0.159091	0.309091	0.313636
CF1038	daf-16_D1	0.027972	0.00699301	0.013986	0.0629371	0.0699301	0.153846	0.27972	0.384615
CF1038	daf-16_D1	0.00911854	0.0273556	0.0212766	0.0334347	0.0607903	0.121581	0.328267	0.398176
CF1038	daf-16_D1	0.026087	0.0173913	0.0376812	0.0434783	0.0782609	0.173913	0.249275	0.373913
CF1038	daf-16_D1	0.00743494	0.00743494	0.0446097	0.0520446	0.0817844	0.171004	0.29368	0.342007
CF1038	daf-16_D1	0.0136054	0.00680272	0.00340136	0.0544218	0.0680272	0.142857	0.336735	0.37415
CF1038	daf-16_D5_E.coli	0	0.015625	0.0078125	0.3125	0.398438	0.101562	0.109375	0.0546875
CF1038	daf-16_D5_E.coli	0.00840336	0.00840336	0.0168067	0.344538	0.302521	0.210084	0.0756303	0.0336134
CF1038	daf-16_D5_E.coli	0.0111111	0.0111111	0.0333333	0.255556	0.377778	0.0777778	0.111111	0.122222
CF1038	daf-16_D5_E.coli	0	0.0128205	0.025641	0.179487	0.307692	0.205128	0.102564	0.166667
CF1038	daf-16_D5_E.coli	0	0	0	0.416667	0.333333	0.0833333	0.0833333	0.0833333
CF1038	daf-16_D5_E.coli	0	0.00675676	0.00675676	0.337838	0.513514	0.0878378	0.0202703	0.027027
CF1038	daf-16_D5_E.coli	0	0	0	0.25	0.520833	0.09375	0.114583	0.0208333
CF1038	daf-16_D5_E.coli	0	0	0.0131579	0.184211	0.5	0.118421	0.0131579	0.171053
CF1038	daf-16_D5_E.coli	0	0.0131579	0.0131579	0.171053	0.315789	0.157895	0.105263	0.223684
CF1038	daf-16_D5_E.coli	0	0.00653595	0.00653595	0.366013	0.379085	0.117647	0.111111	0.0130719
CF1038	daf-16_D5_E.coli	0	0.00534759	0.00534759	0.42246	0.315508	0.165775	0.0588235	0.026738
CF1038	daf-16_D5_E.coli	0.00704225	0	0	0.330986	0.380282	0.112676	0.105634	0.0633803
CF1038	daf-16_D5_E.coli	0	0	0.00490196	0.0980392	0.578431	0.205882	0.0833333	0.0294118
CF1038	daf-16_D5_E.coli	0.00571429	0.00571429	0.0514286	0.131429	0.468571	0.217143	0.08	0.04
CF1038	daf-16_D5_E.coli	0	0	0.0282486	0.20339	0.276836	0.288136	0.158192	0.0451977
CF1038	daf-16_D5_E.coli	0.00403226	0.00403226	0.016129	0.258065	0.399194	0.169355	0.0766129	0.0725806
CF1038	daf-16_D5_E.coli	0	0	0.0495049	0.163366	0.50495	0.173267	0.0693069	0.039604
CF1038	daf-16_D5_Lb.reuteri	0	0	0	0.125	0.104167	0.3125	0.3125	0.145833
CF1038	daf-16_D5_Lb.reuteri	0	0.010989	0	0.0879121	0.0989011	0.285714	0.384615	0.131868
CF1038	daf-16_D5_Lb.reuteri	0	0.0117647	0	0.0117647	0.105882	0.117647	0.376471	0.376471
CF1038	daf-16_D5_Lb.reuteri	0	0	0	0.0508475	0.118644	0.152542	0.20339	0.474576
CF1038	daf-16_D5_Lb.reuteri	0	0	0	0.246377	0.637681	0.0869565	0	0.0289855
CF1038	daf-16_D5_Lb.reuteri	0	0	0	0.212121	0.515152	0.151515	0.0606061	0.0606061
CF1038	daf-16_D5_Lb.reuteri	0	0	0	0.0740741	0.759259	0.148148	0	0.0185185
CF1038	daf-16_D5_Lb.reuteri	0.0104167	0.0104167	0.03125	0.145833	0.229167	0.260417	0.114583	0.197917
CF1038	daf-16_D5_Lb.reuteri	0	0.0597015	0	0.0447761	0.164179	0.208955	0.164179	0.358209
CF1038	daf-16_D5_Lb.reuteri	0	0	0	0.0243902	0.158537	0.378049	0.390244	0.0487805
CF1038	daf-16_D5_Lb.reuteri	0	0	0	0	0.0941176	0.235294	0.6	0.0705882
CF1038	daf-16_D5_Lb.reuteri	0	0.0070922	0	0.035461	0.12766	0.397163	0.340426	0.0921986
CF1038	daf-16_D5_Lb.reuteri	0	0	0.00729927	0.0218978	0.321168	0.29927	0.328467	0.0218978
CF1038	daf-16_D5_Lb.reuteri	0	0	0.0031348	0.0438871	0.257053	0.492163	0.203762	0
CF1038	daf-16_D5_Lb.reuteri	0	0	0.00896861	0.0269058	0.170404	0.358744	0.412556	0.0224215
CF1038	daf-16_D5_Lb.reuteri	0	0	0	0.0220588	0.132353	0.367647	0.397059	0.0808824
CF1038	daf-16_D5_Lb.reuteri	0	0	0.00769231	0.0307692	0.123077	0.338462	0.292308	0.207692
CF1038	daf-16_D5_Lb.reuteri	0	0	0.00483092	0.0338164	0.217391	0.495169	0.224638	0.0241546
CF1038	daf-16_D5_Lb.reuteri	0.00302115	0	0.0181269	0.135952	0.386707	0.299094	0.135952	0.021148
CF1038	daf-16_D5_Lb.reuteri	0	0	0.0046729	0.102804	0.168224	0.383178	0.242991	0.0981308
CF1038	daf-16_D5_Lb.reuteri	0	0	0	0.0820896	0.179104	0.373134	0.298507	0.0671642
CF1038	daf-16_D5_Lb.reuteri	0	0.00333333	0.00333333	0.0466667	0.133333	0.406667	0.38	0.0266667
