# Supplementary material for: Bacterial diet affects the age-dependent decline of associative learning in Caenorhabditis elegans
Source: eLife. 2023 May 30;12:e81418. doi: 10.7554/eLife.81418 (PMC10229132; doi:10.7554/eLife.81418)
Supplement: Figure 7—source data 3. [file elife-81418-fig7-data3.xlsx]

## Sheet: Fig7C
Source data for Figure 7C
1=Dead, 0=Censored
Days of adulthood	wt, E. coli	wt, Lb. reuteri	daf-16, E. coli	daf-16, Lb. reuteri
3	1
3	1
10	1
10	1
10	1
10	1
10	1
11	1
11	1
12	1
12	1
12	1
13	1
13	1
14	1
14	1
14	1			2
14	1
15	1
15	1
16	1
16	1
17	1
17	1
18	1
2		0
2		0
2		0
2		0
2		0
2		0
2		0
3		0
3		1
3		0
4		1
7		1
8		0
8		0
10		1
11		1
12		1
13		1
13		1
13		1
15		1
15		1
16		1
17		1
18		1
2			0
3			1
4			1
6			1
7			1
7			1
8			1
9			1
9			1
10			1
10			1
10			1
10			1
11			1
11			1
11			1
12			1
12			1
12			1
12			1
13			1
13			1
13			1
13			1
14			1
2				0
2				0
2				0
4				1
4				0
5				1
6				1
10				1
10				1
11				1
12				1
12				1
12				1
12				1
13				1
13				1
13				1
13				1
14				1
14				1
14				1
15				1
16				1
16				1
17				1
3	0
4	0
6	1
8	1
10	1
10	1
14	1
16	1
16	1
16	1
16	1
17	1
17	1
17	1
17	1
17	1
18	1
18	1
18	1
18	1
19	1
20	1
21	1
21	1
22	1
2		0
2		0
2		0
4		1
4		0
4		0
6		1
8		0
10		1
11		0
12		1
12		0
14		1
14		1
14		1
15		1
15		1
15		1
16		1
16		1
16		1
17		1
18		1
18		1
21		1
2			0
4			1
4			1
4			1
4			1
4			0
8			1
8			1
8			1
9			1
10			1
10			1
10			1
10			1
11			1
11			1
12			1
12			1
13			1
13			1
13			1
14			1
14			1
14			1
15			1
2				0
2				0
2				0
3				0
3				0
9				1
9				1
10				1
11				1
12				1
13				1
13				1
14				1
14				1
14				1
14				1
14				1
15				1
15				1
16				1
16				1
17				1
17				1
17				1
18				1
5	1
6	1
7	1
7	1
8	1
8	1
9	1
9	1
10	1
10	1
10	1
11	1
11	1
11	1
11	1
11	1
12	1
12	1
13	1
13	1
14	1
15	1
15	1
16	1
16	1
3		0
3		0
4		0
4		0
6		0
8		1
8		1
8		1
10		1
10		1
10		1
10		1
11		0
12		1
13		1
13		1
14		1
15		1
16		1
16		1
16		1
17		1
18		1
19		1
20		1
2			1
4			1
4			1
4			1
4			1
4			0
5			1
6			1
7			1
7			1
8			1
8			1
8			1
9			1
9			1
10			1
10			1
10			1
11			1
12			1
12			1
13			1
13			1
13			1
15			1
2				0
2				0
2				1
3				1
3				1
4				0
5				1
6				0
6				0
6				0
8				1
10				1
12				1
13				1
14				1
14				1
15				1
15				1
16				1
16				1
16				1
16				1
17				1
17				1
17				1
4	1
4	1
6	1
7	1
7	0
8	1
9	1
9	1
10	1
10	1
11	1
11	1
11	1
11	1
11	1
12	1
12	1
12	1
12	1
12	1
12	1
13	1
13	1
13	1
15	1
2		1
2		0
2		0
2		0
3		0
3		0
9		1
10		1
10		1
11		1
12		1
13		1
13		1
14		1
14		1
14		1
14		1
15		1
15		1
15		1
15		1
16		1
17		1
17		1
20		1
2			0
3			1
3			1
3			1
5			1
5			1
6			1
7			1
7			1
7			1
8			1
8			1
8			1
9			1
9			1
10			1
10			1
10			1
11			1
11			1
12			1
12			1
12			1
13			1
15			1
2				0
2				0
3				0
3				0
8				1
9				1
10				1
11				1
11				1
12				1
12				1
12				1
13				1
13				1
13				1
13				1
13				1
14				1
14				1
14				1
15				1
15				1
16				1
16				1
16				1
4	0
7	1
9	1
10	1
10	1
10	1
10	1
11	1
11	1
11	1
11	1
12	1
12	1
12	1
13	1
13	1
13	1
13	1
13	1
14	1
14	1
14	1
15	1
15	1
19	1
2		0
2		0
2		0
2		1
3		0
3		0
8		1
8		1
9		1
9		1
10		1
11		1
11		1
12		1
12		1
12		1
13		1
14		1
14		1
14		1
15		1
16		1
17		1
19		1
21		1
3			0
3			0
4			1
4			0
6			1
6			1
7			1
8			1
8			1
8			1
8			1
9			1
9			1
9			1
9			1
10			1
11			1
11			1
12			1
12			1
12			1
14			1
14			1
14			1
16			1
2				0
2				0
2				0
3				0
5				0
6				1
6				1
7				1
7				1
9				1
9				0
13				1
13				1
13				1
13				1
14				1
14				1
14				1
14				1
14				1
14				1
15				1
16				1
16				1
16				1
7	0
8	1
9	1
9	1
10	1
11	1
11	1
11	1
11	1
11	1
12	1
12	1
12	1
12	1
12	1
12	1
12	1
13	1
13	1
13	1
13	1
13	1
13	1
14	1
17	1
2		0
2		0
2		0
3		0
5		0
8		0
8		1
9		1
9		0
10		1
11		1
11		1
11		1
12		1
12		1
12		1
12		1
14		1
16		1
16		1
17		1
17		1
18		1
18		1
18		1
2			0
3			1
3			0
4			0
5			1
6			1
6			1
7			1
7			1
8			1
8			1
9			1
9			1
10			1
10			1
10			1
10			0
10			0
11			1
11			1
12			1
13			1
13			1
14			1
15			1
2				1
2				0
4				1
7				1
9				1
10				1
11				1
11				1
12				1
12				1
12				1
12				1
12				1
13				1
13				1
13				1
13				1
13				1
14				1
14				1
15				1
16				1
17				1
17				1
18				1
