# Supplementary material for: Bacterial diet affects the age-dependent decline of associative learning in Caenorhabditis elegans
Source: eLife. 2023 May 30;12:e81418. doi: 10.7554/eLife.81418 (PMC10229132; doi:10.7554/eLife.81418)
Supplement: Figure 7—source data 4. [file elife-81418-fig7-data4.xlsx]

## Sheet: Fig7D
Source data for Figure 7D
Condition	Performance_index
wt_D1	0.192982
wt_D1	0.355191
wt_D1	0.078341
wt_D1	0.320755
wt_D1	0.430769
wt_D1	0.27
wt_D1	0.834951
wt_D1	0.642857
wt_D1	0.621622
wt_D1	0.53125
wt_D1	0.495238
wt_D1	0.344
wt_D1	0.591304
wt_D1	0.282353
wt_D1	0.53271
wt_D1	0.733333
wt_D1	0.359649
wt_D1	0.355556
wt_D1	0.402985
wt_D1	0.270073
wt_D1	0.75
wt_D1	0.744526
wt_D1	0.852761
wt_D1	0.366667
wt_D5_E.coli	0.396825
wt_D5_E.coli	0.145161
wt_D5_E.coli	0.173469
wt_D5_E.coli	0.0390625
wt_D5_E.coli	0.104712
wt_D5_E.coli	0.0555556
wt_D5_E.coli	0.0734463
wt_D5_E.coli	0.0418605
wt_D5_E.coli	0.174603
wt_D5_E.coli	0.223958
wt_D5_E.coli	0.151079
wt_D5_E.coli	0.182432
wt_D5_E.coli	0.0666667
wt_D5_E.coli	0.311927
wt_D5_E.coli	0.285714
wt_D5_E.coli	0.356164
wt_D5_Lb.reuteri	0.626866
wt_D5_Lb.reuteri	0.533333
wt_D5_Lb.reuteri	0.482759
wt_D5_Lb.reuteri	0.494118
wt_D5_Lb.reuteri	0.552083
wt_D5_Lb.reuteri	0.482993
wt_D5_Lb.reuteri	0.183168
wt_D5_Lb.reuteri	0.105263
wt_D5_Lb.reuteri	0.103659
wt_D5_Lb.reuteri	0.366071
wt_D5_Lb.reuteri	0.287879
wt_D5_Lb.reuteri	0.4
wt_D5_Lb.reuteri	0.0178571
wt_D5_Lb.reuteri	0
wt_D5_Lb.reuteri	0.00892857
wt_D5_Lb.reuteri	0.804124
wt_D5_Lb.reuteri	0.829545
wt_D5_Lb.reuteri	0.846154
daf-2_D1	0.0792683
daf-2_D1	0.0140187
daf-2_D1	0.00546448
daf-2_D1	0.162304
daf-2_D1	0.111111
daf-2_D1	0.0564103
daf-2_D1	0.0641711
daf-2_D1	0.0153846
daf-2_D1	0.010101
daf-2_D1	0.015748
daf-2_D1	0.124088
daf-2_D1	0.0294118
daf-2_D1	0.00740741
daf-2_D1	0.075188
daf-2_D1	0.078534
daf-2_D1	0.0106952
daf-2_D1	0.151685
daf-2_D1	0.0125786
daf-2_D1	0.0410959
daf-2_D1	0.04375
daf-2_D1	0.183099
daf-2_D1	0.184971
daf-2_D1	0.303448
daf-2_D5_E.coli	0.37931
daf-2_D5_E.coli	0.21875
daf-2_D5_E.coli	0.0421053
daf-2_D5_E.coli	0.114094
daf-2_D5_E.coli	0.141304
daf-2_D5_E.coli	0
daf-2_D5_E.coli	0.00900901
daf-2_D5_E.coli	0.00714286
daf-2_D5_E.coli	0.611374
daf-2_D5_E.coli	0.4
daf-2_D5_E.coli	0.392
daf-2_D5_E.coli	0.194245
daf-2_D5_E.coli	0.178571
daf-2_D5_E.coli	0.169355
daf-2_D5_E.coli	0.182692
daf-2_D5_E.coli	0.0240964
daf-2_D5_E.coli	0.0873786
daf-2_D5_Lb.reuteri	0.027027
daf-2_D5_Lb.reuteri	0.0208333
daf-2_D5_Lb.reuteri	0.0675676
daf-2_D5_Lb.reuteri	0.255319
daf-2_D5_Lb.reuteri	0.502262
daf-2_D5_Lb.reuteri	0.475113
daf-2_D5_Lb.reuteri	0.0463576
daf-2_D5_Lb.reuteri	0.00546448
daf-2_D5_Lb.reuteri	0
daf-2_D5_Lb.reuteri	0.797386
daf-2_D5_Lb.reuteri	0.70073
daf-2_D5_Lb.reuteri	0.603896
daf-2_D5_Lb.reuteri	0.023622
daf-2_D5_Lb.reuteri	0.05
daf-2_D5_Lb.reuteri	0.0350877
daf-2_D5_Lb.reuteri	0.113924
daf-2_D5_Lb.reuteri	0.0988372
daf-2_D5_Lb.reuteri	0.185629
