# Supplementary material for: Bacterial diet affects the age-dependent decline of associative learning in Caenorhabditis elegans
Source: eLife. 2023 May 30;12:e81418. doi: 10.7554/eLife.81418 (PMC10229132; doi:10.7554/eLife.81418)
Supplement: Figure 8—figure supplement 1—source data 1. [file elife-81418-fig8-figsupp1-data1.xlsx]

## Sheet: Fig8-S1
Source data for Figure 8-Figure supplement 1
Strain	Condition	Performance index
N2	wt_D1_IAA(-)	0.32567
N2	wt_D1_IAA(-)	0.693617
N2	wt_D1_IAA(-)	0.688889
N2	wt_D1_IAA(-)	0.590038
N2	wt_D1_IAA(-)	0.313901
N2	wt_D1_IAA(-)	0.632911
N2	wt_D1_IAA(-)	0.565891
N2	wt_D1_IAA(-)	0.635802
N2	wt_D1_IAA(-)	0.748503
N2	wt_D1_IAA(-)	0.682927
N2	wt_D1_IAA(-)	0.520408
N2	wt_D1_IAA(-)	0.533088
N2	wt_D1_IAA(-)	0.431655
N2	wt_D5_E.coli_IAA(-)	0.306452
N2	wt_D5_E.coli_IAA(-)	0.516393
N2	wt_D5_E.coli_IAA(-)	0.208696
N2	wt_D5_E.coli_IAA(-)	0.466667
N2	wt_D5_E.coli_IAA(-)	0.344828
N2	wt_D5_E.coli_IAA(-)	0.217391
N2	wt_D5_E.coli_IAA(-)	0.159091
N2	wt_D5_E.coli_IAA(-)	0.0846154
N2	wt_D5_E.coli_IAA(-)	0.148649
N2	wt_D5_E.coli_IAA(-)	0.122951
N2	wt_D5_E.coli_IAA(-)	0.285714
N2	wt_D5_E.coli_IAA(-)	0.0925926
N2	wt_D5_E.coli_IAA(-)	0.12844
N2	wt_D5_Lb.reuteri_IAA(-)	0.857143
N2	wt_D5_Lb.reuteri_IAA(-)	0.84252
N2	wt_D5_Lb.reuteri_IAA(-)	0.72043
N2	wt_D5_Lb.reuteri_IAA(-)	0.901639
N2	wt_D5_Lb.reuteri_IAA(-)	0.873016
N2	wt_D5_Lb.reuteri_IAA(-)	0.666667
N2	wt_D5_Lb.reuteri_IAA(-)	0.645833
N2	wt_D5_Lb.reuteri_IAA(-)	0.701493
N2	wt_D5_Lb.reuteri_IAA(-)	0.831461
N2	wt_D5_Lb.reuteri_IAA(-)	0.521505
N2	wt_D5_Lb.reuteri_IAA(-)	0.625698
N2	wt_D5_Lb.reuteri_IAA(-)	0.5
N2	wt_D1_IAA(+)	0.728916
N2	wt_D1_IAA(+)	0.720379
N2	wt_D1_IAA(+)	0.118081
N2	wt_D1_IAA(+)	0.679715
N2	wt_D1_IAA(+)	0.455939
N2	wt_D1_IAA(+)	0.743243
N2	wt_D1_IAA(+)	0.666667
N2	wt_D1_IAA(+)	0.822857
N2	wt_D1_IAA(+)	0.756219
N2	wt_D1_IAA(+)	0.862275
N2	wt_D1_IAA(+)	0.659292
N2	wt_D5_E.coli_IAA(+)	0.54386
N2	wt_D5_E.coli_IAA(+)	0.40625
N2	wt_D5_E.coli_IAA(+)	0.457627
N2	wt_D5_E.coli_IAA(+)	0.285714
N2	wt_D5_E.coli_IAA(+)	0.515152
N2	wt_D5_E.coli_IAA(+)	0.459677
N2	wt_D5_E.coli_IAA(+)	0.325397
N2	wt_D5_E.coli_IAA(+)	0.466165
N2	wt_D5_E.coli_IAA(+)	0.245283
N2	wt_D5_E.coli_IAA(+)	0.27451
N2	wt_D5_E.coli_IAA(+)	0.410072
N2	wt_D5_Lb.reuteri_IAA(+)	0.766129
N2	wt_D5_Lb.reuteri_IAA(+)	0.744828
N2	wt_D5_Lb.reuteri_IAA(+)	0.518072
N2	wt_D5_Lb.reuteri_IAA(+)	0.518182
N2	wt_D5_Lb.reuteri_IAA(+)	0.553846
N2	wt_D5_Lb.reuteri_IAA(+)	0.434426
N2	wt_D5_Lb.reuteri_IAA(+)	0.53125
N2	wt_D5_Lb.reuteri_IAA(+)	0.569343
N2	wt_D5_Lb.reuteri_IAA(+)	0.556962
N2	wt_D5_Lb.reuteri_IAA(+)	0.632353
N2	wt_D5_Lb.reuteri_IAA(+)	0.54955
N2	wt_D5_Lb.reuteri_IAA(+)	0.566038
N2	wt_D5_Lb.reuteri_IAA(+)	0.647059
NUJ559	daf-16degron_D1_IAA(-)	0.804233
NUJ559	daf-16degron_D1_IAA(-)	0.850242
NUJ559	daf-16degron_D1_IAA(-)	0.804598
NUJ559	daf-16degron_D1_IAA(-)	0.448413
NUJ559	daf-16degron_D1_IAA(-)	0.703081
NUJ559	daf-16degron_D1_IAA(-)	0.639485
NUJ559	daf-16degron_D1_IAA(-)	0.698276
NUJ559	daf-16degron_D1_IAA(-)	0.643678
NUJ559	daf-16degron_D1_IAA(-)	0.712121
NUJ559	daf-16degron_D1_IAA(-)	0.674157
NUJ559	daf-16degron_D1_IAA(-)	0.714286
NUJ559	daf-16degron_D1_IAA(-)	0.760976
NUJ559	daf-16degron_D1_IAA(-)	0.669725
NUJ559	daf-16degron_D5_E.coli_IAA(-)	0.655914
NUJ559	daf-16degron_D5_E.coli_IAA(-)	0.488889
NUJ559	daf-16degron_D5_E.coli_IAA(-)	0.413043
NUJ559	daf-16degron_D5_E.coli_IAA(-)	0.324561
NUJ559	daf-16degron_D5_E.coli_IAA(-)	0.459016
NUJ559	daf-16degron_D5_E.coli_IAA(-)	0.271845
NUJ559	daf-16degron_D5_E.coli_IAA(-)	0.191176
NUJ559	daf-16degron_D5_E.coli_IAA(-)	0.0958904
NUJ559	daf-16degron_D5_E.coli_IAA(-)	0.141732
NUJ559	daf-16degron_D5_E.coli_IAA(-)	0.103896
NUJ559	daf-16degron_D5_E.coli_IAA(-)	0.0691824
NUJ559	daf-16degron_D5_E.coli_IAA(-)	0.0961538
NUJ559	daf-16degron_D5_E.coli_IAA(-)	0.112426
NUJ559	daf-16degron_D5_Lb.reuteri_IAA(-)	0.901961
NUJ559	daf-16degron_D5_Lb.reuteri_IAA(-)	0.804878
NUJ559	daf-16degron_D5_Lb.reuteri_IAA(-)	0.776471
NUJ559	daf-16degron_D5_Lb.reuteri_IAA(-)	0.765625
NUJ559	daf-16degron_D5_Lb.reuteri_IAA(-)	0.525641
NUJ559	daf-16degron_D5_Lb.reuteri_IAA(-)	0.627119
NUJ559	daf-16degron_D5_Lb.reuteri_IAA(-)	0.426471
NUJ559	daf-16degron_D5_Lb.reuteri_IAA(-)	0.691892
NUJ559	daf-16degron_D5_Lb.reuteri_IAA(-)	0.685535
NUJ559	daf-16degron_D5_Lb.reuteri_IAA(-)	0.653846
NUJ559	daf-16degron_D5_Lb.reuteri_IAA(-)	0.657025
NUJ559	daf-16degron_D1_IAA(+)	0.610619
NUJ559	daf-16degron_D1_IAA(+)	0.663212
NUJ559	daf-16degron_D1_IAA(+)	0.814815
NUJ559	daf-16degron_D1_IAA(+)	0.753247
NUJ559	daf-16degron_D1_IAA(+)	0.666667
NUJ559	daf-16degron_D1_IAA(+)	0.709677
NUJ559	daf-16degron_D1_IAA(+)	0.814607
NUJ559	daf-16degron_D1_IAA(+)	0.861244
NUJ559	daf-16degron_D1_IAA(+)	0.863636
NUJ559	daf-16degron_D1_IAA(+)	0.774648
NUJ559	daf-16degron_D5_E.coli_IAA(+)	0.580645
NUJ559	daf-16degron_D5_E.coli_IAA(+)	0.377246
NUJ559	daf-16degron_D5_E.coli_IAA(+)	0.496644
NUJ559	daf-16degron_D5_E.coli_IAA(+)	0.316239
NUJ559	daf-16degron_D5_E.coli_IAA(+)	0.275
NUJ559	daf-16degron_D5_E.coli_IAA(+)	0.186207
NUJ559	daf-16degron_D5_E.coli_IAA(+)	0.495327
NUJ559	daf-16degron_D5_E.coli_IAA(+)	0.358621
NUJ559	daf-16degron_D5_E.coli_IAA(+)	0.45283
NUJ559	daf-16degron_D5_E.coli_IAA(+)	0.415663
NUJ559	daf-16degron_D5_E.coli_IAA(+)	0.555556
NUJ559	daf-16degron_D5_Lb.reuteri_IAA(+)	0.373832
NUJ559	daf-16degron_D5_Lb.reuteri_IAA(+)	0.289655
NUJ559	daf-16degron_D5_Lb.reuteri_IAA(+)	0.208333
NUJ559	daf-16degron_D5_Lb.reuteri_IAA(+)	0.691589
NUJ559	daf-16degron_D5_Lb.reuteri_IAA(+)	0.450549
NUJ559	daf-16degron_D5_Lb.reuteri_IAA(+)	0.331081
NUJ559	daf-16degron_D5_Lb.reuteri_IAA(+)	0.37931
NUJ559	daf-16degron_D5_Lb.reuteri_IAA(+)	0.431579
NUJ559	daf-16degron_D5_Lb.reuteri_IAA(+)	0.373913
NUJ559	daf-16degron_D5_Lb.reuteri_IAA(+)	0.344538
NUJ559	daf-16degron_D5_Lb.reuteri_IAA(+)	0.290323
