# Supplementary material for: Bacterial diet affects the age-dependent decline of associative learning in Caenorhabditis elegans
Source: eLife. 2023 May 30;12:e81418. doi: 10.7554/eLife.81418 (PMC10229132; doi:10.7554/eLife.81418)
Supplement: Figure 8—source data 1. [file elife-81418-fig8-data1.xlsx]

## Sheet: Fig8B
Source data for Figure 8D
Strain	Condition	Memory_index
N2	wt_D1	0.578125
N2	wt_D1	0.662651
N2	wt_D1	0.640449
N2	wt_D1	0.688889
N2	wt_D1	0.72
N2	wt_D1	0.793651
N2	wt_D1	0.594937
N2	wt_D1	0.850467
N2	wt_D1	0.62069
N2	wt_D1	0.827068
N2	wt_D1	0.627273
N2	wt_D1	0.789116
N2	wt_D1	0.785047
N2	wt_D1	0.683544
N2	wt_D1	0.707547
N2	wt_D1	0.714286
N2	wt_D1	0.77193
N2	wt_D1	0.661972
N2	wt_D1	0.80597
N2	wt_D1	0.589744
N2	wt_D1	0.75
N2	wt_D1	0.767123
N2	wt_D1	0.694215
N2	wt_D1	0.847826
N2	wt_D1	0.73913
N2	wt_D1	0.878788
N2	wt_D1	0.901961
N2	wt_D1	0.758621
N2	wt_D1	0.697674
N2	wt_D1	0.71831
N2	wt_D1	0.519685
N2	wt_D1	0.706806
N2	wt_D1	0.559006
N2	wt_D1	0.767241
N2	wt_D1	0.84058
N2	wt_D1	0.718447
N2	wt_D1	0.64486
N2	wt_D1	0.735683
N2	wt_D5_E.coli	0.253968
N2	wt_D5_E.coli	0.342593
N2	wt_D5_E.coli	0.393617
N2	wt_D5_E.coli	0.402299
N2	wt_D5_E.coli	0.275362
N2	wt_D5_E.coli	0.246753
N2	wt_D5_E.coli	0.217391
N2	wt_D5_E.coli	0.1875
N2	wt_D5_E.coli	0.586207
N2	wt_D5_E.coli	0.362637
N2	wt_D5_E.coli	0.304348
N2	wt_D5_E.coli	0.0333333
N2	wt_D5_E.coli	0.028169
N2	wt_D5_E.coli	0.620253
N2	wt_D5_E.coli	0.493827
N2	wt_D5_E.coli	0.405405
N2	wt_D5_E.coli	0.369863
N2	wt_D5_E.coli	0.264
N2	wt_D5_E.coli	0.309353
N2	wt_D5_E.coli	0.561905
N2	wt_D5_E.coli	0.201835
N2	wt_D5_E.coli	0.263158
N2	wt_D5_E.coli	0.231579
N2	wt_D5_E.coli	0.280702
N2	wt_D5_E.coli	0.238095
N2	wt_D5_E.coli	0.254386
N2	wt_D5_E.coli	0.368421
N2	wt_D5_E.coli	0.326923
N2	wt_D5_Lb.reuteri	0.730769
N2	wt_D5_Lb.reuteri	0.777778
N2	wt_D5_Lb.reuteri	0.885714
N2	wt_D5_Lb.reuteri	0.708861
N2	wt_D5_Lb.reuteri	0.9
N2	wt_D5_Lb.reuteri	0.75
N2	wt_D5_Lb.reuteri	0.693069
N2	wt_D5_Lb.reuteri	0.810127
N2	wt_D5_Lb.reuteri	0.887324
N2	wt_D5_Lb.reuteri	0.876404
N2	wt_D5_Lb.reuteri	0.740741
N2	wt_D5_Lb.reuteri	0.591837
N2	wt_D5_Lb.reuteri	0.494737
N2	wt_D5_Lb.reuteri	0.333333
N2	wt_D5_Lb.reuteri	0.763636
N2	wt_D5_Lb.reuteri	0.917874
N2	wt_D5_Lb.reuteri	0.834437
N2	wt_D5_Lb.reuteri	0.98
N2	wt_D5_Lb.reuteri	0.880435
N2	wt_D5_Lb.reuteri	0.82069
N2	wt_D5_Lb.reuteri	0.904255
N2	wt_D5_Lb.reuteri	0.666667
N2	wt_D5_Lb.reuteri	0.69863
N2	wt_D5_Lb.reuteri	0.821053
N2	wt_D5_Lb.reuteri	0.871622
N2	wt_D5_Lb.reuteri	0.898089
N2	wt_D5_Lb.reuteri	0.958621
N2	wt_D5_Lb.reuteri	0.978723
N2	wt_D5_Lb.reuteri	0.819444
N2	wt_D5_Lb.reuteri	0.803571
N2	wt_D5_Lb.reuteri	0.864407
N2	wt_D5_Lb.reuteri	0.846154
N2	wt_D5_Lb.reuteri	0.8125
N2	wt_D5_Lb.reuteri	0.9
N2	wt_D5_Lb.reuteri	0.907285
N2	wt_D5_Lb.reuteri	0.819444
CF1038	daf-16(mu86)_D1	0.958084
CF1038	daf-16(mu86)_D1	0.471698
CF1038	daf-16(mu86)_D1	0.975
CF1038	daf-16(mu86)_D1	0.413333
CF1038	daf-16(mu86)_D1	0.432624
CF1038	daf-16(mu86)_D1	0.580645
CF1038	daf-16(mu86)_D1	0.442478
CF1038	daf-16(mu86)_D1	0.633803
CF1038	daf-16(mu86)_D1	0.704918
CF1038	daf-16(mu86)_D1	0.726444
CF1038	daf-16(mu86)_D1	0.623188
CF1038	daf-16(mu86)_D1	0.635688
CF1038	daf-16(mu86)_D1	0.710884
CF1038	daf-16(mu86)_D1	0.726444
CF1038	daf-16(mu86)_D1	0.623188
CF1038	daf-16(mu86)_D1	0.635688
CF1038	daf-16(mu86)_D1	0.710884
CF1038	daf-16(mu86)_D1	0.733333
CF1038	daf-16(mu86)_D1	0.85119
CF1038	daf-16(mu86)_D1	0.529412
CF1038	daf-16(mu86)_D1	0.45977
CF1038	daf-16(mu86)_D1	0.758333
CF1038	daf-16(mu86)_D1	0.72
CF1038	daf-16(mu86)_D1	0.575472
CF1038	daf-16(mu86)_D1	0.732759
CF1038	daf-16(mu86)_D1	0.647059
CF1038	daf-16(mu86)_D1	0.236842
CF1038	daf-16(mu86)_D1	0.368421
CF1038	daf-16(mu86)_D1	0.392857
CF1038	daf-16(mu86)_D1	0.697674
CF1038	daf-16(mu86)_D1	0.225806
CF1038	daf-16(mu86)_D1	0.520408
CF1038	daf-16(mu86)_D1	0.609524
CF1038	daf-16(mu86)_D1	0.713656
CF1038	daf-16(mu86)_D1	0.608974
CF1038	daf-16(mu86)_D1	0.536232
CF1038	daf-16(mu86)_D1	0.622727
CF1038	daf-16(mu86)_D1	0.664336
CF1038	daf-16(mu86)_D1	0.612245
CF1038	daf-16(mu86)_D1	0.451327
CF1038	daf-16(mu86)_D1	0.430556
CF1038	daf-16(mu86)_D1	0.594406
CF1038	daf-16(mu86)_D5_E.coli	0.166667
CF1038	daf-16(mu86)_D5_E.coli	0.0472973
CF1038	daf-16(mu86)_D5_E.coli	0.135417
CF1038	daf-16(mu86)_D5_E.coli	0.184211
CF1038	daf-16(mu86)_D5_E.coli	0.328947
CF1038	daf-16(mu86)_D5_E.coli	0.164062
CF1038	daf-16(mu86)_D5_E.coli	0.109244
CF1038	daf-16(mu86)_D5_E.coli	0.233333
CF1038	daf-16(mu86)_D5_E.coli	0.269231
CF1038	daf-16(mu86)_D5_E.coli	0.12
CF1038	daf-16(mu86)_D5_E.coli	0.20339
CF1038	daf-16(mu86)_D5_E.coli	0.149194
CF1038	daf-16(mu86)_D5_E.coli	0.108911
CF1038	daf-16(mu86)_D5_E.coli	0.12
CF1038	daf-16(mu86)_D5_E.coli	0.20339
CF1038	daf-16(mu86)_D5_E.coli	0.149194
CF1038	daf-16(mu86)_D5_E.coli	0.108911
CF1038	daf-16(mu86)_D5_E.coli	0.290698
CF1038	daf-16(mu86)_D5_E.coli	0.159091
CF1038	daf-16(mu86)_D5_E.coli	0.0957447
CF1038	daf-16(mu86)_D5_E.coli	0.0956522
CF1038	daf-16(mu86)_D5_E.coli	0.16
CF1038	daf-16(mu86)_D5_E.coli	0.0897436
CF1038	daf-16(mu86)_D5_E.coli	0.2
CF1038	daf-16(mu86)_D5_E.coli	0.2
CF1038	daf-16(mu86)_D5_E.coli	0.333333
CF1038	daf-16(mu86)_D5_E.coli	0.0930233
CF1038	daf-16(mu86)_D5_E.coli	0.453271
CF1038	daf-16(mu86)_D5_E.coli	0.124183
CF1038	daf-16(mu86)_D5_E.coli	0.0855615
CF1038	daf-16(mu86)_D5_E.coli	0.169014
CF1038	daf-16(mu86)_D5_E.coli	0.112745
CF1038	daf-16(mu86)_D5_E.coli	0.242424
CF1038	daf-16(mu86)_D5_E.coli	0.325581
CF1038	daf-16(mu86)_D5_E.coli	0.310526
CF1038	daf-16(mu86)_D5_E.coli	0.244444
CF1038	daf-16(mu86)_D5_Lb.reuteri	0.0289855
CF1038	daf-16(mu86)_D5_Lb.reuteri	0.121212
CF1038	daf-16(mu86)_D5_Lb.reuteri	0.0185185
CF1038	daf-16(mu86)_D5_Lb.reuteri	0.3125
CF1038	daf-16(mu86)_D5_Lb.reuteri	0.522388
CF1038	daf-16(mu86)_D5_Lb.reuteri	0.458333
CF1038	daf-16(mu86)_D5_Lb.reuteri	0.516484
CF1038	daf-16(mu86)_D5_Lb.reuteri	0.752941
CF1038	daf-16(mu86)_D5_Lb.reuteri	0.677966
CF1038	daf-16(mu86)_D5_Lb.reuteri	0.203762
CF1038	daf-16(mu86)_D5_Lb.reuteri	0.434978
CF1038	daf-16(mu86)_D5_Lb.reuteri	0.477941
CF1038	daf-16(mu86)_D5_Lb.reuteri	0.5
CF1038	daf-16(mu86)_D5_Lb.reuteri	0.248792
CF1038	daf-16(mu86)_D5_Lb.reuteri	0.1571
CF1038	daf-16(mu86)_D5_Lb.reuteri	0.341121
CF1038	daf-16(mu86)_D5_Lb.reuteri	0.365672
CF1038	daf-16(mu86)_D5_Lb.reuteri	0.406667
CF1038	daf-16(mu86)_D5_Lb.reuteri	0.203762
CF1038	daf-16(mu86)_D5_Lb.reuteri	0.434978
CF1038	daf-16(mu86)_D5_Lb.reuteri	0.477941
CF1038	daf-16(mu86)_D5_Lb.reuteri	0.5
CF1038	daf-16(mu86)_D5_Lb.reuteri	0.248792
CF1038	daf-16(mu86)_D5_Lb.reuteri	0.1571
CF1038	daf-16(mu86)_D5_Lb.reuteri	0.341121
CF1038	daf-16(mu86)_D5_Lb.reuteri	0.365672
CF1038	daf-16(mu86)_D5_Lb.reuteri	0.406667
CF1038	daf-16(mu86)_D5_Lb.reuteri	0.396694
CF1038	daf-16(mu86)_D5_Lb.reuteri	0.532847
CF1038	daf-16(mu86)_D5_Lb.reuteri	0.142857
CF1038	daf-16(mu86)_D5_Lb.reuteri	0.183099
CF1038	daf-16(mu86)_D5_Lb.reuteri	0.382353
CF1038	daf-16(mu86)_D5_Lb.reuteri	0.298507
CF1038	daf-16(mu86)_D5_Lb.reuteri	0.55102
CF1038	daf-16(mu86)_D5_Lb.reuteri	0.542857
CF1038	daf-16(mu86)_D5_Lb.reuteri	0.623529
CF1038	daf-16(mu86)_D5_Lb.reuteri	0.65625
CF1038	daf-16(mu86)_D5_Lb.reuteri	0.401099
CF1038	daf-16(mu86)_D5_Lb.reuteri	0.536232
CF1038	daf-16(mu86)_D5_Lb.reuteri	0.26087
CF1038	daf-16(mu86)_D5_Lb.reuteri	0.285714
CF1038	daf-16(mu86)_D5_Lb.reuteri	0.396226
CF1038	daf-16(mu86)_D5_Lb.reuteri	0.54065
CF1038	daf-16(mu86)_D5_Lb.reuteri	0.352174
CF1038	daf-16(mu86)_D5_Lb.reuteri	0.61326
CF1038	daf-16(mu86)_D5_Lb.reuteri	0.8125
CF1038	daf-16(mu86)_D5_Lb.reuteri	0.439024
CF1038	daf-16(mu86)_D5_Lb.reuteri	0.670588
CF1038	daf-16(mu86)_D5_Lb.reuteri	0.432624
CF1038	daf-16(mu86)_D5_Lb.reuteri	0.350365
CF1038	daf-16(mu86)_D5_Lb.reuteri	0.480769
CF1038	daf-16(mu86)_D5_Lb.reuteri	0.360825
CF1038	daf-16(mu86)_D5_Lb.reuteri	0.306011
CF1038	daf-16(mu86)_D5_Lb.reuteri	0.389381
NUJ176	daf-16(mg54)_D1	0.619718
NUJ176	daf-16(mg54)_D1	0.651007
NUJ176	daf-16(mg54)_D1	0.712766
NUJ176	daf-16(mg54)_D1	0.755556
NUJ176	daf-16(mg54)_D1	0.866667
NUJ176	daf-16(mg54)_D1	0.903846
NUJ176	daf-16(mg54)_D1	0.544554
NUJ176	daf-16(mg54)_D1	0.57931
NUJ176	daf-16(mg54)_D1	0.679012
NUJ176	daf-16(mg54)_D1	0.723077
NUJ176	daf-16(mg54)_D5_E.coli	0.140496
NUJ176	daf-16(mg54)_D5_E.coli	0.135802
NUJ176	daf-16(mg54)_D5_E.coli	0.23913
NUJ176	daf-16(mg54)_D5_E.coli	0.217391
NUJ176	daf-16(mg54)_D5_E.coli	0.280702
NUJ176	daf-16(mg54)_D5_E.coli	0.136986
NUJ176	daf-16(mg54)_D5_E.coli	0.214815
NUJ176	daf-16(mg54)_D5_E.coli	0.108108
NUJ176	daf-16(mg54)_D5_E.coli	0.0701754
NUJ176	daf-16(mg54)_D5_Lb.reuteri	0.864865
NUJ176	daf-16(mg54)_D5_Lb.reuteri	0.742857
NUJ176	daf-16(mg54)_D5_Lb.reuteri	0.744186
NUJ176	daf-16(mg54)_D5_Lb.reuteri	0.882353
NUJ176	daf-16(mg54)_D5_Lb.reuteri	0.666667
NUJ176	daf-16(mg54)_D5_Lb.reuteri	0.760417
NUJ176	daf-16(mg54)_D5_Lb.reuteri	0.428571
NUJ176	daf-16(mg54)_D5_Lb.reuteri	0.705882
NUJ176	daf-16(mg54)_D5_Lb.reuteri	0.641304
NUJ176	daf-16(mg54)_D5_Lb.reuteri	0.644231
NUJ298	daf-16(knj36)_D1	0.626374
NUJ298	daf-16(knj36)_D1	0.716049
NUJ298	daf-16(knj36)_D1	0.358974
NUJ298	daf-16(knj36)_D1	0.488889
NUJ298	daf-16(knj36)_D1	0.680556
NUJ298	daf-16(knj36)_D1	0.26087
NUJ298	daf-16(knj36)_D1	0.339623
NUJ298	daf-16(knj36)_D1	0.47619
NUJ298	daf-16(knj36)_D1	0.534884
NUJ298	daf-16(knj36)_D1	0.470588
NUJ298	daf-16(knj36)_D1	0.314286
NUJ298	daf-16(knj36)_D1	0.31875
NUJ298	daf-16(knj36)_D1	0.331288
NUJ298	daf-16(knj36)_D1	0.24498
NUJ298	daf-16(knj36)_D5_E.coli	0.578125
NUJ298	daf-16(knj36)_D5_E.coli	0.364486
NUJ298	daf-16(knj36)_D5_E.coli	0.215909
NUJ298	daf-16(knj36)_D5_E.coli	0.183824
NUJ298	daf-16(knj36)_D5_E.coli	0.142857
NUJ298	daf-16(knj36)_D5_E.coli	0.291429
NUJ298	daf-16(knj36)_D5_E.coli	0.118056
NUJ298	daf-16(knj36)_D5_E.coli	0.32093
NUJ298	daf-16(knj36)_D5_E.coli	0.158824
NUJ298	daf-16(knj36)_D5_E.coli	0.270677
NUJ298	daf-16(knj36)_D5_Lb.reuteri	0.833333
NUJ298	daf-16(knj36)_D5_Lb.reuteri	0.873418
NUJ298	daf-16(knj36)_D5_Lb.reuteri	0.773913
NUJ298	daf-16(knj36)_D5_Lb.reuteri	0.619835
NUJ298	daf-16(knj36)_D5_Lb.reuteri	0.6
NUJ298	daf-16(knj36)_D5_Lb.reuteri	0.37037
NUJ298	daf-16(knj36)_D5_Lb.reuteri	0.48
NUJ298	daf-16(knj36)_D5_Lb.reuteri	0.375
NUJ298	daf-16(knj36)_D5_Lb.reuteri	0.591304
NUJ298	daf-16(knj36)_D5_Lb.reuteri	0.673077
NUJ298	daf-16(knj36)_D5_Lb.reuteri	0.765432
NUJ298	daf-16(knj36)_D5_Lb.reuteri	0.819876
NUJ298	daf-16(knj36)_D5_Lb.reuteri	0.411765
NUJ298	daf-16(knj36)_D5_Lb.reuteri	0.459677
NUJ298	daf-16(knj36)_D5_Lb.reuteri	0.793103
NUJ298	daf-16(knj36)_D5_Lb.reuteri	0.77027
