# Supplementary material for: Bacterial diet affects the age-dependent decline of associative learning in Caenorhabditis elegans
Source: eLife. 2023 May 30;12:e81418. doi: 10.7554/eLife.81418 (PMC10229132; doi:10.7554/eLife.81418)
Supplement: Figure 8—source data 2. [file elife-81418-fig8-data2.xlsx]

## Sheet: Fig8C
Source data for Figure 8C
Strain	Condition	Performance_index
N2	wt_D1	0.459677
N2	wt_D1	0.87395
N2	wt_D1	0.75
N2	wt_D1	0.767123
N2	wt_D1	0.694215
N2	wt_D1	0.847826
N2	wt_D1	0.73913
N2	wt_D1	0.878788
N2	wt_D1	0.809524
N2	wt_D1	0.918605
N2	wt_D1	0.934783
N2	wt_D1	0.964286
N2	wt_D1	0.810127
N2	wt_D1	0.918919
N2	wt_D1	0.91358
N2	wt_D1	0.825
N2	wt_D1	0.732143
N2	wt_D1	0.753425
N2	wt_D1	0.88172
N2	wt_D1	0.816901
N2	wt_D1	0.910112
N2	wt_D5_E.coli	0.263736
N2	wt_D5_E.coli	0.313131
N2	wt_D5_E.coli	0.620253
N2	wt_D5_E.coli	0.493827
N2	wt_D5_E.coli	0.405405
N2	wt_D5_E.coli	0.369863
N2	wt_D5_E.coli	0.264
N2	wt_D5_E.coli	0.309353
N2	wt_D5_E.coli	0.560976
N2	wt_D5_E.coli	0.425676
N2	wt_D5_E.coli	0.606557
N2	wt_D5_E.coli	0.465347
N2	wt_D5_E.coli	0.155963
N2	wt_D5_E.coli	0.547619
N2	wt_D5_E.coli	0.43662
N2	wt_D5_E.coli	0.536
N2	wt_D5_E.coli	0.576271
N2	wt_D5_E.coli	0.4625
N2	wt_D5_E.coli	0.769231
N2	wt_D5_Lb.reuteri	0.852459
N2	wt_D5_Lb.reuteri	0.583333
N2	wt_D5_Lb.reuteri	0.917874
N2	wt_D5_Lb.reuteri	0.834437
N2	wt_D5_Lb.reuteri	0.98
N2	wt_D5_Lb.reuteri	0.880435
N2	wt_D5_Lb.reuteri	0.82069
N2	wt_D5_Lb.reuteri	0.904255
N2	wt_D5_Lb.reuteri	0.666667
N2	wt_D5_Lb.reuteri	0.69863
N2	wt_D5_Lb.reuteri	0.821053
N2	wt_D5_Lb.reuteri	0.916667
N2	wt_D5_Lb.reuteri	0.789474
N2	wt_D5_Lb.reuteri	0.76087
N2	wt_D5_Lb.reuteri	0.487179
N2	wt_D5_Lb.reuteri	0.612613
N2	wt_D5_Lb.reuteri	0.864035
N2	wt_D5_Lb.reuteri	0.890625
N2	wt_D5_Lb.reuteri	0.746377
N2	wt_D5_Lb.reuteri	0.641026
N2	wt_D5_Lb.reuteri	0.71875
N2	wt_D5_Lb.reuteri	0.826291
CF1038	daf-16_D1	0.656934
CF1038	daf-16_D1	0.480315
CF1038	daf-16_D1	0.758333
CF1038	daf-16_D1	0.72
CF1038	daf-16_D1	0.575472
CF1038	daf-16_D1	0.732759
CF1038	daf-16_D1	0.647059
CF1038	daf-16_D1	0.236842
CF1038	daf-16_D1	0.368421
CF1038	daf-16_D1	0.392857
CF1038	daf-16_D1	0.367347
CF1038	daf-16_D1	0.511811
CF1038	daf-16_D1	0.627451
CF1038	daf-16_D1	0.642857
CF1038	daf-16_D1	0.587413
CF1038	daf-16_D1	0.753086
CF1038	daf-16_D1	0.768293
CF1038	daf-16_D1	0.333333
CF1038	daf-16_D1	0.413043
CF1038	daf-16_D1	0.7125
CF1038	daf-16_D1	0.703125
CF1038	daf-16_D1	0.666667
CF1038	daf-16_D1	0.651685
CF1038	daf-16_D5_E.coli	0.383178
CF1038	daf-16_D5_E.coli	0.235294
CF1038	daf-16_D5_E.coli	0.16
CF1038	daf-16_D5_E.coli	0.0897436
CF1038	daf-16_D5_E.coli	0.2
CF1038	daf-16_D5_E.coli	0.2
CF1038	daf-16_D5_E.coli	0.333333
CF1038	daf-16_D5_E.coli	0.0930233
CF1038	daf-16_D5_E.coli	0.47191
CF1038	daf-16_D5_E.coli	0.330357
CF1038	daf-16_D5_E.coli	0.33121
CF1038	daf-16_D5_E.coli	0.401961
CF1038	daf-16_D5_E.coli	0.223214
CF1038	daf-16_D5_E.coli	0.457944
CF1038	daf-16_D5_E.coli	0.322917
CF1038	daf-16_D5_E.coli	0.228916
CF1038	daf-16_D5_E.coli	0.156522
CF1038	daf-16_D5_E.coli	0.387097
CF1038	daf-16_D5_E.coli	0.296703
CF1038	daf-16_D5_Lb.reuteri	0.745098
CF1038	daf-16_D5_Lb.reuteri	0.684211
CF1038	daf-16_D5_Lb.reuteri	0.683544
CF1038	daf-16_D5_Lb.reuteri	0.57971
CF1038	daf-16_D5_Lb.reuteri	0.55102
CF1038	daf-16_D5_Lb.reuteri	0.542857
CF1038	daf-16_D5_Lb.reuteri	0.623529
CF1038	daf-16_D5_Lb.reuteri	0.65625
CF1038	daf-16_D5_Lb.reuteri	0.401099
CF1038	daf-16_D5_Lb.reuteri	0.536232
CF1038	daf-16_D5_Lb.reuteri	0.26087
CF1038	daf-16_D5_Lb.reuteri	0.285714
CF1038	daf-16_D5_Lb.reuteri	0.396226
CF1038	daf-16_D5_Lb.reuteri	0.44186
CF1038	daf-16_D5_Lb.reuteri	0.539683
CF1038	daf-16_D5_Lb.reuteri	0.338983
CF1038	daf-16_D5_Lb.reuteri	0.419355
CF1038	daf-16_D5_Lb.reuteri	0.8
CF1038	daf-16_D5_Lb.reuteri	0.495146
CF1038	daf-16_D5_Lb.reuteri	0.35443
CF1038	daf-16_D5_Lb.reuteri	0.490385
CF1038	daf-16_D5_Lb.reuteri	0.497537
CF1038	daf-16_D5_Lb.reuteri	0.536
CF1038	daf-16_D5_Lb.reuteri	0.336406
CF1038	daf-16_D5_Lb.reuteri	0.385714
NUJ306	daf-16bpRescue_D1	0.921212
NUJ306	daf-16bpRescue_D1	0.891566
NUJ306	daf-16bpRescue_D1	0.923664
NUJ306	daf-16bpRescue_D1	0.846154
NUJ306	daf-16bpRescue_D1	0.857143
NUJ306	daf-16bpRescue_D1	0.869159
NUJ306	daf-16bpRescue_D1	0.84
NUJ306	daf-16bpRescue_D1	0.876923
NUJ306	daf-16bpRescue_D1	0.630952
NUJ306	daf-16bpRescue_D5_E.coli	0.408163
NUJ306	daf-16bpRescue_D5_E.coli	0.55
NUJ306	daf-16bpRescue_D5_E.coli	0.168539
NUJ306	daf-16bpRescue_D5_E.coli	0.460396
NUJ306	daf-16bpRescue_D5_E.coli	0.456522
NUJ306	daf-16bpRescue_D5_E.coli	0.391304
NUJ306	daf-16bpRescue_D5_E.coli	0.178571
NUJ306	daf-16bpRescue_D5_E.coli	0.241379
NUJ306	daf-16bpRescue_D5_Lb.reuteri	0.925
NUJ306	daf-16bpRescue_D5_Lb.reuteri	0.947368
NUJ306	daf-16bpRescue_D5_Lb.reuteri	0.846154
NUJ306	daf-16bpRescue_D5_Lb.reuteri	0.975
NUJ306	daf-16bpRescue_D5_Lb.reuteri	0.914439
NUJ306	daf-16bpRescue_D5_Lb.reuteri	0.960591
NUJ306	daf-16bpRescue_D5_Lb.reuteri	0.8
NUJ306	daf-16bpRescue_D5_Lb.reuteri	0.872
NUJ306	daf-16bpRescue_D5_Lb.reuteri	0.886598
NUJ306	daf-16bpRescue_D5_Lb.reuteri	0.925373
NUJ306	daf-16bpRescue_D5_Lb.reuteri	0.6
NUJ306	daf-16bpRescue_D5_Lb.reuteri	0.703704
NUJ306	daf-16bpRescue_D5_Lb.reuteri	0.655172
NUJ368	PharynxRescue_D1	0.87234
NUJ368	PharynxRescue_D1	0.705882
NUJ368	PharynxRescue_D1	0.584158
NUJ368	PharynxRescue_D1	0.766129
NUJ368	PharynxRescue_D1	0.770492
NUJ368	PharynxRescue_D1	0.535088
NUJ368	PharynxRescue_D1	0.792453
NUJ368	PharynxRescue_D1	0.642857
NUJ368	PharynxRescue_D1	0.67033
NUJ368	PharynxRescue_D1	0.747475
NUJ368	PharynxRescue_D5_E.coli	0.201613
NUJ368	PharynxRescue_D5_E.coli	0.125984
NUJ368	PharynxRescue_D5_E.coli	0.101449
NUJ368	PharynxRescue_D5_E.coli	0.284211
NUJ368	PharynxRescue_D5_E.coli	0.318681
NUJ368	PharynxRescue_D5_E.coli	0.184397
NUJ368	PharynxRescue_D5_E.coli	0.364286
NUJ368	PharynxRescue_D5_E.coli	0.239766
NUJ368	PharynxRescue_D5_Lb.reuteri	0.222222
NUJ368	PharynxRescue_D5_Lb.reuteri	0.453202
NUJ368	PharynxRescue_D5_Lb.reuteri	0.339806
NUJ368	PharynxRescue_D5_Lb.reuteri	0.261538
NUJ368	PharynxRescue_D5_Lb.reuteri	0.559671
NUJ368	PharynxRescue_D5_Lb.reuteri	0.580311
NUJ368	PharynxRescue_D5_Lb.reuteri	0.229358
NUJ368	PharynxRescue_D5_Lb.reuteri	0.557047
NUJ368	PharynxRescue_D5_Lb.reuteri	0.392593
NUJ372	NeuronRescue_D1	0.783784
NUJ372	NeuronRescue_D1	0.733333
NUJ372	NeuronRescue_D1	0.764706
NUJ372	NeuronRescue_D1	0.855556
NUJ372	NeuronRescue_D1	0.722222
NUJ372	NeuronRescue_D1	0.881188
NUJ372	NeuronRescue_D1	0.809524
NUJ372	NeuronRescue_D1	0.824561
NUJ372	NeuronRescue_D1	0.731343
NUJ372	NeuronRescue_D1	0.823529
NUJ372	NeuronRescue_D1	0.806818
NUJ372	NeuronRescue_D1	0.813953
NUJ372	NeuronRescue_D1	0.945652
NUJ372	NeuronRescue_D5_E.coli	0.707317
NUJ372	NeuronRescue_D5_E.coli	0.646154
NUJ372	NeuronRescue_D5_E.coli	0.527027
NUJ372	NeuronRescue_D5_E.coli	0.706667
NUJ372	NeuronRescue_D5_E.coli	0.606742
NUJ372	NeuronRescue_D5_E.coli	0.666667
NUJ372	NeuronRescue_D5_E.coli	0.451128
NUJ372	NeuronRescue_D5_E.coli	0.543478
NUJ372	NeuronRescue_D5_E.coli	0.5
NUJ372	NeuronRescue_D5_E.coli	0.456693
NUJ372	NeuronRescue_D5_Lb.reuteri	0.802817
NUJ372	NeuronRescue_D5_Lb.reuteri	0.697674
NUJ372	NeuronRescue_D5_Lb.reuteri	0.692308
NUJ372	NeuronRescue_D5_Lb.reuteri	0.707317
NUJ372	NeuronRescue_D5_Lb.reuteri	0.739837
NUJ372	NeuronRescue_D5_Lb.reuteri	0.771429
NUJ372	NeuronRescue_D5_Lb.reuteri	0.773913
NUJ372	NeuronRescue_D5_Lb.reuteri	0.842105
NUJ372	NeuronRescue_D5_Lb.reuteri	0.713235
NUJ372	NeuronRescue_D5_Lb.reuteri	0.555556
NUJ372	NeuronRescue_D5_Lb.reuteri	0.657534
NUJ372	NeuronRescue_D5_Lb.reuteri	0.803738
NUJ373	MuscleRescue_D1	0.724138
NUJ373	MuscleRescue_D1	0.470588
NUJ373	MuscleRescue_D1	0.745455
NUJ373	MuscleRescue_D1	0.648438
NUJ373	MuscleRescue_D1	0.731959
NUJ373	MuscleRescue_D1	0.613636
NUJ373	MuscleRescue_D1	0.87069
NUJ373	MuscleRescue_D1	0.552239
NUJ373	MuscleRescue_D1	0.661538
NUJ373	MuscleRescue_D1	0.647059
NUJ373	MuscleRescue_D1	0.795699
NUJ373	MuscleRescue_D1	0.767442
NUJ373	MuscleRescue_D1	0.886792
NUJ373	MuscleRescue_D5_E.coli	0.271429
NUJ373	MuscleRescue_D5_E.coli	0.175258
NUJ373	MuscleRescue_D5_E.coli	0.210526
NUJ373	MuscleRescue_D5_E.coli	0.330357
NUJ373	MuscleRescue_D5_E.coli	0.198758
NUJ373	MuscleRescue_D5_E.coli	0.115646
NUJ373	MuscleRescue_D5_E.coli	0.0940171
NUJ373	MuscleRescue_D5_E.coli	0.244318
NUJ373	MuscleRescue_D5_E.coli	0.196721
NUJ373	MuscleRescue_D5_E.coli	0.162791
NUJ373	MuscleRescue_D5_E.coli	0.343511
NUJ373	MuscleRescue_D5_Lb.reuteri	0.5
NUJ373	MuscleRescue_D5_Lb.reuteri	0.4375
NUJ373	MuscleRescue_D5_Lb.reuteri	0.627119
NUJ373	MuscleRescue_D5_Lb.reuteri	0.361111
NUJ373	MuscleRescue_D5_Lb.reuteri	0.711864
NUJ373	MuscleRescue_D5_Lb.reuteri	0.636364
NUJ373	MuscleRescue_D5_Lb.reuteri	0.654054
NUJ373	MuscleRescue_D5_Lb.reuteri	0.732057
NUJ373	MuscleRescue_D5_Lb.reuteri	0.788889
NUJ373	MuscleRescue_D5_Lb.reuteri	0.258065
NUJ373	MuscleRescue_D5_Lb.reuteri	0.748252
