# Supplementary material for: Bacterial diet affects the age-dependent decline of associative learning in Caenorhabditis elegans
Source: eLife. 2023 May 30;12:e81418. doi: 10.7554/eLife.81418 (PMC10229132; doi:10.7554/eLife.81418)
Supplement: Figure 8—source data 3. [file elife-81418-fig8-data3.xlsx]

## Sheet: Fig8D
Source data for Figure 8D
Strain	Condition	Performance index
N2	wt_D1_IAA(-)_IAA(-)_IAA(-)	0.649425
N2	wt_D1_IAA(-)_IAA(-)	0.341615
N2	wt_D1_IAA(-)_IAA(-)	0.739884
N2	wt_D1_IAA(-)_IAA(-)	0.616438
N2	wt_D1_IAA(-)_IAA(-)	0.760797
N2	wt_D1_IAA(-)_IAA(-)	0.793269
N2	wt_D1_IAA(-)_IAA(-)	0.777174
N2	wt_D1_IAA(-)_IAA(-)	0.546296
N2	wt_D1_IAA(-)_IAA(-)	0.547486
N2	wt_D1_IAA(-)_IAA(-)	0.891429
N2	wt_D1_IAA(-)_IAA(-)	0.751773
N2	wt_D1_IAA(-)_IAA(-)	0.636364
N2	wt_D5_E.coli_IAA(-)_IAA(-)	0.318841
N2	wt_D5_E.coli_IAA(-)_IAA(-)	0.257576
N2	wt_D5_E.coli_IAA(-)_IAA(-)	0.287129
N2	wt_D5_E.coli_IAA(-)_IAA(-)	0.53012
N2	wt_D5_E.coli_IAA(-)_IAA(-)	0.48538
N2	wt_D5_E.coli_IAA(-)_IAA(-)	0.408163
N2	wt_D5_E.coli_IAA(-)_IAA(-)	0.44385
N2	wt_D5_E.coli_IAA(-)_IAA(-)	0.294574
N2	wt_D5_E.coli_IAA(-)_IAA(-)	0.252252
N2	wt_D5_E.coli_IAA(-)_IAA(-)	0.397661
N2	wt_D5_E.coli_IAA(-)_IAA(-)	0.230769
N2	wt_D5_E.coli_IAA(-)_IAA(-)	0.129032
N2	wt_D5_Lb.reuteri_IAA(-)_IAA(-)	0.470149
N2	wt_D5_Lb.reuteri_IAA(-)_IAA(-)	0.617886
N2	wt_D5_Lb.reuteri_IAA(-)_IAA(-)	0.591549
N2	wt_D5_Lb.reuteri_IAA(-)_IAA(-)	0.530769
N2	wt_D5_Lb.reuteri_IAA(-)_IAA(-)	0.59322
N2	wt_D5_Lb.reuteri_IAA(-)_IAA(-)	0.409091
N2	wt_D5_Lb.reuteri_IAA(-)_IAA(-)	0.491803
N2	wt_D5_Lb.reuteri_IAA(-)_IAA(-)	0.87013
N2	wt_D5_Lb.reuteri_IAA(-)_IAA(-)	0.81203
N2	wt_D5_Lb.reuteri_IAA(-)_IAA(-)	0.714286
NUJ559	daf-16degron_D5_Lb.reuteri_IAA(-)_IAA(-)	0.465116
NUJ559	daf-16degron_D5_Lb.reuteri_IAA(-)_IAA(-)	0.543478
NUJ559	daf-16degron_D5_Lb.reuteri_IAA(-)_IAA(-)	0.443182
NUJ559	daf-16degron_D5_Lb.reuteri_IAA(-)_IAA(-)	0.606061
NUJ559	daf-16degron_D5_Lb.reuteri_IAA(-)_IAA(-)	0.614679
NUJ559	daf-16degron_D5_Lb.reuteri_IAA(-)_IAA(-)	0.735632
NUJ559	daf-16degron_D5_Lb.reuteri_IAA(-)_IAA(-)	0.561404
NUJ559	daf-16degron_D5_Lb.reuteri_IAA(-)_IAA(-)	0.380952
NUJ559	daf-16degron_D5_Lb.reuteri_IAA(-)_IAA(-)	0.74
NUJ559	daf-16degron_D5_Lb.reuteri_IAA(-)_IAA(-)	0.516854
NUJ559	daf-16degron_D5_Lb.reuteri_IAA(-)_IAA(-)	0.605263
NUJ559	daf-16degron_D5_Lb.reuteri_IAA(-)_IAA(-)	0.7375
NUJ559	daf-16degron_D5_Lb.reuteri_IAA(+)_IAA(-)	0.293233
NUJ559	daf-16degron_D5_Lb.reuteri_IAA(+)_IAA(-)	0.339623
NUJ559	daf-16degron_D5_Lb.reuteri_IAA(+)_IAA(-)	0.714286
NUJ559	daf-16degron_D5_Lb.reuteri_IAA(+)_IAA(-)	0.616667
NUJ559	daf-16degron_D5_Lb.reuteri_IAA(+)_IAA(-)	0.652632
NUJ559	daf-16degron_D5_Lb.reuteri_IAA(+)_IAA(-)	0.685535
NUJ559	daf-16degron_D5_Lb.reuteri_IAA(+)_IAA(-)	0.242424
NUJ559	daf-16degron_D5_Lb.reuteri_IAA(+)_IAA(-)	0.701422
NUJ559	daf-16degron_D5_Lb.reuteri_IAA(+)_IAA(-)	0.703448
NUJ559	daf-16degron_D5_Lb.reuteri_IAA(-)_IAA(+)	0.213235
NUJ559	daf-16degron_D5_Lb.reuteri_IAA(-)_IAA(+)	0.19084
NUJ559	daf-16degron_D5_Lb.reuteri_IAA(-)_IAA(+)	0.348624
NUJ559	daf-16degron_D5_Lb.reuteri_IAA(-)_IAA(+)	0.309392
NUJ559	daf-16degron_D5_Lb.reuteri_IAA(-)_IAA(+)	0.297778
NUJ559	daf-16degron_D5_Lb.reuteri_IAA(-)_IAA(+)	0.26087
NUJ559	daf-16degron_D5_Lb.reuteri_IAA(-)_IAA(+)	0.241071
NUJ559	daf-16degron_D5_Lb.reuteri_IAA(-)_IAA(+)	0.289593
NUJ559	daf-16degron_D5_Lb.reuteri_IAA(-)_IAA(+)	0.46087
NUJ559	daf-16degron_D5_Lb.reuteri_IAA(-)_IAA(+)	0.109677
NUJ559	daf-16degron_D5_Lb.reuteri_IAA(-)_IAA(+)	0.125
NUJ559	daf-16degron_D5_Lb.reuteri_IAA(-)_IAA(+)	0.37594
NUJ559	daf-16degron_D5_Lb.reuteri_IAA(+)_IAA(+)	0.159236
NUJ559	daf-16degron_D5_Lb.reuteri_IAA(+)_IAA(+)	0.102151
NUJ559	daf-16degron_D5_Lb.reuteri_IAA(+)_IAA(+)	0.123288
NUJ559	daf-16degron_D5_Lb.reuteri_IAA(+)_IAA(+)	0.454545
NUJ559	daf-16degron_D5_Lb.reuteri_IAA(+)_IAA(+)	0.363248
NUJ559	daf-16degron_D5_Lb.reuteri_IAA(+)_IAA(+)	0.26087
NUJ559	daf-16degron_D5_Lb.reuteri_IAA(+)_IAA(+)	0.205882
NUJ559	daf-16degron_D5_Lb.reuteri_IAA(+)_IAA(+)	0.404255
NUJ559	daf-16degron_D5_Lb.reuteri_IAA(+)_IAA(+)	0.252252
NUJ559	daf-16degron_D5_Lb.reuteri_IAA(+)_IAA(+)	0.261682
