# Supplementary material for: Bacterial diet affects the age-dependent decline of associative learning in Caenorhabditis elegans
Source: eLife. 2023 May 30;12:e81418. doi: 10.7554/eLife.81418 (PMC10229132; doi:10.7554/eLife.81418)
Supplement: Figure 9—figure supplement 2—source data 1. [file elife-81418-fig9-figsupp2-data1.xlsx]

## Sheet: Fig9-S2
Source data 1 for Figure 9-Figure supplement 2A
PC1
Rank	Gene ID	% condtribution
1	WBGene00016088	4.11468
2	WBGene00017199	3.71585
3	WBGene00007440	3.43114
4	WBGene00015573	3.39511
5	WBGene00008850	3.28789
6	WBGene00044292	3.23837
7	WBGene00016670	3.19119
8	WBGene00015076	3.12241
9	WBGene00000013	3.10391
10	WBGene00001387	3.04985
11	WBGene00000503	2.95721
12	WBGene00010473	2.95232
13	WBGene00004997	2.92819
14	WBGene00000301	2.87485
15	WBGene00001075	2.86861
16	WBGene00012176	2.8057
17	WBGene00003473	2.74243
18	WBGene00045416	2.73814
19	WBGene00013079	2.6644
20	WBGene00014173	2.63922
21	WBGene00045457	2.57381
22	WBGene00000556	2.56706
23	WBGene00009212	2.48323
24	WBGene00044206	2.46619
25	WBGene00015046	2.40911
26	WBGene00001397	2.37913
27	WBGene00012683	2.36854
28	WBGene00000558	2.34031
29	WBGene00022349	2.33188
30	WBGene00004818	2.29859
31	WBGene00007459	2.26635
32	WBGene00044472	2.25713
33	WBGene00009637	2.2383
34	WBGene00017127	2.23132
35	WBGene00017539	2.22042
36	WBGene00008577	2.19866
37	WBGene00012878	2.1968
38	WBGene00011435	2.17367
39	WBGene00043067	2.13465
40	WBGene00000535	2.13309
41	WBGene00020438	2.11309
42	WBGene00011869	2.10987
43	WBGene00002263	2.09303
44	WBGene00008388	2.08782
45	WBGene00000928	2.0782
46	WBGene00016745	2.0768
47	WBGene00194695	2.07347
48	WBGene00015355	2.06852
49	WBGene00021703	2.05384
50	WBGene00009213	2.05232
51	WBGene00021491	2.03499
52	WBGene00015828	2.02492
53	WBGene00004814	2.00656
54	WBGene00016823	2.00205
55	WBGene00012961	1.99809
56	WBGene00011231	1.96742
57	WBGene00012899	1.96597
58	WBGene00020261	1.95635
59	WBGene00016695	1.94875
60	WBGene00003977	1.9401
61	WBGene00010158	1.93766
62	WBGene00001076	1.93617
63	WBGene00015610	1.93304
64	WBGene00004815	1.93215
65	WBGene00010495	1.93037
66	WBGene00004798	1.91648
67	WBGene00001858	1.91553
68	WBGene00044530	1.91069
69	WBGene00010666	1.90149
70	WBGene00014162	1.89693
71	WBGene00022665	1.89089
72	WBGene00010185	1.88498
73	WBGene00022033	1.88411
74	WBGene00016568	1.87128
75	WBGene00014199	1.86861
76	WBGene00011190	1.85997
77	WBGene00044644	1.84621
78	WBGene00011486	1.83375
79	WBGene00010746	1.82916
80	WBGene00017390	1.82851
81	WBGene00018903	1.82764
82	WBGene00017755	1.79595
83	WBGene00001817	1.79523
84	WBGene00019605	1.78631
85	WBGene00002016	1.78377
86	WBGene00000463	1.78188
87	WBGene00020205	1.77552
88	WBGene00007162	1.7738
89	WBGene00021576	1.76931
90	WBGene00020379	1.75989
91	WBGene00022441	1.75881
92	WBGene00004155	1.75659
93	WBGene00021005	1.75541
94	WBGene00007225	1.7493
95	WBGene00044901	1.74656
96	WBGene00010953	1.74562
97	WBGene00007642	1.7455
98	WBGene00019472	1.74277
99	WBGene00016204	1.73802
100	WBGene00010504	1.73377
101	WBGene00009606	1.73285
102	WBGene00007605	1.73197
103	WBGene00008825	1.7309
104	WBGene00010483	1.72016
105	WBGene00009156	1.71762
106	WBGene00022455	1.71058
107	WBGene00002018	1.70791
108	WBGene00016457	1.70354
109	WBGene00015136	1.70062
110	WBGene00016845	1.69811
111	WBGene00002085	1.69426
112	WBGene00007858	1.69238
113	WBGene00077593	1.66364
114	WBGene00021928	1.65908
115	WBGene00022112	1.65792
116	WBGene00021658	1.65305
117	WBGene00010667	1.65305
118	WBGene00044212	1.65019
119	WBGene00007991	1.64976
120	WBGene00044772	1.64896
121	WBGene00017134	1.6439
122	WBGene00007765	1.64269
123	WBGene00011010	1.6264
124	WBGene00235295	1.61573
125	WBGene00015683	1.60526
126	WBGene00003111	1.60453
127	WBGene00021263	1.59717
128	WBGene00020758	1.5904
129	WBGene00004157	1.58945
130	WBGene00021557	1.58305
131	WBGene00016767	1.57969
132	WBGene00006956	1.57115
133	WBGene00001388	1.56621
134	WBGene00021818	1.56385
135	WBGene00007506	1.56287
136	WBGene00016785	1.55194
137	WBGene00008027	1.55134
138	WBGene00013086	1.54731
139	WBGene00003096	1.54669
140	WBGene00007391	1.54492
141	WBGene00003784	1.54322
142	WBGene00012431	1.54229
143	WBGene00012564	1.53826
144	WBGene00008535	1.53473
145	WBGene00019703	1.52303
146	WBGene00012239	1.52286
147	WBGene00009222	1.52088
148	WBGene00012020	1.52063
149	WBGene00016178	1.51602
150	WBGene00004786	1.514
151	WBGene00077543	1.51351
152	WBGene00001104	1.50928
153	WBGene00017713	1.50903
154	WBGene00013254	1.50826
155	WBGene00010005	1.50689
156	WBGene00001606	1.50405
157	WBGene00016520	1.49388
158	WBGene00013319	1.49258
159	WBGene00018242	1.49222
160	WBGene00011898	1.49095
161	WBGene00008563	1.48667
162	WBGene00014097	1.48122
163	WBGene00011451	1.47967
164	WBGene00018456	1.47595
165	WBGene00019606	1.47297
166	WBGene00010149	1.46782
167	WBGene00002105	1.46657
168	WBGene00015899	1.46514
169	WBGene00017135	1.46474
170	WBGene00015102	1.46442
171	WBGene00011063	1.45869
172	WBGene00001186	1.4578
173	WBGene00009573	1.45769
174	WBGene00011809	1.45648
175	WBGene00002125	1.4557
176	WBGene00008823	1.45317
177	WBGene00017843	1.45209
178	WBGene00021366	1.45188
179	WBGene00004750	1.4506
180	WBGene00020073	1.44988
181	WBGene00018489	1.44926
182	WBGene00007173	1.4484
183	WBGene00019815	1.44698
184	WBGene00012146	1.44656
185	WBGene00017133	1.44566
186	WBGene00018189	1.44426
187	WBGene00013596	1.44274
188	WBGene00021596	1.44211
189	WBGene00009899	1.44151
190	WBGene00009551	1.44131
191	WBGene00010051	1.43874
192	WBGene00008170	1.43525
193	WBGene00194985	1.43395
194	WBGene00004813	1.43169
195	WBGene00007709	1.42761
196	WBGene00002124	1.4245
197	WBGene00020080	1.42306
198	WBGene00015582	1.4226
199	WBGene00010542	1.42233
200	WBGene00017838	1.42066
201	WBGene00022060	1.41755
202	WBGene00009662	1.41701
203	WBGene00016822	1.41638
204	WBGene00014117	1.41495
205	WBGene00008002	1.41269
206	WBGene00019788	1.40915
207	WBGene00008971	1.4087
208	WBGene00044471	1.40711
209	WBGene00021701	1.4065
210	WBGene00019791	1.40614
211	WBGene00001949	1.40433
212	WBGene00011957	1.40358
213	WBGene00011642	1.40355
214	WBGene00011505	1.40274
215	WBGene00008357	1.40194
216	WBGene00001607	1.40005
217	WBGene00010609	1.39997
218	WBGene00011986	1.39872
219	WBGene00003879	1.397
220	WBGene00016824	1.39323
221	WBGene00015455	1.39323
222	WBGene00011475	1.39234
223	WBGene00003783	1.39157
224	WBGene00012021	1.38963
225	WBGene00007097	1.38785
226	WBGene00019153	1.38739
227	WBGene00000465	1.38513
228	WBGene00012277	1.38492
229	WBGene00013425	1.38428
230	WBGene00016486	1.3829
231	WBGene00009640	1.38245
232	WBGene00020025	1.37981
233	WBGene00021704	1.37917
234	WBGene00008080	1.3789
235	WBGene00021763	1.37861
236	WBGene00219313	1.37468
237	WBGene00045418	1.36857
238	WBGene00013799	1.36821
239	WBGene00016359	1.36795
240	WBGene00004984	1.36044
241	WBGene00011242	1.36022
242	WBGene00007919	1.35741
243	WBGene00022236	1.3548
244	WBGene00021721	1.35414
245	WBGene00045038	1.35403
246	WBGene00008784	1.35161
247	WBGene00006869	1.34784
248	WBGene00021468	1.34392
249	WBGene00013900	1.34273
250	WBGene00001820	1.34208
251	WBGene00010568	1.34204
252	WBGene00020941	1.34142
253	WBGene00006804	1.34119
254	WBGene00004821	1.3411
255	WBGene00019811	1.33937
256	WBGene00017128	1.33866
257	WBGene00019993	1.33436
258	WBGene00235093	1.33369
259	WBGene00004078	1.33331
260	WBGene00006618	1.32942
261	WBGene00021035	1.3275
262	WBGene00019705	1.32655
263	WBGene00001938	1.32397
264	WBGene00000690	1.32329
265	WBGene00006868	1.32291
266	WBGene00020684	1.32171
267	WBGene00014006	1.32072
268	WBGene00001841	1.32049
269	WBGene00020509	1.31614
270	WBGene00011040	1.31548
271	WBGene00016380	1.31384
272	WBGene00022203	1.31123
273	WBGene00000388	1.3109
274	WBGene00015180	1.3104
275	WBGene00016262	1.30833
276	WBGene00000870	1.30672
277	WBGene00001377	1.30427
278	WBGene00022357	1.30242
279	WBGene00018099	1.30065
280	WBGene00018006	1.29692
281	WBGene00019200	1.29689
282	WBGene00003373	1.29593
283	WBGene00006552	1.29585
284	WBGene00021966	1.29505
285	WBGene00023493	1.28855
286	WBGene00008440	1.28765
287	WBGene00003763	1.28749
288	WBGene00010195	1.28745
289	WBGene00012841	1.28738
290	WBGene00012844	1.28733
291	WBGene00009215	1.28682
292	WBGene00000913	1.28576
293	WBGene00016485	1.28462
294	WBGene00008526	1.28192
295	WBGene00021336	1.28175
296	WBGene00000914	1.28127
297	WBGene00008824	1.27967
298	WBGene00010808	1.27804
299	WBGene00016219	1.27802
300	WBGene00020455	1.27799
301	WBGene00017263	1.27646
302	WBGene00004334	1.27531
303	WBGene00017202	1.27365
304	WBGene00009245	1.27276
305	WBGene00001831	1.27027
306	WBGene00011981	1.26925
307	WBGene00009627	1.26821
308	WBGene00016788	1.26762
309	WBGene00013008	1.26725
310	WBGene00016138	1.26676
311	WBGene00017676	1.26562
312	WBGene00001950	1.26528
313	WBGene00021687	1.26451
314	WBGene00021299	1.26388
315	WBGene00012444	1.26285
316	WBGene00012935	1.26251
317	WBGene00012546	1.26217
318	WBGene00008434	1.2619
319	WBGene00001481	1.26062
320	WBGene00011434	1.25999
321	WBGene00017488	1.25996
322	WBGene00013862	1.25993
323	WBGene00001647	1.25837
324	WBGene00019130	1.25796
325	WBGene00000396	1.25794
326	WBGene00007647	1.25775
327	WBGene00003395	1.25725
328	WBGene00009639	1.25694
329	WBGene00011970	1.25616
330	WBGene00009186	1.25536
331	WBGene00020433	1.25515
332	WBGene00016295	1.25504
333	WBGene00044526	1.25348
334	WBGene00010553	1.25321
335	WBGene00009287	1.2531
336	WBGene00021913	1.25265
337	WBGene00004027	1.2517
338	WBGene00017986	1.25157
339	WBGene00001639	1.25126
340	WBGene00017952	1.24601
341	WBGene00013013	1.2453
342	WBGene00000409	1.24445
343	WBGene00011410	1.24338
344	WBGene00012106	1.24245
345	WBGene00006539	1.24088
346	WBGene00004241	1.24053
347	WBGene00010546	1.23963
348	WBGene00021988	1.23948
349	WBGene00000156	1.23877
350	WBGene00011388	1.23823
351	WBGene00019905	1.23734
352	WBGene00021419	1.23732
353	WBGene00022572	1.23715
354	WBGene00007131	1.23682
355	WBGene00010470	1.23619
356	WBGene00020285	1.23573
357	WBGene00004353	1.23532
358	WBGene00016970	1.23461
359	WBGene00004392	1.23444
360	WBGene00004351	1.23325
361	WBGene00019341	1.23281
362	WBGene00009698	1.23273
363	WBGene00016425	1.23211
364	WBGene00020218	1.23155
365	WBGene00009218	1.23107
366	WBGene00007139	1.23062
367	WBGene00009733	1.22993
368	WBGene00045251	1.22981
369	WBGene00021070	1.22931
370	WBGene00007643	1.22868
371	WBGene00014034	1.22863
372	WBGene00086546	1.22839
373	WBGene00021795	1.22716
374	WBGene00011489	1.22705
375	WBGene00007697	1.22674
376	WBGene00016427	1.22611
377	WBGene00007660	1.22406
378	WBGene00007348	1.22334
379	WBGene00007885	1.22229
380	WBGene00018606	1.22229
381	WBGene00020771	1.22189
382	WBGene00019947	1.2211
383	WBGene00022418	1.21955
384	WBGene00015849	1.21949
385	WBGene00017358	1.21935
386	WBGene00006446	1.21755
387	WBGene00013100	1.21642
388	WBGene00018337	1.21565
389	WBGene00004721	1.21561
390	WBGene00011733	1.21494
391	WBGene00045401	1.21486
392	WBGene00000250	1.21409
393	WBGene00019971	1.21405
394	WBGene00011985	1.21224
395	WBGene00018424	1.21061
396	WBGene00010080	1.20844
397	WBGene00015353	1.20827
398	WBGene00001577	1.20773
399	WBGene00009701	1.20639
400	WBGene00013538	1.20501
401	WBGene00010081	1.20448
402	WBGene00008789	1.20441
403	WBGene00012385	1.20414
404	WBGene00009067	1.20337
405	WBGene00011615	1.20308
406	WBGene00012002	1.20268
407	WBGene00015008	1.20115
408	WBGene00001449	1.20099
409	WBGene00020652	1.20017
410	WBGene00013432	1.2001
411	WBGene00017712	1.19829
412	WBGene00008157	1.19701
413	WBGene00008944	1.19626
414	WBGene00009113	1.19623
415	WBGene00003183	1.19599
416	WBGene00008464	1.19432
417	WBGene00015134	1.19415
418	WBGene00012182	1.19409
419	WBGene00015529	1.19359
420	WBGene00015301	1.19256
421	WBGene00010053	1.1917
422	WBGene00007921	1.19165
423	WBGene00004354	1.18995
424	WBGene00008536	1.18988
425	WBGene00020064	1.18678
426	WBGene00011292	1.18649
427	WBGene00008196	1.18526
428	WBGene00015852	1.18496
429	WBGene00006568	1.18457
430	WBGene00013208	1.18397
431	WBGene00011509	1.18299
432	WBGene00000058	1.1829
433	WBGene00017143	1.18281
434	WBGene00019806	1.18149
435	WBGene00044370	1.18104
436	WBGene00044692	1.18076
437	WBGene00003610	1.18032
438	WBGene00023427	1.17996
439	WBGene00015850	1.17978
440	WBGene00011625	1.17909
441	WBGene00022452	1.17907
442	WBGene00007589	1.17804
443	WBGene00004820	1.17786
444	WBGene00018909	1.17756
445	WBGene00017459	1.17734
446	WBGene00016939	1.17731
447	WBGene00013380	1.17645
448	WBGene00011988	1.17519
449	WBGene00001435	1.17504
450	WBGene00003231	1.17471
451	WBGene00019595	1.1743
452	WBGene00008782	1.17416
453	WBGene00019799	1.17412
454	WBGene00007500	1.17375
455	WBGene00001436	1.17202
456	WBGene00164968	1.17163
457	WBGene00003865	1.17069
458	WBGene00004217	1.17026
459	WBGene00013926	1.17004
460	WBGene00004889	1.16974
461	WBGene00001105	1.16948
462	WBGene00006562	1.16942
463	WBGene00022669	1.16925
464	WBGene00021781	1.16839
465	WBGene00019357	1.16726
466	WBGene00009805	1.16654
467	WBGene00008219	1.16649
468	WBGene00007979	1.16596
469	WBGene00008113	1.16575
470	WBGene00010691	1.16565
471	WBGene00015842	1.16444
472	WBGene00004827	1.16401
473	WBGene00013658	1.1632
474	WBGene00044953	1.16307
475	WBGene00010054	1.16287
476	WBGene00018819	1.16286
477	WBGene00017584	1.16214
478	WBGene00003184	1.1619
479	WBGene00003228	1.1619
480	WBGene00021654	1.16139
481	WBGene00016156	1.16023
482	WBGene00007299	1.15933
483	WBGene00015233	1.15924
484	WBGene00016783	1.15894
485	WBGene00016192	1.15886
486	WBGene00006406	1.15866
487	WBGene00021269	1.15848
488	WBGene00008427	1.15811
489	WBGene00004765	1.15809
490	WBGene00008859	1.15723
491	WBGene00014250	1.15716
492	WBGene00235267	1.15631
493	WBGene00021661	1.15596
494	WBGene00010234	1.15577
495	WBGene00004242	1.15542
496	WBGene00019953	1.15511
497	WBGene00012695	1.15468
498	WBGene00003083	1.15325
499	WBGene00022721	1.15309
500	WBGene00021123	1.15135
501	WBGene00018774	1.15114
502	WBGene00015327	1.15023
503	WBGene00013231	1.15007
504	WBGene00013583	1.14995
505	WBGene00001934	1.14982
506	WBGene00015733	1.14929
507	WBGene00020286	1.14898
508	WBGene00020710	1.14884
509	WBGene00001666	1.1481
510	WBGene00009508	1.14683
511	WBGene00016169	1.14632
512	WBGene00008665	1.14459
513	WBGene00006619	1.14374
514	WBGene00012650	1.14291
515	WBGene00002368	1.1428
516	WBGene00020544	1.14247
517	WBGene00013127	1.14246
518	WBGene00007140	1.14203
519	WBGene00077490	1.14108
520	WBGene00016609	1.14091
521	WBGene00008143	1.13951
522	WBGene00016346	1.1395
523	WBGene00006579	1.13887
524	WBGene00012107	1.13838
525	WBGene00018070	1.13837
526	WBGene00006555	1.13782
527	WBGene00010418	1.13702
528	WBGene00013552	1.1361
529	WBGene00021732	1.13577
530	WBGene00013604	1.13505
531	WBGene00010257	1.13502
532	WBGene00044891	1.13494
533	WBGene00013516	1.13444
534	WBGene00011752	1.13384
535	WBGene00016307	1.13381
536	WBGene00010621	1.13338
537	WBGene00007985	1.13265
538	WBGene00009939	1.13228
539	WBGene00010048	1.13099
540	WBGene00002047	1.13071
541	WBGene00044783	1.13067
542	WBGene00006996	1.13036
543	WBGene00017140	1.13006
544	WBGene00010815	1.12955
545	WBGene00012702	1.12927
546	WBGene00019786	1.12897
547	WBGene00012879	1.12858
548	WBGene00011324	1.1282
549	WBGene00044724	1.12766
550	WBGene00010606	1.12715
551	WBGene00015687	1.12662
552	WBGene00003918	1.12656
553	WBGene00003509	1.12644
554	WBGene00011201	1.12618
555	WBGene00004239	1.12542
556	WBGene00007414	1.12497
557	WBGene00012117	1.12497
558	WBGene00004243	1.12435
559	WBGene00020035	1.12399
560	WBGene00012163	1.12388
561	WBGene00010194	1.12383
562	WBGene00016501	1.1229
563	WBGene00000387	1.12226
564	WBGene00194713	1.1216
565	WBGene00020954	1.1212
566	WBGene00001937	1.12103
567	WBGene00009634	1.12071
568	WBGene00000163	1.12039
569	WBGene00019082	1.11998
570	WBGene00001332	1.11942
571	WBGene00010409	1.11904
572	WBGene00006720	1.11892
573	WBGene00015216	1.11837
574	WBGene00016923	1.11822
575	WBGene00002982	1.11811
576	WBGene00018137	1.11739
577	WBGene00018037	1.11689
578	WBGene00008147	1.11678
579	WBGene00006389	1.11593
580	WBGene00011056	1.11581
581	WBGene00020896	1.11546
582	WBGene00017886	1.11544
583	WBGene00003044	1.11409
584	WBGene00077531	1.11407
585	WBGene00014159	1.11401
586	WBGene00000423	1.11326
587	WBGene00001413	1.11225
588	WBGene00017660	1.11211
589	WBGene00003510	1.11205
590	WBGene00015747	1.11102
591	WBGene00011614	1.11079
592	WBGene00019600	1.11044
593	WBGene00009202	1.11032
594	WBGene00015312	1.10907
595	WBGene00012723	1.10852
596	WBGene00017452	1.10797
597	WBGene00004034	1.10729
598	WBGene00007332	1.1072
599	WBGene00018014	1.10708
600	WBGene00006732	1.10645
601	WBGene00012104	1.10608
602	WBGene00007196	1.10599
603	WBGene00003965	1.10538
604	WBGene00011490	1.10518
605	WBGene00007499	1.10478
606	WBGene00001835	1.10471
607	WBGene00013224	1.10447
608	WBGene00019677	1.10428
609	WBGene00015505	1.10427
610	WBGene00012144	1.10362
611	WBGene00017548	1.10279
612	WBGene00008105	1.10279
613	WBGene00017304	1.10249
614	WBGene00019651	1.10241
615	WBGene00009025	1.102
616	WBGene00011275	1.10186
617	WBGene00001981	1.10163
618	WBGene00000868	1.10117
619	WBGene00000405	1.09889
620	WBGene00021628	1.09769
621	WBGene00009277	1.09637
622	WBGene00020948	1.09607
623	WBGene00009977	1.09549
624	WBGene00010353	1.09516
625	WBGene00003479	1.09477
626	WBGene00011279	1.09441
627	WBGene00018997	1.09428
628	WBGene00006547	1.0937
629	WBGene00022775	1.09296
630	WBGene00013216	1.09285
631	WBGene00010242	1.09155
632	WBGene00002028	1.09108
633	WBGene00000496	1.09053
634	WBGene00002251	1.09053
635	WBGene00017365	1.09034
636	WBGene00020964	1.09033
637	WBGene00009262	1.09024
638	WBGene00010036	1.08986
639	WBGene00269433	1.08983
640	WBGene00008207	1.08962
641	WBGene00010493	1.08809
642	WBGene00008641	1.08802
643	WBGene00011560	1.08774
644	WBGene00020320	1.08749
645	WBGene00003161	1.08732
646	WBGene00020091	1.08654
647	WBGene00002180	1.08647
648	WBGene00020833	1.08646
649	WBGene00009341	1.08632
650	WBGene00017708	1.08615
651	WBGene00000189	1.08517
652	WBGene00194892	1.08515
653	WBGene00004163	1.08362
654	WBGene00020290	1.08351
655	WBGene00001980	1.08271
656	WBGene00009803	1.08243
657	WBGene00015171	1.08242
658	WBGene00016056	1.0823
659	WBGene00022043	1.08203
660	WBGene00010767	1.0818
661	WBGene00013381	1.08167
662	WBGene00022502	1.08113
663	WBGene00000478	1.08062
664	WBGene00000781	1.08059
665	WBGene00007551	1.08046
666	WBGene00014130	1.08038
667	WBGene00009404	1.08023
668	WBGene00000731	1.07969
669	WBGene00016263	1.0794
670	WBGene00007710	1.0782
671	WBGene00015083	1.0781
672	WBGene00006443	1.07768
673	WBGene00077525	1.07748
674	WBGene00018595	1.07681
675	WBGene00000120	1.07663
676	WBGene00016540	1.07663
677	WBGene00010093	1.07657
678	WBGene00009138	1.07604
679	WBGene00022037	1.07571
680	WBGene00015691	1.07498
681	WBGene00021376	1.07392
682	WBGene00008546	1.07374
683	WBGene00020774	1.07357
684	WBGene00001838	1.07237
685	WBGene00012672	1.07229
686	WBGene00011320	1.07199
687	WBGene00022586	1.07102
688	WBGene00019967	1.07068
689	WBGene00009188	1.07063
690	WBGene00021541	1.07047
691	WBGene00021463	1.07002
692	WBGene00020543	1.06937
693	WBGene00004905	1.06934
694	WBGene00012435	1.06927
695	WBGene00015971	1.06923
696	WBGene00015189	1.06882
697	WBGene00020466	1.06863
698	WBGene00011956	1.06862
699	WBGene00013719	1.0684
700	WBGene00044614	1.06818
701	WBGene00009174	1.06774
702	WBGene00009372	1.06641
703	WBGene00009930	1.06634
704	WBGene00006431	1.06554
705	WBGene00020472	1.06479
706	WBGene00235133	1.06473
707	WBGene00017583	1.06443
708	WBGene00009441	1.0644
709	WBGene00012551	1.06415
710	WBGene00011834	1.06306
711	WBGene00019514	1.06182
712	WBGene00009924	1.06177
713	WBGene00015598	1.0617
714	WBGene00022488	1.0615
715	WBGene00005021	1.0612
716	WBGene00004181	1.06092
717	WBGene00011739	1.0609
718	WBGene00018955	1.06066
719	WBGene00013724	1.06041
720	WBGene00019381	1.06027
721	WBGene00020823	1.05997
722	WBGene00012436	1.05869
723	WBGene00011741	1.05853
724	WBGene00000145	1.05851
725	WBGene00010678	1.05834
726	WBGene00013725	1.05783
727	WBGene00018483	1.05676
728	WBGene00003037	1.0567
729	WBGene00044338	1.05648
730	WBGene00004781	1.05636
731	WBGene00021056	1.05584
732	WBGene00021378	1.0554
733	WBGene00011994	1.05535
734	WBGene00013509	1.05515
735	WBGene00012900	1.05485
736	WBGene00184990	1.05474
737	WBGene00018678	1.05448
738	WBGene00003619	1.05443
739	WBGene00012014	1.05432
740	WBGene00003582	1.05419
741	WBGene00008729	1.05391
742	WBGene00001569	1.05371
743	WBGene00001044	1.05341
744	WBGene00013334	1.05332
745	WBGene00016671	1.05309
746	WBGene00006649	1.05303
747	WBGene00021344	1.05299
748	WBGene00004945	1.05238
749	WBGene00016353	1.05234
750	WBGene00007094	1.05233
751	WBGene00004819	1.05108
752	WBGene00012604	1.0507
753	WBGene00004371	1.05058
754	WBGene00044069	1.05056
755	WBGene00009648	1.05042
756	WBGene00011894	1.05029
757	WBGene00003012	1.05004
758	WBGene00013446	1.04967
759	WBGene00044773	1.04965
760	WBGene00004822	1.04954
761	WBGene00002129	1.04936
762	WBGene00011815	1.04901
763	WBGene00007760	1.04847
764	WBGene00206525	1.04841
765	WBGene00011997	1.04786
766	WBGene00013106	1.04776
767	WBGene00005025	1.04767
768	WBGene00015769	1.04763
769	WBGene00005007	1.04756
770	WBGene00003209	1.04733
771	WBGene00012157	1.04696
772	WBGene00018010	1.04681
773	WBGene00017142	1.04667
774	WBGene00009086	1.04666
775	WBGene00006974	1.04636
776	WBGene00001645	1.04619
777	WBGene00011814	1.04601
778	WBGene00012203	1.04587
779	WBGene00018605	1.04481
780	WBGene00019129	1.0446
781	WBGene00004339	1.04362
782	WBGene00011529	1.04336
783	WBGene00012101	1.04279
784	WBGene00001513	1.04224
785	WBGene00021247	1.04207
786	WBGene00015807	1.04199
787	WBGene00012175	1.04196
788	WBGene00007150	1.0414
789	WBGene00044340	1.04137
790	WBGene00012675	1.04123
791	WBGene00016546	1.03936
792	WBGene00013434	1.03914
793	WBGene00022074	1.03911
794	WBGene00012317	1.03875
795	WBGene00000147	1.03867
796	WBGene00022445	1.03855
797	WBGene00044251	1.03726
798	WBGene00012641	1.03723
799	WBGene00255714	1.03678
800	WBGene00003961	1.03665
801	WBGene00006498	1.03635
802	WBGene00219796	1.03631
803	WBGene00044737	1.03616
804	WBGene00017992	1.03557
805	WBGene00008138	1.03425
806	WBGene00006575	1.03402
807	WBGene00016877	1.03278
808	WBGene00019825	1.03218
809	WBGene00017397	1.03212
810	WBGene00017985	1.03211
811	WBGene00006546	1.03185
812	WBGene00017931	1.03156
813	WBGene00022092	1.03082
814	WBGene00016453	1.03046
815	WBGene00021519	1.03044
816	WBGene00003499	1.03033
817	WBGene00006940	1.02942
818	WBGene00006773	1.02934
819	WBGene00012492	1.02876
820	WBGene00006593	1.02871
821	WBGene00007110	1.02833
822	WBGene00012560	1.02787
823	WBGene00000866	1.02737
824	WBGene00010519	1.02727
825	WBGene00008822	1.02716
826	WBGene00022398	1.02676
827	WBGene00007168	1.02671
828	WBGene00009133	1.02643
829	WBGene00016564	1.02622
830	WBGene00019757	1.0258
831	WBGene00008389	1.02574
832	WBGene00008343	1.02563
833	WBGene00016421	1.02514
834	WBGene00021648	1.025
835	WBGene00002144	1.0245
836	WBGene00018149	1.02425
837	WBGene00011915	1.0232
838	WBGene00016045	1.02291
839	WBGene00006331	1.02274
840	WBGene00001977	1.02116
841	WBGene00016894	1.01965
842	WBGene00022620	1.01938
843	WBGene00006817	1.01906
844	WBGene00007730	1.01882
845	WBGene00009834	1.0187
846	WBGene00009343	1.01855
847	WBGene00013892	1.01813
848	WBGene00077453	1.01803
849	WBGene00014163	1.01762
850	WBGene00022440	1.0166
851	WBGene00044665	1.01605
852	WBGene00007216	1.01562
853	WBGene00021726	1.01555
854	WBGene00021855	1.01428
855	WBGene00000444	1.01428
856	WBGene00021640	1.0142
857	WBGene00004352	1.01419
858	WBGene00020094	1.01395
859	WBGene00010981	1.0128
860	WBGene00001582	1.0127
861	WBGene00001440	1.0123
862	WBGene00001051	1.012
863	WBGene00021561	1.01169
864	WBGene00014118	1.0115
865	WBGene00009556	1.01139
866	WBGene00010552	1.01061
867	WBGene00195239	1.0106
868	WBGene00019918	1.00953
869	WBGene00017828	1.0087
870	WBGene00017742	1.00762
871	WBGene00003246	1.00624
872	WBGene00020741	1.00619
873	WBGene00010229	1.00615
874	WBGene00021503	1.00613
875	WBGene00019989	1.0061
876	WBGene00003222	1.00426
877	WBGene00007788	1.00416
878	WBGene00002985	1.00352
879	WBGene00006483	1.00342
880	WBGene00001910	1.00341
881	WBGene00019465	1.00332
882	WBGene00000417	1.00311
883	WBGene00016573	1.00264
884	WBGene00008210	1.00262
885	WBGene00006808	1.00258
886	WBGene00003602	1.00254
887	WBGene00020456	1.00235
888	WBGene00012982	1.0018
889	WBGene00045291	1.00173
890	WBGene00013122	1.00159
891	WBGene00012220	1.00135
892	WBGene00017827	1.00108
893	WBGene00014027	1.00104
894	WBGene00006386	1.0008
895	WBGene00003035	1.00072
896	WBGene00010913	1.00071
897	WBGene00012527	0.999826
898	WBGene00017852	0.999317
899	WBGene00018259	0.999014
900	WBGene00018321	0.998957
901	WBGene00000416	0.998172
902	WBGene00008844	0.998026
903	WBGene00010440	0.996953
904	WBGene00021750	0.996276
905	WBGene00003014	0.995904
906	WBGene00022113	0.994586
907	WBGene00020830	0.994131
908	WBGene00013419	0.9935
909	WBGene00017538	0.992778
910	WBGene00006977	0.992326
911	WBGene00235164	0.991503
912	WBGene00009173	0.991221
913	WBGene00013998	0.991046
914	WBGene00009820	0.990844
915	WBGene00010664	0.990109
916	WBGene00077500	0.9899
917	WBGene00009940	0.989804
918	WBGene00018974	0.989558
919	WBGene00013847	0.989403
920	WBGene00022830	0.989334
921	WBGene00003241	0.989227
922	WBGene00019628	0.988956
923	WBGene00010770	0.988936
924	WBGene00003236	0.988844
925	WBGene00003979	0.988539
926	WBGene00018011	0.988532
927	WBGene00016591	0.987024
928	WBGene00019697	0.9865
929	WBGene00005019	0.986346
930	WBGene00013223	0.986212
931	WBGene00012142	0.986094
932	WBGene00010426	0.985916
933	WBGene00019704	0.985662
934	WBGene00006795	0.985448
935	WBGene00016576	0.985137
936	WBGene00012920	0.984749
937	WBGene00001855	0.984511
938	WBGene00002072	0.984446
939	WBGene00007144	0.984444
940	WBGene00010492	0.983842
941	WBGene00007024	0.983354
942	WBGene00006349	0.983313
943	WBGene00021246	0.982826
944	WBGene00000995	0.982816
945	WBGene00018302	0.9821
946	WBGene00007573	0.98196
947	WBGene00219288	0.981779
948	WBGene00011054	0.981756
949	WBGene00012718	0.98163
950	WBGene00270322	0.981274
951	WBGene00009588	0.981199
952	WBGene00009272	0.980853
953	WBGene00020588	0.980679
954	WBGene00009976	0.980425
955	WBGene00012156	0.980201
956	WBGene00003864	0.980177
957	WBGene00000247	0.979826
958	WBGene00019938	0.979744
959	WBGene00003767	0.979418
960	WBGene00018817	0.979323
961	WBGene00001036	0.979305
962	WBGene00001482	0.979101
963	WBGene00021465	0.978513
964	WBGene00008323	0.97841
965	WBGene00013726	0.978123
966	WBGene00008165	0.977966
967	WBGene00016592	0.977895
968	WBGene00015978	0.977681
969	WBGene00002241	0.977607
970	WBGene00015746	0.977329
971	WBGene00012299	0.976826
972	WBGene00010555	0.976743
973	WBGene00010889	0.97672
974	WBGene00018510	0.976314
975	WBGene00007013	0.976127
976	WBGene00021841	0.975349
977	WBGene00011687	0.975177
978	WBGene00016639	0.975124
979	WBGene00020625	0.974611
980	WBGene00011871	0.974368
981	WBGene00013632	0.973765
982	WBGene00016157	0.972922
983	WBGene00010840	0.972911
984	WBGene00017072	0.972599
985	WBGene00010828	0.971799
986	WBGene00003394	0.971708
987	WBGene00001309	0.971512
988	WBGene00016987	0.971258
989	WBGene00011532	0.971028
990	WBGene00011959	0.970983
991	WBGene00086566	0.970405
992	WBGene00022035	0.970383
993	WBGene00007102	0.970129
994	WBGene00017818	0.969405
995	WBGene00021552	0.969175
996	WBGene00014871	0.968987
997	WBGene00022835	0.968247
998	WBGene00012512	0.968206
999	WBGene00008710	0.968049
1000	WBGene00007023	0.96774
1001	WBGene00013220	0.967723
1002	WBGene00011962	0.967522
1003	WBGene00019006	0.967516
1004	WBGene00012910	0.967483
1005	WBGene00022772	0.967161
1006	WBGene00011276	0.966899
1007	WBGene00007286	0.966821
1008	WBGene00004340	0.966754
1009	WBGene00004322	0.966568
1010	WBGene00001946	0.966398
1011	WBGene00021522	0.965947
1012	WBGene00008035	0.965673
1013	WBGene00008410	0.965362
1014	WBGene00010971	0.96526
1015	WBGene00009163	0.965258
1016	WBGene00004279	0.965244
1017	WBGene00006963	0.964681
1018	WBGene00021882	0.964297
1019	WBGene00016848	0.96427
1020	WBGene00015249	0.964148
1021	WBGene00002112	0.963988
1022	WBGene00006391	0.963701
1023	WBGene00004032	0.963583
1024	WBGene00023418	0.963545
1025	WBGene00003656	0.963477
1026	WBGene00021339	0.963443
1027	WBGene00017267	0.963366
1028	WBGene00017088	0.963142
1029	WBGene00003155	0.962969
1030	WBGene00021155	0.96279
1031	WBGene00006538	0.962069
1032	WBGene00017265	0.962026
1033	WBGene00003086	0.961882
1034	WBGene00019723	0.961832
1035	WBGene00017461	0.961799
1036	WBGene00003576	0.961263
1037	WBGene00008331	0.960979
1038	WBGene00017270	0.960955
1039	WBGene00004136	0.960819
1040	WBGene00011887	0.960758
1041	WBGene00003234	0.960202
1042	WBGene00013689	0.960157
1043	WBGene00013126	0.960135
1044	WBGene00006448	0.96012
1045	WBGene00013353	0.959512
1046	WBGene00013553	0.959016
1047	WBGene00013699	0.958244
1048	WBGene00001597	0.958047
1049	WBGene00019354	0.958006
1050	WBGene00011977	0.957959
1051	WBGene00021391	0.957573
1052	WBGene00004338	0.957394
1053	WBGene00021000	0.957145
1054	WBGene00001092	0.956718
1055	WBGene00019535	0.956506
1056	WBGene00021460	0.956127
1057	WBGene00017165	0.956037
1058	WBGene00009505	0.955757
1059	WBGene00001743	0.955342
1060	WBGene00016318	0.95473
1061	WBGene00004374	0.953958
1062	WBGene00002275	0.953875
1063	WBGene00007846	0.953723
1064	WBGene00003478	0.953585
1065	WBGene00045407	0.953209
1066	WBGene00017002	0.952648
1067	WBGene00016443	0.952574
1068	WBGene00020375	0.952448
1069	WBGene00235102	0.951858
1070	WBGene00008561	0.951634
1071	WBGene00003229	0.951597
1072	WBGene00003216	0.951147
1073	WBGene00000540	0.951101
1074	WBGene00020843	0.950633
1075	WBGene00017385	0.950174
1076	WBGene00016148	0.949964
1077	WBGene00010037	0.949682
1078	WBGene00018957	0.949562
1079	WBGene00009385	0.949162
1080	WBGene00009461	0.949116
1081	WBGene00020628	0.949065
1082	WBGene00008178	0.948843
1083	WBGene00021458	0.947963
1084	WBGene00003396	0.947935
1085	WBGene00020447	0.947918
1086	WBGene00019218	0.947716
1087	WBGene00001583	0.947635
1088	WBGene00003406	0.94756
1089	WBGene00009089	0.947471
1090	WBGene00001574	0.947279
1091	WBGene00011746	0.947228
1092	WBGene00045434	0.947053
1093	WBGene00007707	0.946123
1094	WBGene00007694	0.945941
1095	WBGene00044423	0.94561
1096	WBGene00000289	0.945477
1097	WBGene00016725	0.945199
1098	WBGene00008052	0.945156
1099	WBGene00003405	0.945051
1100	WBGene00009736	0.944992
1101	WBGene00004319	0.944926
1102	WBGene00016602	0.944908
1103	WBGene00004333	0.944856
1104	WBGene00008747	0.944841
1105	WBGene00015251	0.944414
1106	WBGene00003142	0.944129
1107	WBGene00003504	0.943978
1108	WBGene00044201	0.943901
1109	WBGene00003158	0.943691
1110	WBGene00001653	0.943535
1111	WBGene00012700	0.94312
1112	WBGene00001102	0.942975
1113	WBGene00006902	0.942879
1114	WBGene00013259	0.942209
1115	WBGene00013593	0.942136
1116	WBGene00017774	0.942057
1117	WBGene00022532	0.941701
1118	WBGene00021827	0.941425
1119	WBGene00022251	0.941368
1120	WBGene00012221	0.941285
1121	WBGene00003150	0.94128
1122	WBGene00019662	0.941258
1123	WBGene00018598	0.941081
1124	WBGene00022257	0.940902
1125	WBGene00008140	0.940855
1126	WBGene00019244	0.940712
1127	WBGene00003230	0.940509
1128	WBGene00000220	0.940312
1129	WBGene00014018	0.9403
1130	WBGene00017696	0.940203
1131	WBGene00003804	0.940018
1132	WBGene00018230	0.939915
1133	WBGene00001974	0.9399
1134	WBGene00001609	0.93962
1135	WBGene00006975	0.939483
1136	WBGene00003912	0.938459
1137	WBGene00013567	0.93813
1138	WBGene00015162	0.937989
1139	WBGene00021153	0.93775
1140	WBGene00020027	0.937675
1141	WBGene00001683	0.937457
1142	WBGene00018511	0.93717
1143	WBGene00019842	0.937138
1144	WBGene00002020	0.936846
1145	WBGene00016218	0.936509
1146	WBGene00012352	0.93646
1147	WBGene00009118	0.936137
1148	WBGene00002019	0.936062
1149	WBGene00018585	0.936009
1150	WBGene00021626	0.935774
1151	WBGene00009346	0.935141
1152	WBGene00010354	0.934991
1153	WBGene00022193	0.934879
1154	WBGene00019687	0.934382
1155	WBGene00001050	0.934258
1156	WBGene00011611	0.934195
1157	WBGene00000408	0.933949
1158	WBGene00011145	0.933711
1159	WBGene00022399	0.933583
1160	WBGene00014017	0.933577
1161	WBGene00018016	0.933518
1162	WBGene00021693	0.932853
1163	WBGene00012241	0.932565
1164	WBGene00001842	0.932402
1165	WBGene00021725	0.932242
1166	WBGene00018665	0.932099
1167	WBGene00044337	0.931767
1168	WBGene00022278	0.93139
1169	WBGene00015188	0.931219
1170	WBGene00011683	0.93098
1171	WBGene00016971	0.930971
1172	WBGene00009364	0.930955
1173	WBGene00018438	0.930792
1174	WBGene00011011	0.930771
1175	WBGene00018946	0.930766
1176	WBGene00194926	0.930652
1177	WBGene00010951	0.930414
1178	WBGene00011940	0.93034
1179	WBGene00006402	0.930323
1180	WBGene00006477	0.930072
1181	WBGene00022141	0.929886
1182	WBGene00006384	0.929763
1183	WBGene00000898	0.929736
1184	WBGene00007015	0.929132
1185	WBGene00007171	0.929112
1186	WBGene00020881	0.928766
1187	WBGene00004180	0.928533
1188	WBGene00020721	0.928301
1189	WBGene00000498	0.928201
1190	WBGene00015776	0.928086
1191	WBGene00021945	0.928054
1192	WBGene00001998	0.927951
1193	WBGene00020425	0.927938
1194	WBGene00003960	0.927345
1195	WBGene00016792	0.927262
1196	WBGene00003778	0.927049
1197	WBGene00012029	0.926899
1198	WBGene00021912	0.926678
1199	WBGene00022817	0.925785
1200	WBGene00017766	0.925578
1201	WBGene00015939	0.925384
1202	WBGene00021689	0.925355
1203	WBGene00000520	0.925144
1204	WBGene00002106	0.924939
1205	WBGene00017733	0.924475
1206	WBGene00022788	0.923809
1207	WBGene00017293	0.923453
1208	WBGene00000867	0.923278
1209	WBGene00007278	0.922778
1210	WBGene00010551	0.922636
1211	WBGene00006542	0.922609
1212	WBGene00017247	0.922582
1213	WBGene00011774	0.922133
1214	WBGene00015494	0.921903
1215	WBGene00011237	0.921643
1216	WBGene00010539	0.921382
1217	WBGene00019824	0.921314
1218	WBGene00008780	0.921011
1219	WBGene00022376	0.920866
1220	WBGene00007621	0.920499
1221	WBGene00008538	0.920222
1222	WBGene00007458	0.920213
1223	WBGene00013359	0.920118
1224	WBGene00018566	0.919958
1225	WBGene00022836	0.919803
1226	WBGene00004050	0.918622
1227	WBGene00001161	0.918496
1228	WBGene00013569	0.918316
1229	WBGene00011299	0.918181
1230	WBGene00008296	0.918006
1231	WBGene00007476	0.91772
1232	WBGene00206362	0.917556
1233	WBGene00019167	0.917395
1234	WBGene00013323	0.917257
1235	WBGene00007771	0.916994
1236	WBGene00022167	0.916911
1237	WBGene00001933	0.916359
1238	WBGene00022099	0.916007
1239	WBGene00000168	0.9158
1240	WBGene00015150	0.915342
1241	WBGene00021282	0.915161
1242	WBGene00015468	0.915048
1243	WBGene00044689	0.915002
1244	WBGene00002226	0.914867
1245	WBGene00010142	0.914715
1246	WBGene00012868	0.914497
1247	WBGene00008847	0.914438
1248	WBGene00009365	0.914355
1249	WBGene00015167	0.914292
1250	WBGene00012167	0.914251
1251	WBGene00009366	0.913549
1252	WBGene00011325	0.912915
1253	WBGene00021359	0.912914
1254	WBGene00022300	0.91275
1255	WBGene00017352	0.912438
1256	WBGene00008218	0.912407
1257	WBGene00019396	0.912285
1258	WBGene00006063	0.912247
1259	WBGene00022697	0.912069
1260	WBGene00007705	0.911971
1261	WBGene00050917	0.911904
1262	WBGene00016378	0.911671
1263	WBGene00012319	0.911458
1264	WBGene00013742	0.910992
1265	WBGene00003157	0.910319
1266	WBGene00008008	0.910069
1267	WBGene00008918	0.909937
1268	WBGene00013026	0.909895
1269	WBGene00022190	0.909742
1270	WBGene00017951	0.90928
1271	WBGene00001059	0.909059
1272	WBGene00001412	0.908736
1273	WBGene00012240	0.908501
1274	WBGene00018867	0.908358
1275	WBGene00044357	0.907918
1276	WBGene00000420	0.907884
1277	WBGene00011318	0.907563
1278	WBGene00013698	0.907299
1279	WBGene00003955	0.907144
1280	WBGene00003043	0.907
1281	WBGene00012261	0.906606
1282	WBGene00018446	0.906506
1283	WBGene00000099	0.906031
1284	WBGene00021467	0.90593
1285	WBGene00020208	0.905865
1286	WBGene00018009	0.905566
1287	WBGene00002034	0.905561
1288	WBGene00012931	0.905086
1289	WBGene00011916	0.904596
1290	WBGene00003601	0.904509
1291	WBGene00001499	0.90446
1292	WBGene00009286	0.904349
1293	WBGene00013128	0.903356
1294	WBGene00020910	0.903098
1295	WBGene00000411	0.902814
1296	WBGene00017967	0.902213
1297	WBGene00019217	0.901671
1298	WBGene00010159	0.901175
1299	WBGene00020096	0.900981
1300	WBGene00011706	0.900871
1301	WBGene00000670	0.90052
1302	WBGene00013239	0.900197
1303	WBGene00014177	0.900144
1304	WBGene00022466	0.899507
1305	WBGene00017402	0.899333
1306	WBGene00007020	0.899296
1307	WBGene00021470	0.899261
1308	WBGene00004737	0.899047
1309	WBGene00017083	0.898907
1310	WBGene00011636	0.898323
1311	WBGene00164985	0.898154
1312	WBGene00007434	0.898124
1313	WBGene00015697	0.89807
1314	WBGene00018908	0.897378
1315	WBGene00008531	0.897242
1316	WBGene00017355	0.896987
1317	WBGene00018964	0.896765
1318	WBGene00009661	0.896738
1319	WBGene00001046	0.896625
1320	WBGene00020219	0.896394
1321	WBGene00009996	0.895973
1322	WBGene00016674	0.895862
1323	WBGene00019576	0.895734
1324	WBGene00043056	0.895413
1325	WBGene00001985	0.895133
1326	WBGene00013901	0.895116
1327	WBGene00019087	0.894973
1328	WBGene00077732	0.894565
1329	WBGene00010685	0.894483
1330	WBGene00022891	0.89447
1331	WBGene00017450	0.894263
1332	WBGene00013261	0.89363
1333	WBGene00002228	0.893579
1334	WBGene00011250	0.893398
1335	WBGene00021542	0.893078
1336	WBGene00015161	0.892849
1337	WBGene00194861	0.892403
1338	WBGene00011925	0.892209
1339	WBGene00009946	0.892115
1340	WBGene00004028	0.891826
1341	WBGene00013433	0.891782
1342	WBGene00007109	0.891357
1343	WBGene00001016	0.891345
1344	WBGene00015513	0.890897
1345	WBGene00022821	0.890681
1346	WBGene00018777	0.890565
1347	WBGene00011225	0.890072
1348	WBGene00004804	0.889796
1349	WBGene00044694	0.889719
1350	WBGene00000985	0.889674
1351	WBGene00019143	0.889672
1352	WBGene00019077	0.889646
1353	WBGene00018150	0.889534
1354	WBGene00018330	0.888651
1355	WBGene00018632	0.888512
1356	WBGene00006387	0.888342
1357	WBGene00007911	0.888333
1358	WBGene00012188	0.887874
1359	WBGene00013857	0.887847
1360	WBGene00004147	0.887537
1361	WBGene00002219	0.887301
1362	WBGene00022629	0.886676
1363	WBGene00004049	0.886317
1364	WBGene00007277	0.886237
1365	WBGene00016608	0.886147
1366	WBGene00001836	0.885339
1367	WBGene00011976	0.884964
1368	WBGene00000413	0.884845
1369	WBGene00077658	0.884843
1370	WBGene00002192	0.884215
1371	WBGene00017316	0.883668
1372	WBGene00006770	0.883463
1373	WBGene00045406	0.883115
1374	WBGene00000146	0.883076
1375	WBGene00008000	0.883023
1376	WBGene00007513	0.882849
1377	WBGene00010066	0.882388
1378	WBGene00010351	0.882355
1379	WBGene00020820	0.882338
1380	WBGene00020553	0.882179
1381	WBGene00022667	0.88196
1382	WBGene00015146	0.881891
1383	WBGene00017003	0.881799
1384	WBGene00009120	0.881778
1385	WBGene00016373	0.881739
1386	WBGene00017460	0.88156
1387	WBGene00001049	0.881525
1388	WBGene00017589	0.881524
1389	WBGene00012164	0.881514
1390	WBGene00011431	0.88131
1391	WBGene00012806	0.880375
1392	WBGene00206389	0.880162
1393	WBGene00019127	0.879971
1394	WBGene00021539	0.879827
1395	WBGene00007019	0.879419
1396	WBGene00003026	0.879297
1397	WBGene00004350	0.879089
1398	WBGene00001514	0.878918
1399	WBGene00044520	0.878405
1400	WBGene00235325	0.87831
1401	WBGene00018427	0.878308
1402	WBGene00010839	0.878039
1403	WBGene00013508	0.8779
1404	WBGene00007012	0.877464
1405	WBGene00004308	0.877306
1406	WBGene00000935	0.87729
1407	WBGene00010726	0.876822
1408	WBGene00018806	0.876753
1409	WBGene00017053	0.87646
1410	WBGene00006368	0.876363
1411	WBGene00000863	0.876351
1412	WBGene00011731	0.876274
1413	WBGene00020481	0.876122
1414	WBGene00014230	0.875993
1415	WBGene00019402	0.875955
1416	WBGene00009427	0.875704
1417	WBGene00017837	0.875612
1418	WBGene00016966	0.875586
1419	WBGene00011860	0.875188
1420	WBGene00015392	0.875088
1421	WBGene00015781	0.873891
1422	WBGene00013610	0.873815
1423	WBGene00019771	0.873611
1424	WBGene00009448	0.873519
1425	WBGene00022014	0.873283
1426	WBGene00012673	0.872401
1427	WBGene00003144	0.872385
1428	WBGene00009594	0.872099
1429	WBGene00000202	0.872083
1430	WBGene00007146	0.871961
1431	WBGene00185089	0.871731
1432	WBGene00013015	0.871116
1433	WBGene00022646	0.871101
1434	WBGene00016291	0.870986
1435	WBGene00015073	0.870899
1436	WBGene00013687	0.870631
1437	WBGene00022292	0.870324
1438	WBGene00014166	0.869879
1439	WBGene00019833	0.869865
1440	WBGene00000886	0.869486
1441	WBGene00010759	0.869221
1442	WBGene00006324	0.869187
1443	WBGene00018828	0.868992
1444	WBGene00002068	0.868626
1445	WBGene00011528	0.868434
1446	WBGene00017064	0.868282
1447	WBGene00010198	0.868264
1448	WBGene00016567	0.868194
1449	WBGene00000797	0.867897
1450	WBGene00010975	0.867396
1451	WBGene00012867	0.86735
1452	WBGene00019503	0.867269
1453	WBGene00013436	0.867172
1454	WBGene00017801	0.866489
1455	WBGene00003164	0.866147
1456	WBGene00011274	0.866146
1457	WBGene00020322	0.8654
1458	WBGene00007226	0.8653
1459	WBGene00011737	0.864965
1460	WBGene00021239	0.864832
1461	WBGene00013383	0.864606
1462	WBGene00011914	0.86406
1463	WBGene00016912	0.86398
1464	WBGene00003196	0.863877
1465	WBGene00019197	0.863254
1466	WBGene00011312	0.863114
1467	WBGene00021853	0.863012
1468	WBGene00004095	0.862858
1469	WBGene00017482	0.862099
1470	WBGene00008921	0.861931
1471	WBGene00007640	0.861839
1472	WBGene00018249	0.861499
1473	WBGene00022590	0.861329
1474	WBGene00017699	0.861114
1475	WBGene00018923	0.860921
1476	WBGene00011103	0.860451
1477	WBGene00012835	0.860442
1478	WBGene00003010	0.860339
1479	WBGene00015470	0.860305
1480	WBGene00007797	0.860049
1481	WBGene00008722	0.86001
1482	WBGene00007622	0.859745
1483	WBGene00001194	0.859713
1484	WBGene00018959	0.859379
1485	WBGene00010141	0.859341
1486	WBGene00012972	0.859331
1487	WBGene00007579	0.859046
1488	WBGene00011502	0.859004
1489	WBGene00012903	0.858998
1490	WBGene00019415	0.858884
1491	WBGene00013881	0.858882
1492	WBGene00008288	0.85888
1493	WBGene00000469	0.858858
1494	WBGene00021601	0.858757
1495	WBGene00044690	0.85851
1496	WBGene00007029	0.858503
1497	WBGene00012651	0.858207
1498	WBGene00015023	0.857804
1499	WBGene00021736	0.857742
1500	WBGene00011872	0.857635
1501	WBGene00001022	0.857251
1502	WBGene00008358	0.857141
1503	WBGene00006943	0.856288
1504	WBGene00019956	0.856179
1505	WBGene00015194	0.855834
1506	WBGene00009061	0.855771
1507	WBGene00002992	0.855612
1508	WBGene00000376	0.855315
1509	WBGene00044245	0.854902
1510	WBGene00018743	0.85461
1511	WBGene00009499	0.854373
1512	WBGene00001061	0.854361
1513	WBGene00001170	0.854278
1514	WBGene00021766	0.853626
1515	WBGene00009957	0.853597
1516	WBGene00017328	0.853519
1517	WBGene00017895	0.853504
1518	WBGene00000462	0.853496
1519	WBGene00008330	0.853042
1520	WBGene00005000	0.852573
1521	WBGene00018423	0.85212
1522	WBGene00004244	0.85156
1523	WBGene00003021	0.851519
1524	WBGene00013160	0.851292
1525	WBGene00016741	0.851145
1526	WBGene00015147	0.850942
1527	WBGene00016163	0.85077
1528	WBGene00000001	0.85064
1529	WBGene00007256	0.85056
1530	WBGene00015466	0.850509
1531	WBGene00008766	0.850405
1532	WBGene00009064	0.8496
1533	WBGene00007403	0.849358
1534	WBGene00013757	0.848918
1535	WBGene00007580	0.848768
1536	WBGene00013196	0.848587
1537	WBGene00004199	0.848583
1538	WBGene00011597	0.848463
1539	WBGene00019830	0.848156
1540	WBGene00015518	0.847787
1541	WBGene00022791	0.847679
1542	WBGene00044414	0.84743
1543	WBGene00004953	0.847407
1544	WBGene00018830	0.847334
1545	WBGene00011742	0.847171
1546	WBGene00009007	0.847054
1547	WBGene00019035	0.846865
1548	WBGene00019987	0.846849
1549	WBGene00009011	0.846841
1550	WBGene00019922	0.846786
1551	WBGene00003919	0.846601
1552	WBGene00023477	0.846419
1553	WBGene00001898	0.846381
1554	WBGene00002996	0.845892
1555	WBGene00004384	0.845496
1556	WBGene00003220	0.845176
1557	WBGene00021906	0.845138
1558	WBGene00018041	0.845031
1559	WBGene00000186	0.844859
1560	WBGene00020783	0.844454
1561	WBGene00004372	0.844429
1562	WBGene00012432	0.844309
1563	WBGene00022557	0.844153
1564	WBGene00004326	0.84371
1565	WBGene00008968	0.843565
1566	WBGene00016321	0.843303
1567	WBGene00001930	0.843189
1568	WBGene00044916	0.843014
1569	WBGene00011969	0.842905
1570	WBGene00004762	0.842505
1571	WBGene00016964	0.842494
1572	WBGene00008959	0.842375
1573	WBGene00013132	0.842335
1574	WBGene00019070	0.84228
1575	WBGene00016796	0.842149
1576	WBGene00021785	0.84204
1577	WBGene00007827	0.841602
1578	WBGene00004204	0.841576
1579	WBGene00016627	0.841547
1580	WBGene00013558	0.841491
1581	WBGene00006763	0.841381
1582	WBGene00010248	0.841367
1583	WBGene00021535	0.841048
1584	WBGene00235094	0.840205
1585	WBGene00015638	0.840159
1586	WBGene00000415	0.840097
1587	WBGene00006736	0.840065
1588	WBGene00004046	0.840004
1589	WBGene00013350	0.839659
1590	WBGene00000500	0.839486
1591	WBGene00016803	0.839459
1592	WBGene00004400	0.839336
1593	WBGene00009103	0.839335
1594	WBGene00011500	0.839335
1595	WBGene00011087	0.839144
1596	WBGene00000894	0.838483
1597	WBGene00003868	0.838259
1598	WBGene00010537	0.83821
1599	WBGene00006816	0.837867
1600	WBGene00018740	0.837811
1601	WBGene00007187	0.837722
1602	WBGene00044329	0.837233
1603	WBGene00017606	0.837227
1604	WBGene00000382	0.837074
1605	WBGene00013014	0.837034
1606	WBGene00004738	0.836887
1607	WBGene00011835	0.836865
1608	WBGene00013095	0.836461
1609	WBGene00018140	0.836227
1610	WBGene00010910	0.83588
1611	WBGene00010002	0.835387
1612	WBGene00022244	0.834619
1613	WBGene00017832	0.834497
1614	WBGene00006466	0.834494
1615	WBGene00003022	0.834442
1616	WBGene00013697	0.834064
1617	WBGene00004680	0.833879
1618	WBGene00012565	0.833858
1619	WBGene00021515	0.833801
1620	WBGene00015677	0.83336
1621	WBGene00017269	0.832912
1622	WBGene00004109	0.832531
1623	WBGene00012243	0.832373
1624	WBGene00004312	0.832201
1625	WBGene00008034	0.832047
1626	WBGene00004892	0.831835
1627	WBGene00021200	0.831718
1628	WBGene00019221	0.831229
1629	WBGene00021012	0.831152
1630	WBGene00007497	0.831014
1631	WBGene00016112	0.830939
1632	WBGene00012356	0.830784
1633	WBGene00009132	0.830783
1634	WBGene00020725	0.83078
1635	WBGene00018902	0.830639
1636	WBGene00010615	0.830604
1637	WBGene00010875	0.83037
1638	WBGene00002717	0.830131
1639	WBGene00044137	0.830039
1640	WBGene00021741	0.829793
1641	WBGene00013403	0.829787
1642	WBGene00016992	0.829731
1643	WBGene00012398	0.829609
1644	WBGene00022598	0.829393
1645	WBGene00022749	0.829267
1646	WBGene00021346	0.829151
1647	WBGene00012472	0.829119
1648	WBGene00001562	0.82904
1649	WBGene00006474	0.828951
1650	WBGene00002324	0.828869
1651	WBGene00016323	0.828812
1652	WBGene00017643	0.828399
1653	WBGene00009994	0.828373
1654	WBGene00009035	0.82823
1655	WBGene00019782	0.828059
1656	WBGene00002036	0.828017
1657	WBGene00015132	0.827993
1658	WBGene00017005	0.827858
1659	WBGene00007221	0.827622
1660	WBGene00019403	0.82755
1661	WBGene00006066	0.827402
1662	WBGene00008111	0.827345
1663	WBGene00015819	0.827328
1664	WBGene00000592	0.827208
1665	WBGene00020779	0.827125
1666	WBGene00010363	0.827111
1667	WBGene00004360	0.827084
1668	WBGene00001920	0.827078
1669	WBGene00011664	0.827037
1670	WBGene00016331	0.82693
1671	WBGene00011067	0.826771
1672	WBGene00009223	0.826702
1673	WBGene00003410	0.826567
1674	WBGene00018954	0.826131
1675	WBGene00009426	0.826073
1676	WBGene00015205	0.825655
1677	WBGene00009638	0.825171
1678	WBGene00005023	0.82501
1679	WBGene00011066	0.824594
1680	WBGene00010641	0.824497
1681	WBGene00012389	0.824363
1682	WBGene00021846	0.824126
1683	WBGene00004891	0.824052
1684	WBGene00003830	0.823953
1685	WBGene00015744	0.82377
1686	WBGene00001864	0.823758
1687	WBGene00016678	0.822989
1688	WBGene00002225	0.822788
1689	WBGene00011012	0.822777
1690	WBGene00045246	0.822516
1691	WBGene00020093	0.822331
1692	WBGene00004701	0.822031
1693	WBGene00016394	0.821963
1694	WBGene00019888	0.821552
1695	WBGene00011038	0.821391
1696	WBGene00009264	0.821372
1697	WBGene00007606	0.821287
1698	WBGene00015462	0.82048
1699	WBGene00008684	0.82005
1700	WBGene00012128	0.820039
1701	WBGene00013091	0.819793
1702	WBGene00012732	0.819702
1703	WBGene00011831	0.819667
1704	WBGene00007105	0.819497
1705	WBGene00001979	0.818982
1706	WBGene00004297	0.818509
1707	WBGene00044204	0.818345
1708	WBGene00007022	0.818154
1709	WBGene00020482	0.817798
1710	WBGene00003612	0.81747
1711	WBGene00017044	0.817458
1712	WBGene00012994	0.817389
1713	WBGene00001719	0.817158
1714	WBGene00019163	0.816853
1715	WBGene00000875	0.816495
1716	WBGene00001854	0.815908
1717	WBGene00002031	0.815823
1718	WBGene00017132	0.815615
1719	WBGene00013150	0.815332
1720	WBGene00018609	0.815131
1721	WBGene00008739	0.814973
1722	WBGene00018015	0.814571
1723	WBGene00000208	0.814011
1724	WBGene00014125	0.813895
1725	WBGene00003397	0.813709
1726	WBGene00000557	0.813548
1727	WBGene00022124	0.813507
1728	WBGene00007433	0.813272
1729	WBGene00003156	0.813057
1730	WBGene00006958	0.812712
1731	WBGene00020858	0.812624
1732	WBGene00001477	0.812601
1733	WBGene00011939	0.812437
1734	WBGene00010724	0.812069
1735	WBGene00013720	0.811428
1736	WBGene00018238	0.810921
1737	WBGene00000519	0.810787
1738	WBGene00045237	0.809974
1739	WBGene00021051	0.809936
1740	WBGene00015237	0.809728
1741	WBGene00019254	0.809713
1742	WBGene00020392	0.809705
1743	WBGene00007400	0.809703
1744	WBGene00015843	0.809273
1745	WBGene00010768	0.80894
1746	WBGene00004175	0.808825
1747	WBGene00015156	0.808728
1748	WBGene00014124	0.808693
1749	WBGene00011600	0.807966
1750	WBGene00010232	0.807929
1751	WBGene00021002	0.807777
1752	WBGene00009176	0.807378
1753	WBGene00022831	0.806986
1754	WBGene00020558	0.806791
1755	WBGene00011068	0.806424
1756	WBGene00000803	0.806295
1757	WBGene00003411	0.806261
1758	WBGene00002090	0.806227
1759	WBGene00000386	0.805275
1760	WBGene00016632	0.805256
1761	WBGene00022310	0.805097
1762	WBGene00020696	0.804946
1763	WBGene00003159	0.804859
1764	WBGene00011352	0.80476
1765	WBGene00007026	0.804738
1766	WBGene00011559	0.804599
1767	WBGene00009776	0.804137
1768	WBGene00016944	0.804108
1769	WBGene00011111	0.804061
1770	WBGene00000480	0.803896
1771	WBGene00003805	0.803534
1772	WBGene00012646	0.803477
1773	WBGene00012365	0.803335
1774	WBGene00004946	0.803309
1775	WBGene00007847	0.803287
1776	WBGene00008085	0.803151
1777	WBGene00002073	0.803075
1778	WBGene00015554	0.802971
1779	WBGene00000010	0.802788
1780	WBGene00044479	0.802502
1781	WBGene00007514	0.802423
1782	WBGene00022750	0.80235
1783	WBGene00000269	0.802305
1784	WBGene00013219	0.802292
1785	WBGene00016311	0.802262
1786	WBGene00044324	0.802241
1787	WBGene00013405	0.802151
1788	WBGene00004952	0.801912
1789	WBGene00016087	0.801787
1790	WBGene00000804	0.801656
1791	WBGene00019138	0.801411
1792	WBGene00022603	0.801338
1793	WBGene00018290	0.801108
1794	WBGene00016990	0.800473
1795	WBGene00018072	0.80046
1796	WBGene00018814	0.800417
1797	WBGene00006802	0.800357
1798	WBGene00019427	0.800151
1799	WBGene00009159	0.80007
1800	WBGene00012209	0.800057
1801	WBGene00007624	0.800043
1802	WBGene00010244	0.799701
1803	WBGene00011411	0.799675
1804	WBGene00019808	0.799582
1805	WBGene00013041	0.799474
1806	WBGene00044762	0.79942
1807	WBGene00007992	0.799183
1808	WBGene00022118	0.798857
1809	WBGene00018831	0.798671
1810	WBGene00007445	0.798474
1811	WBGene00013235	0.798257
1812	WBGene00020376	0.79819
1813	WBGene00000249	0.797879
1814	WBGene00008682	0.797812
1815	WBGene00019817	0.797773
1816	WBGene00007363	0.797651
1817	WBGene00000121	0.797636
1818	WBGene00016387	0.797064
1819	WBGene00020326	0.796649
1820	WBGene00002276	0.796413
1821	WBGene00009368	0.7964
1822	WBGene00015191	0.796263
1823	WBGene00002188	0.79619
1824	WBGene00013379	0.796176
1825	WBGene00001072	0.796144
1826	WBGene00022129	0.795981
1827	WBGene00002783	0.795828
1828	WBGene00008848	0.795415
1829	WBGene00009172	0.795371
1830	WBGene00014220	0.795205
1831	WBGene00016603	0.795115
1832	WBGene00011890	0.79479
1833	WBGene00007025	0.794456
1834	WBGene00000459	0.794377
1835	WBGene00003692	0.794356
1836	WBGene00021636	0.793726
1837	WBGene00017916	0.793314
1838	WBGene00000888	0.793101
1839	WBGene00022224	0.793052
1840	WBGene00020695	0.792927
1841	WBGene00019579	0.792909
1842	WBGene00008876	0.792678
1843	WBGene00019504	0.792476
1844	WBGene00003954	0.792301
1845	WBGene00016381	0.792257
1846	WBGene00007780	0.792072
1847	WBGene00012236	0.791936
1848	WBGene00000846	0.791817
1849	WBGene00020970	0.791622
1850	WBGene00013728	0.791584
1851	WBGene00021076	0.790978
1852	WBGene00019199	0.790805
1853	WBGene00010061	0.790661
1854	WBGene00012762	0.790362
1855	WBGene00010096	0.790205
1856	WBGene00018680	0.790181
1857	WBGene00015903	0.790054
1858	WBGene00018103	0.789435
1859	WBGene00017746	0.789248
1860	WBGene00002029	0.789174
1861	WBGene00016097	0.789132
1862	WBGene00002079	0.78909
1863	WBGene00010671	0.788919
1864	WBGene00004341	0.788328
1865	WBGene00000144	0.788222
1866	WBGene00015308	0.788162
1867	WBGene00018749	0.787901
1868	WBGene00002245	0.787759
1869	WBGene00013253	0.787621
1870	WBGene00008361	0.787615
1871	WBGene00016352	0.787389
1872	WBGene00017949	0.786833
1873	WBGene00006517	0.786519
1874	WBGene00012369	0.786367
1875	WBGene00011464	0.786356
1876	WBGene00010807	0.785933
1877	WBGene00020199	0.785924
1878	WBGene00020911	0.785722
1879	WBGene00011272	0.785334
1880	WBGene00014115	0.785161
1881	WBGene00022880	0.784759
1882	WBGene00020137	0.784675
1883	WBGene00044188	0.784655
1884	WBGene00021238	0.784607
1885	WBGene00015756	0.78457
1886	WBGene00004878	0.784567
1887	WBGene00007547	0.78447
1888	WBGene00004075	0.78434
1889	WBGene00009088	0.784022
1890	WBGene00003661	0.784008
1891	WBGene00007922	0.783971
1892	WBGene00015029	0.78373
1893	WBGene00001320	0.783579
1894	WBGene00003048	0.783376
1895	WBGene00008686	0.783309
1896	WBGene00004110	0.783222
1897	WBGene00019139	0.783105
1898	WBGene00013349	0.782885
1899	WBGene00020034	0.782817
1900	WBGene00013325	0.782793
1901	WBGene00021394	0.782736
1902	WBGene00011776	0.782692
1903	WBGene00009559	0.782513
1904	WBGene00020784	0.782263
1905	WBGene00010700	0.782029
1906	WBGene00015095	0.781765
1907	WBGene00022785	0.781677
1908	WBGene00002229	0.781104
1909	WBGene00006440	0.780981
1910	WBGene00019892	0.780869
1911	WBGene00004771	0.780764
1912	WBGene00001002	0.780415
1913	WBGene00018319	0.780054
1914	WBGene00006793	0.78003
1915	WBGene00010288	0.779983
1916	WBGene00015330	0.779772
1917	WBGene00019312	0.779748
1918	WBGene00004388	0.779628
1919	WBGene00006722	0.779359
1920	WBGene00004324	0.77919
1921	WBGene00044345	0.778524
1922	WBGene00015915	0.778048
1923	WBGene00022787	0.777899
1924	WBGene00022036	0.777762
1925	WBGene00009466	0.7777
1926	WBGene00022034	0.777659
1927	WBGene00016816	0.777602
1928	WBGene00016404	0.777488
1929	WBGene00007645	0.777355
1930	WBGene00021748	0.77731
1931	WBGene00008476	0.777255
1932	WBGene00004284	0.777077
1933	WBGene00019125	0.776891
1934	WBGene00001103	0.776722
1935	WBGene00016200	0.776675
1936	WBGene00044680	0.776527
1937	WBGene00011070	0.776418
1938	WBGene00021334	0.776358
1939	WBGene00011966	0.776053
1940	WBGene00013669	0.776029
1941	WBGene00006491	0.77588
1942	WBGene00012922	0.775851
1943	WBGene00012716	0.775805
1944	WBGene00002136	0.775775
1945	WBGene00010891	0.775229
1946	WBGene00007227	0.775144
1947	WBGene00017683	0.774944
1948	WBGene00045183	0.774856
1949	WBGene00012483	0.774754
1950	WBGene00016170	0.774571
1951	WBGene00010480	0.774546
1952	WBGene00008236	0.77452
1953	WBGene00007106	0.774114
1954	WBGene00017031	0.773915
1955	WBGene00018509	0.773863
1956	WBGene00004811	0.773645
1957	WBGene00009290	0.7733
1958	WBGene00012463	0.773182
1959	WBGene00000094	0.773018
1960	WBGene00003967	0.77257
1961	WBGene00007479	0.772543
1962	WBGene00009270	0.772538
1963	WBGene00004823	0.772465
1964	WBGene00006700	0.772416
1965	WBGene00007338	0.772281
1966	WBGene00002181	0.772215
1967	WBGene00013453	0.772068
1968	WBGene00008005	0.771935
1969	WBGene00003210	0.771906
1970	WBGene00018717	0.771576
1971	WBGene00014234	0.771414
1972	WBGene00002003	0.770741
1973	WBGene00044233	0.770717
1974	WBGene00016022	0.770661
1975	WBGene00045473	0.770539
1976	WBGene00007270	0.770133
1977	WBGene00003218	0.77007
1978	WBGene00016202	0.770048
1979	WBGene00011945	0.7698
1980	WBGene00018064	0.7697
1981	WBGene00013024	0.769622
1982	WBGene00007118	0.76959
1983	WBGene00011143	0.769535
1984	WBGene00009673	0.769058
1985	WBGene00011788	0.768844
1986	WBGene00002143	0.768781
1987	WBGene00021554	0.768735
1988	WBGene00016492	0.768394
1989	WBGene00000461	0.768014
1990	WBGene00012300	0.767793
1991	WBGene00008417	0.767434
1992	WBGene00004886	0.76726
1993	WBGene00008220	0.767207
1994	WBGene00009435	0.767189
1995	WBGene00017481	0.767135
1996	WBGene00044149	0.766919
1997	WBGene00010459	0.766853
[truncated: 11,332 more rows]
