# Supplementary material for: Bacterial diet affects the age-dependent decline of associative learning in Caenorhabditis elegans
Source: eLife. 2023 May 30;12:e81418. doi: 10.7554/eLife.81418 (PMC10229132; doi:10.7554/eLife.81418)
Supplement: Figure 9—figure supplement 2—source data 2. [file elife-81418-fig9-figsupp2-data2.xlsx]

## Sheet: Sheet1
Source data 2 for Figure 9-Figure supplement 2B
PC2
Rank	Gene ID	% condtribution
1	WBGene00010473	12.0699
2	WBGene00007605	11.8081
3	WBGene00016204	11.268
4	WBGene00017199	11.1857
5	WBGene00000785	10.0775
6	WBGene00019605	9.82467
7	WBGene00013901	9.39581
8	WBGene00021070	8.68518
9	WBGene00009493	8.18754
10	WBGene00015573	8.14759
11	WBGene00011668	8.0372
12	WBGene00022665	7.55404
13	WBGene00020128	7.48626
14	WBGene00019830	6.96107
15	WBGene00001817	6.22218
16	WBGene00044107	6.21301
17	WBGene00006404	6.16375
18	WBGene00018400	6.06225
19	WBGene00020592	5.962
20	WBGene00012683	5.8868
21	WBGene00003094	5.78736
22	WBGene00014162	5.75004
23	WBGene00015828	5.7091
24	WBGene00007885	5.60862
25	WBGene00019105	5.31926
26	WBGene00021503	5.29699
27	WBGene00003093	5.12823
28	WBGene00004997	4.97179
29	WBGene00007422	4.96124
30	WBGene00003095	4.95376
31	WBGene00004878	4.92527
32	WBGene00009982	4.88296
33	WBGene00015572	4.78503
34	WBGene00016698	4.74206
35	WBGene00010746	4.66006
36	WBGene00011474	4.63129
37	WBGene00020954	4.61738
38	WBGene00010274	4.60251
39	WBGene00000603	4.51204
40	WBGene00009466	4.44616
41	WBGene00013216	4.3884
42	WBGene00021720	4.37082
43	WBGene00020881	4.34035
44	WBGene00015455	4.34031
45	WBGene00020788	4.33756
46	WBGene00009453	4.24092
47	WBGene00016848	4.2017
48	WBGene00013900	4.14377
49	WBGene00014136	4.13082
50	WBGene00000133	4.10888
51	WBGene00010277	4.07381
52	WBGene00021703	4.06004
53	WBGene00019232	4.04533
54	WBGene00008220	4.03512
55	WBGene00008484	3.98396
56	WBGene00001754	3.88929
57	WBGene00010257	3.84064
58	WBGene00003411	3.77345
59	WBGene00018351	3.74405
60	WBGene00000058	3.7384
61	WBGene00043097	3.72132
62	WBGene00012176	3.67852
63	WBGene00009347	3.67386
64	WBGene00011364	3.65708
65	WBGene00011305	3.6217
66	WBGene00012163	3.61167
67	WBGene00021335	3.60351
68	WBGene00001776	3.56331
69	WBGene00016639	3.51126
70	WBGene00000683	3.40437
71	WBGene00007507	3.34145
72	WBGene00010752	3.33796
73	WBGene00019565	3.32441
74	WBGene00000625	3.29844
75	WBGene00045397	3.23752
76	WBGene00007454	3.23564
77	WBGene00019579	3.22755
78	WBGene00010769	3.22232
79	WBGene00000784	3.21872
80	WBGene00010505	3.21734
81	WBGene00044302	3.20972
82	WBGene00013180	3.19678
83	WBGene00020617	3.19085
84	WBGene00016596	3.16069
85	WBGene00012412	3.12617
86	WBGene00000672	3.08223
87	WBGene00020015	3.06651
88	WBGene00018062	3.06589
89	WBGene00007336	3.04969
90	WBGene00017596	3.03401
91	WBGene00021107	3.02838
92	WBGene00007388	3.02081
93	WBGene00000412	3.0121
94	WBGene00017892	2.9955
95	WBGene00011486	2.97294
96	WBGene00002262	2.96485
97	WBGene00007509	2.96074
98	WBGene00017186	2.95808
99	WBGene00000971	2.94435
100	WBGene00007531	2.94159
101	WBGene00003402	2.93862
102	WBGene00044724	2.93768
103	WBGene00015735	2.93435
104	WBGene00012917	2.91358
105	WBGene00007858	2.912
106	WBGene00015756	2.90223
107	WBGene00010426	2.88381
108	WBGene00011494	2.87207
109	WBGene00008731	2.85381
110	WBGene00015400	2.83979
111	WBGene00003722	2.83125
112	WBGene00012177	2.82505
113	WBGene00017595	2.82253
114	WBGene00219308	2.79147
115	WBGene00002255	2.76786
116	WBGene00020672	2.69509
117	WBGene00007439	2.69051
118	WBGene00000687	2.68144
119	WBGene00022587	2.6776
120	WBGene00016860	2.66813
121	WBGene00044644	2.65847
122	WBGene00004300	2.65527
123	WBGene00011564	2.65299
124	WBGene00017592	2.6507
125	WBGene00010724	2.64015
126	WBGene00012118	2.62961
127	WBGene00011244	2.61933
128	WBGene00019411	2.60958
129	WBGene00017378	2.59496
130	WBGene00008944	2.59286
131	WBGene00022224	2.58711
132	WBGene00004061	2.56849
133	WBGene00018055	2.56258
134	WBGene00010063	2.55911
135	WBGene00015776	2.55447
136	WBGene00004976	2.54876
137	WBGene00044245	2.54724
138	WBGene00012018	2.52336
139	WBGene00019515	2.51747
140	WBGene00004227	2.50343
141	WBGene00016786	2.49988
142	WBGene00010904	2.48571
143	WBGene00015768	2.48038
144	WBGene00019070	2.4758
145	WBGene00008315	2.47397
146	WBGene00021066	2.45653
147	WBGene00001889	2.45015
148	WBGene00044615	2.44777
149	WBGene00086565	2.42305
150	WBGene00012564	2.41854
151	WBGene00008110	2.41836
152	WBGene00021814	2.41454
153	WBGene00000698	2.40829
154	WBGene00004155	2.40826
155	WBGene00011839	2.40561
156	WBGene00019746	2.39868
157	WBGene00013713	2.39797
158	WBGene00012591	2.38223
159	WBGene00021875	2.3786
160	WBGene00045405	2.37075
161	WBGene00015709	2.3526
162	WBGene00010595	2.3505
163	WBGene00021197	2.34855
164	WBGene00001784	2.34601
165	WBGene00009146	2.34104
166	WBGene00000111	2.33969
167	WBGene00011428	2.33736
168	WBGene00009957	2.33352
169	WBGene00016066	2.33276
170	WBGene00008810	2.30935
171	WBGene00020952	2.30412
172	WBGene00022338	2.30296
173	WBGene00044389	2.29614
174	WBGene00001885	2.29506
175	WBGene00010204	2.28912
176	WBGene00015456	2.27913
177	WBGene00010116	2.27816
178	WBGene00002105	2.27521
179	WBGene00004358	2.26734
180	WBGene00001462	2.26371
181	WBGene00012529	2.26233
182	WBGene00009485	2.25784
183	WBGene00001918	2.25155
184	WBGene00002054	2.24979
185	WBGene00002265	2.24912
186	WBGene00007950	2.24153
187	WBGene00008127	2.23977
188	WBGene00021262	2.23431
189	WBGene00010749	2.23114
190	WBGene00006915	2.22228
191	WBGene00003705	2.22227
192	WBGene00022679	2.20972
193	WBGene00003625	2.2053
194	WBGene00002056	2.17976
195	WBGene00002270	2.16131
196	WBGene00002021	2.1604
197	WBGene00018223	2.15424
198	WBGene00009495	2.14949
199	WBGene00009165	2.11928
200	WBGene00007180	2.11697
201	WBGene00003730	2.11673
202	WBGene00013594	2.1154
203	WBGene00008454	2.11445
204	WBGene00000720	2.1127
205	WBGene00044502	2.10307
206	WBGene00007808	2.1029
207	WBGene00013091	2.10265
208	WBGene00006272	2.10092
209	WBGene00012518	2.09781
210	WBGene00008634	2.07769
211	WBGene00012130	2.07298
212	WBGene00000608	2.06832
213	WBGene00017334	2.0548
214	WBGene00015878	2.05445
215	WBGene00010411	2.05078
216	WBGene00020033	2.04107
217	WBGene00011798	2.04009
218	WBGene00013046	2.03591
219	WBGene00004192	2.02793
220	WBGene00010238	2.02707
221	WBGene00016551	2.02671
222	WBGene00044529	2.02601
223	WBGene00044607	2.02095
224	WBGene00013119	2.02063
225	WBGene00013055	2.01992
226	WBGene00000176	2.01897
227	WBGene00007508	2.01793
228	WBGene00018398	2.00809
229	WBGene00008560	2.00581
230	WBGene00021818	2.00413
231	WBGene00000215	2.00309
232	WBGene00002106	2.0002
233	WBGene00008273	1.98449
234	WBGene00044586	1.97641
235	WBGene00016379	1.97228
236	WBGene00012664	1.97196
237	WBGene00017431	1.97185
238	WBGene00012464	1.96083
239	WBGene00000752	1.9589
240	WBGene00003407	1.9544
241	WBGene00015947	1.95083
242	WBGene00022076	1.94811
243	WBGene00017322	1.93385
244	WBGene00009686	1.9284
245	WBGene00020126	1.92831
246	WBGene00003844	1.92649
247	WBGene00020080	1.92062
248	WBGene00022506	1.91843
249	WBGene00011340	1.91375
250	WBGene00044672	1.90818
251	WBGene00018354	1.90689
252	WBGene00023503	1.90523
253	WBGene00045265	1.89612
254	WBGene00018543	1.89573
255	WBGene00012101	1.88963
256	WBGene00020981	1.88261
257	WBGene00009983	1.87548
258	WBGene00015050	1.87521
259	WBGene00009518	1.87485
260	WBGene00007460	1.86462
261	WBGene00018803	1.86203
262	WBGene00007890	1.86151
263	WBGene00019097	1.85586
264	WBGene00008917	1.85442
265	WBGene00017507	1.85203
266	WBGene00019622	1.84925
267	WBGene00022641	1.84416
268	WBGene00017681	1.84016
269	WBGene00022413	1.84014
270	WBGene00004196	1.83972
271	WBGene00009818	1.83853
272	WBGene00003092	1.83758
273	WBGene00003645	1.83565
274	WBGene00017949	1.83558
275	WBGene00045461	1.83246
276	WBGene00000984	1.83203
277	WBGene00020192	1.82626
278	WBGene00045390	1.82167
279	WBGene00020862	1.8214
280	WBGene00219413	1.82
281	WBGene00021741	1.81937
282	WBGene00002111	1.809
283	WBGene00045457	1.80689
284	WBGene00011099	1.80339
285	WBGene00003756	1.80312
286	WBGene00012662	1.79468
287	WBGene00017160	1.79258
288	WBGene00016585	1.79137
289	WBGene00018393	1.78926
290	WBGene00007073	1.78903
291	WBGene00019633	1.77932
292	WBGene00008311	1.77771
293	WBGene00007725	1.77664
294	WBGene00045456	1.77413
295	WBGene00019895	1.77398
296	WBGene00015476	1.77381
297	WBGene00008553	1.77344
298	WBGene00010723	1.77148
299	WBGene00018874	1.767
300	WBGene00004353	1.76246
301	WBGene00017836	1.75761
302	WBGene00015340	1.75534
303	WBGene00012297	1.75253
304	WBGene00008111	1.7495
305	WBGene00019598	1.74834
306	WBGene00008357	1.74042
307	WBGene00021700	1.73904
308	WBGene00001623	1.73859
309	WBGene00008596	1.73725
310	WBGene00008923	1.73339
311	WBGene00015010	1.73262
312	WBGene00022574	1.73253
313	WBGene00018101	1.72918
314	WBGene00003579	1.72852
315	WBGene00003763	1.72662
316	WBGene00018852	1.72646
317	WBGene00010644	1.7229
318	WBGene00044488	1.71746
319	WBGene00009637	1.71603
320	WBGene00015950	1.71468
321	WBGene00001053	1.71395
322	WBGene00045050	1.71105
323	WBGene00009096	1.70987
324	WBGene00018210	1.70911
325	WBGene00015427	1.70814
326	WBGene00007423	1.70675
327	WBGene00022743	1.70672
328	WBGene00009628	1.70621
329	WBGene00044403	1.70193
330	WBGene00013221	1.69889
331	WBGene00021325	1.69829
332	WBGene00017969	1.698
333	WBGene00013647	1.69321
334	WBGene00012312	1.68743
335	WBGene00019488	1.68578
336	WBGene00011072	1.68261
337	WBGene00003764	1.68255
338	WBGene00010848	1.68121
339	WBGene00008963	1.68013
340	WBGene00000699	1.67961
341	WBGene00015791	1.67796
342	WBGene00004003	1.6777
343	WBGene00011517	1.67767
344	WBGene00003602	1.67099
345	WBGene00015574	1.65814
346	WBGene00019182	1.65524
347	WBGene00014669	1.65181
348	WBGene00021547	1.64876
349	WBGene00022410	1.64583
350	WBGene00023407	1.64561
351	WBGene00012339	1.64352
352	WBGene00005649	1.64176
353	WBGene00002088	1.64009
354	WBGene00011073	1.63879
355	WBGene00016785	1.63837
356	WBGene00007321	1.63362
357	WBGene00016634	1.63246
358	WBGene00011103	1.63189
359	WBGene00012853	1.63146
360	WBGene00015783	1.63089
361	WBGene00014300	1.62714
362	WBGene00013613	1.62056
363	WBGene00008830	1.61899
364	WBGene00020869	1.61664
365	WBGene00009504	1.61627
366	WBGene00000175	1.6158
367	WBGene00018755	1.61499
368	WBGene00001523	1.61372
369	WBGene00045416	1.61071
370	WBGene00270319	1.60659
371	WBGene00021602	1.60573
372	WBGene00006912	1.6053
373	WBGene00020451	1.60489
374	WBGene00009388	1.60444
375	WBGene00015333	1.60398
376	WBGene00022441	1.60275
377	WBGene00017536	1.60065
378	WBGene00000172	1.60009
379	WBGene00009380	1.59756
380	WBGene00020326	1.59747
381	WBGene00044362	1.5969
382	WBGene00018850	1.59578
383	WBGene00020016	1.59183
384	WBGene00019955	1.59122
385	WBGene00007811	1.57405
386	WBGene00020878	1.57254
387	WBGene00013802	1.57187
388	WBGene00010982	1.57129
389	WBGene00009243	1.56874
390	WBGene00019599	1.56829
391	WBGene00001559	1.56736
392	WBGene00016877	1.56089
393	WBGene00020004	1.56022
394	WBGene00021865	1.55868
395	WBGene00044256	1.55672
396	WBGene00000279	1.55465
397	WBGene00012970	1.55463
398	WBGene00021671	1.55453
399	WBGene00019540	1.55448
400	WBGene00003711	1.55166
401	WBGene00010740	1.54762
402	WBGene00014697	1.54209
403	WBGene00008356	1.5367
404	WBGene00020369	1.53584
405	WBGene00002058	1.5341
406	WBGene00011019	1.53396
407	WBGene00008366	1.53377
408	WBGene00010451	1.53257
409	WBGene00015393	1.52993
410	WBGene00044291	1.52898
411	WBGene00019846	1.52511
412	WBGene00009824	1.52365
413	WBGene00019138	1.52258
414	WBGene00010851	1.52135
415	WBGene00008132	1.5201
416	WBGene00016759	1.51967
417	WBGene00013303	1.51805
418	WBGene00007829	1.51085
419	WBGene00044901	1.50976
420	WBGene00008394	1.50953
421	WBGene00020359	1.50872
422	WBGene00001251	1.50242
423	WBGene00002057	1.50173
424	WBGene00010850	1.50034
425	WBGene00017093	1.49939
426	WBGene00011182	1.4975
427	WBGene00022582	1.49608
428	WBGene00007926	1.49376
429	WBGene00019753	1.48501
430	WBGene00019233	1.48476
431	WBGene00001602	1.48051
432	WBGene00016335	1.47936
433	WBGene00019832	1.47546
434	WBGene00003471	1.47107
435	WBGene00003966	1.47031
436	WBGene00001455	1.46871
437	WBGene00206418	1.46868
438	WBGene00000669	1.46768
439	WBGene00021942	1.46688
440	WBGene00019880	1.46577
441	WBGene00011733	1.46557
442	WBGene00044776	1.46408
443	WBGene00003755	1.46378
444	WBGene00023284	1.46183
445	WBGene00019139	1.46044
446	WBGene00018430	1.45951
447	WBGene00017880	1.45947
448	WBGene00003480	1.45847
449	WBGene00000690	1.45608
450	WBGene00012070	1.45434
451	WBGene00014106	1.45401
452	WBGene00045488	1.45288
453	WBGene00015949	1.45214
454	WBGene00010475	1.45002
455	WBGene00021981	1.44791
456	WBGene00001464	1.44744
457	WBGene00017193	1.44167
458	WBGene00013923	1.43991
459	WBGene00235352	1.43927
460	WBGene00010273	1.43876
461	WBGene00020455	1.43383
462	WBGene00012408	1.4335
463	WBGene00007362	1.43254
464	WBGene00011708	1.43049
465	WBGene00010584	1.42943
466	WBGene00015608	1.42897
467	WBGene00045473	1.42442
468	WBGene00009884	1.42436
469	WBGene00022411	1.4233
470	WBGene00003571	1.42184
471	WBGene00017732	1.4216
472	WBGene00018590	1.42026
473	WBGene00015495	1.41922
474	WBGene00018683	1.41867
475	WBGene00021876	1.41852
476	WBGene00269391	1.41823
477	WBGene00016797	1.41807
478	WBGene00012134	1.41516
479	WBGene00018117	1.41499
480	WBGene00017724	1.41369
481	WBGene00008626	1.41025
482	WBGene00044137	1.40381
483	WBGene00009097	1.40044
484	WBGene00020445	1.39953
485	WBGene00018787	1.39927
486	WBGene00019699	1.39894
487	WBGene00016763	1.39763
488	WBGene00014152	1.39648
489	WBGene00015434	1.39626
490	WBGene00017197	1.39616
491	WBGene00008542	1.39498
492	WBGene00020760	1.39201
493	WBGene00020943	1.3915
494	WBGene00044500	1.3911
495	WBGene00011763	1.39083
496	WBGene00016721	1.38856
497	WBGene00001457	1.38843
498	WBGene00015012	1.38685
499	WBGene00007275	1.38651
500	WBGene00195073	1.38569
501	WBGene00016683	1.38536
502	WBGene00001886	1.38292
503	WBGene00012467	1.38244
504	WBGene00012778	1.38126
505	WBGene00008595	1.37968
506	WBGene00009640	1.3786
507	WBGene00044977	1.37842
508	WBGene00017048	1.3769
509	WBGene00021894	1.37487
510	WBGene00022196	1.37463
511	WBGene00010973	1.3736
512	WBGene00015085	1.36856
513	WBGene00020620	1.36536
514	WBGene00003706	1.36424
515	WBGene00017537	1.36363
516	WBGene00018707	1.36347
517	WBGene00008583	1.36214
518	WBGene00008914	1.36195
519	WBGene00022142	1.36173
520	WBGene00014091	1.35847
521	WBGene00018333	1.35767
522	WBGene00010341	1.3567
523	WBGene00044588	1.35363
524	WBGene00017513	1.35316
525	WBGene00011856	1.35155
526	WBGene00007222	1.35062
527	WBGene00016758	1.34968
528	WBGene00008709	1.34963
529	WBGene00016013	1.34891
530	WBGene00019750	1.34817
531	WBGene00001890	1.34731
532	WBGene00010980	1.34679
533	WBGene00017473	1.34667
534	WBGene00016174	1.34652
535	WBGene00007633	1.34559
536	WBGene00007497	1.34457
537	WBGene00007431	1.34448
538	WBGene00044718	1.34374
539	WBGene00012585	1.34258
540	WBGene00006609	1.34049
541	WBGene00006741	1.33905
542	WBGene00023492	1.33798
543	WBGene00012757	1.33533
544	WBGene00017428	1.33507
545	WBGene00013757	1.33505
546	WBGene00010472	1.33482
547	WBGene00022486	1.33439
548	WBGene00021927	1.33251
549	WBGene00001795	1.32475
550	WBGene00011006	1.32451
551	WBGene00019826	1.32409
552	WBGene00012175	1.32198
553	WBGene00012593	1.32151
554	WBGene00017069	1.31934
555	WBGene00044024	1.31815
556	WBGene00011824	1.31812
557	WBGene00009917	1.31668
558	WBGene00000031	1.31585
559	WBGene00021193	1.31539
560	WBGene00007506	1.31531
561	WBGene00007840	1.31457
562	WBGene00009483	1.31365
563	WBGene00000973	1.31362
564	WBGene00000731	1.31165
565	WBGene00006445	1.30692
566	WBGene00023489	1.30655
567	WBGene00001752	1.30637
568	WBGene00194926	1.30621
569	WBGene00022313	1.30592
570	WBGene00007119	1.30569
571	WBGene00021133	1.30476
572	WBGene00020774	1.30447
573	WBGene00018737	1.30404
574	WBGene00015733	1.30323
575	WBGene00018249	1.30292
576	WBGene00016219	1.302
577	WBGene00019617	1.29864
578	WBGene00015386	1.29703
579	WBGene00017091	1.29462
580	WBGene00019430	1.29453
581	WBGene00009995	1.29352
582	WBGene00043062	1.29056
583	WBGene00007185	1.29013
584	WBGene00018692	1.2901
585	WBGene00007553	1.28828
586	WBGene00001781	1.28712
587	WBGene00018696	1.28688
588	WBGene00016365	1.28609
589	WBGene00009639	1.2859
590	WBGene00016555	1.28586
591	WBGene00010786	1.28492
592	WBGene00013987	1.28438
593	WBGene00004135	1.2842
594	WBGene00017244	1.28415
595	WBGene00016805	1.2832
596	WBGene00021076	1.28186
597	WBGene00000713	1.28124
598	WBGene00022093	1.28112
599	WBGene00003704	1.27971
600	WBGene00044554	1.27933
601	WBGene00016434	1.27919
602	WBGene00006947	1.27907
603	WBGene00003572	1.27899
604	WBGene00002137	1.27817
605	WBGene00013755	1.27651
606	WBGene00020611	1.2758
607	WBGene00010315	1.27562
608	WBGene00016568	1.2724
609	WBGene00015082	1.27174
610	WBGene00000601	1.27152
611	WBGene00017124	1.2701
612	WBGene00000665	1.26954
613	WBGene00016319	1.26638
614	WBGene00008863	1.26449
615	WBGene00045245	1.26405
616	WBGene00018634	1.26269
617	WBGene00194985	1.26184
618	WBGene00001247	1.26139
619	WBGene00009236	1.26117
620	WBGene00016502	1.26083
621	WBGene00008680	1.26016
622	WBGene00219234	1.25992
623	WBGene00015919	1.25903
624	WBGene00010795	1.25887
625	WBGene00000284	1.2577
626	WBGene00011404	1.25746
627	WBGene00023493	1.25679
628	WBGene00001461	1.25611
629	WBGene00001753	1.25574
630	WBGene00045271	1.25481
631	WBGene00011392	1.25371
632	WBGene00013836	1.25362
633	WBGene00016781	1.25306
634	WBGene00003941	1.25297
635	WBGene00006533	1.25195
636	WBGene00008435	1.25059
637	WBGene00015183	1.25055
638	WBGene00003699	1.25026
639	WBGene00012533	1.24987
640	WBGene00019589	1.24957
641	WBGene00011069	1.24935
642	WBGene00004309	1.2488
643	WBGene00015339	1.24841
644	WBGene00007932	1.2476
645	WBGene00008263	1.24747
646	WBGene00000174	1.24711
647	WBGene00015437	1.24649
648	WBGene00015965	1.24532
649	WBGene00022331	1.24431
650	WBGene00194956	1.24317
651	WBGene00010712	1.24222
652	WBGene00002089	1.24216
653	WBGene00022592	1.24171
654	WBGene00044073	1.24122
655	WBGene00001899	1.24079
656	WBGene00012449	1.24056
657	WBGene00000641	1.24017
658	WBGene00020616	1.23732
659	WBGene00006380	1.23712
660	WBGene00001917	1.23391
661	WBGene00194848	1.23331
662	WBGene00011003	1.23255
663	WBGene00003786	1.23244
664	WBGene00010737	1.23163
665	WBGene00013555	1.23155
666	WBGene00021309	1.23143
667	WBGene00009247	1.22945
668	WBGene00011393	1.2289
669	WBGene00001990	1.22845
670	WBGene00008707	1.22778
671	WBGene00000084	1.22714
672	WBGene00016760	1.22486
673	WBGene00007130	1.22417
674	WBGene00000864	1.22384
675	WBGene00021272	1.2211
676	WBGene00195186	1.22056
677	WBGene00012948	1.22048
678	WBGene00001591	1.2203
679	WBGene00206414	1.2191
680	WBGene00003680	1.21869
681	WBGene00013118	1.21802
682	WBGene00011289	1.21771
683	WBGene00044485	1.2153
684	WBGene00005271	1.21492
685	WBGene00003746	1.21078
686	WBGene00008681	1.21008
687	WBGene00008969	1.20959
688	WBGene00004062	1.20912
689	WBGene00003690	1.2074
690	WBGene00003726	1.20724
691	WBGene00003876	1.20194
692	WBGene00022047	1.19993
693	WBGene00219271	1.19941
694	WBGene00010133	1.19868
695	WBGene00019022	1.19849
696	WBGene00022634	1.19834
697	WBGene00189943	1.19723
698	WBGene00001730	1.19384
699	WBGene00022254	1.19132
700	WBGene00008365	1.18907
701	WBGene00012428	1.18427
702	WBGene00015409	1.18254
703	WBGene00003999	1.18179
704	WBGene00009634	1.18177
705	WBGene00013203	1.18142
706	WBGene00022131	1.18085
707	WBGene00017700	1.18003
708	WBGene00010137	1.17974
709	WBGene00011497	1.17753
710	WBGene00004965	1.17662
711	WBGene00006627	1.17656
712	WBGene00008669	1.17446
713	WBGene00015602	1.17393
714	WBGene00017998	1.17356
715	WBGene00022325	1.17322
716	WBGene00010865	1.17226
717	WBGene00000136	1.17192
718	WBGene00019208	1.17176
719	WBGene00009081	1.1651
720	WBGene00002257	1.16501
721	WBGene00012938	1.16435
722	WBGene00013894	1.16357
723	WBGene00045418	1.16266
724	WBGene00008564	1.1624
725	WBGene00016197	1.16108
726	WBGene00016362	1.16107
727	WBGene00018515	1.16088
728	WBGene00020924	1.15909
729	WBGene00013146	1.15839
730	WBGene00044283	1.15806
731	WBGene00020626	1.15585
732	WBGene00000732	1.15575
733	WBGene00043308	1.15482
734	WBGene00001163	1.15474
735	WBGene00020449	1.15416
736	WBGene00009984	1.15369
737	WBGene00013587	1.15351
738	WBGene00017100	1.15331
739	WBGene00016492	1.1532
740	WBGene00009595	1.15271
741	WBGene00002199	1.15269
742	WBGene00010617	1.15221
743	WBGene00000733	1.15115
744	WBGene00219493	1.14964
745	WBGene00012923	1.14918
746	WBGene00015247	1.149
747	WBGene00019815	1.14882
748	WBGene00010457	1.14829
749	WBGene00021157	1.14761
750	WBGene00020576	1.1475
751	WBGene00011586	1.14475
752	WBGene00007557	1.14466
753	WBGene00021028	1.1444
754	WBGene00022573	1.14311
755	WBGene00044029	1.14207
756	WBGene00015471	1.14198
757	WBGene00004364	1.14002
758	WBGene00010258	1.1395
759	WBGene00018084	1.13841
760	WBGene00044260	1.13828
761	WBGene00018715	1.13805
762	WBGene00004924	1.13464
763	WBGene00021543	1.1345
764	WBGene00001858	1.13442
765	WBGene00077593	1.13437
766	WBGene00001089	1.13359
767	WBGene00017718	1.13355
768	WBGene00008462	1.13322
769	WBGene00013459	1.13247
770	WBGene00012487	1.13065
771	WBGene00019234	1.1302
772	WBGene00003647	1.12968
773	WBGene00010117	1.12957
774	WBGene00000795	1.12902
775	WBGene00010873	1.12693
776	WBGene00012824	1.12651
777	WBGene00011677	1.12608
778	WBGene00001059	1.12518
779	WBGene00004195	1.12501
780	WBGene00012252	1.12284
781	WBGene00001242	1.1227
782	WBGene00006677	1.12266
783	WBGene00006679	1.12202
784	WBGene00008358	1.122
785	WBGene00008847	1.12089
786	WBGene00044316	1.11876
787	WBGene00008793	1.11847
788	WBGene00000117	1.11657
789	WBGene00021321	1.1164
790	WBGene00012279	1.11581
791	WBGene00010102	1.11577
792	WBGene00010424	1.11573
793	WBGene00013516	1.11486
794	WBGene00016343	1.11405
795	WBGene00011366	1.1134
796	WBGene00008036	1.11288
797	WBGene00003752	1.1127
798	WBGene00002188	1.11258
799	WBGene00269421	1.11161
800	WBGene00044680	1.11155
801	WBGene00001055	1.11023
802	WBGene00009636	1.10861
803	WBGene00022858	1.10431
804	WBGene00000703	1.10364
805	WBGene00021565	1.10184
806	WBGene00015172	1.10125
807	WBGene00016719	1.0978
808	WBGene00013352	1.0978
809	WBGene00017023	1.09649
810	WBGene00017103	1.09632
811	WBGene00017001	1.09587
812	WBGene00010934	1.09468
813	WBGene00003374	1.09398
814	WBGene00195176	1.09364
815	WBGene00001468	1.09354
816	WBGene00019873	1.0935
817	WBGene00022018	1.09295
818	WBGene00008424	1.09219
819	WBGene00009528	1.09102
820	WBGene00007253	1.09016
821	WBGene00001716	1.08987
822	WBGene00010545	1.08924
823	WBGene00004059	1.08883
824	WBGene00010759	1.08814
825	WBGene00016368	1.08779
826	WBGene00010019	1.08718
827	WBGene00017291	1.08674
828	WBGene00019473	1.08589
829	WBGene00013027	1.08473
830	WBGene00016046	1.08388
831	WBGene00017591	1.08382
832	WBGene00195071	1.08237
833	WBGene00045013	1.08195
834	WBGene00044674	1.08051
835	WBGene00012532	1.08023
836	WBGene00008820	1.08004
837	WBGene00010262	1.07676
838	WBGene00016028	1.0743
839	WBGene00006583	1.07407
840	WBGene00008450	1.07385
841	WBGene00001783	1.07295
842	WBGene00012446	1.07241
843	WBGene00016646	1.07139
844	WBGene00007857	1.07102
845	WBGene00015539	1.07097
846	WBGene00018352	1.07089
847	WBGene00018206	1.07044
848	WBGene00008593	1.06999
849	WBGene00007601	1.06935
850	WBGene00022386	1.06842
851	WBGene00011374	1.06743
852	WBGene00017010	1.06682
853	WBGene00015483	1.06661
854	WBGene00015647	1.06613
855	WBGene00019114	1.06514
856	WBGene00003686	1.06501
857	WBGene00006470	1.06397
858	WBGene00009969	1.0628
859	WBGene00015433	1.06095
860	WBGene00016631	1.06019
861	WBGene00235295	1.05955
862	WBGene00015262	1.05847
863	WBGene00013197	1.05748
864	WBGene00010888	1.05645
865	WBGene00044296	1.0562
866	WBGene00012560	1.05518
867	WBGene00012330	1.05455
868	WBGene00012457	1.05384
869	WBGene00044034	1.05188
870	WBGene00003721	1.05186
871	WBGene00008296	1.05181
872	WBGene00018594	1.0518
873	WBGene00006784	1.0515
874	WBGene00012461	1.05134
875	WBGene00007455	1.04927
876	WBGene00019379	1.04859
877	WBGene00012450	1.04756
878	WBGene00011454	1.0457
879	WBGene00016114	1.04527
880	WBGene00017901	1.0452
881	WBGene00004228	1.0441
882	WBGene00019546	1.04343
883	WBGene00002173	1.04322
884	WBGene00017613	1.04233
885	WBGene00000232	1.04215
886	WBGene00002139	1.04114
887	WBGene00022326	1.04026
888	WBGene00044176	1.03997
889	WBGene00004183	1.03872
890	WBGene00011928	1.03847
891	WBGene00013888	1.03806
892	WBGene00020501	1.03797
893	WBGene00003743	1.03781
894	WBGene00011097	1.03773
895	WBGene00020850	1.03666
896	WBGene00019069	1.03091
897	WBGene00009334	1.02971
898	WBGene00003444	1.02931
899	WBGene00003753	1.02833
900	WBGene00019207	1.02745
901	WBGene00021532	1.02743
902	WBGene00013717	1.02724
903	WBGene00019988	1.02694
904	WBGene00015956	1.02691
905	WBGene00001760	1.02654
906	WBGene00017834	1.02586
907	WBGene00002198	1.02496
908	WBGene00016649	1.02445
909	WBGene00016366	1.0235
910	WBGene00007881	1.02348
911	WBGene00013602	1.02225
912	WBGene00044570	1.02031
913	WBGene00003740	1.01898
914	WBGene00010822	1.01849
915	WBGene00010867	1.01833
916	WBGene00015037	1.01794
917	WBGene00018688	1.01745
918	WBGene00015558	1.01713
919	WBGene00001761	1.01635
920	WBGene00015410	1.01484
921	WBGene00012536	1.01409
922	WBGene00022181	1.01406
923	WBGene00001947	1.01404
924	WBGene00004197	1.01353
925	WBGene00010513	1.01352
926	WBGene00010215	1.01307
927	WBGene00008360	1.01294
928	WBGene00019020	1.01239
929	WBGene00017265	1.01206
930	WBGene00004020	1.01055
931	WBGene00006767	1.0101
932	WBGene00008582	1.00989
933	WBGene00018056	1.0082
934	WBGene00015258	1.0078
935	WBGene00023172	1.00744
936	WBGene00004950	1.00614
937	WBGene00006388	1.00596
938	WBGene00009645	1.0053
939	WBGene00014055	1.00525
940	WBGene00020587	1.0031
941	WBGene00004256	1.00303
942	WBGene00016282	1.00234
943	WBGene00019839	1.00163
944	WBGene00002179	1.0016
945	WBGene00022144	1.00151
946	WBGene00016435	1.00148
947	WBGene00003837	1.00126
948	WBGene00021625	1.00116
949	WBGene00000611	1.0011
950	WBGene00009988	1.00094
951	WBGene00004198	1.00078
952	WBGene00011908	1.00014
953	WBGene00000057	0.999754
954	WBGene00001993	0.999739
955	WBGene00010004	0.999286
956	WBGene00001433	0.999011
957	WBGene00020861	0.998555
958	WBGene00010945	0.998294
959	WBGene00044459	0.99769
960	WBGene00000512	0.996559
961	WBGene00016942	0.996183
962	WBGene00019184	0.995912
963	WBGene00000539	0.995794
964	WBGene00016152	0.994173
965	WBGene00044541	0.994103
966	WBGene00007691	0.992769
967	WBGene00012720	0.992121
968	WBGene00000526	0.991888
969	WBGene00044712	0.991021
970	WBGene00008097	0.990459
971	WBGene00043989	0.987834
972	WBGene00003463	0.987569
973	WBGene00008598	0.986734
974	WBGene00009406	0.986403
975	WBGene00013541	0.98637
976	WBGene00206483	0.986135
977	WBGene00006561	0.985886
978	WBGene00013104	0.983426
979	WBGene00006620	0.983384
980	WBGene00018725	0.982761
981	WBGene00013335	0.982453
982	WBGene00010628	0.981801
983	WBGene00255594	0.981257
984	WBGene00016367	0.98124
985	WBGene00008375	0.980645
986	WBGene00001778	0.980057
987	WBGene00000067	0.978907
988	WBGene00009056	0.978206
989	WBGene00002020	0.97769
990	WBGene00009160	0.977674
991	WBGene00002048	0.976411
992	WBGene00007178	0.976225
993	WBGene00012228	0.975761
994	WBGene00001883	0.974556
995	WBGene00001945	0.974554
996	WBGene00000751	0.974323
997	WBGene00008436	0.97365
998	WBGene00011622	0.972706
999	WBGene00045297	0.972658
1000	WBGene00002019	0.972394
1001	WBGene00022472	0.972006
1002	WBGene00001859	0.971195
1003	WBGene00008113	0.970922
1004	WBGene00000715	0.970738
1005	WBGene00009606	0.970226
1006	WBGene00007775	0.969813
1007	WBGene00008120	0.96834
1008	WBGene00206419	0.967552
1009	WBGene00015370	0.966616
1010	WBGene00012480	0.96639
1011	WBGene00000726	0.965264
1012	WBGene00021743	0.965001
1013	WBGene00022258	0.964943
1014	WBGene00015969	0.964589
1015	WBGene00018036	0.963889
1016	WBGene00011447	0.963689
1017	WBGene00021611	0.963548
1018	WBGene00017327	0.961655
1019	WBGene00018465	0.960836
1020	WBGene00002041	0.959443
1021	WBGene00016544	0.958628
1022	WBGene00021897	0.958316
1023	WBGene00003553	0.958207
1024	WBGene00003720	0.95812
1025	WBGene00019659	0.957961
1026	WBGene00004174	0.956573
1027	WBGene00010421	0.956465
1028	WBGene00016218	0.956252
1029	WBGene00012622	0.956036
1030	WBGene00007487	0.955513
1031	WBGene00019741	0.955424
1032	WBGene00017092	0.954465
1033	WBGene00011388	0.953441
1034	WBGene00001555	0.952212
1035	WBGene00009649	0.951976
1036	WBGene00004809	0.951966
1037	WBGene00017947	0.951962
1038	WBGene00044272	0.95054
1039	WBGene00008246	0.950294
1040	WBGene00008980	0.950112
1041	WBGene00018113	0.950053
1042	WBGene00001671	0.949859
1043	WBGene00017302	0.949823
1044	WBGene00206388	0.94916
1045	WBGene00001445	0.948528
1046	WBGene00001452	0.948147
1047	WBGene00003514	0.946702
1048	WBGene00001448	0.946659
1049	WBGene00017448	0.946051
1050	WBGene00018470	0.945184
1051	WBGene00016757	0.944915
1052	WBGene00017449	0.944438
1053	WBGene00013358	0.94342
1054	WBGene00003847	0.943189
1055	WBGene00002015	0.943051
1056	WBGene00022571	0.942531
1057	WBGene00004987	0.942038
1058	WBGene00007548	0.941602
1059	WBGene00016734	0.94119
1060	WBGene00006965	0.940531
1061	WBGene00269434	0.939176
1062	WBGene00007863	0.939115
1063	WBGene00020224	0.938019
1064	WBGene00219376	0.937781
1065	WBGene00002017	0.936671
1066	WBGene00016215	0.936214
1067	WBGene00006913	0.934626
1068	WBGene00013103	0.934581
1069	WBGene00045177	0.933822
1070	WBGene00010446	0.933742
1071	WBGene00011616	0.933393
1072	WBGene00012226	0.933217
1073	WBGene00012202	0.932798
1074	WBGene00019017	0.932698
1075	WBGene00021046	0.932224
1076	WBGene00016769	0.931508
1077	WBGene00019073	0.931081
1078	WBGene00008590	0.930294
1079	WBGene00195169	0.930202
1080	WBGene00013947	0.92989
1081	WBGene00269355	0.929396
1082	WBGene00022813	0.929384
1083	WBGene00012513	0.92922
1084	WBGene00011805	0.928954
1085	WBGene00022419	0.928418
1086	WBGene00010495	0.928122
1087	WBGene00012531	0.927789
1088	WBGene00019048	0.927552
1089	WBGene00020450	0.927082
1090	WBGene00021437	0.926317
1091	WBGene00020456	0.924058
1092	WBGene00001887	0.923858
1093	WBGene00000678	0.923774
1094	WBGene00016034	0.923225
1095	WBGene00006774	0.922933
1096	WBGene00015580	0.922787
1097	WBGene00008541	0.922758
1098	WBGene00014088	0.92251
1099	WBGene00001250	0.922359
1100	WBGene00001717	0.922318
1101	WBGene00007060	0.922017
1102	WBGene00195185	0.921385
1103	WBGene00020692	0.921151
1104	WBGene00020947	0.921015
1105	WBGene00044347	0.92096
1106	WBGene00003877	0.920778
1107	WBGene00000652	0.920743
1108	WBGene00004989	0.919922
1109	WBGene00009843	0.919255
1110	WBGene00007919	0.919132
1111	WBGene00044811	0.916946
1112	WBGene00012702	0.915775
1113	WBGene00003585	0.915002
1114	WBGene00020139	0.914534
1115	WBGene00008546	0.914301
1116	WBGene00000981	0.91369
1117	WBGene00008254	0.913244
1118	WBGene00010587	0.913221
1119	WBGene00012407	0.913214
1120	WBGene00008205	0.913192
1121	WBGene00008320	0.912936
1122	WBGene00011252	0.912226
1123	WBGene00013906	0.912086
1124	WBGene00008089	0.912072
1125	WBGene00019742	0.911623
1126	WBGene00045468	0.910797
1127	WBGene00015197	0.910656
1128	WBGene00001647	0.909803
1129	WBGene00006919	0.909297
1130	WBGene00018242	0.908302
1131	WBGene00012462	0.908287
1132	WBGene00001311	0.908249
1133	WBGene00018560	0.908003
1134	WBGene00018265	0.907947
1135	WBGene00045292	0.907414
1136	WBGene00045255	0.906446
1137	WBGene00045386	0.904665
1138	WBGene00008255	0.904312
1139	WBGene00219207	0.902603
1140	WBGene00020049	0.902577
1141	WBGene00003748	0.901559
1142	WBGene00206528	0.90077
1143	WBGene00044903	0.900399
1144	WBGene00001459	0.899738
1145	WBGene00000693	0.897195
1146	WBGene00015352	0.896739
1147	WBGene00020870	0.896683
1148	WBGene00015753	0.896482
1149	WBGene00000602	0.895567
1150	WBGene00011293	0.894904
1151	WBGene00010290	0.894148
1152	WBGene00011478	0.893242
1153	WBGene00001440	0.892996
1154	WBGene00017123	0.891879
1155	WBGene00018200	0.891557
1156	WBGene00044205	0.89105
1157	WBGene00003907	0.890331
1158	WBGene00007076	0.889945
1159	WBGene00017756	0.888498
1160	WBGene00010377	0.887841
1161	WBGene00018130	0.887723
1162	WBGene00009973	0.886722
1163	WBGene00010524	0.886596
1164	WBGene00007730	0.886518
1165	WBGene00011556	0.886219
1166	WBGene00000219	0.886184
1167	WBGene00022353	0.883477
1168	WBGene00010266	0.882923
1169	WBGene00002067	0.881712
1170	WBGene00022061	0.881513
1171	WBGene00015408	0.880754
1172	WBGene00001458	0.880693
1173	WBGene00008655	0.879935
1174	WBGene00013962	0.87961
1175	WBGene00009042	0.87931
1176	WBGene00004058	0.878796
1177	WBGene00020353	0.878089
1178	WBGene00016738	0.876906
1179	WBGene00044178	0.875554
1180	WBGene00012440	0.87483
1181	WBGene00018278	0.873724
1182	WBGene00010175	0.872592
1183	WBGene00010514	0.872498
1184	WBGene00002112	0.871885
1185	WBGene00019273	0.871012
1186	WBGene00009562	0.870621
1187	WBGene00003385	0.870559
1188	WBGene00015369	0.869562
1189	WBGene00011718	0.869339
1190	WBGene00008137	0.869138
1191	WBGene00194649	0.868573
1192	WBGene00020453	0.86827
1193	WBGene00003687	0.866061
1194	WBGene00018258	0.865541
1195	WBGene00008803	0.864875
1196	WBGene00004933	0.864724
1197	WBGene00006464	0.864572
1198	WBGene00007634	0.863147
1199	WBGene00195070	0.863012
1200	WBGene00008334	0.862955
1201	WBGene00021603	0.862696
1202	WBGene00009028	0.86259
1203	WBGene00001710	0.861918
1204	WBGene00013896	0.861463
1205	WBGene00013403	0.861235
1206	WBGene00007717	0.861201
1207	WBGene00001987	0.861099
1208	WBGene00020051	0.860837
1209	WBGene00009054	0.8608
1210	WBGene00000012	0.860794
1211	WBGene00003567	0.859854
1212	WBGene00011076	0.858475
1213	WBGene00018955	0.857854
1214	WBGene00019064	0.857762
1215	WBGene00010012	0.857199
1216	WBGene00016909	0.856856
1217	WBGene00012911	0.856756
1218	WBGene00019132	0.856591
1219	WBGene00021094	0.856514
1220	WBGene00016795	0.85651
1221	WBGene00219423	0.856279
1222	WBGene00010870	0.855825
1223	WBGene00020433	0.855804
1224	WBGene00009577	0.855433
1225	WBGene00010225	0.854912
1226	WBGene00016265	0.853745
1227	WBGene00000088	0.852598
1228	WBGene00219372	0.85184
1229	WBGene00015527	0.851044
1230	WBGene00017015	0.851042
1231	WBGene00016237	0.850637
1232	WBGene00011611	0.849001
1233	WBGene00020448	0.848268
1234	WBGene00018701	0.84668
1235	WBGene00219288	0.846255
1236	WBGene00017594	0.846072
1237	WBGene00016009	0.845901
1238	WBGene00022178	0.845882
1239	WBGene00022538	0.845805
1240	WBGene00001136	0.845596
1241	WBGene00007599	0.845384
1242	WBGene00010018	0.84499
1243	WBGene00002065	0.844544
1244	WBGene00016003	0.844278
1245	WBGene00003370	0.844184
1246	WBGene00001444	0.843727
1247	WBGene00004944	0.84332
1248	WBGene00019623	0.842981
1249	WBGene00009867	0.842869
1250	WBGene00000819	0.842588
1251	WBGene00009509	0.84246
1252	WBGene00045475	0.842379
1253	WBGene00004359	0.842073
1254	WBGene00010989	0.841891
1255	WBGene00008521	0.841843
1256	WBGene00023423	0.841112
1257	WBGene00003707	0.841089
1258	WBGene00044536	0.841078
1259	WBGene00001843	0.840874
1260	WBGene00007219	0.840613
1261	WBGene00023408	0.84061
1262	WBGene00011727	0.840523
1263	WBGene00007779	0.840344
1264	WBGene00009182	0.83998
1265	WBGene00012421	0.839707
1266	WBGene00022608	0.839209
1267	WBGene00011314	0.839078
1268	WBGene00001780	0.838215
1269	WBGene00044609	0.837915
1270	WBGene00015632	0.837553
1271	WBGene00018851	0.837381
1272	WBGene00015582	0.837007
1273	WBGene00007558	0.836776
1274	WBGene00015897	0.836674
1275	WBGene00012554	0.836665
1276	WBGene00003429	0.835637
1277	WBGene00077764	0.835126
1278	WBGene00020618	0.835059
1279	WBGene00000899	0.835055
1280	WBGene00009158	0.835014
1281	WBGene00017690	0.834709
1282	WBGene00044007	0.834505
1283	WBGene00020340	0.834221
1284	WBGene00015887	0.834011
1285	WBGene00010856	0.833528
1286	WBGene00004423	0.833462
1287	WBGene00021457	0.833181
1288	WBGene00044156	0.833175
1289	WBGene00045511	0.833073
1290	WBGene00000007	0.832217
1291	WBGene00021333	0.830632
1292	WBGene00015713	0.830208
1293	WBGene00002128	0.830197
1294	WBGene00021472	0.830098
1295	WBGene00018485	0.829007
1296	WBGene00015431	0.828723
1297	WBGene00015015	0.827744
1298	WBGene00001189	0.827661
1299	WBGene00015948	0.827545
1300	WBGene00011476	0.827353
1301	WBGene00020895	0.827098
1302	WBGene00011436	0.826665
1303	WBGene00045183	0.825563
1304	WBGene00000214	0.824961
1305	WBGene00011059	0.824739
1306	WBGene00044025	0.824708
1307	WBGene00013073	0.824311
1308	WBGene00014159	0.824175
1309	WBGene00017153	0.824122
1310	WBGene00001413	0.823691
1311	WBGene00017442	0.823206
1312	WBGene00003175	0.823038
1313	WBGene00021322	0.821107
1314	WBGene00003375	0.819935
1315	WBGene00017785	0.819721
1316	WBGene00016181	0.819672
1317	WBGene00000653	0.819631
1318	WBGene00009259	0.819416
1319	WBGene00010001	0.818123
1320	WBGene00000553	0.818055
1321	WBGene00008221	0.817463
1322	WBGene00015042	0.817453
1323	WBGene00009533	0.817426
1324	WBGene00001581	0.817292
1325	WBGene00013195	0.816053
1326	WBGene00017398	0.815514
1327	WBGene00009531	0.815476
1328	WBGene00018261	0.815328
1329	WBGene00006618	0.81517
1330	WBGene00021452	0.814714
1331	WBGene00020285	0.814632
1332	WBGene00015354	0.814542
1333	WBGene00008900	0.814165
1334	WBGene00044637	0.813606
1335	WBGene00010667	0.813107
1336	WBGene00006459	0.813041
1337	WBGene00018100	0.812971
1338	WBGene00013388	0.812714
1339	WBGene00016648	0.812554
1340	WBGene00007753	0.812522
1341	WBGene00019777	0.811907
1342	WBGene00001450	0.811334
1343	WBGene00008200	0.811322
1344	WBGene00011353	0.810532
1345	WBGene00017867	0.810477
1346	WBGene00013874	0.810369
1347	WBGene00017678	0.810363
1348	WBGene00004182	0.810331
1349	WBGene00014028	0.807783
1350	WBGene00020418	0.807429
1351	WBGene00018189	0.807159
1352	WBGene00010039	0.806298
1353	WBGene00015954	0.805025
1354	WBGene00017054	0.804624
1355	WBGene00021247	0.803259
1356	WBGene00021500	0.803213
1357	WBGene00019435	0.803206
1358	WBGene00194835	0.801896
1359	WBGene00007695	0.801862
1360	WBGene00010655	0.801506
1361	WBGene00020149	0.801504
1362	WBGene00019456	0.800669
1363	WBGene00016801	0.799591
1364	WBGene00185092	0.799297
1365	WBGene00016896	0.799188
1366	WBGene00009331	0.799084
1367	WBGene00008570	0.798957
1368	WBGene00019734	0.797246
1369	WBGene00010422	0.796814
1370	WBGene00017983	0.796339
1371	WBGene00011522	0.796225
1372	WBGene00006983	0.795716
1373	WBGene00017180	0.795638
1374	WBGene00003689	0.795577
1375	WBGene00003517	0.795012
1376	WBGene00011973	0.794402
1377	WBGene00013560	0.794351
1378	WBGene00011012	0.793869
1379	WBGene00012718	0.793416
1380	WBGene00000951	0.793019
1381	WBGene00016647	0.79202
1382	WBGene00018065	0.791291
1383	WBGene00018174	0.791256
1384	WBGene00017568	0.791114
1385	WBGene00016958	0.79104
1386	WBGene00016756	0.790036
1387	WBGene00013284	0.789714
1388	WBGene00013968	0.789422
1389	WBGene00003033	0.789101
1390	WBGene00001724	0.789095
1391	WBGene00007404	0.789026
1392	WBGene00013895	0.789
1393	WBGene00044287	0.788975
1394	WBGene00004156	0.788926
1395	WBGene00006616	0.788727
1396	WBGene00003450	0.788474
1397	WBGene00000009	0.788315
1398	WBGene00022330	0.788237
1399	WBGene00003464	0.788126
1400	WBGene00013805	0.787963
1401	WBGene00016283	0.787605
1402	WBGene00003742	0.787375
1403	WBGene00000081	0.787173
1404	WBGene00004026	0.786501
1405	WBGene00012222	0.786114
1406	WBGene00045415	0.785798
1407	WBGene00018348	0.785404
1408	WBGene00016266	0.784787
1409	WBGene00000285	0.784609
1410	WBGene00018184	0.7846
1411	WBGene00015609	0.783505
1412	WBGene00021428	0.782987
1413	WBGene00007745	0.782917
1414	WBGene00009929	0.782772
1415	WBGene00015884	0.782751
1416	WBGene00044650	0.782475
1417	WBGene00006926	0.782349
1418	WBGene00018724	0.781084
1419	WBGene00007533	0.780011
1420	WBGene00044221	0.779778
1421	WBGene00019189	0.779477
1422	WBGene00009743	0.778496
1423	WBGene00006721	0.776622
1424	WBGene00008886	0.776561
1425	WBGene00013978	0.776469
1426	WBGene00013970	0.776437
1427	WBGene00001751	0.775879
1428	WBGene00016010	0.775275
1429	WBGene00008226	0.775146
1430	WBGene00003552	0.775059
1431	WBGene00194641	0.774461
1432	WBGene00009798	0.774138
1433	WBGene00001649	0.773318
1434	WBGene00004267	0.771878
1435	WBGene00045056	0.771396
1436	WBGene00000267	0.770536
1437	WBGene00011002	0.770389
1438	WBGene00010796	0.769974
1439	WBGene00016221	0.769887
1440	WBGene00022175	0.769881
1441	WBGene00020579	0.769543
1442	WBGene00008588	0.76935
1443	WBGene00008554	0.76828
1444	WBGene00019332	0.768137
1445	WBGene00017022	0.767918
1446	WBGene00007664	0.767467
1447	WBGene00007911	0.767113
1448	WBGene00007357	0.767095
1449	WBGene00004993	0.766798
1450	WBGene00003554	0.766333
1451	WBGene00012431	0.765401
1452	WBGene00003541	0.764794
1453	WBGene00010361	0.764456
1454	WBGene00003643	0.764333
1455	WBGene00008198	0.763288
1456	WBGene00008224	0.762964
1457	WBGene00007957	0.762905
1458	WBGene00022575	0.762218
1459	WBGene00022344	0.761881
1460	WBGene00000630	0.761532
1461	WBGene00017950	0.761435
1462	WBGene00044761	0.76133
1463	WBGene00008856	0.761286
1464	WBGene00011040	0.761103
1465	WBGene00016677	0.76037
1466	WBGene00002234	0.760124
1467	WBGene00044898	0.760059
1468	WBGene00012782	0.760019
1469	WBGene00017126	0.759897
1470	WBGene00016499	0.759295
1471	WBGene00011910	0.758817
1472	WBGene00003233	0.758597
1473	WBGene00044079	0.758537
1474	WBGene00020086	0.758489
1475	WBGene00006911	0.757117
1476	WBGene00194815	0.756985
1477	WBGene00002063	0.756955
1478	WBGene00010385	0.756682
1479	WBGene00007417	0.756667
1480	WBGene00009044	0.75583
1481	WBGene00020566	0.755792
1482	WBGene00044020	0.755615
1483	WBGene00019564	0.75521
1484	WBGene00194687	0.754466
1485	WBGene00019200	0.753676
1486	WBGene00016939	0.751972
1487	WBGene00001389	0.751798
1488	WBGene00015047	0.751717
1489	WBGene00013716	0.751571
1490	WBGene00004949	0.751011
1491	WBGene00021123	0.749945
1492	WBGene00019663	0.749933
1493	WBGene00022158	0.749356
1494	WBGene00008147	0.749011
1495	WBGene00021121	0.74844
1496	WBGene00015087	0.747989
1497	WBGene00008091	0.747775
1498	WBGene00015236	0.747769
1499	WBGene00016717	0.747565
1500	WBGene00016783	0.747505
1501	WBGene00016789	0.74684
1502	WBGene00007812	0.74641
1503	WBGene00005021	0.746134
1504	WBGene00018468	0.745548
1505	WBGene00010755	0.745503
1506	WBGene00008317	0.74502
1507	WBGene00011821	0.744814
1508	WBGene00003564	0.744545
1509	WBGene00002039	0.74387
1510	WBGene00017612	0.743697
1511	WBGene00015693	0.743531
1512	WBGene00021154	0.743288
1513	WBGene00016281	0.742656
1514	WBGene00015107	0.742506
1515	WBGene00016920	0.742459
1516	WBGene00009023	0.74142
1517	WBGene00022276	0.741336
1518	WBGene00021137	0.740591
1519	WBGene00018311	0.740263
1520	WBGene00006742	0.740036
1521	WBGene00007103	0.739815
1522	WBGene00015390	0.739812
1523	WBGene00012191	0.739599
1524	WBGene00016608	0.739487
1525	WBGene00011893	0.738692
1526	WBGene00022721	0.738551
1527	WBGene00022584	0.738543
1528	WBGene00005001	0.738246
1529	WBGene00001494	0.738204
1530	WBGene00010043	0.737622
1531	WBGene00000116	0.737348
1532	WBGene00021950	0.737343
1533	WBGene00008432	0.737293
1534	WBGene00044289	0.737291
1535	WBGene00018931	0.737262
1536	WBGene00003607	0.737056
1537	WBGene00020797	0.736921
1538	WBGene00013348	0.736854
1539	WBGene00019324	0.736785
1540	WBGene00016425	0.736468
1541	WBGene00007254	0.736226
1542	WBGene00019863	0.736075
1543	WBGene00021983	0.735831
1544	WBGene00017289	0.734995
1545	WBGene00017226	0.734923
1546	WBGene00000110	0.734764
1547	WBGene00012866	0.734571
1548	WBGene00000599	0.734474
1549	WBGene00010842	0.734371
1550	WBGene00016975	0.734329
1551	WBGene00018411	0.733715
1552	WBGene00016609	0.733476
1553	WBGene00016733	0.733443
1554	WBGene00012146	0.732729
1555	WBGene00007928	0.732695
1556	WBGene00003006	0.732574
1557	WBGene00016150	0.732472
1558	WBGene00007282	0.732266
1559	WBGene00004789	0.732045
1560	WBGene00016659	0.731513
1561	WBGene00005718	0.731267
1562	WBGene00010070	0.731129
1563	WBGene00009155	0.730744
1564	WBGene00009673	0.729652
1565	WBGene00017390	0.728769
1566	WBGene00004037	0.728468
1567	WBGene00007925	0.728368
1568	WBGene00008199	0.728331
1569	WBGene00020018	0.728006
1570	WBGene00021358	0.727575
1571	WBGene00003685	0.727505
1572	WBGene00001631	0.727427
1573	WBGene00020854	0.727285
1574	WBGene00022698	0.72683
1575	WBGene00007720	0.726399
1576	WBGene00017418	0.72627
1577	WBGene00044736	0.724874
1578	WBGene00022396	0.724766
1579	WBGene00019012	0.724277
1580	WBGene00001702	0.723395
1581	WBGene00011713	0.722814
1582	WBGene00015592	0.722434
1583	WBGene00003692	0.722115
1584	WBGene00021089	0.721668
1585	WBGene00010073	0.721127
1586	WBGene00000740	0.720224
1587	WBGene00016451	0.719633
1588	WBGene00020989	0.719096
1589	WBGene00017597	0.71835
1590	WBGene00008395	0.718184
1591	WBGene00006678	0.718166
1592	WBGene00269433	0.718141
1593	WBGene00022455	0.717939
1594	WBGene00185118	0.717742
1595	WBGene00013955	0.717711
1596	WBGene00009638	0.717494
1597	WBGene00003171	0.71716
1598	WBGene00043982	0.717155
1599	WBGene00003404	0.716955
1600	WBGene00020838	0.716626
1601	WBGene00015402	0.716101
1602	WBGene00016360	0.715353
1603	WBGene00007126	0.715349
1604	WBGene00006672	0.715171
1605	WBGene00007449	0.715164
1606	WBGene00011512	0.714525
1607	WBGene00001624	0.714492
1608	WBGene00206497	0.71434
1609	WBGene00007398	0.714195
1610	WBGene00014220	0.713658
1611	WBGene00007440	0.712742
1612	WBGene00006681	0.712489
1613	WBGene00020386	0.712078
1614	WBGene00003773	0.712026
1615	WBGene00008604	0.711706
1616	WBGene00008482	0.711561
1617	WBGene00013382	0.711539
1618	WBGene00017868	0.711069
1619	WBGene00022261	0.711021
1620	WBGene00020283	0.710563
1621	WBGene00018958	0.710296
1622	WBGene00045275	0.709721
1623	WBGene00011100	0.709309
1624	WBGene00010155	0.709151
1625	WBGene00015937	0.709103
1626	WBGene00012131	0.709035
1627	WBGene00011093	0.708911
1628	WBGene00021678	0.708773
1629	WBGene00008644	0.708374
1630	WBGene00011826	0.708219
1631	WBGene00019743	0.708133
1632	WBGene00015055	0.707935
1633	WBGene00006780	0.707541
1634	WBGene00021834	0.706552
1635	WBGene00219317	0.706462
1636	WBGene00011913	0.705956
1637	WBGene00007546	0.705938
1638	WBGene00011236	0.705399
1639	WBGene00017841	0.705128
1640	WBGene00011931	0.705027
1641	WBGene00002348	0.704822
1642	WBGene00012169	0.704603
1643	WBGene00012363	0.70328
1644	WBGene00000910	0.702989
1645	WBGene00021098	0.702529
1646	WBGene00016258	0.702224
1647	WBGene00016184	0.701949
1648	WBGene00003749	0.701787
1649	WBGene00011042	0.7015
1650	WBGene00003569	0.7011
1651	WBGene00016841	0.701066
1652	WBGene00008794	0.701052
1653	WBGene00016246	0.701051
1654	WBGene00022108	0.700641
1655	WBGene00003611	0.700598
1656	WBGene00007129	0.700398
1657	WBGene00018314	0.699982
1658	WBGene00022766	0.69949
1659	WBGene00003468	0.699399
1660	WBGene00012164	0.699193
1661	WBGene00019687	0.698976
1662	WBGene00006538	0.698754
1663	WBGene00045392	0.697958
1664	WBGene00017747	0.697542
1665	WBGene00011004	0.697134
1666	WBGene00010686	0.696806
1667	WBGene00003648	0.696307
1668	WBGene00009116	0.695888
1669	WBGene00086557	0.695767
1670	WBGene00016292	0.69571
1671	WBGene00013568	0.695116
1672	WBGene00011241	0.695095
1673	WBGene00043068	0.694935
1674	WBGene00044510	0.694772
1675	WBGene00018221	0.694547
1676	WBGene00010640	0.694434
1677	WBGene00007173	0.694402
1678	WBGene00017312	0.693948
1679	WBGene00016863	0.693929
1680	WBGene00008204	0.693553
1681	WBGene00000478	0.693261
1682	WBGene00016397	0.69317
1683	WBGene00000493	0.693085
1684	WBGene00018648	0.693069
1685	WBGene00003691	0.69274
1686	WBGene00013891	0.692258
1687	WBGene00019769	0.692211
1688	WBGene00003990	0.691826
1689	WBGene00012196	0.69002
1690	WBGene00016883	0.689603
1691	WBGene00011725	0.689251
1692	WBGene00014965	0.689191
1693	WBGene00006914	0.688407
1694	WBGene00016565	0.687966
1695	WBGene00004010	0.687886
1696	WBGene00009839	0.687699
1697	WBGene00001157	0.68742
1698	WBGene00020893	0.686873
1699	WBGene00001551	0.68681
1700	WBGene00050914	0.686805
1701	WBGene00012814	0.686316
1702	WBGene00003958	0.686033
1703	WBGene00012476	0.685987
1704	WBGene00016703	0.68582
1705	WBGene00010374	0.685237
1706	WBGene00020153	0.68513
1707	WBGene00003741	0.684755
1708	WBGene00016870	0.684581
1709	WBGene00044667	0.684439
1710	WBGene00013976	0.68395
1711	WBGene00014261	0.683791
1712	WBGene00044207	0.68367
1713	WBGene00016199	0.683144
1714	WBGene00018360	0.682967
1715	WBGene00013953	0.682617
1716	WBGene00022391	0.682389
1717	WBGene00003843	0.682142
1718	WBGene00007778	0.681774
1719	WBGene00015407	0.681722
1720	WBGene00018073	0.681423
1721	WBGene00018297	0.681063
1722	WBGene00003813	0.680934
1723	WBGene00006749	0.68084
1724	WBGene00013354	0.680521
1725	WBGene00018435	0.68039
1726	WBGene00019496	0.68035
1727	WBGene00002132	0.679729
1728	WBGene00007516	0.679575
1729	WBGene00011278	0.679572
1730	WBGene00010768	0.679196
1731	WBGene00001878	0.679194
1732	WBGene00008529	0.678675
1733	WBGene00020852	0.67822
1734	WBGene00010784	0.677105
1735	WBGene00000958	0.677059
1736	WBGene00010470	0.676897
1737	WBGene00002222	0.67676
1738	WBGene00000841	0.675744
1739	WBGene00020212	0.675625
1740	WBGene00013897	0.675442
1741	WBGene00017164	0.675034
1742	WBGene00013025	0.674638
1743	WBGene00002299	0.674546
1744	WBGene00022382	0.674483
1745	WBGene00003986	0.673504
1746	WBGene00017574	0.673459
1747	WBGene00044080	0.673442
1748	WBGene00022544	0.672935
1749	WBGene00016570	0.672821
1750	WBGene00016521	0.672688
1751	WBGene00016378	0.672615
1752	WBGene00022314	0.672454
1753	WBGene00007589	0.672374
1754	WBGene00021589	0.672305
1755	WBGene00016762	0.672267
1756	WBGene00001791	0.672238
1757	WBGene00012753	0.672216
1758	WBGene00017076	0.671881
1759	WBGene00007036	0.67184
1760	WBGene00010757	0.671437
1761	WBGene00007760	0.671244
1762	WBGene00009943	0.671011
1763	WBGene00006106	0.670898
1764	WBGene00014001	0.670866
1765	WBGene00044423	0.670748
1766	WBGene00009190	0.670667
1767	WBGene00019320	0.670523
1768	WBGene00003166	0.670447
1769	WBGene00009408	0.670215
1770	WBGene00021994	0.670021
1771	WBGene00012293	0.669697
1772	WBGene00044665	0.669608
1773	WBGene00000685	0.669324
1774	WBGene00015554	0.668745
1775	WBGene00018930	0.668611
1776	WBGene00021635	0.668603
1777	WBGene00009522	0.668416
1778	WBGene00013327	0.668405
1779	WBGene00016788	0.668285
1780	WBGene00010197	0.667766
1781	WBGene00044686	0.667738
1782	WBGene00006946	0.667738
1783	WBGene00077762	0.667591
1784	WBGene00017176	0.667585
1785	WBGene00011846	0.667138
1786	WBGene00015351	0.667054
1787	WBGene00008010	0.666985
1788	WBGene00020528	0.666676
1789	WBGene00017441	0.666658
1790	WBGene00017250	0.66656
1791	WBGene00022260	0.666413
1792	WBGene00050943	0.666086
1793	WBGene00022219	0.666049
1794	WBGene00010109	0.665704
1795	WBGene00007914	0.66564
1796	WBGene00019394	0.665522
1797	WBGene00003029	0.665295
1798	WBGene00008831	0.665162
1799	WBGene00014118	0.664449
1800	WBGene00022705	0.664285
1801	WBGene00016895	0.664235
1802	WBGene00020985	0.664208
1803	WBGene00001811	0.664199
1804	WBGene00017487	0.663965
1805	WBGene00010456	0.66371
1806	WBGene00020183	0.663691
1807	WBGene00017625	0.663539
1808	WBGene00003620	0.663516
1809	WBGene00009480	0.663173
1810	WBGene00194674	0.663028
1811	WBGene00003234	0.662537
1812	WBGene00000583	0.662345
1813	WBGene00022789	0.661863
1814	WBGene00002200	0.661507
1815	WBGene00010525	0.661334
1816	WBGene00000757	0.661066
1817	WBGene00006787	0.660555
1818	WBGene00018952	0.660505
1819	WBGene00003649	0.660491
1820	WBGene00043983	0.660185
1821	WBGene00016095	0.660047
1822	WBGene00020401	0.65984
1823	WBGene00001617	0.659433
1824	WBGene00006684	0.659294
1825	WBGene00235332	0.658964
1826	WBGene00017246	0.658485
1827	WBGene00021975	0.65842
1828	WBGene00018672	0.658143
1829	WBGene00011214	0.657974
1830	WBGene00011180	0.657929
1831	WBGene00010516	0.657389
1832	WBGene00003728	0.657339
1833	WBGene00021758	0.6573
1834	WBGene00014074	0.657169
1835	WBGene00007685	0.656909
1836	WBGene00006798	0.656593
1837	WBGene00010221	0.656463
1838	WBGene00011272	0.656247
1839	WBGene00010735	0.655634
1840	WBGene00009623	0.655128
1841	WBGene00019963	0.654875
1842	WBGene00001736	0.654754
1843	WBGene00021260	0.654726
1844	WBGene00004007	0.65445
1845	WBGene00017777	0.654438
1846	WBGene00006438	0.653834
1847	WBGene00019817	0.65368
1848	WBGene00006917	0.653654
1849	WBGene00020594	0.652229
1850	WBGene00013838	0.65201
1851	WBGene00003089	0.651467
1852	WBGene00044661	0.651255
1853	WBGene00001392	0.650909
1854	WBGene00016456	0.650747
1855	WBGene00014256	0.649574
1856	WBGene00010972	0.648219
1857	WBGene00219274	0.648199
1858	WBGene00015537	0.648097
1859	WBGene00013726	0.647592
1860	WBGene00010383	0.647347
1861	WBGene00000035	0.647265
1862	WBGene00017437	0.647164
1863	WBGene00016247	0.645888
1864	WBGene00002100	0.645683
1865	WBGene00044233	0.645014
1866	WBGene00044675	0.644834
1867	WBGene00022685	0.644526
1868	WBGene00004889	0.644431
1869	WBGene00013255	0.644154
1870	WBGene00020296	0.643121
1871	WBGene00002184	0.642126
1872	WBGene00011218	0.641884
1873	WBGene00008370	0.641625
1874	WBGene00003698	0.641367
1875	WBGene00014092	0.641254
1876	WBGene00004876	0.641183
1877	WBGene00010947	0.640756
1878	WBGene00016395	0.640556
1879	WBGene00021939	0.640493
1880	WBGene00022125	0.639998
1881	WBGene00008610	0.639867
1882	WBGene00018005	0.639593
1883	WBGene00021732	0.639403
1884	WBGene00000991	0.639073
1885	WBGene00007397	0.638384
1886	WBGene00009231	0.638304
1887	WBGene00022859	0.638263
1888	WBGene00006792	0.638208
1889	WBGene00007675	0.638165
1890	WBGene00009442	0.637391
1891	WBGene00016661	0.637259
1892	WBGene00021463	0.637123
1893	WBGene00001590	0.637034
1894	WBGene00016511	0.636968
1895	WBGene00020786	0.636938
1896	WBGene00016116	0.636828
1897	WBGene00017434	0.636707
1898	WBGene00000221	0.636069
1899	WBGene00014099	0.635715
1900	WBGene00004046	0.635614
1901	WBGene00008677	0.635163
1902	WBGene00011384	0.6351
1903	WBGene00000822	0.634927
1904	WBGene00206386	0.634581
1905	WBGene00045517	0.634532
1906	WBGene00018848	0.634444
1907	WBGene00019643	0.63431
1908	WBGene00015545	0.634099
1909	WBGene00021516	0.633941
1910	WBGene00020155	0.633826
1911	WBGene00008316	0.633072
1912	WBGene00003850	0.632792
1913	WBGene00010269	0.632081
1914	WBGene00018694	0.631704
1915	WBGene00018871	0.631602
1916	WBGene00013226	0.631222
1917	WBGene00014008	0.631128
1918	WBGene00014076	0.631123
1919	WBGene00006628	0.631118
1920	WBGene00017290	0.630606
1921	WBGene00007138	0.630387
1922	WBGene00009370	0.630292
1923	WBGene00044649	0.630115
1924	WBGene00014233	0.629899
1925	WBGene00007257	0.629429
1926	WBGene00020693	0.629425
1927	WBGene00077697	0.629425
1928	WBGene00011090	0.628655
1929	WBGene00019165	0.628332
1930	WBGene00003526	0.627965
1931	WBGene00010034	0.627643
1932	WBGene00011473	0.627306
1933	WBGene00016559	0.626399
1934	WBGene00016093	0.626348
1935	WBGene00020912	0.626197
1936	WBGene00003546	0.625906
1937	WBGene00003179	0.625837
1938	WBGene00021614	0.625633
1939	WBGene00018831	0.625625
1940	WBGene00011397	0.625433
1941	WBGene00003688	0.625359
1942	WBGene00003540	0.62504
1943	WBGene00022431	0.624971
1944	WBGene00018150	0.624638
1945	WBGene00010148	0.623698
1946	WBGene00003650	0.623449
1947	WBGene00001788	0.622548
1948	WBGene00022771	0.622374
1949	WBGene00020324	0.622317
1950	WBGene00011351	0.622192
1951	WBGene00045215	0.621428
1952	WBGene00012224	0.62049
1953	WBGene00020248	0.620086
1954	WBGene00021544	0.620023
1955	WBGene00012781	0.619918
1956	WBGene00013809	0.619399
1957	WBGene00003960	0.619301
1958	WBGene00009403	0.619065
1959	WBGene00007837	0.618832
1960	WBGene00007565	0.618226
1961	WBGene00012374	0.618144
1962	WBGene00006635	0.617844
1963	WBGene00018262	0.617545
1964	WBGene00016325	0.617526
1965	WBGene00044019	0.617448
1966	WBGene00001941	0.61743
1967	WBGene00003735	0.617264
1968	WBGene00003371	0.617142
1969	WBGene00001672	0.616911
1970	WBGene00013330	0.616906
1971	WBGene00000264	0.616855
1972	WBGene00006652	0.616721
1973	WBGene00010606	0.61669
1974	WBGene00019590	0.616534
1975	WBGene00009816	0.615902
1976	WBGene00001188	0.615671
1977	WBGene00189949	0.615671
1978	WBGene00009896	0.615436
1979	WBGene00044444	0.615236
1980	WBGene00206413	0.614798
1981	WBGene00194692	0.614499
1982	WBGene00007503	0.614461
1983	WBGene00000711	0.614301
1984	WBGene00015549	0.614294
1985	WBGene00010772	0.614223
1986	WBGene00003613	0.613826
1987	WBGene00018885	0.613819
1988	WBGene00001796	0.613692
1989	WBGene00003759	0.613588
1990	WBGene00010951	0.61345
1991	WBGene00019205	0.613181
1992	WBGene00017077	0.612957
1993	WBGene00001172	0.612943
1994	WBGene00011941	0.612846
1995	WBGene00001773	0.612782
1996	WBGene00006053	0.612562
1997	WBGene00008354	0.611877
[truncated: 11,332 more rows]
