# Supplementary material for: Bacterial diet affects the age-dependent decline of associative learning in Caenorhabditis elegans
Source: eLife. 2023 May 30;12:e81418. doi: 10.7554/eLife.81418 (PMC10229132; doi:10.7554/eLife.81418)
Supplement: Figure 9—source data 1. [file elife-81418-fig9-data1.xlsx]

## Sheet: Sheet1
Source data for Figure 9C
Strain	Condition	Performance index
N2	wt_D1	0.204545
N2	wt_D1	0.24
N2	wt_D1	0.416667
N2	wt_D1	0.42439
N2	wt_D1	0.342105
N2	wt_D1	0.46875
N2	wt_D1	0.261719
N2	wt_D1	0.751938
N2	wt_D1	0.533981
N2	wt_D1	0.451613
N2	wt_D1	0.326316
N2	wt_D1	0.653333
N2	wt_D1	0.511111
N2	wt_D1	0.326316
N2	wt_D1	0.714286
N2	wt_D1	0.97561
N2	wt_D1	0.807692
N2	wt_D1	0.859504
N2	wt_D1	0.760638
N2	wt_D1	0.821622
N2	wt_D1	0.948052
N2	wt_D1	0.931034
N2	wt_D1	0.894472
N2	wt_D1	0.824242
N2	wt_D1	0.967391
N2	wt_D1	0.798165
N2	wt_D1	0.87
N2	wt_D1	0.87
N2	wt_D1	0.74
N2	wt_D1	0.85
N2	wt_D1	0.77
N2	wt_D1	0.8
N2	wt_D1	0.68
N2	wt_D1	0.5
N2	wt_D1	0.63
N2	wt_D1	0.43
N2	wt_D1	0.86
N2	wt_D1	0.66
N2	wt_D1	0.59
N2	wt_D1	0.79
N2	wt_D1	0.68
N2	wt_D1	0.9
N2	wt_D1	0.81
N2	wt_D1	0.8
N2	wt_D1	0.76
N2	wt_D5_E.coli	0.590062
N2	wt_D5_E.coli	0.666667
N2	wt_D5_E.coli	0.41
N2	wt_D5_E.coli	0.37
N2	wt_D5_E.coli	0.12
N2	wt_D5_E.coli	0.46
N2	wt_D5_E.coli	0.36
N2	wt_D5_E.coli	0.2
N2	wt_D5_E.coli	0.75
N2	wt_D5_E.coli	0.46
N2	wt_D5_E.coli	0.43
N2	wt_D5_E.coli	0.51
N2	wt_D5_E.coli	0.56
N2	wt_D5_E.coli	0.38
N2	wt_D5_E.coli	0.22
N2	wt_D5_E.coli	0.52
N2	wt_D5_E.coli	0.43
N2	wt_D5_E.coli	0.51
N2	wt_D5_E.coli	0.42
N2	wt_D5_Lb.reuteri	0.77
N2	wt_D5_Lb.reuteri	0.85
N2	wt_D5_Lb.reuteri	0.67
N2	wt_D5_Lb.reuteri	0.82
N2	wt_D5_Lb.reuteri	0.78
N2	wt_D5_Lb.reuteri	0.93
N2	wt_D5_Lb.reuteri	0.73
N2	wt_D5_Lb.reuteri	0.66
N2	wt_D5_Lb.reuteri	0.68
N2	wt_D5_Lb.reuteri	0.72
N2	wt_D5_Lb.reuteri	0.78
N2	wt_D5_Lb.reuteri	0.79
N2	wt_D5_Lb.reuteri	0.61
VC48	kpc_1_D1	0.0479042
VC48	kpc_1_D1	0.05
VC48	kpc_1_D1	0.0294118
VC48	kpc_1_D1	0.04
VC48	kpc_1_D1	0.442478
VC48	kpc_1_D1	0.05
VC48	kpc_1_D1	0.136364
VC48	kpc_1_D1	0.111111
VC48	kpc_1_D1	0.359375
VC48	kpc_1_D1	0.0225989
VC48	kpc_1_D1	0.26087
VC48	kpc_1_D1	0.151515
VC48	kpc_1_D1	0.0612245
VC48	kpc_1_D1	0.175
VC48	kpc_1_D1	0.421053
VC48	kpc_1_D1	0.17
VC48	kpc_1_D1	0.333333
VC48	kpc_1_D1	0.322034
VC48	kpc_1_D1	0.180556
VC48	kpc_1_D1	0.540984
VC48	kpc_1_D1	0.307692
VC48	kpc_1_D1	0.217105
VC48	kpc_1_D1	0.14
VC48	kpc_1_D1	0.32
VC48	kpc_1_D1	0.38
VC48	kpc_1_D1	0.31
VC48	kpc_1_D1	0.28
VC48	kpc_1_D1	0.22
VC48	kpc_1_D1	0.06
VC48	kpc_1_D1	0.25
VC48	kpc_1_D1	0.39
VC48	kpc_1_D1	0.29
VC48	kpc_1_D1	0.1
VC48	kpc_1_D1	0.14
VC48	kpc_1_D5_E.coli	0.38843
VC48	kpc_1_D5_E.coli	0.132353
VC48	kpc_1_D5_E.coli	0.18
VC48	kpc_1_D5_E.coli	0.12
VC48	kpc_1_D5_E.coli	0.12
VC48	kpc_1_D5_E.coli	0.53
VC48	kpc_1_D5_E.coli	0.08
VC48	kpc_1_D5_E.coli	0.08
VC48	kpc_1_D5_E.coli	0
VC48	kpc_1_D5_E.coli	0.02
VC48	kpc_1_D5_E.coli	0.07
VC48	kpc_1_D5_Lb.reuteri	0.35
VC48	kpc_1_D5_Lb.reuteri	0.23
VC48	kpc_1_D5_Lb.reuteri	0.04
VC48	kpc_1_D5_Lb.reuteri	0.07
VC48	kpc_1_D5_Lb.reuteri	0.07
VC48	kpc_1_D5_Lb.reuteri	0.02
VC48	kpc_1_D5_Lb.reuteri	0.09
VC48	kpc_1_D5_Lb.reuteri	0.04
VC48	kpc_1_D5_Lb.reuteri	0.08
VC671	egl_3_D1	0
VC671	egl_3_D1	0
VC671	egl_3_D1	0
VC671	egl_3_D1	0
VC671	egl_3_D1	0
VC671	egl_3_D1	0
VC671	egl_3_D1	0
VC671	egl_3_D1	0
VC671	egl_3_D1	0
VC671	egl_3_D1	0
VC671	egl_3_D1	0
VC671	egl_3_D1	0.0537634
VC671	egl_3_D1	0
VC671	egl_3_D1	0.5
VC671	egl_3_D1	0.0111111
VC671	egl_3_D1	0.166667
VC671	egl_3_D1	0
VC671	egl_3_D1	0.0204082
VC671	egl_3_D1	0
VC671	egl_3_D1	0.00704225
VC671	egl_3_D1	0.042735
VC671	egl_3_D1	0.0994764
VC671	egl_3_D1	0
VC671	egl_3_D1	0.0118343
VC671	egl_3_D1	0.02
VC671	egl_3_D1	0
VC671	egl_3_D1	0
VC671	egl_3_D1	0
VC671	egl_3_D1	0
VC671	egl_3_D1	0
VC671	egl_3_D1	0
VC671	egl_3_D5_E.coli	0.0285714
VC671	egl_3_D5_E.coli	0.00961539
VC671	egl_3_D5_E.coli	0.00813008
VC671	egl_3_D5_E.coli	0
VC671	egl_3_D5_E.coli	0.02
VC671	egl_3_D5_E.coli	0
VC671	egl_3_D5_E.coli	0
VC671	egl_3_D5_E.coli	0
VC671	egl_3_D5_E.coli	0
VC671	egl_3_D5_Lb.reuteri	0
VC671	egl_3_D5_Lb.reuteri	0.03
VC671	egl_3_D5_Lb.reuteri	0
VC671	egl_3_D5_Lb.reuteri	0
VC671	egl_3_D5_Lb.reuteri	0
VC671	egl_3_D5_Lb.reuteri	0.03
VC671	egl_3_D5_Lb.reuteri	0
JT23	aex_5_D1	0.478483
JT23	aex_5_D1	0.458065
JT23	aex_5_D1	0.57
JT23	aex_5_D1	0.57
JT23	aex_5_D1	0.552632
JT23	aex_5_D1	0.26087
JT23	aex_5_D1	0.0232558
JT23	aex_5_D1	0.263158
JT23	aex_5_D1	0.54023
JT23	aex_5_D1	0.171429
JT23	aex_5_D1	0.125
JT23	aex_5_D1	0
JT23	aex_5_D1	0.680851
JT23	aex_5_D1	0.0232558
JT23	aex_5_D1	0.333333
JT23	aex_5_D1	0.661765
JT23	aex_5_D1	0.588785
JT23	aex_5_D1	0.808511
JT23	aex_5_D1	0.865591
JT23	aex_5_D1	0.187919
JT23	aex_5_D1	0.354651
JT23	aex_5_D1	0.333333
JT23	aex_5_D1	0.829114
JT23	aex_5_D1	0.708029
JT23	aex_5_D1	0.584795
JT23	aex_5_D1	0.73125
JT23	aex_5_D1	0.64
JT23	aex_5_D1	0.35
JT23	aex_5_D1	0.23
JT23	aex_5_D1	0.39
JT23	aex_5_D1	0.37
JT23	aex_5_D1	0.31
JT23	aex_5_D1	0.29
JT23	aex_5_D1	0.46
JT23	aex_5_D1	0.301587
JT23	aex_5_D1	0.391892
JT23	aex_5_D1	0.572327
JT23	aex_5_D1	0.378947
JT23	aex_5_D1	0.731092
JT23	aex_5_D1	0.712871
JT23	aex_5_D1	0.911765
JT23	aex_5_D1	0.852713
JT23	aex_5_D1	0.857143
JT23	aex_5_D1	0.806452
JT23	aex_5_D1	0.60274
JT23	aex_5_D1	0.714286
JT23	aex_5_D5_E.coli	0.674641
JT23	aex_5_D5_E.coli	0.730769
JT23	aex_5_D5_E.coli	0.45
JT23	aex_5_D5_E.coli	0.37
JT23	aex_5_D5_E.coli	0.55
JT23	aex_5_D5_E.coli	0.12
JT23	aex_5_D5_E.coli	0.69
JT23	aex_5_D5_E.coli	0.65
JT23	aex_5_D5_E.coli	0.78
JT23	aex_5_D5_E.coli	0.72
JT23	aex_5_D5_E.coli	0.8
JT23	aex_5_D5_E.coli	0.82
JT23	aex_5_D5_E.coli	0.8
JT23	aex_5_D5_E.coli	0.82
JT23	aex_5_D5_E.coli	0.86
JT23	aex_5_D5_E.coli	0.659259
JT23	aex_5_D5_E.coli	0.723164
JT23	aex_5_D5_E.coli	0.666667
JT23	aex_5_D5_E.coli	0.642202
JT23	aex_5_D5_E.coli	0.71
JT23	aex_5_D5_Lb.reuteri	0.66
JT23	aex_5_D5_Lb.reuteri	0.53
JT23	aex_5_D5_Lb.reuteri	0.42
JT23	aex_5_D5_Lb.reuteri	0.41
JT23	aex_5_D5_Lb.reuteri	0.31
JT23	aex_5_D5_Lb.reuteri	0.71
JT23	aex_5_D5_Lb.reuteri	0.94
JT23	aex_5_D5_Lb.reuteri	0.6
JT23	aex_5_D5_Lb.reuteri	0.65
JT23	aex_5_D5_Lb.reuteri	0.84
JT23	aex_5_D5_Lb.reuteri	0.666667
JT23	aex_5_D5_Lb.reuteri	0.11811
JT23	aex_5_D5_Lb.reuteri	0.410853
JT23	aex_5_D5_Lb.reuteri	0.3
CB937	bli_4_D1	0.52
CB937	bli_4_D1	0.484429
CB937	bli_4_D1	0.04
CB937	bli_4_D1	0.41
CB937	bli_4_D1	0.434524
CB937	bli_4_D1	0.132075
CB937	bli_4_D1	0.252525
CB937	bli_4_D1	0.325203
CB937	bli_4_D1	0.382353
CB937	bli_4_D1	0.347368
CB937	bli_4_D1	0.0243902
CB937	bli_4_D1	0.6875
CB937	bli_4_D1	0.512821
CB937	bli_4_D1	0.393162
CB937	bli_4_D1	0.528302
CB937	bli_4_D1	0.246269
CB937	bli_4_D1	0.740385
CB937	bli_4_D1	0.765625
CB937	bli_4_D1	0.789474
CB937	bli_4_D1	0.752212
CB937	bli_4_D1	0.425
CB937	bli_4_D1	0.52459
CB937	bli_4_D1	0.744828
CB937	bli_4_D1	0.313953
CB937	bli_4_D1	0.542714
CB937	bli_4_D1	0.8
CB937	bli_4_D1	0.76
CB937	bli_4_D1	0.77
CB937	bli_4_D1	0.82
CB937	bli_4_D1	0.6
CB937	bli_4_D1	0.48
CB937	bli_4_D1	0.36
CB937	bli_4_D1	0.7
CB937	bli_4_D1	0.48
CB937	bli_4_D1	0.77
CB937	bli_4_D1	0.6
CB937	bli_4_D1	0.83
CB937	bli_4_D1	0.8
CB937	bli_4_D5_E.coli	0.493976
CB937	bli_4_D5_E.coli	0.476471
CB937	bli_4_D5_E.coli	0.56
CB937	bli_4_D5_E.coli	0.34
CB937	bli_4_D5_E.coli	0.49
CB937	bli_4_D5_E.coli	0.52
CB937	bli_4_D5_E.coli	0.26
CB937	bli_4_D5_E.coli	0.37
CB937	bli_4_D5_E.coli	0.09
CB937	bli_4_D5_E.coli	0.26
CB937	bli_4_D5_E.coli	0.34
CB937	bli_4_D5_E.coli	0.44
CB937	bli_4_D5_E.coli	0.5
CB937	bli_4_D5_E.coli	0.15
CB937	bli_4_D5_E.coli	0.22
CB937	bli_4_D5_E.coli	0.26
CB937	bli_4_D5_Lb.reuteri	0.74
CB937	bli_4_D5_Lb.reuteri	0.57
CB937	bli_4_D5_Lb.reuteri	0.67
CB937	bli_4_D5_Lb.reuteri	0.78
CB937	bli_4_D5_Lb.reuteri	0.67
CB937	bli_4_D5_Lb.reuteri	0.71
CB937	bli_4_D5_Lb.reuteri	0.79
CB937	bli_4_D5_Lb.reuteri	0.48
CB937	bli_4_D5_Lb.reuteri	0.56
CB937	bli_4_D5_Lb.reuteri	0.56
