# Supplementary material for: Bacterial diet affects the age-dependent decline of associative learning in Caenorhabditis elegans
Source: eLife. 2023 May 30;12:e81418. doi: 10.7554/eLife.81418 (PMC10229132; doi:10.7554/eLife.81418)
Supplement: Figure 9—source data 2. [file elife-81418-fig9-data2.xlsx]

## Sheet: Fig9D
Source data for Figure 9D
Homo Lactobacillus, E. coli > Hetero Lactobacillus
Gene	Description	Average FPKM		Ratio	p value	DAF-16 target
		Hetero LAB	Homo LAB, E. coli	(Hetero/Homo)
fipr-24	FIP (Fungus-Induced Protein) Related	0.929592	7.91856	0.117394	0.00635449
scl-12	SCP-Like extracellular protein	0.174565	1.04233	0.167475	0.0132472
fipr-23	FIP (Fungus-Induced Protein) Related	0.795866	4.43407	0.179489	0.00289666
fipr-22	FIP (Fungus-Induced Protein) Related	2.2099	12.0445	0.183478	0.00945232
F56D6.8	hypothetical protein	20.5099	109.865	0.186683	0.00705005
C37A5.3	hypothetical protein	1.26113	6.50162	0.193972	5.13989e-05
drd-10	dietary restriction down regulated	0.819191	4.19625	0.19522	0.0375877
dct-8	DAF-16/FOXO Controlled, germline Tumor affecting	18.8437	94.1162	0.200218	0.00465257
T01C3.11	hypothetical protein	0.940957	4.24204	0.221817	0.00392643
F56D6.9	hypothetical protein	15.8457	67.3207	0.235376	0.0146389
Hetero Lactobacillus > Homo Lactobacillus, E. coli
Gene	Description	Average FPKM		Ratio	p value	DAF-16 target
		Hetero LAB	Homo LAB, E. coli	(Hetero/Homo)
clec-125	C-type LECtin	0.455362	0.0746747	6.09794	0.0244261
lys-6	LYSozyme	10.4185	1.84574	5.64463	0.0202875
arrd-6	ARRestin Domain protein	0.278479	0.0577067	4.82578	0.000536594
lys-5	LYSozyme	12.5827	2.68227	4.69105	0.0277815
comt-2	Catechol-O-MethylTransferase family	3.14807	0.743062	4.23662	0.0267615
pho-13	intestinal acid PHOsphatase	4.10438	1.04968	3.91011	0.000370912
C06E1.7	Putative glycosyltransferase	0.419805	0.108054	3.88515	0.0481124
C54G6.3	hypothetical protein	0.226579	0.0607403	3.73029	0.0455732
npax-2	N-terminal PAX (PAI domain only) protein	0.312648	0.0900157	3.47326	0.0341723
F59A1.13	hypothetical protein	0.123809	0.0386303	3.20497	0.0010738
