# Supplementary material for: Bacterial diet affects the age-dependent decline of associative learning in Caenorhabditis elegans
Source: eLife. 2023 May 30;12:e81418. doi: 10.7554/eLife.81418 (PMC10229132; doi:10.7554/eLife.81418)
Supplement: Supplementary file 1. — (a) Lifespan statistics for Figure 1—figure supplement 1. (b) Lifespan statistics for Figure 4A. (c) Lifespan statistics for Figure 7C. [file elife-81418-supp1.xlsx]

## Sheet: Sup1a
Supplementary file 1a Lifespan statistics for Figure 1-figure supplement 1
Cultivation temperature	Median (days)	Statistical significance Log-rank (Mantel-Cox) test	Death	Censored
17C	22	vs 20C: ***p<0.001	83	17
		vs 23C: ***p<0.001
20C	18	vs 23C: ***p<0.001	92	8
23C	11		90	10

## Sheet: Sup1b
Supplementary file 1b Lifespan statistics for Figure 4A
Diet	Median (days)	Statistical significance Log-rank (Mantel-Cox) test	Death	Censored
E. coli (OP50)	14		83	17
P. pentosaceus	22	***p<0.001	55	45
E. coli (OP50)	15		87	13
Lb. reuteri	14	ns (p=0.6851)	58	42
E. coli (OP50)	14		84	16
Lb. plantarum	8	***p<0.001	52	48
E. coli (OP50)	14		83	17
Lb. rhamnosus	4	***p<0.001	52	48

## Sheet: Sup1c
Supplementary file 1c Lifespan statistics for Figure 7C
Condition	Median (days)	Statistical significance Log-rank (Mantel-Cox) test	Death	Censored
wt E. coli (OP50)	12	vs wt Lb. reuteri: *p<0.05	145	5
		vs daf-16 E. coli: ***p<0.001
wt Lb. reuteri	14	vs daf-16 Lb. reuteri: *p<0.05	108	42
daf-16 E. coli (OP50)	10	vs daf-16 Lb. reuteri: ***p<0.001	137	13
daf-16 Lb. reuteri	13		124	26
