# Supplementary material for: Bacterial diet affects the age-dependent decline of associative learning in Caenorhabditis elegans
Source: eLife. 2023 May 30;12:e81418. doi: 10.7554/eLife.81418 (PMC10229132; doi:10.7554/eLife.81418)
Supplement: Supplementary file 3. — (a) RNAseq data. (b) Top 5% genes positively contributing to PC1. (c) Top 5% genes negaitively contributing to PC1. (d) Gene ontology analysis of top 5% genes positively contributing to PC1. (e) Gene ontology analysis of top 5% genes negatively contributing to PC1. (f) Top 5% genes positively contributing to PC2. (g) Top 5% genes negatively contributing to PC2. (h) Gene ontology analysis of top 5% genes positively contributing to PC2. (i) Gene ontology analysis of top 5% genes negatively contributing to PC2. (j) Genes enriched in E. coli or Homo lactic acid bacteria (LAB)-fed D5. (k) Gene ontology analysis of E. coli or Homo LAB-enriched genes. (l) Genes enriched in Hetero LAB-fed D5. (m) Gene ontology analysis of Hetero LAB-enriched genes. [file elife-81418-supp3.xlsx]

## Sheet: Sup3a
Supplementary file 3a RNAseq data
Gene	WormBase_Gene_ID	Description	fold change compared to D5 E. coli							mean								Normalized								FPKM								Read
			D1	D5 Lb. reuteri	D5 P. pentosaceus	D5 Lb. gasseri	D5 Lb. plantarum	D5 Lb. rhamnosus	D5 Lb. delbrueckii	D1	D5 E. coli	D5 Lb. reuteri	D5 P. pentosaceus	D5 Lb. gasseri	D5 Lb. plantarum	D5 Lb. rhamnosus	D5 Lb. delbrueckii	D1	D5 E. coli	D5 Lb. reuteri	D5 P. pentosaceus	D5 Lb. gasseri	D5 Lb. plantarum	D5 Lb. rhamnosus	D5 Lb. delbrueckii	D1	D5 E. coli	D5 Lb. reuteri	D5 P. pentosaceus	D5 Lb. gasseri	D5 Lb. plantarum	D5 Lb. rhamnosus	D5 Lb. delbrueckii	D1	D5 E. coli	D5 Lb. reuteri	D5 P. pentosaceus	D5 Lb. gasseri	D5 Lb. plantarum	D5 Lb. rhamnosus	D5 Lb. delbrueckii
col-129	WBGene00000703	COLlagen	904.031	1.43168	1.24078	-1.00643	1.6998	1.00122	-1.16737	10.7428	0.922575	1.44029	1.23382	0.913322	1.68794	0.92434	0.699308	10.7428	0.922575	1.44029	1.23382	0.913322	1.68794	0.92434	0.699308	2570.19	0.802924	1.62048	1.25887	0.860291	1.89103	1.00536	0.538935	102411	37	76	51	45	77	31	20
col-81	WBGene00000657	COLlagen	511.133	-1.02937	-1.11053	-1.12593	-1.03613	-1.35038	1.05551	10.0969	1.09935	1.05759	0.94811	0.928239	1.04814	0.665985	1.17729	10.0969	1.09935	1.05759	0.94811	0.928239	1.04814	0.665985	1.17729	1579.21	1.02917	1.03273	0.8844	0.87931	0.911294	0.685124	1.10838	67532	45	52	39	42	40	23	44
col-139	WBGene00000712	COLlagen	393.202	-1.04726	-1.91209	-1.52241	-1.39333	-1.65951	-2.68672	10.4012	1.78211	1.71548	0.846954	1.17575	1.30357	1.05135	0.35626	10.4012	1.78211	1.71548	0.846954	1.17575	1.30357	1.05135	0.35626	1972.73	2.1605	2.17284	0.768498	1.24721	1.26003	1.18879	0.249699	85460	94	110	34	60	56	41	10
msp-51	WBGene00003444	Major sperm protein 19/31/40/45/50/51/53/59/61/65/81/113/142	234.896	1.0422	1.42267	1.05937	-1.18919	1.00863	-1.35158	8.36819	0.492312	0.551945	1.00091	0.575515	0.242335	0.504713	0.0576697	8.36819	0.492312	0.551945	1.00091	0.575515	0.242335	0.504713	0.0576697	362.288	0.35512	0.47142	0.946424	0.487107	0.165276	0.496828	0.03411	6460	7	10	17	10	3	7	1
msp-77	WBGene00003464	Major sperm protein 77/79	234.807	1.4136	1.00795	1.0073	1.00467	-1.02828	-1.10808	8.19242	0.317094	0.816463	0.32852	0.327584	0.323819	0.276857	0.169038	8.19242	0.317094	0.816463	0.32852	0.327584	0.323819	0.276857	0.169038	300.849	0.223895	0.743318	0.254151	0.267783	0.221958	0.257817	0.109423	5365	4	16	5	6	5	4	2
msp-57	WBGene00003450	Major sperm protein 55/57	229.817	-1.00552	1.14971	-1.10428	-1.10185	-1.0065	-1.39897	8.45836	0.614016	0.606073	0.815282	0.470904	0.474091	0.604672	0.129656	8.45836	0.614016	0.606073	0.815282	0.470904	0.474091	0.604672	0.129656	394.856	0.475039	0.525301	0.732456	0.394967	0.341684	0.614439	0.081865	7041	9	11	14	8	7	9	2
msp-56	WBGene00003449	Major sperm protein 10/36/56/76	224.738	1.18911	-1.01754	1.18202	-1.08492	-1.22745	-1.2188	8.13139	0.319294	0.569172	0.294206	0.560548	0.201708	0.0236247	0.0338271	8.13139	0.319294	0.569172	0.294206	0.560548	0.201708	0.0236247	0.0338271	282.144	0.224541	0.488924	0.227521	0.472626	0.137366	0.023846	0.020466	5031	5	11	5	10	3	1	1
col-94	WBGene00000669	COLlagen	219.967	4.25018	2.76492	1.02036	3.86254	1.07348	-1.43463	8.80508	1.02394	3.11146	2.49117	1.05302	2.97348	1.12623	0.503258	8.80508	1.02394	3.11146	2.49117	1.05302	2.97348	1.12623	0.503258	532.437	0.930656	7.3821	4.40298	1.06923	6.04994	1.31461	0.372286	22621	40	364	189	51	262	44	15
msp-59	WBGene00003452	Major sperm protein 19/31/40/45/50/51/53/59/61/65/81/113/142	215.851	-1.05456	1.32251	-1.12761	1.15809	-1.62182	-1.69567	8.55987	0.805976	0.729338	1.20925	0.632705	1.01772	0.108359	0.0441207	8.55987	0.805976	0.729338	1.20925	0.632705	1.01772	0.108359	0.0441207	430.151	0.670587	0.642369	1.22619	0.545289	0.876119	0.099916	0.027288	7670	12	14	22	11	16	2	1
msp-76	WBGene00003463	Major sperm protein 10/36/56/76	214.759	-1.12043	1.06335	-1.07883	-1.01532	1.22793	-1.26197	8.26377	0.51719	0.353138	0.605801	0.407718	0.495251	0.813416	0.181518	8.26377	0.51719	0.353138	0.605801	0.407718	0.495251	0.813416	0.181518	322.747	0.376299	0.286223	0.501861	0.343122	0.358959	0.855611	0.118542	5755	7	6	10	7	7	12	2
col-159	WBGene00000732	COLlagen	214.354	2.4632	2.6139	-1.25674	1.59555	-1.16377	-1.19497	8.87631	1.13246	2.43299	2.51866	0.802773	1.80651	0.913657	0.875478	8.87631	1.13246	2.43299	2.51866	0.802773	1.80651	0.913657	0.875478	571.939	1.07923	4.16866	4.51862	0.723625	2.14907	0.991243	0.733143	25016	48	212	199	35	96	34	30
msp-152	WBGene00003470	Major sperm protein 152	205.507	-1.39462	-1.28497	-1.19517	-1.17277	-1.55718	-1.57939	8.47207	0.789024	0.309148	0.427287	0.531814	0.559105	0.15009	0.129656	8.47207	0.789024	0.309148	0.427287	0.531814	0.559105	0.15009	0.129656	401.867	0.652474	0.251841	0.339359	0.444435	0.41895	0.142366	0.081865	7166	12	6	7	9	8	2	2
col-93	WBGene00000668	COLlagen	200.027	2.73652	1.41014	-3.05945	3.0655	-4.52104	-4.63487	10.5365	2.89245	4.3448	3.3883	1.27918	4.50858	0.715799	0.679926	10.5365	2.89245	4.3448	3.3883	1.27918	4.50858	0.715799	0.679926	2240.28	6.10314	19.4509	9.237	1.40045	21.2649	0.74488	0.522319	95178	260	959	395	66	918	25	21
msp-78	WBGene00003465	Major sperm protein 78	195.83	-1.40704	1.1615	-1.26854	-1.09703	-1.22868	-1.45027	8.18361	0.57015	0.0774821	0.786137	0.226985	0.43655	0.273041	0.0338271	8.18361	0.57015	0.0774821	0.786137	0.226985	0.43655	0.273041	0.0338271	297.505	0.428026	0.064336	0.696192	0.171419	0.315716	0.255101	0.020466	5305	8	2	13	4	6	4	1
msp-53	WBGene00003446	Major sperm protein 19/31/40/45/50/51/53/59/61/65/81/113/142	192.389	-1.2885	-1.02654	-1.35515	-1.33213	-1.58724	-1.83569	8.53343	0.945548	0.579855	0.90776	0.507093	0.531814	0.279026	0.0692283	8.53343	0.945548	0.579855	0.90776	0.507093	0.531814	0.279026	0.0692283	423.047	0.830676	0.498529	0.834912	0.423883	0.394604	0.261246	0.040932	7543	15	11	15	9	8	4	1
msp-113	WBGene00003468	Major sperm protein 19/31/40/45/50/51/53/59/61/65/81/113/142	191.475	-1.15191	-1.06838	-1.16447	-1.29496	1.06261	-1.33301	8.05665	0.475637	0.271606	0.380218	0.25596	0.102726	0.56325	0.0609518	8.05665	0.475637	0.271606	0.380218	0.25596	0.102726	0.56325	0.0609518	259.884	0.341182	0.21901	0.293332	0.205262	0.064968	0.564121	0.035816	4634	7	5	6	5	2	8	1
msp-33	WBGene00003431	Major sperm protein 33	188.513	-1.10023	-1.07636	-1.44739	-1.33087	-1.66034	-1.57071	8.40606	0.84754	0.709741	0.741375	0.314084	0.43517	0.116063	0.196127	8.40606	0.84754	0.709741	0.741375	0.314084	0.43517	0.116063	0.196127	378.646	0.716391	0.628845	0.650745	0.254118	0.314987	0.107305	0.132726	6752	13	14	12	6	6	2	3
msp-19	WBGene00003426	Major sperm protein 19/31/40/45/50/51/53/59/61/65/81/113/142	187.832	-1.22652	1.00756	-1.18664	-1.28663	-1.51978	-1.88043	8.49271	0.939407	0.644839	0.950266	0.692524	0.575809	0.335542	0.0283442	8.49271	0.939407	0.644839	0.950266	0.692524	0.575809	0.335542	0.0283442	410.058	0.823388	0.5644	0.888582	0.603545	0.432578	0.318824	0.017055	7312	15	12	16	12	8	5	1
col-147	WBGene00000720	COLlagen	186.146	1.21103	1.60049	1.74501	1.6341	2.01648	1.1475	7.789	0.248708	0.524943	0.927222	1.05195	0.957204	1.26055	0.4472	7.789	0.248708	0.524943	0.927222	1.05195	0.957204	1.26055	0.4472	200.066	0.172346	0.446541	0.858229	1.0682	0.811586	1.54482	0.324083	8110	7	21	35	48	34	50	12
ssq-4	WBGene00006053	Sperm-Specific family, class Q	180.418	-1.06386	1.13303	1.16496	-1.14983	-1.20386	-1.18019	7.86912	0.373923	0.28461	0.554112	0.594199	0.172503	0.106258	0.1349	7.86912	0.373923	0.28461	0.554112	0.594199	0.172503	0.106258	0.1349	215.675	0.267247	0.229826	0.453006	0.508241	0.113198	0.097933	0.084054	11236	14	14	24	30	6	4	4
msp-65	WBGene00003458	Major sperm protein 19/31/40/45/50/51/53/59/61/65/81/113/142	159.844	-1.2446	-1.24645	-1.14889	-1.17228	-1.24382	-1.31397	7.74829	0.427763	0.112079	0.109941	0.227521	0.198446	0.112989	0.0338271	7.74829	0.427763	0.112079	0.109941	0.227521	0.198446	0.112989	0.0338271	193.79	0.301003	0.092743	0.081785	0.171561	0.135783	0.103823	0.020466	3456	6	2	2	4	3	2	1
col-20	WBGene00000609	COLlagen	150.372	3.5463	2.0149	-2.04007	2.39962	-1.47486	-5.06202	11.2537	4.02131	5.84762	5.03201	2.99269	5.28411	3.46073	1.68159	11.2537	4.02131	5.84762	5.03201	2.99269	5.28411	3.46073	1.68159	3837.08	15.1879	58.0953	32.5958	7.0127	38.5516	10.6904	1.97572	154465	613	2714	1320	313	1577	338	73
msp-31	WBGene00003429	Major sperm protein 19/31/40/45/50/51/53/59/61/65/81/113/142	146.832	-1.07032	1.13893	-1.28024	-1.04163	1.06488	-1.14689	8.70858	1.51056	1.41252	1.69824	1.15415	1.45172	1.60126	1.31284	8.70858	1.51056	1.41252	1.69824	1.15415	1.45172	1.60126	1.31284	499.999	1.64375	1.57806	2.14197	1.21047	1.47088	2.18117	1.29302	8915	30	33	39	24	27	31	22
C04F12.7	WBGene00007301	Uncharacterized protein	145.335	-1.39855	1.01483	-1.22136	-1.49287	-1.2853	-1.3939	7.94402	0.760788	0.276857	0.782027	0.472295	0.182701	0.398683	0.281661	7.94402	0.760788	0.276857	0.782027	0.472295	0.182701	0.398683	0.281661	233.039	0.621661	0.223482	0.691896	0.395644	0.121856	0.3814	0.193572	6590	18	8	20	13	4	9	5
col-142	WBGene00000715	COLlagen	138.747	2.08734	1.6181	-1.14589	1.37668	-1.06129	-1.63405	9.16054	2.04423	3.10589	2.73852	1.84775	2.50541	1.9584	1.33577	9.16054	2.04423	3.10589	2.73852	1.84775	2.50541	1.9584	1.33577	717.258	2.78537	7.34016	5.43827	2.57423	4.02581	3.1239	1.33116	32571	127	387	249	130	186	112	56
F08H9.2	WBGene00008590	Uncharacterized protein	133.863	-1.01073	1.17907	1.15197	1.13705	1.12289	1.00905	7.19517	0.130551	0.115156	0.368198	0.334655	0.31585	0.297767	0.143554	7.19517	0.130551	0.115156	0.368198	0.334655	0.31585	0.297767	0.143554	112.445	0.086099	0.09447	0.280519	0.271942	0.214738	0.279595	0.089692	2052	2	3	6	6	4	5	2
Y59E9AR.7	WBGene00022002	Major sperm protein	123.53	-1.38846	-1.19999	-1.51101	-1.36249	-1.53747	-1.82597	7.97788	1.02916	0.555674	0.766136	0.433651	0.582915	0.408604	0.1605	7.97788	1.02916	0.555674	0.766136	0.433651	0.582915	0.408604	0.1605	242.336	0.940314	0.474319	0.676005	0.363928	0.438766	0.394161	0.103023	4423	18	11	13	8	9	6	2
R10E9.2	WBGene00011214	Uncharacterized protein	118.033	-1.02992	1.08714	-1.16253	1.07179	1.05203	-1.0168	7.16817	0.285127	0.242601	0.405659	0.067863	0.385144	0.358304	0.261088	7.16817	0.285127	0.242601	0.405659	0.067863	0.385144	0.358304	0.261088	109.205	0.19917	0.190158	0.319098	0.049959	0.271833	0.337886	0.181362	3955	8	8	12	2	11	10	6
Y59E9AR.1	WBGene00021997	Major sperm protein	112.052	-1.52498	-1.42232	-1.66461	-1.55037	-1.55841	-1.8049	7.82849	1.02047	0.41168	0.512227	0.285288	0.38786	0.380395	0.168557	7.82849	1.02047	0.41168	0.512227	0.285288	0.38786	0.380395	0.168557	206.743	0.926009	0.333617	0.418199	0.231316	0.274077	0.35939	0.109095	3773	17	8	8	5	6	6	2
msp-58	WBGene00003451	Major Sperm Protein	111.474	1.04795	-1.02601	1.00698	1.04567	1.02699	-1.11502	6.97395	0.173387	0.240963	0.136337	0.183422	0.237815	0.211811	0.0163199	6.97395	0.173387	0.240963	0.136337	0.183422	0.237815	0.211811	0.0163199	89.9491	0.118501	0.188879	0.102787	0.141208	0.162237	0.196528	0.010225	978	2	3	2	2	2	2	1
col-124	WBGene00000698	COLlagen	99.8272	3.90175	2.59274	2.00256	1.84835	1.71772	-1.00219	11.6558	5.01446	6.97858	6.38893	6.0163	5.90069	5.79495	5.0113	11.6558	5.01446	6.97858	6.38893	6.0163	5.90069	5.79495	5.0113	5045.01	32.0429	128.093	87.942	70.3548	61.8377	57.5652	30.6489	205199	1306	6045	3598	3164	2555	1836	1139
C15C6.2	WBGene00007601	Uncharacterized protein	99.7091	1.29948	1.40724	1.44076	1.27334	-1.04228	1.11536	7.21581	0.576159	0.954093	1.06903	1.10299	0.924772	0.516421	0.73367	7.21581	0.576159	0.954093	1.06903	1.10299	0.924772	0.516421	0.73367	114.962	0.434803	0.898197	1.04225	1.14831	0.777466	0.507622	0.580781	4644	19	42	43	49	32	17	22
gipc-1	WBGene00016440	GIPC (RGS-GAIP Interacting Protein C) homolog	97.6941	-1.17661	-1.24694	-1.29202	-1.32891	-1.37724	-1.50191	7.48621	0.87601	0.641379	0.557621	0.506385	0.465766	0.414229	0.289211	7.48621	0.87601	0.641379	0.557621	0.506385	0.465766	0.414229	0.289211	152.151	0.744246	0.559943	0.45777	0.423544	0.335419	0.402149	0.197138	7588	38	33	23	24	17	16	9	Highly expressed in sperm (CenGen)
F21H7.5	WBGene00009031	Major sperm protein	96.7615	1.01755	-1.25641	-1.22543	-1.172	-1.10208	-1.2071	7.08383	0.487465	0.512568	0.158161	0.194176	0.25849	0.347242	0.215923	7.08383	0.487465	0.512568	0.158161	0.194176	0.25849	0.347242	0.215923	100.53	0.351827	0.434148	0.116247	0.150601	0.1746	0.328092	0.146318	4299	16	22	5	8	8	12	6
spch-3	WBGene00020840	SPerm CHromatin enriched	89.3254	-1.31657	-1.80714	-1.77826	-1.58517	-1.54781	-1.78428	7.49376	1.01276	0.615972	0.159049	0.182288	0.348123	0.382531	0.177417	7.49376	1.01276	0.615972	0.159049	0.182288	0.348123	0.382531	0.177417	153.14	0.918184	0.535469	0.117089	0.140429	0.242518	0.361754	0.115574	4352	27	18	4	5	8	9	3
col-12	WBGene00000601	Cuticle collagen 12	81.9366	1.3628	1.31026	1.44697	1.50516	1.30361	1.03476	6.70368	0.347242	0.793811	0.737096	0.880275	0.937157	0.729753	0.396534	6.70368	0.347242	0.793811	0.737096	0.880275	0.937157	0.729753	0.396534	72.1867	0.247236	0.721621	0.644494	0.815904	0.791599	0.76075	0.281056	3188	11	37	29	40	36	27	12
col-160	WBGene00000733	COLlagen	78.6599	5.54956	5.46733	-1.23465	3.55725	-1.30496	-1.60092	10.0642	3.76669	6.23906	6.21753	3.46259	5.59745	3.38268	3.08779	10.0642	3.76669	6.23906	6.21753	3.46259	5.59745	3.38268	3.08779	1502.89	12.5774	77.1281	77.5177	10.093	49.1373	10.0161	6.63421	66572	559	3964	3454	495	2211	348	269
ZK328.11	.	Unclassified non-coding RNA ZK328.11	77.6108	67.9989	61.5857	55.8766	61.9199	67.4477	61.7413	6.51756	0.239378	6.32682	6.1839	6.04355	6.19171	6.31508	6.18754	6.51756	0.239378	6.32682	6.1839	6.04355	6.19171	6.31508	6.18754	62.38	0.166498	81.8275	75.926	71.7053	75.9438	82.841	75.4565	635	2	966	777	806	785	661	701
Y57G11A.2	WBGene00013290	Uncharacterized protein	77.0811	-1.02141	-1.0529	-1.18047	-1.15705	-1.16697	-1.19203	6.58416	0.31585	0.285288	0.241488	0.0764862	0.105403	0.0930823	0.0624272	6.58416	0.31585	0.285288	0.241488	0.0764862	0.105403	0.0930823	0.0624272	65.6307	0.223546	0.230093	0.186154	0.060693	0.066156	0.085711	0.03666	5860	20	24	17	6	7	7	3
spch-1	WBGene00007307	SPerm CHromatin enriched	76.5656	-1.60496	-1.46986	-1.35485	-1.76248	-1.18856	-1.73618	7.18028	0.921651	0.239113	0.365977	0.483516	0.104041	0.672442	0.125737	7.18028	0.921651	0.239113	0.365977	0.483516	0.104041	0.672442	0.125737	110.972	0.801446	0.187199	0.279821	0.40531	0.065712	0.690487	0.079384	3061	23	6	8	13	2	15	2
K08D12.6	WBGene00019540	Uncharacterized protein	76.2454	2.58597	1.65471	1.44425	1.82345	1.25264	-1.10068	9.08983	2.83725	4.20796	3.56383	3.36757	3.70392	3.16222	2.69885	9.08983	2.83725	4.20796	3.56383	3.36757	3.70392	3.16222	2.69885	682.933	5.75419	17.5322	10.6368	9.3713	11.1488	8.49353	4.88436	63641	538	1896	997	966	1056	621	416
col-13	WBGene00000602	Cuticle collagen 13	70.6307	1.18431	1.11008	1.11223	1.39066	1.20194	-1.01928	6.41621	0.273987	0.518035	0.424655	0.427442	0.749762	0.53935	0.24644	6.41621	0.273987	0.518035	0.424655	0.427442	0.749762	0.53935	0.24644	58.0541	0.189129	0.439647	0.337294	0.358	0.601094	0.534241	0.169861	2564	9	23	15	18	27	19	7
T23G11.1	WBGene00011968	Uncharacterized protein	69.4886	-1.19591	-1.17309	-1.35452	-1.41526	-1.34105	-1.33359	6.92801	0.809303	0.551197	0.578988	0.371517	0.308239	0.385942	0.393984	6.92801	0.809303	0.551197	0.578988	0.371517	0.308239	0.385942	0.393984	86.7556	0.674532	0.470965	0.478376	0.307442	0.209102	0.366999	0.279018	2043	16	13	12	8	5	7	6
B0280.17	WBGene00044674	Uncharacterized protein	65.6185	1.03384	1.00713	1.27415	1.01644	1.38272	1.02391	6.10033	0.0643038	0.112315	0.0745496	0.413843	0.087835	0.531814	0.0983956	6.10033	0.0643038	0.112315	0.0745496	0.413843	0.087835	0.531814	0.0983956	47.2654	0.041584	0.093189	0.054694	0.348375	0.054158	0.526249	0.060222	1719	2	4	2	15	2	16	2
K06A5.2	WBGene00019430	Uncharacterized protein	65.2169	1.21752	1.22566	1.28764	-1.03777	1.22228	1.42671	6.89961	0.872437	1.15638	1.166	1.23717	0.818954	1.16202	1.38513	6.89961	0.872437	1.15638	1.166	1.23717	0.818954	1.16202	1.38513	84.4899	0.741112	1.16974	1.1723	1.34112	0.669508	1.37135	1.42422	3920	35	63	55	69	32	50	61
T10E9.4	WBGene00020414	Uncharacterized protein	62.5944	-1.15769	-1.25753	-1.29749	-1.20601	-1.1455	-1.28827	6.37339	0.405429	0.194176	0.0748336	0.0297106	0.13519	0.209455	0.0399918	6.37339	0.405429	0.194176	0.0748336	0.0297106	0.13519	0.209455	0.0399918	56.4663	0.286477	0.147036	0.054904	0.018036	0.086247	0.195173	0.024182	5113	26	16	5	2	8	14	3
col-80	WBGene00000656	Putative cuticle collagen 80	60.6151	2.91284	1.60129	-3.10529	1.77009	-4.1864	-7.06233	10.6733	4.75166	6.29409	5.4309	3.11693	5.57548	2.68595	1.93151	10.6733	4.75166	6.29409	5.4309	3.11693	5.57548	2.68595	1.93151	2512.09	26.3444	79.952	43.9086	7.76016	48.5135	5.80371	2.47383	111274	1170	4109	1957	380	2183	202	101
ssq-1	WBGene00006050	Sperm-Specific family, class Q	59.3198	-1.04485	-1.41453	-1.10662	-1.56098	-1.63438	-1.30459	7.84356	1.95312	1.88982	1.45279	1.80695	1.31067	1.24437	1.56953	7.84356	1.95312	1.88982	1.45279	1.80695	1.31067	1.24437	1.56953	209.959	2.57153	2.54429	1.64943	2.47272	1.26896	1.51288	1.75759	8511	105	120	68	111	53	49	66
Y106G6H.13	WBGene00013723	Uncharacterized protein	57.0033	-1.19282	-1.06359	-1.27037	-1.16724	1.00037	-1.29834	6.41787	0.584897	0.330523	0.49596	0.239645	0.361795	0.585426	0.208226	6.41787	0.584897	0.330523	0.49596	0.239645	0.361795	0.585426	0.208226	58.1487	0.441954	0.267098	0.404695	0.186898	0.254232	0.591578	0.141069	1126	9	6	8	5	5	9	3
spch-2	WBGene00015689	SPerm CHromatin enriched	56.578	-1.39124	-1.40868	-1.62964	-1.57643	-1.14418	-1.55603	6.63745	0.815282	0.338906	0.32094	0.110726	0.158619	0.620963	0.177417	6.63745	0.815282	0.338906	0.32094	0.110726	0.158619	0.620963	0.177417	68.5132	0.679641	0.274492	0.247688	0.087788	0.103936	0.631959	0.115574	1947	20	10	8	3	3	15	3
F53B6.4	WBGene00009959	Major sperm protein	56.2305	-1.08205	-1.0627	-1.166	-1.09114	-1.43362	-1.36978	6.85014	1.03685	0.923084	0.949117	0.815282	0.911023	0.51719	0.582915	6.85014	1.03685	0.923084	0.949117	0.815282	0.911023	0.51719	0.582915	81.4171	0.949637	0.857325	0.885924	0.73469	0.766475	0.50838	0.439761	3527	43	45	40	38	36	19	19
F49C12.15	WBGene00009884	Uncharacterized protein	54.7336	1.324	1.52606	1.19945	1.29454	1.49637	1.06348	6.39185	0.617496	1.0224	1.22731	0.879864	0.989938	1.19896	0.706292	6.39185	0.617496	1.0224	1.22731	0.879864	0.989938	1.19896	0.706292	57.0552	0.477942	0.989608	1.25222	0.815183	0.842698	1.43171	0.546462	6915	59	140	153	110	104	137	61
F07A5.2	WBGene00008541	Uncharacterized protein	53.7075	1.18431	1.32275	-1.01339	-1.12383	1.07214	1.02588	6.77862	1.03157	1.27562	1.43511	1.01238	0.863149	1.13206	1.06844	6.77862	1.03157	1.27562	1.43511	1.01238	0.863149	1.13206	1.06844	77.2993	0.943479	1.35295	1.61744	1.00591	0.716868	1.32027	0.956512	3349	41	69	71	49	32	45	38
C50E10.1	WBGene00016825	Uncharacterized protein	51.8133	1.04868	-1.21768	-1.00968	-1.32045	-1.40467	-1.08671	6.424	0.728745	0.797317	0.444609	0.714852	0.327717	0.238515	0.608779	6.424	0.728745	0.797317	0.444609	0.714852	0.327717	0.238515	0.608779	58.4394	0.585376	0.723227	0.357362	0.626036	0.224565	0.221861	0.461969	1002	11	15	7	12	4	3	8
T13F3.6	WBGene00011753	Uncharacterized protein	51.086	2.31559	1.54628	-1.1263	1.10397	-1.36746	-1.21122	8.7313	3.05645	4.26783	3.68525	2.88485	3.19914	2.60495	2.77999	8.7313	3.05645	4.26783	3.68525	2.88485	3.19914	2.60495	2.77999	504.72	7.03789	18.4096	11.665	6.39197	7.39021	5.49168	5.25484	11882	167	503	277	167	177	102	113
col-19	WBGene00000608	Cuticle collagen 19	50.3495	3.09164	2.16728	1.58665	1.86702	1.81207	-1.10611	10.8022	5.14825	6.77662	6.26413	5.81423	6.04898	6.00589	5.00275	10.8022	5.14825	6.77662	6.26413	5.81423	6.04898	6.00589	5.00275	2715.38	35.2083	112.021	80.477	59.9788	68.5587	66.8117	30.3877	109688	1426	5251	3270	2679	2814	2116	1122
ZK858.2	WBGene00014116	Uncharacterized protein	48.6924	-1.14698	1.08725	1.09841	-1.06633	-1.25303	1.22397	6.43813	0.832509	0.634673	0.953192	0.967926	0.739851	0.507093	1.12408	6.43813	0.832509	0.634673	0.953192	0.967926	0.739851	0.507093	1.12408	59.0275	0.695905	0.554497	0.890817	0.937684	0.591249	0.498634	1.0304	2105	25	23	32	37	22	14	34
Y38E10A.17	WBGene00012595	Uncharacterized protein	48.2132	-1.04958	-1.00523	-1.15515	-1.14171	-1.15314	-1.18082	5.89809	0.30673	0.236923	0.299203	0.0986463	0.115539	0.101157	0.0669417	5.89809	0.30673	0.236923	0.299203	0.0986463	0.115539	0.101157	0.0669417	41.9438	0.218359	0.185987	0.230909	0.076383	0.072242	0.093286	0.040165	3430	18	18	19	7	7	6	3
F32H2.7	WBGene00009344	Uncharacterized protein	47.4963	-1.06761	-1.06073	-1.08948	-1.10831	-1.09406	-1.1015	5.77427	0.20453	0.110148	0.119467	0.080892	0.0561667	0.0748336	0.0650567	5.77427	0.20453	0.110148	0.119467	0.080892	0.0561667	0.0748336	0.0650567	39.2346	0.141874	0.091746	0.088336	0.064304	0.034988	0.067996	0.038906	2208	9	6	6	4	3	3	3
F21C10.9	WBGene00017658	Uncharacterized protein	47.1264	-1.49201	-1.27068	-1.68675	-1.30474	-1.19993	-1.56487	6.66176	1.1033	0.526041	0.757694	0.34905	0.719532	0.84035	0.457251	6.66176	1.1033	0.526041	0.757694	0.34905	0.719532	0.84035	0.457251	69.8157	1.03547	0.447544	0.669579	0.285728	0.569717	0.890642	0.334249	3093	46	23	30	14	26	31	14
ram-2	WBGene00004300	Uncharacterized protein	45.4524	1.72825	1.86385	1.82661	1.58527	2.77571	1.66659	6.31792	0.811639	1.60095	1.70993	1.6808	1.47637	2.2845	1.54854	6.31792	0.811639	1.60095	1.70993	1.6808	1.47637	2.2845	1.54854	54.3244	0.67656	1.92955	2.16197	2.15638	1.52194	4.19963	1.72073	2324	29	96	93	102	67	141	68
ZK512.8	WBGene00013987	Uncharacterized protein	44.1549	1.45269	1.43	1.1903	1.11551	1.30274	1.36272	5.69892	0.234423	0.773146	0.750437	0.48575	0.392121	0.615972	0.680916	5.69892	0.234423	0.773146	0.750437	0.48575	0.392121	0.615972	0.680916	37.5187	0.161407	0.691014	0.659852	0.407134	0.278829	0.625138	0.522517	899	4	20	16	11	7	12	12
spe-11	WBGene00004965	Spermatocyte protein spe-11	43.8765	1.00419	-1.10767	1.33146	1.05215	1.519	1.24621	5.73064	0.275259	0.281299	0.12773	0.688268	0.348602	0.878377	0.592803	5.73064	0.275259	0.281299	0.12773	0.688268	0.348602	0.878377	0.592803	38.2148	0.190585	0.226885	0.095168	0.598775	0.242812	0.941646	0.448242	1597	8	11	5	28	11	31	18
col-179	WBGene00000752	COLlagen	42.3991	3.71597	2.6511	1.30324	2.27908	1.98647	-1.77239	9.4741	4.06814	5.96187	5.47473	4.45024	5.25659	5.05834	3.24244	9.4741	4.06814	5.96187	5.47473	4.45024	5.25659	5.05834	3.24244	905.692	15.9294	62.7191	45.3409	21.3975	37.8437	34.2413	7.57438	35829	632	2879	1805	936	1521	1063	274
col-98	WBGene00000673	COLlagen	41.5195	1.57117	-1.17012	-2.08841	1.05232	-3.2765	-2.12302	9.67118	4.29547	4.94731	4.06881	3.23306	4.36904	2.58331	3.20935	9.67118	4.29547	4.94731	4.06881	3.23306	4.36904	2.58331	3.20935	1033.11	18.6205	30.3817	15.8158	8.44295	19.0571	5.38157	7.38756	44036	796	1503	679	398	826	180	288
nspa-3	WBGene00013888	Nematode Specific Peptide family, group A	41.2863	-1.04246	-1.11029	1.27925	-1.01672	-1.2732	5.11747	7.41587	2.04828	1.98828	1.89734	2.40358	2.02436	1.69982	4.40371	7.41587	2.04828	1.98828	1.89734	2.40358	2.02436	1.69982	4.40371	140.038	2.79357	2.8112	2.62199	4.32021	2.60114	2.39488	19.0358	683	14	16	13	24	13	10	85
F56B3.6	WBGene00018930	Receptor expression-enhancing protein	39.9156	1.20203	-1.02278	1.08401	-1.18185	-1.04665	1.18786	5.86144	0.542561	0.808038	0.510065	0.658934	0.301512	0.476781	0.790924	5.86144	0.542561	0.808038	0.510065	0.658934	0.301512	0.476781	0.790924	41.0615	0.400829	0.734884	0.417497	0.565626	0.205175	0.467156	0.642138	1179	12	25	13	18	6	11	17
K04H4.5	WBGene00010574	Uncharacterized protein	39.5252	-1.26583	-1.37162	-1.17754	-1.07715	-1.30343	-1.07669	5.83969	0.534985	0.194896	0.0791008	0.299203	0.427763	0.152669	0.428384	5.83969	0.534985	0.194896	0.0791008	0.299203	0.427763	0.152669	0.428384	40.5975	0.394921	0.147328	0.056648	0.241673	0.308509	0.144266	0.311557	1426	14	6	3	10	12	4	10
nspd-7	WBGene00012781	Nematode Specific Peptide family, group D	39.0497	-1.22509	-1.67002	-1.05877	-1.21353	1.32939	-1.18841	7.58768	2.30044	2.00756	1.56058	2.21805	2.02123	2.71121	2.05141	7.58768	2.30044	2.00756	1.56058	2.21805	2.02123	2.71121	2.05141	167.641	3.57883	2.8553	1.85332	3.67348	2.59801	5.92998	2.79356	1658	36	33	19	41	27	46	26	Expressed in sperm (CenGen)
Y106G6G.4	WBGene00013713	Uncharacterized protein	38.2191	1.46074	1.79106	1.48148	1.6595	2.80087	1.62278	5.60809	0.351868	0.898563	1.19268	0.918908	1.08262	1.83774	1.05034	5.60809	0.351868	0.898563	1.19268	0.918908	1.08262	1.83774	1.05034	35.7414	0.249178	0.8296	1.20339	0.867901	0.950764	2.79384	0.937814	1574	11	43	54	43	43	97	38
nspa-1	WBGene00010377	Nematode Specific Peptide family, group A	36.8108	-1.09515	-1.15774	1.23414	-1.41039	-1.3746	4.55552	7.38793	2.18587	2.05475	1.97456	2.48938	1.68978	1.72686	4.37349	7.38793	2.18587	2.05475	1.97456	2.48938	1.68978	1.72686	4.37349	135.048	3.18542	2.98565	2.79631	4.59508	1.89471	2.4654	18.6389	659	16	17	14	25	10	10	84
smz-1	WBGene00007733	Sperm Meiosis PDZ domain containing proteins	35.3165	-1.08287	-1.12811	1.0487	-1.36261	-1.59069	-1.07462	6.53952	1.39725	1.28239	1.22335	1.46586	0.950881	0.727602	1.29342	6.53952	1.39725	1.28239	1.22335	1.46586	0.950881	0.727602	1.29342	63.5213	1.47266	1.36387	1.24943	1.74299	0.80486	0.758132	1.26395	2434	57	61	49	74	32	23	45
C39B5.5	WBGene00016523	Cystatin	34.3505	-1.00719	-1.03624	-1.0919	-1.022	1.11994	-1.22848	5.73713	0.63487	0.624535	0.583514	0.508025	0.603481	0.798296	0.337996	5.73713	0.63487	0.624535	0.583514	0.508025	0.603481	0.798296	0.337996	38.3921	0.491266	0.544985	0.481324	0.424855	0.456068	0.840303	0.234597	1075	14	18	14	14	13	19	6
nlp-24	WBGene00003762	Neuropeptide-Like Protein	33.5852	1.34887	-1.09449	-1.1327	1.24458	-1.50547	-1.5046	7.65356	2.58381	3.01556	2.45355	2.40405	2.89948	1.9936	1.99443	7.65356	2.58381	3.01556	2.45355	2.40405	2.89948	1.9936	1.99443	179.031	4.60566	6.75278	4.26981	4.32345	5.64048	3.22573	2.65041	2020	53	89	49	54	65	29	28	Expressed in epidermis (CEnGEn)
Y38H8A.3	WBGene00012637	Uncharacterized protein	33.2076	-1.41625	-1.23466	-1.34668	-1.29383	1.13247	-1.46057	5.87188	0.818444	0.316367	0.514329	0.389039	0.446797	0.997918	0.271908	5.87188	0.818444	0.316367	0.514329	0.389039	0.446797	0.997918	0.271908	41.2665	0.682282	0.257675	0.419378	0.326723	0.321576	1.10694	0.188484	1777	30	13	19	16	15	38	8
col-180	WBGene00000753	COLlagen	32.8096	-1.27961	-1.36001	-1.23792	-1.34326	-1.35704	-1.34356	5.60686	0.570814	0.215107	0.127193	0.262897	0.145081	0.130346	0.144755	5.60686	0.570814	0.215107	0.127193	0.262897	0.145081	0.130346	0.144755	35.6921	0.428451	0.164459	0.094852	0.209362	0.093922	0.121383	0.090738	1497	18	8	5	10	5	4	4
grd-13	WBGene00001702	GRounDhog (hedgehog-like family)	32.7669	-1.09015	1.22187	-1.16067	1.05293	1.1941	-1.22482	5.53685	0.502686	0.37816	0.791778	0.287722	0.577096	0.758607	0.210115	5.53685	0.502686	0.37816	0.791778	0.287722	0.577096	0.758607	0.210115	34.4444	0.363722	0.309057	0.704891	0.23387	0.434039	0.789961	0.142794	754	8	8	16	6	10	14	3	Expressed in epidermis (CEnGEn)
snf-5	WBGene00004904	Transporter	32.3613	-1.04943	1.07801	1.03045	-1.06375	-1.1196	1.11751	5.26264	0.24644	0.176827	0.354804	0.289715	0.15728	0.0834576	0.406723	5.26264	0.24644	0.176827	0.354804	0.289715	0.15728	0.0834576	0.406723	29.7098	0.170969	0.136673	0.273677	0.235429	0.103285	0.07524	0.288424	3017	18	17	28	27	11	6	27	Expressed in sperm (CenGen)
ssp-10	WBGene00006039	Sperm-specific class P protein 10	32.0009	-1.29206	-1.60605	-2.82056	-1.57802	-1.86098	-1.95712	7.3438	2.34376	1.97409	1.66024	0.847776	1.68565	1.4477	1.37502	7.3438	2.34376	1.97409	1.66024	0.847776	1.68565	1.4477	1.37502	129.968	3.71969	2.77141	2.06739	0.772818	1.88937	1.86844	1.40345	1992	58	50	32	14	30	23	20
col-103	WBGene00000677	COLlagen	31.4925	1.84394	1.13059	-1.22214	1.2461	-1.7032	-1.46774	9.39056	4.41362	5.29641	4.5907	4.12421	4.73104	3.64538	3.86002	9.39056	4.41362	5.29641	4.5907	4.12421	4.73104	3.64538	3.86002	843.597	20.2314	38.9019	23.5486	16.6475	25.2022	12.1712	12.3382	43713	1051	2339	1228	954	1327	495	585
col-167	WBGene00000740	COLlagen	31.3277	1.22925	1.04158	1.1119	-1.04284	1.08629	-1.25037	6.20093	1.23156	1.52934	1.29034	1.38459	1.17104	1.35096	0.909207	6.20093	1.23156	1.52934	1.29034	1.38459	1.17104	1.35096	0.909207	50.3472	1.22415	1.78431	1.35559	1.57609	1.06621	1.71479	0.784492	2118	52	88	58	74	46	57	31
F11E6.3	WBGene00008707	Uncharacterized protein	30.3556	1.97511	1.90895	1.10445	1.25333	1.13921	-1.02103	9.7973	4.87341	5.85534	5.80619	5.01675	5.19918	5.06145	4.84339	9.7973	4.87341	5.85534	5.80619	5.01675	5.19918	5.06145	4.84339	1138.13	28.4141	58.2996	57.423	33.3401	36.2069	34.308	27.142	54853	1373	3260	2784	1777	1773	1297	1195
col-155	WBGene00000728	Putative cuticle collagen 155	30.0757	-1.2999	-1.03983	-1.85996	-1.23305	-1.65336	-1.397	6.80462	1.89409	1.5157	1.83774	0.99882	1.59186	1.16869	1.41176	6.80462	1.89409	1.5157	1.83774	0.99882	1.59186	1.16869	1.41176	78.7295	2.40418	1.75402	2.47095	0.98353	1.71117	1.37971	1.46183	3290	101	86	104	46	73	46	56
C17H12.12	WBGene00015937	Uncharacterized protein	29.8704	1.08081	1.21691	1.05946	1.14951	1.07878	1.11372	4.93874	0.0380921	0.150198	0.321311	0.121425	0.239113	0.147492	0.19348	4.93874	0.0380921	0.150198	0.321311	0.121425	0.239113	0.147492	0.19348	25.9355	0.023568	0.122127	0.247692	0.096139	0.162742	0.138439	0.12926	2197	3	13	22	9	14	10	10
C30G7.3	WBGene00044177	Uncharacterized protein	28.5775	-1.0862	-1.13238	-1.02658	-1.1183	-1.10609	-1.05955	5.14287	0.306067	0.186776	0.126708	0.268227	0.144755	0.160599	0.22261	5.14287	0.306067	0.186776	0.126708	0.268227	0.144755	0.160599	0.22261	28.3424	0.217744	0.143425	0.094537	0.21495	0.093611	0.151602	0.154078	1193	10	7	4	10	4	5	6
pho-13	WBGene00008560	intestinal acid PHOsphatase	28.0284	2.73838	2.62308	1.13743	2.43791	2.05413	-1.19386	5.91059	1.10178	2.5551	2.49304	1.28756	2.38742	2.1403	0.846143	5.91059	1.10178	2.5551	2.49304	1.28756	2.38742	2.1403	0.846143	42.1652	1.03327	4.69398	4.41404	1.41426	3.60373	3.70579	0.701527	2633	65	340	279	98	228	182	40	Expressed in sperm (CenGen)
F32A11.3	WBGene00009308	Uncharacterized protein	27.8197	1.25206	1.16543	-1.045	1.26086	-1.18402	1.38209	6.19171	1.39367	1.71798	1.61454	1.33018	1.72808	1.14998	1.86053	6.19171	1.39367	1.71798	1.61454	1.33018	1.72808	1.14998	1.86053	49.9051	1.46684	2.17561	1.96855	1.4799	1.98386	1.35223	2.32271	2461	73	125	98	81	100	53	105
R10E4.7	WBGene00011203	Uncharacterized protein	27.2691	1.15599	1.34295	-1.12453	1.07163	-1.20026	1.05779	5.91031	1.14111	1.35025	1.56652	0.971794	1.24092	0.877763	1.22216	5.91031	1.14111	1.35025	1.56652	0.971794	1.24092	0.877763	1.22216	42.1641	1.08806	1.45984	1.86631	0.945399	1.15956	0.940949	1.16521	1163	31	47	52	29	33	21	30
cpg-9	WBGene00022072	Chondroitin proteoglycan 9	26.9197	1.23431	1.21338	-1.46148	1.34247	-1.50226	-1.58922	8.41653	3.66594	3.96965	3.94497	3.11851	4.09083	3.0788	2.99762	8.41653	3.66594	3.96965	3.94497	3.11851	4.09083	3.0788	2.99762	383.666	11.7239	14.5155	14.3842	7.76609	15.2389	7.90173	6.2383	3741	115	165	142	84	151	61	56
T08B6.4	WBGene00020353	Uncharacterized protein	26.7531	-1.00866	1.01114	1.08842	1.20858	1.25393	1.22388	5.18593	0.444299	0.431861	0.460286	0.566535	0.717607	0.770753	0.73576	5.18593	0.444299	0.431861	0.460286	0.566535	0.717607	0.770753	0.73576	28.807	0.315289	0.35179	0.368807	0.478108	0.568451	0.808631	0.584329	2536	28	36	33	47	51	56	47
col-178	WBGene00000751	COLlagen	25.9263	3.31477	2.23455	-1.08041	1.72194	1.15413	-2.08697	10.6958	5.99947	7.72838	7.15945	5.88789	6.7835	6.20627	4.93806	10.6958	5.99947	7.72838	7.15945	5.88789	6.7835	6.20627	4.93806	2515.34	64.8465	215.049	147.954	63.2553	114.56	76.9834	28.9146	99506	2571	9871	5887	2767	4604	2388	1045
col-125	WBGene00000699	COLlagen	25.7442	1.15338	1.35492	1.56409	1.16174	1.73777	1.35151	5.59683	0.91065	1.11652	1.34886	1.55598	1.12694	1.70788	1.34522	5.59683	0.91065	1.11652	1.34886	1.55598	1.12694	1.70788	1.34522	35.5226	0.787639	1.11237	1.44691	1.91169	1.00409	2.42497	1.35038	1485	33	54	61	89	43	80	52
col-8	WBGene00000597	Cuticle collagen 8	25.7047	2.44447	1.61837	1.22011	1.40226	-1.43859	-1.04138	10.2026	5.51862	6.80814	6.21317	5.80563	6.00638	4.99396	5.46013	10.2026	5.51862	6.80814	6.21317	5.80563	6.00638	4.99396	5.46013	1755.24	45.9524	114.362	77.3645	59.5601	66.7111	32.6502	44.0867	72126	1893	5453	3198	2706	2785	1052	1655
F41H10.1	WBGene00018314	Uncharacterized protein	25.2974	-1.49057	-1.34001	1.10445	1.06076	1.26223	1.04028	6.92656	2.26564	1.68978	1.8434	2.40896	2.35074	2.60161	2.32261	6.92656	2.26564	1.68978	1.8434	2.40896	2.35074	2.60161	2.32261	86.5323	3.44692	2.11697	2.48369	4.33846	3.49384	5.47805	3.53987	2447	98	70	71	136	101	122	92
C27D8.1	WBGene00007777	Uncharacterized protein	25.2738	-1.07786	1.11969	-1.19304	-1.23111	-1.2013	-1.00658	5.24837	0.588803	0.480635	0.751902	0.334167	0.288844	0.324203	0.579344	5.24837	0.588803	0.480635	0.751902	0.334167	0.288844	0.324203	0.579344	29.562	0.444242	0.40308	0.662954	0.27192	0.19393	0.307086	0.436981	1351	21	22	31	14	10	11	19
col-42	WBGene00013489	COLlagen	24.9109	1.73384	-1.12092	-1.5201	1.11004	-2.93626	-1.93545	9.83152	5.19282	5.98679	5.02813	4.58865	5.34343	3.63884	4.24015	9.83152	5.19282	5.98679	5.02813	4.58865	5.34343	3.63884	4.24015	1163.38	36.3646	63.9388	32.5545	23.8807	40.6427	12.1301	16.806	54936	1721	3503	1547	1247	1950	450	725
grd-3	WBGene00001692	GRounDhog (hedgehog-like family)	24.5789	-1.89766	-1.71118	-3.11077	-2.12437	-4.78692	-3.85989	7.97312	3.35377	2.42955	2.57877	1.71649	2.26674	1.09467	1.40521	7.97312	3.35377	2.42955	2.57877	1.71649	2.26674	1.09467	1.40521	240.311	8.96108	4.16165	4.76356	2.24322	3.25161	1.25231	1.45107	6093	228	123	122	63	84	25	34	Expressed in epidermis (CEnGEn)
col-140	WBGene00000713	COLlagen	24.4662	3.94979	2.64804	1.00227	1.95235	1.35563	-2.19302	11.2695	6.65675	8.63853	8.06168	6.66002	7.62196	7.09571	5.52383	11.2695	6.65675	8.63853	8.06168	6.66002	7.62196	7.09571	5.52383	3921.34	102.728	398.603	268.698	110.234	199.481	140.188	46.3387	158403	4159	18682	10918	4923	8186	4440	1710
msra-1	WBGene00018393	Methionine Sulfoxide Reductase A	24.2467	1.86539	1.4136	1.10161	1.19558	2.44085	-1.4014	9.52735	4.92764	5.82711	5.42701	5.06724	5.18534	6.21502	4.44076	9.52735	4.92764	5.82711	5.42701	5.06724	5.18534	6.21502	4.44076	931.423	29.5719	57.1303	43.8237	34.6593	35.7396	77.3463	19.5604	26987	859	1921	1278	1111	1052	1757	518
F36A2.12	WBGene00009459	Uncharacterized protein	24.2059	-1.05579	-1.15575	1.61205	1.01187	-1.308	-1.12607	5.19183	0.594548	0.516225	0.385712	1.28344	0.611574	0.207186	0.423245	5.19183	0.594548	0.516225	0.385712	1.28344	0.611574	0.207186	0.423245	28.891	0.449772	0.437981	0.297712	1.4099	0.463038	0.191931	0.306281	379	6	7	4	21	7	2	4
pmp-5	WBGene00004062	Peroxisomal Membrane Protein related	23.9235	2.86242	2.11414	1.61541	1.31494	-1.09704	-1.32202	7.44372	2.86336	4.3806	3.94344	3.55527	3.25836	2.72974	2.46061	7.44372	2.86336	4.3806	3.94344	3.55527	3.25836	2.72974	2.46061	144.834	5.91694	19.8656	14.3782	10.7933	7.72563	6.01683	4.00799	12085	491	1921	1205	995	651	394	306
Y47D3A.13	WBGene00012926	Uncharacterized protein	23.9146	1.02323	-1.67396	-2.13622	-1.37994	-1.41924	-1.92226	5.91621	1.33639	1.36953	0.593123	0.24133	0.871786	0.831274	0.393592	5.91621	1.33639	1.36953	0.593123	0.24133	0.871786	0.831274	0.393592	42.268	1.37887	1.49228	0.491589	0.188688	0.729393	0.87749	0.278874	807	27	34	10	4	15	14	5
ZK354.2	WBGene00022705	Uncharacterized protein	23.808	1.20176	1.16705	1.34899	1.2744	-1.06907	1.22679	4.8103	0.236923	0.502075	0.459796	0.668798	0.586745	0.140568	0.531814	4.8103	0.236923	0.502075	0.459796	0.668798	0.586745	0.140568	0.531814	24.2595	0.163576	0.423681	0.368708	0.576987	0.441811	0.131307	0.396866	1404	10	30	21	39	28	7	23
sri-40	WBGene00005552	Serpentine Receptor, class I	23.6485	-1.23551	-1.04883	-1.46485	-1.12242	1.25375	-1.64441	5.7205	1.15683	0.851717	1.08805	0.606073	0.990217	1.48308	0.439261	5.7205	1.15683	0.851717	1.08805	0.606073	0.990217	1.48308	0.439261	37.986	1.11223	0.776701	1.06655	0.518439	0.842773	1.93579	0.317066	1699	50	41	48	26	39	68	13	Enriched in germline (WormBase)
Y37E11B.10	WBGene00021381	Uncharacterized protein	22.9734	-1.03902	-1.04909	-1.08666	-1.04954	-1.00111	-1.12425	4.73782	0.215923	0.160698	0.146788	0.0960229	0.146166	0.214322	0.0469634	4.73782	0.215923	0.160698	0.146788	0.0960229	0.146166	0.214322	0.0469634	23.4457	0.149696	0.128982	0.108556	0.074084	0.094367	0.197988	0.029882	1678	11	12	9	6	8	12	2
T23E7.2	WBGene00020732	Uncharacterized protein	22.6915	1.19223	-1.00746	-1.35584	-1.32743	1.01414	-1.09255	7.14613	2.64205	2.89572	2.63133	2.20287	2.23342	2.66231	2.51436	7.14613	2.64205	2.89572	2.63133	2.20287	2.23342	2.66231	2.51436	106.963	4.85691	6.09933	4.99207	3.63663	3.16231	5.72168	4.20133	7926	397	502	389	307	246	345	292
col-168	WBGene00000741	COLlagen	22.2218	1.04992	1.00947	1.00701	-1.0441	1.0292	-1.05281	5.55778	1.08387	1.15415	1.09747	1.09394	1.02161	1.1254	1.00963	5.55778	1.08387	1.15415	1.09747	1.09394	1.02161	1.1254	1.00963	34.7342	1.01469	1.1654	1.07867	1.1363	0.882421	1.31416	0.896475	1462	43	57	46	53	38	44	35
nlp-26	WBGene00003764	Neuropeptide-Like Protein	21.9868	2.73411	1.73433	1.64463	1.84283	1.34081	1.23028	6.59125	2.13268	3.58375	2.92706	2.85044	3.01461	2.55578	2.43167	6.59125	2.13268	3.58375	2.92706	2.85044	3.01461	2.55578	2.43167	65.8897	3.02769	10.7887	6.35168	6.2283	6.22717	5.2374	3.88632	836	39	159	81	88	81	53	46
K01D12.7	WBGene00010466	Uncharacterized protein	21.6003	1.4403	1.16034	1.38397	1.25728	-1.37098	1.21406	5.48954	1.05656	1.58293	1.27111	1.52537	1.38686	0.60135	1.33639	5.48954	1.05656	1.58293	1.27111	1.52537	1.38686	0.60135	1.33639	33.5201	0.976012	1.88769	1.32027	1.84742	1.37401	0.612227	1.33287	397	12	26	16	25	17	6	15
catp-4	WBGene00007248	Sodium/potassium-transporting ATPase subunit alpha	20.9622	-1.01366	1.02286	-1.11999	-1.04939	-1.00883	-1.17531	4.65345	0.263732	0.244155	0.296346	0.10024	0.194176	0.251056	0.0306868	4.65345	0.263732	0.244155	0.296346	0.10024	0.194176	0.251056	0.0306868	22.534	0.181713	0.190854	0.228701	0.078418	0.132033	0.233255	0.018745	3190	26	32	33	13	19	26	3	Expressed in sperm (CenGen)
col-144	WBGene00000717	COLlagen	20.9416	1.01916	-1.40975	-1.29532	-1.15433	-1.04868	-1.96809	6.03836	1.65006	1.67743	1.15462	1.27675	1.443	1.58148	0.673259	6.03836	1.65006	1.67743	1.15462	1.27675	1.443	1.58148	0.673259	45.4668	1.90472	2.08303	1.16444	1.39939	1.45807	2.14751	0.516549	1869	79	100	49	64	61	70	20
col-10	WBGene00000599	Cuticle collagen 10	20.9026	1.3499	-1.0991	1.01139	1.2873	1.35161	-1.58411	5.87133	1.48572	1.91857	1.34939	1.50206	1.85007	1.92039	0.82204	5.87133	1.48572	1.91857	1.34939	1.50206	1.85007	1.92039	0.82204	41.26	1.60376	2.62151	1.4476	1.80698	2.24469	3.02623	0.673316	1696	67	125	60	83	94	98	26
C10C5.3	WBGene00007507	Aminoacylase-1	20.7544	2.6495	2.33335	3.21646	1.91561	3.19098	2.12932	6.68925	2.3139	3.71962	3.53631	3.99938	3.25171	3.9879	3.4043	6.68925	2.3139	3.71962	3.53631	3.99938	3.25171	3.9879	3.4043	71.2331	3.63161	11.9546	10.4218	15.208	7.69151	15.5684	8.5161	3969	203	773	585	937	436	681	434
W03D8.8	WBGene00020989	Uncharacterized protein	20.5946	1.33888	1.74018	-1.24036	1.19831	1.04959	-1.32427	5.21369	0.849496	1.27052	1.64874	0.538734	1.11049	0.919316	0.444299	5.21369	0.849496	1.27052	1.64874	0.538734	1.11049	0.919316	0.444299	29.1837	0.719905	1.34428	2.04235	0.450427	0.990553	0.999129	0.321549	1753	44	94	124	30	61	48	18
sams-1	WBGene00008205	Probable S-adenosylmethionine synthase 1	20.4232	2.19291	1.58634	-1.0585	1.60295	1.55438	-2.57228	8.08425	3.73211	4.86496	4.39781	3.65009	4.41284	4.36844	2.36906	8.08425	3.73211	4.86496	4.39781	3.65009	4.41284	4.36844	2.36906	268.202	12.2781	28.6243	20.3697	11.7013	19.7194	20.4664	3.68162	15093	693	1869	1153	728	1128	903	190	Expressed in epidermis (CEnGEn)
unc-52	WBGene00006787	Basement membrane proteoglycan	20.1126	1.23228	1.26883	-1.07209	1.43096	1.16095	-1.36076	7.17296	2.84293	3.14426	3.18643	2.74251	3.35992	3.05824	2.39852	7.17296	2.84293	3.14426	3.18643	2.74251	3.35992	3.05824	2.39852	110.3	5.78039	7.5527	7.81143	5.66681	8.38851	7.79509	3.77548	15482	1072	1696	1160	952	1306	945	686
F42G10.1	WBGene00009645	Uncharacterized protein	20.0465	1.44268	1.33538	1.19883	-1.05819	1.10274	1.14	5.26805	0.942773	1.47152	1.36002	1.2044	0.861179	1.08387	1.13181	5.26805	0.942773	1.47152	1.36002	1.2044	0.861179	1.08387	1.13181	29.7846	0.827962	1.67198	1.46999	1.29045	0.714566	1.23407	1.04093	2440	68	159	122	117	60	80	78
ugt-47	WBGene00011006	Putative UDP-glucuronosyltransferase ugt-47	19.7882	1.38	1.54135	1.09621	1.53325	1.52018	1.06079	6.90737	2.60081	3.06548	3.225	2.73334	3.2174	3.20504	2.68595	6.90737	2.60081	3.06548	3.225	2.73334	3.2174	3.20504	2.68595	85.2866	4.66838	7.08827	8.04286	5.62187	7.5283	8.72707	4.83854	6380	350	616	606	465	573	512	331
C28D4.7	WBGene00007794	Uncharacterized protein	19.4568	-1.05341	-1.11072	1.16368	1.23123	-1.01271	1.02896	4.80825	0.526041	0.45098	0.374549	0.744732	0.826139	0.507824	0.567227	4.80825	0.526041	0.45098	0.374549	0.744732	0.826139	0.507824	0.567227	24.2469	0.38481	0.374423	0.288171	0.661944	0.678775	0.499745	0.428347	1149	19	21	14	35	33	19	19
col-3	WBGene00000594	COLlagen	19.3367	1.09073	-1.17114	1.03192	-1.24008	-1.14722	-1.04198	7.27695	3.00367	3.12897	2.77576	3.04901	2.69324	2.80553	2.94435	7.27695	3.00367	3.12897	2.77576	3.04901	2.69324	2.80553	2.94435	122.012	6.70061	7.4816	5.60932	7.33573	4.76371	6.38609	5.91341	5099	281	363	236	339	203	210	226
col-96	WBGene00000671	COLlagen	19.258	-1.04255	1.12052	-1.21116	-1.27061	-1.33627	-1.75358	6.10685	1.83946	1.77935	2.00363	1.56307	1.49394	1.42125	1.02916	6.10685	1.83946	1.77935	2.00363	1.56307	1.49394	1.42125	1.02916	47.4754	2.29078	2.28097	2.86649	1.92491	1.55662	1.82666	0.916572	1918	93	107	117	86	64	58	34
col-117	WBGene00000691	COLlagen	19.1346	1.06926	-1.21294	-1.01337	-1.26499	-1.1301	-1.07746	7.29946	3.04135	3.13797	2.76284	3.0222	2.70223	2.8649	2.93371	7.29946	3.04135	3.13797	2.76284	3.0222	2.70223	2.8649	2.93371	124.23	6.93068	7.51876	5.5363	7.20498	4.81036	6.76475	5.8745	5192	291	365	233	333	205	222	225
col-118	WBGene00000692	COLlagen	19.1333	1.17336	1.08814	-1.11954	-1.0012	-1.18293	-1.05216	6.5528	2.29479	2.52543	2.41665	2.13187	2.29305	2.05242	2.22143	6.5528	2.29479	2.52543	2.41665	2.13187	2.29305	2.05242	2.22143	64.1513	3.55995	4.5513	4.11601	3.41675	3.33728	3.40708	3.24513	2657	149	220	171	157	141	111	124
W01B6.2	WBGene00012169	Uncharacterized protein	19.1188	1.01819	1.15366	1.08552	-1.06022	1.12366	-1.05291	4.40371	0.146788	0.172789	0.353008	0.265176	0.0624272	0.314994	0.0723987	4.40371	0.146788	0.172789	0.353008	0.265176	0.0624272	0.314994	0.0723987	20.069	0.097611	0.134717	0.272278	0.212186	0.038516	0.299403	0.042829	1026	6	8	14	12	3	13	3
C55B7.3	WBGene00016942	Protein-tyrosine-phosphatase	18.5654	1.26961	1.43454	1.52218	1.35699	1.07766	1.10618	4.5467	0.332158	0.67654	0.852745	0.938293	0.772563	0.440066	0.477746	4.5467	0.332158	0.67654	0.852745	0.938293	0.772563	0.440066	0.477746	21.5656	0.234993	0.598262	0.772721	0.8934	0.62233	0.428396	0.352701	1043	12	34	38	48	31	17	16	Expressed in sperm (CenGen)
ZK1321.4	WBGene00014262	Uncharacterized protein	18.4934	-1.0318	-1.12371	-1.34112	-1.40802	-1.21698	-1.37571	6.78529	2.57635	2.53118	2.40809	2.15291	2.08269	2.29305	2.11618	6.78529	2.57635	2.53118	2.40809	2.15291	2.08269	2.29305	2.11618	77.8015	4.58162	4.58536	4.08065	3.47933	2.7508	4.2283	2.94614	4606	273	316	244	229	166	197	161
K09E4.1	WBGene00010719	Uncharacterized protein	18.4113	1.33797	-1.18778	1.00933	1.00125	-1.06131	1.15584	4.77106	0.568543	0.988589	0.320271	0.58194	0.57034	0.482698	0.777485	4.77106	0.568543	0.988589	0.320271	0.58194	0.57034	0.482698	0.777485	23.8278	0.426831	0.940953	0.246766	0.493289	0.428037	0.472766	0.62736	1222	22	56	13	28	23	20	30
cyn-2	WBGene00000878	Peptidyl-prolyl cis-trans isomerase 2	18.3767	-1.38379	-1.33272	-1.28427	-1.32121	-1.67993	-1.19661	7.05322	2.85341	2.38479	2.43903	2.49246	2.45155	2.10501	2.59446	7.05322	2.85341	2.38479	2.43903	2.49246	2.45155	2.10501	2.59446	97.2927	5.82218	4.00136	4.20257	4.62357	3.82688	3.57402	4.48746	2345	141	112	102	124	94	68	99	Expressed in sperm (CenGen)
tnt-2	WBGene00006587	TropoNin T	18.2329	1.23918	-1.29788	-1.36099	-1.612	-1.05834	-1.24552	8.54622	4.35775	4.66714	3.98159	3.9131	3.6689	4.27595	4.04101	8.54622	4.35775	4.66714	3.98159	3.9131	3.6689	4.27595	4.04101	425.747	19.5005	24.6146	14.8419	14.2981	10.8111	19.1204	14.2594	25442	1168	1443	891	944	656	767	669	Expressed in muscle (CenGen)
T28D6.3	WBGene00012123	Uncharacterized protein	18.198	1.057	-1.30672	-1.58656	-1.22812	-1.3562	-1.13613	5.67435	1.48864	1.56862	1.1027	0.822743	1.19219	1.04907	1.30451	5.67435	1.48864	1.56862	1.1027	0.822743	1.19219	1.04907	1.30451	36.9752	1.60634	1.85871	1.08573	0.744545	1.09765	1.18608	1.281	624	28	37	19	14	19	16	20
F52H3.6	WBGene00009948	Serine/threonine-protein phosphatase	18.1978	-1.15106	1.03491	1.22177	-1.34651	-1.30603	1.43822	5.54939	1.3637	1.16073	1.4132	1.65267	0.934469	0.978504	1.88798	5.54939	1.3637	1.16073	1.4132	1.65267	0.934469	0.978504	1.88798	34.6204	1.41638	1.17926	1.56757	2.10079	0.790526	1.07914	2.37562	1592	66	63	73	107	37	39	100	Expressed in sperm (CenGen)
C18B2.3	WBGene00015954	Uncharacterized protein	18.1683	-1.05292	1.1629	1.26428	1.04667	1.14377	-1.28894	5.6845	1.50114	1.42675	1.71887	1.83946	1.56696	1.69494	1.13495	5.6845	1.50114	1.42675	1.71887	1.83946	1.56696	1.69494	1.13495	37.168	1.63155	1.60246	2.18836	2.54204	1.67088	2.38013	1.04406	1228	54	62	73	93	57	62	32
F32B5.1	WBGene00017975	Uncharacterized protein	17.8428	1.06633	1.14388	-1.10923	1.01104	-1.17419	-1.20601	6.47734	2.32007	2.41272	2.51401	2.17051	2.33592	2.0884	2.04983	6.47734	2.32007	2.41272	2.51401	2.17051	2.33592	2.0884	2.04983	60.6705	3.64708	4.0974	4.50022	3.54994	3.45587	3.52899	2.7876	3618	218	284	270	234	210	165	152
Y39G10AR.16	WBGene00021472	Uncharacterized protein	17.4451	1.27151	-1.03457	1.02935	-1.08228	1.19472	1.22507	4.67363	0.548881	0.895423	0.499852	0.590617	0.434806	0.80555	0.841746	4.67363	0.548881	0.895423	0.499852	0.590617	0.434806	0.80555	0.841746	22.7484	0.4082	0.825198	0.406967	0.504279	0.314896	0.847082	0.695189	723	13	31	14	18	11	22	21
aqp-7	WBGene00000175	AQuaPorin or aquaglyceroporin related	17.1302	1.69174	1.31042	1.06261	1.60212	2.22679	1.1396	8.06957	3.97109	4.72961	4.36112	4.0587	4.65108	5.12606	4.15962	8.06957	3.97109	4.72961	4.36112	4.0587	4.65108	5.12606	4.15962	264.707	14.5968	25.7807	19.8321	15.8593	23.6129	36.1125	15.6994	10767	595	1217	812	714	976	1152	584
col-119	WBGene00000693	COLlagen	17.014	3.19878	2.16935	-1.09455	1.69651	1.1921	-2.41158	10.9221	6.8334	8.51092	7.95066	6.70305	7.59597	7.08691	5.56342	10.9221	6.8334	8.51092	7.95066	6.70305	7.59597	7.08691	5.56342	3039.06	115.002	369.631	246.664	113.758	195.066	139.286	47.4503	122764	4655	17324	10022	5080	8004	4412	1751
C08F11.10	WBGene00007457	Uncharacterized protein	16.5039	-1.03599	-1.01206	1.05373	-1.07403	1.03435	-1.09946	4.27595	0.23122	0.180205	0.213924	0.30673	0.128191	0.279948	0.0944259	4.27595	0.23122	0.180205	0.213924	0.30673	0.128191	0.279948	0.0944259	18.8845	0.159744	0.139133	0.163456	0.247153	0.080927	0.261601	0.057394	690	6	6	6	10	3	8	2
cpr-5	WBGene00000785	Cathepsin B-like cysteine proteinase 5	16.4604	48.273	56.4886	30.5878	32.7809	41.6119	43.6121	8.05256	4.01163	9.60477	9.83152	8.94651	9.04641	9.39056	9.45829	8.05256	4.01163	9.60477	9.83152	8.94651	9.04641	9.39056	9.45829	258.971	15.0459	790.239	839.707	480.371	492.827	623.105	678.27	12446	725	44060	40588	25518	24057	23477	29776
K07A1.5	WBGene00010612	Uncharacterized protein	16.2736	-1.02686	-1.05777	-1.05114	-1.07139	-1.0078	-1.08802	4.23445	0.209994	0.171757	0.128971	0.138035	0.11051	0.198785	0.0882866	4.23445	0.209994	0.171757	0.128971	0.138035	0.11051	0.198785	0.0882866	18.367	0.144741	0.133979	0.096129	0.108659	0.069741	0.184985	0.052923	760	7	7	4	5	3	7	3
unc-54	WBGene00006789	Myosin-4	16.2502	1.0799	-1.00363	-1.17146	-1.32113	-1.11935	-1.06876	8.55409	4.53171	4.64261	4.52648	4.3034	4.12994	4.36904	4.43577	8.55409	4.53171	4.64261	4.52648	4.3034	4.12994	4.36904	4.43577	427.593	22.0943	24.1164	22.4711	19.136	15.7757	20.4766	19.5221	116978	6057	7655	6184	5787	4384	4392	4879
ifc-1	WBGene00002055	Intermediate filament protein ifc-1	16.1246	-1.00551	-1.21596	1.24144	1.11722	-1.01676	-1.05119	4.56952	0.558328	0.550395	0.276233	0.870341	0.718244	0.534345	0.486309	4.56952	0.558328	0.550395	0.276233	0.870341	0.718244	0.534345	0.486309	21.7809	0.415792	0.469088	0.2137	0.803479	0.568626	0.529488	0.360616	1520	30	38	15	62	41	29	23
clec-73	WBGene00021579	C-type LECtin	16.0473	-1.05568	-1.2029	-1.2359	-1.29316	-1.24471	-1.12851	4.45394	0.449684	0.371517	0.183162	0.144124	0.0787779	0.13387	0.275259	4.45394	0.449684	0.371517	0.183162	0.144124	0.0787779	0.13387	0.275259	20.6274	0.320567	0.305008	0.13547	0.112476	0.04879	0.12453	0.190357	1661	26	29	11	11	4	8	15	Expressed in sperm (CenGen)
fbxa-72	WBGene00017962	F-box A protein	15.9023	-1.05584	-1.21115	-2.73673	-1.48845	-2.11552	-3.16577	6.08282	2.09166	2.01327	1.81529	0.639211	1.51785	1.01065	0.429105	6.08282	2.09166	2.01327	1.81529	0.639211	1.51785	1.01065	0.429105	46.7446	2.90894	2.87538	2.41187	0.549268	1.59359	1.12382	0.312531	2087	128	143	110	31	74	38	15	Expressed in epidermis (CEnGEn)
dim-1	WBGene00001000	Disorganized muscle protein 1	15.8227	1.1352	-1.122	-1.13379	-1.21706	1.11626	-1.19151	8.14774	4.16382	4.34677	3.99775	3.98267	3.88042	4.3225	3.91103	8.14774	4.16382	4.34677	3.99775	3.98267	3.88042	4.3225	3.91103	286.521	17.0137	19.4632	15.0259	15.0563	12.914	19.8266	12.8378	13383	885	1125	767	866	672	784	632
F40A3.6	WBGene00018221	Uncharacterized protein	15.7273	-1.0251	1.02255	-1.1718	-1.10062	1.20622	-1.06599	5.65565	1.68045	1.64469	1.71262	1.45172	1.54214	1.95094	1.58825	5.65565	1.68045	1.64469	1.71262	1.45172	1.54214	1.95094	1.58825	36.7012	1.96652	2.0156	2.16755	1.7089	1.63513	3.10767	1.79809	1325	72	85	79	69	60	88	60
C10C5.4	WBGene00007508	Aminoacylase-1	15.6206	1.55065	1.39012	1.84041	1.30921	2.15375	1.48558	6.88651	2.92113	3.554	3.39634	3.80115	3.30983	4.02798	3.49216	6.88651	2.92113	3.554	3.39634	3.80115	3.30983	4.02798	3.49216	83.4762	6.25553	10.5144	9.27781	13.2158	8.07164	15.9953	9.09749	4628	348	677	518	810	455	696	461	Expressed in reproductive (CenGen)
gcsh-1	WBGene00008354	Glycine Cleavage System H protein	15.6085	1.37928	1.56232	-1.10266	1.36579	-1.03444	-1.03515	6.94116	2.97689	3.44081	3.62058	2.8359	3.42663	2.92804	2.92706	6.94116	2.97689	3.44081	3.62058	2.8359	3.42663	2.92804	2.92706	87.7241	6.55931	9.67085	11.0683	6.15765	8.83821	7.08736	5.85	1821	137	233	232	142	187	116	111
D2092.4	WBGene00017065	Uncharacterized protein	15.2744	-1.23154	1.01463	-1.22719	-1.20932	-1.62644	-1.22456	5.96037	2.02732	1.72686	2.04828	1.73196	1.75312	1.3256	1.73506	5.96037	2.02732	1.72686	2.04828	1.73196	1.75312	1.3256	1.73506	43.358	2.73849	2.1909	2.9848	2.28226	2.03788	1.67722	2.07784	2199	140	129	153	128	105	67	97
C14F11.4	WBGene00015780	Uncharacterized protein	15.2133	1.10219	1.17975	-1.09403	1.28952	-1.08874	-1.24369	6.59626	2.66899	2.80937	2.90747	2.53934	3.03582	2.54633	2.35437	6.59626	2.66899	2.80937	2.90747	2.53934	3.03582	2.54633	2.35437	66.1775	4.98421	5.68797	6.26881	4.78823	6.32917	5.19686	3.64423	3544	268	354	339	284	345	219	179
gska-3	WBGene00007977	Glycogen Synthase Kinase Alpha subunit	14.9179	-1.43672	-1.22963	-1.34014	-1.37439	-1.0763	-1.41892	4.65666	0.757694	0.234911	0.459466	0.335311	0.298903	0.651618	0.252904	4.65666	0.757694	0.234911	0.459466	0.335311	0.298903	0.651618	0.252904	22.5758	0.617765	0.184195	0.368701	0.27203	0.203336	0.667118	0.174437	1202	33	12	20	16	11	28	9
C24A11.1	WBGene00016040	Uncharacterized protein	14.7935	-1.12239	-1.08457	-1.09072	1.10884	-1.28809	1.06762	4.44229	0.555398	0.388828	0.438277	0.430121	0.704453	0.190166	0.649796	4.44229	0.555398	0.388828	0.438277	0.430121	0.704453	0.190166	0.649796	20.4378	0.413742	0.31538	0.351605	0.360483	0.557057	0.178269	0.497494	578	12	11	10	12	16	4	13
pept-1	WBGene00003877	Peptide transporter family 1	14.7467	1.78358	1.44438	-1.21652	2.38575	1.67308	-1.59399	6.87139	2.98907	3.82384	3.51952	2.70631	4.24351	3.73157	2.31642	6.87139	2.98907	3.82384	3.51952	2.70631	4.24351	3.73157	2.31642	82.7243	6.61569	13.0583	10.3371	5.48569	17.1647	12.8642	3.52742	9634	772	1765	1211	707	2031	1175	376
haao-1	WBGene00010595	3-hydroxyanthranilate 3,4-dioxygenase	14.5658	2.39466	2.60505	1.89606	1.54199	1.90001	1.19699	5.53221	1.6677	2.92752	3.04901	2.5907	2.29249	2.5937	1.9271	5.53221	1.6677	2.92752	3.04901	2.5907	2.29249	2.5937	1.9271	34.3394	1.93719	6.28924	7.0624	4.96201	3.33482	5.44624	2.46129	1349	77	287	280	216	134	168	89
fmo-1	WBGene00001476	Dimethylaniline monooxygenase [N-oxide-forming]	14.353	-1.73913	-1.50025	1.1202	-1.88302	1.01908	-1.20125	5.44518	1.6019	0.803531	1.01669	1.76565	0.688853	1.62917	1.33736	5.44518	1.6019	0.803531	1.01669	1.76565	0.688853	1.62917	1.33736	32.7295	1.80624	0.728986	0.96515	2.36624	0.541993	2.2329	1.33548	2435	135	63	73	195	41	131	91
nspa-8	WBGene00012294	Nematode Specific Peptide family, group A	14.2627	1.65139	-1.49809	-1.80636	-1.35853	-1.99095	1.30848	6.52091	2.68674	3.41042	2.10362	1.83366	2.24469	1.69328	3.07463	6.52091	2.68674	3.41042	2.10362	1.83366	2.24469	1.69328	3.07463	62.6332	5.07437	9.47859	3.13165	2.53082	3.19161	2.37272	6.56919	306	25	54	16	14	16	10	30
Y47G6A.33	WBGene00045399	Uncharacterized protein	14.2363	1.86262	1.21551	-1.10537	-1.00703	-1.37337	-1.44232	7.90495	4.07345	4.97078	4.35501	3.92892	4.06334	3.61573	3.54505	7.90495	4.07345	4.97078	4.35501	3.92892	4.06334	3.61573	3.54505	223.492	16.0048	30.7556	19.7317	14.4593	14.9571	11.9319	9.55848	3518	253	562	313	252	240	148	138
F53F1.4	WBGene00009982	Uncharacterized protein	14.2309	3.41435	3.51672	4.61786	2.7754	6.79394	4.58835	5.48871	1.65775	3.42936	3.47198	3.86498	3.13045	4.422	3.85573	5.48871	1.65775	3.42936	3.47198	3.86498	3.13045	4.422	3.85573	33.5056	1.92133	9.6325	9.91168	13.8903	6.95411	21.4062	12.2745	495	29	166	148	227	105	248	166
spe-46	WBGene00012296	Uncharacterized protein	13.9686	-1.11191	-1.2752	-1.03391	-1.01323	-1.18797	-1.13979	4.22103	0.416913	0.263879	0.0661844	0.368806	0.397957	0.16842	0.228148	4.22103	0.416913	0.263879	0.0661844	0.368806	0.397957	0.16842	0.228148	18.2507	0.292805	0.212638	0.049056	0.304726	0.285438	0.157332	0.158298	740	12	10	2	14	12	5	6
T05E12.6	WBGene00011487	Uncharacterized protein	13.9017	1.6045	1.61301	1.1821	-1.05421	-1.10587	-2.27765	7.57971	3.78252	4.46464	4.47228	4.02387	3.70635	3.63733	2.59497	7.57971	3.78252	4.46464	4.47228	4.02387	3.70635	3.63733	2.59497	166.615	12.7448	21.2038	21.6937	15.4091	11.1921	12.1114	4.48982	11301	869	1673	1484	1158	773	646	279
Y47G6A.19	WBGene00021645	Uncharacterized protein	13.9	1.23962	-1.29763	-1.18259	1.1618	-1.25487	-1.5474	5.00003	1.20301	1.51291	0.82714	0.961067	1.41938	0.875478	0.573168	5.00003	1.20301	1.51291	0.82714	0.961067	1.41938	0.875478	0.573168	26.6701	1.17386	1.75175	0.746258	0.928981	1.41971	0.939418	0.433875	1882	84	144	54	73	102	53	28
ZK688.10	WBGene00044447	Uncharacterized protein	13.7775	1.14745	-1.0699	1.31024	1.28824	1.02508	1.13039	3.94036	0.156117	0.354547	0.0586443	0.545952	0.521522	0.191847	0.332934	3.94036	0.156117	0.354547	0.0586443	0.545952	0.521522	0.191847	0.332934	15.7894	0.104976	0.288373	0.044524	0.456234	0.386716	0.179707	0.228876	601	4	13	2	20	15	6	8
C07G1.6	WBGene00015572	Uncharacterized protein	13.7429	2.79297	4.4038	3.89609	3.98485	7.46915	4.5892	4.12729	0.346673	1.82848	2.48542	2.3087	2.3412	3.24762	2.54492	4.12729	0.346673	1.82848	2.48542	2.3087	2.3412	3.24762	2.54492	17.5361	0.246448	2.38503	4.39144	3.96542	3.47453	8.99755	4.31363	521	8	83	132	131	105	210	117
W10C8.5	WBGene00021128	Uncharacterized protein	13.5422	1.09986	1.05684	-1.11877	1.02223	-1.04726	-1.07716	7.21651	3.45712	3.59444	3.53688	3.29521	3.48885	3.3905	3.34989	7.21651	3.45712	3.59444	3.53688	3.29521	3.48885	3.3905	3.34989	115.023	9.85494	10.9094	10.4269	8.85354	9.36849	10.0908	8.17046	6409	551	706	585	546	531	441	416
clik-1	WBGene00020808	CaLponIn-liKe proteins	13.4901	1.11876	-1.04658	-1.09566	-1.29441	-1.02899	-1.06527	9.28353	5.52971	5.69161	5.46403	5.3979	5.15741	5.48847	5.43848	9.28353	5.52971	5.69161	5.46403	5.3979	5.15741	5.48847	5.43848	804.908	46.1968	51.9464	45.0311	44.2539	34.8737	45.947	43.3618	45424	2614	3400	2555	2761	1982	2025	2228
aqp-8	WBGene00000176	AQuaPorin or aquaglyceroporin related	13.4543	1.74209	1.49386	1.02889	1.62806	2.68974	1.3373	5.13458	1.38459	2.18541	1.96363	1.42568	2.08774	2.81206	1.80391	5.13458	1.38459	2.18541	1.96363	1.42568	2.08774	2.81206	1.80391	28.2284	1.44806	3.35975	2.76536	1.65086	2.77002	6.42815	2.21242	1144	59	159	113	76	114	206	82
col-135	WBGene00000708	COLlagen	13.3228	-1.52215	-1.48522	-1.8753	-1.51989	-1.85029	-1.87295	4.82292	1.0871	0.480991	0.516421	0.179974	0.483126	0.199349	0.181788	4.82292	1.0871	0.480991	0.516421	0.179974	0.483126	0.199349	0.181788	24.4118	1.01752	0.403128	0.420273	0.139309	0.34999	0.185436	0.118778	2184	87	42	39	15	33	14	10
M70.3	WBGene00019785	Uncharacterized protein	13.2374	1.03229	1.01002	1.02191	1.0192	-1.01285	-1.00062	3.78579	0.0592352	0.105088	0.0736182	0.0905067	0.0866788	0.0408191	0.0583446	3.78579	0.0592352	0.105088	0.0736182	0.0905067	0.0866788	0.0408191	0.0583446	14.4512	0.039108	0.087717	0.054545	0.070096	0.05401	0.039887	0.034319	1815	5	13	7	10	7	4	4
ttr-31	WBGene00010225	TransThyretin-Related family domain	13.2256	1.11948	1.22704	1.27101	1.22022	1.11948	-1.17326	5.9261	2.20083	2.36366	2.49601	2.54681	2.48798	2.36366	1.97032	5.9261	2.20083	2.36366	2.49601	2.54681	2.48798	2.36366	1.97032	42.4782	3.23312	3.94687	4.4218	4.81935	3.97412	4.51539	2.5772	882	68	96	93	111	84	74	49
F53G12.8	WBGene00018773	Uncharacterized protein	13.0307	1.0581	-1.14837	-1.08014	1.00998	-1.43354	1.1106	4.51665	0.812814	0.894291	0.613222	0.701598	0.82714	0.293231	0.964159	4.51665	0.812814	0.894291	0.613222	0.701598	0.82714	0.293231	0.964159	21.3164	0.677888	0.825014	0.50977	0.610425	0.680339	0.274529	0.838446	529	17	24	13	17	18	6	19
ifb-2	WBGene00002054	Intermediate Filament, B	12.8302	2.44984	2.6384	1.64909	2.87517	2.19894	1.69726	7.34966	3.66819	4.96087	5.06785	4.38986	5.19183	4.805	4.4314	7.34966	3.66819	4.96087	5.06785	4.38986	5.19183	4.805	4.4314	131.014	11.7468	30.5551	33.4499	20.4342	35.9855	28.4347	19.4265	9766	886	2646	2512	1693	2749	1665	1332
C45B2.1	WBGene00016658	Uncharacterized protein	12.8066	-1.99555	-1.64276	-1.6755	-2.16096	-5.11124	-1.69704	8.70358	5.02477	4.02798	4.30865	4.28017	3.9131	2.6711	4.26174	8.70358	5.02477	4.02798	4.30865	4.28017	3.9131	2.6711	4.26174	499.507	32.3279	15.1769	18.9677	18.8196	13.2565	5.75429	17.0736	7097	461	251	272	296	192	65	222
C06A1.3	WBGene00007354	Putative serine/threonine-protein phosphatase C06A1.3	12.7191	1.01191	1.05579	-1.14098	1.2108	-1.01606	1.09482	3.9874	0.318468	0.335542	0.396785	0.128191	0.59443	0.295478	0.449164	3.9874	0.318468	0.335542	0.396785	0.128191	0.59443	0.295478	0.449164	16.2039	0.224368	0.272361	0.31017	0.100251	0.448947	0.275708	0.32654	824	12	17	16	6	24	11	16
nhr-114	WBGene00003704	Non-coding transcript of protein-coding gene nhr-114	12.7034	1.72714	1.58543	1.28678	1.01238	1.33929	-1.23534	6.17123	2.50409	3.29247	3.16897	2.86786	2.52184	2.92556	2.19918	6.17123	2.50409	3.29247	3.16897	2.86786	2.52184	2.92556	2.19918	49.2263	4.30018	8.65904	7.6825	6.30551	4.08022	7.07973	3.18729	2933	261	601	453	413	250	327	175
acs-10	WBGene00007082	fatty Acid CoA Synthetase family	12.6616	-1.04547	-1.01016	-1.05822	1.12712	-1.02144	-1.06555	3.846	0.183615	0.119467	0.169038	0.101976	0.35626	0.153016	0.0920236	3.846	0.183615	0.119467	0.169038	0.101976	0.35626	0.153016	0.0920236	14.9652	0.126236	0.098219	0.125883	0.080182	0.2493	0.145345	0.055305	1182	10	10	10	8	21	10	4
csq-1	WBGene00000822	Calsequestrin	12.6278	-1.07355	1.09799	1.00971	-1.46041	1.17751	-1.13841	7.61534	3.9568	3.85441	4.09166	3.97075	3.41042	4.19254	3.76978	7.61534	3.9568	3.85441	4.09166	3.97075	3.41042	4.19254	3.76978	171.595	14.4048	13.3976	16.1074	14.9388	8.7594	18.0272	11.4976	9992	841	906	944	962	519	823	612
alg-3	WBGene00011910	Argonaute (plant)-Like Gene	12.6182	-1.07566	1.00256	1.01749	1.01669	1.34363	-1.04632	3.8792	0.221759	0.116534	0.225454	0.246772	0.245636	0.6479	0.156428	3.8792	0.221759	0.116534	0.225454	0.246772	0.245636	0.6479	0.156428	15.2206	0.152145	0.095387	0.172102	0.194858	0.166296	0.662046	0.099234	2194	22	16	25	32	25	76	14
Y50D4B.4	WBGene00021743	Uncharacterized protein	12.6113	1.82813	1.63767	-1.14088	1.44117	1.32971	-1.44521	4.92827	1.27163	2.142	1.98327	1.08149	1.79887	1.68273	0.740349	4.92827	1.27163	2.142	1.98327	1.08149	1.79887	1.68273	0.740349	25.7977	1.27423	3.23863	2.81348	1.11587	2.13699	2.35669	0.588829	2597	123	351	266	128	186	155	57
C29F7.2	WBGene00007811	Uncharacterized protein	12.5545	1.0296	1.05208	1.61856	-1.65416	1.65123	1.52031	6.45465	2.80451	2.84659	2.87776	3.49923	2.07842	3.52805	3.40888	6.45465	2.80451	2.84659	2.87776	3.49923	2.07842	3.52805	3.40888	59.5664	5.60362	5.85611	6.13901	10.3635	2.73983	11.2292	8.56413	2710	259	307	278	519	151	393	355
pho-1	WBGene00004020	Intestinal acid phosphatase	12.5279	1.82791	2.06125	-1.23418	1.41253	1.32088	-1.28255	6.8795	3.23243	4.10262	4.27595	2.92889	3.73072	3.63394	2.87342	6.8795	3.23243	4.10262	4.27595	2.92889	3.73072	3.63394	2.87342	83.1198	8.10118	16.0678	18.4808	6.64161	11.3745	12.0965	5.64163	5211	509	1169	1166	461	725	595	324
mec-5	WBGene00003169	Uncharacterized protein	12.427	-1.1951	-1.2152	-1.12452	-1.36007	-1.29596	-1.18286	5.42795	1.79255	1.53541	1.51136	1.62323	1.34886	1.41853	1.55027	5.42795	1.79255	1.53541	1.51136	1.62323	1.34886	1.41853	1.55027	32.4057	2.18813	1.79574	1.75509	2.03852	1.32252	1.82289	1.72373	1481	101	96	81	103	62	66	72
mct-3	WBGene00010834	MonoCarboxylate Transporter family	12.4032	1.14065	1.14622	-1.42135	1.01018	1.14697	-1.4068	6.3857	2.75306	2.94292	2.94994	2.24581	2.76768	2.95089	2.26065	6.3857	2.75306	2.94292	2.94994	2.24581	2.76768	2.95089	2.26065	56.8752	5.35676	6.36234	6.47942	3.75893	5.06892	7.15506	3.37042	4730	447	614	542	346	429	467	257
F32A5.3	WBGene00017969	Uncharacterized serine carboxypeptidase F32A5.3	12.3589	2.32325	2.37635	1.09608	1.46102	1.59999	1.35521	6.86992	3.24244	4.45858	4.49119	3.37479	3.78942	3.9205	3.68096	6.86992	3.24244	4.45858	4.49119	3.37479	3.78942	3.9205	3.68096	82.6703	8.19768	21.143	21.9283	9.4476	11.9091	14.8497	10.6951	6622	658	1965	1767	837	969	933	783
fipr-21	WBGene00009621	FIP (Fungus-Induced Protein) Related	12.3289	1.37978	-1.27683	-1.03339	-1.2495	1.01597	-1.09963	8.52452	4.90055	5.36499	4.54797	4.85317	4.5792	4.9234	4.76352	8.52452	4.90055	5.36499	4.54797	4.85317	4.5792	4.9234	4.76352	419.556	28.9524	40.724	22.753	29.4512	22.4359	30.9402	25.2834	6604	457	744	361	513	359	382	364
R193.2	WBGene00020128	Uncharacterized protein	12.3205	14.5664	16.7652	9.8648	11.5567	13.7956	14.0857	5.56648	1.94349	5.80806	6.01088	5.24578	5.47414	5.72963	5.75964	5.56648	1.94349	5.80806	6.01088	5.24578	5.47414	5.72963	5.75964	34.8646	2.54319	56.5294	66.6445	39.5744	44.7602	54.8507	54.695	9218	674	17340	17722	11566	12021	11370	13210
B0273.1	WBGene00015097	Uncharacterized protein	12.3097	-1.58712	-1.22309	-1.2075	-1.31066	-1.60019	-1.26851	4.65739	1.03566	0.369244	0.745134	0.763639	0.645367	0.357413	0.692524	4.65739	1.03566	0.369244	0.745134	0.763639	0.645367	0.357413	0.692524	22.5759	0.948306	0.303317	0.655523	0.67977	0.497065	0.337417	0.53414	688	17	11	21	19	12	9	13
col-166	WBGene00000739	COLlagen	12.2632	1.01117	-1.06556	1.0197	-1.21987	-1.41133	-1.10293	6.81155	3.19529	3.21131	3.10368	3.22343	2.90856	2.69823	3.05394	6.81155	3.19529	3.21131	3.10368	3.22343	2.90856	2.69823	3.05394	79.1909	7.86895	8.0328	7.30492	8.38508	5.68427	5.8616	6.47682	3332	332	393	310	390	243	194	249
kel-10	WBGene00002186	Kelch repeat-containing protein kel-10	12.2216	-1.13777	-1.28182	-1.10425	-1.21411	-1.15795	-1.216	4.00733	0.395967	0.209756	0.0377762	0.252904	0.116063	0.184391	0.113824	4.00733	0.395967	0.209756	0.0377762	0.252904	0.116063	0.184391	0.113824	16.3985	0.279718	0.15987	0.026141	0.202114	0.073114	0.17335	0.071104	1325	23	15	3	19	7	11	6
acdh-1	WBGene00016943	Acyl CoA DeHydrogenase	12.1221	2.59709	2.59943	1.0114	-1.35352	-2.42592	1.24418	9.96547	6.3659	7.7428	7.7441	6.38226	5.92919	5.08737	6.6811	9.96547	6.3659	7.7428	7.7441	6.38226	5.92919	5.08737	6.6811	1334.39	83.9791	217.557	217.13	90.7571	63.0254	35.0207	106.691	79047	4995	14953	12969	5944	3790	1610	5765
pqn-22	WBGene00004112	Prion-like-(Q/N-rich)-domain-bearing protein	12.0484	-1.03992	-1.07176	1.1122	-1.38812	-1.7539	-1.35653	6.53866	2.94789	2.89142	2.8479	3.1013	2.47475	2.13732	2.50796	6.53866	2.94789	2.89142	2.8479	3.1013	2.47475	2.13732	2.50796	63.4869	6.41856	6.07358	5.99639	7.6522	3.91805	3.69434	4.17939	9380	867	950	875	745	536	438	550
gst-27	WBGene00001775	Glutathione S-Transferase	12.0009	1.12107	1.12337	-2.19344	1.18589	-1.1683	-1.87751	6.89697	3.31191	3.47678	3.47974	2.17871	3.55788	3.0875	2.40308	6.89697	3.31191	3.47678	3.47974	2.17871	3.55788	3.0875	2.40308	84.2408	8.63406	9.9019	9.96367	3.57714	9.87373	7.95181	3.78648	2465	254	337	294	116	294	183	102
gst-26	WBGene00001774	Glutathione S-Transferase	11.9395	1.27008	1.25057	-1.69531	1.16205	-1.01975	-1.42879	6.50571	2.92804	3.27297	3.25063	2.1665	3.14472	2.89983	2.41324	6.50571	2.92804	3.27297	3.25063	2.1665	3.14472	2.89983	2.41324	61.9016	6.28706	8.4931	8.238	3.54193	7.043	6.9485	3.81353	1811	185	289	243	115	210	160	102
folt-2	WBGene00018138	Folate-like transporter 2	11.9271	2.60468	2.96589	-1.66309	1.3886	-4.8633	1.27051	7.80715	4.23098	5.61208	5.79944	3.49711	4.70461	1.94904	4.57639	7.80715	4.23098	5.61208	5.79944	3.49711	4.70461	1.94904	4.57639	203.311	17.7588	49.02	57.0993	10.3529	24.6567	3.1023	21.7786	12036	1054	3367	3400	678	1483	144	1178
nhx-2	WBGene00003730	Na(+)/H(+) exchanger protein 2	11.8847	1.83031	2.21356	1.35225	2.29828	2.34098	1.17282	5.94504	2.37401	3.2461	3.52038	2.80937	3.57456	3.60112	2.60399	5.94504	2.37401	3.2461	3.52038	2.80937	3.57456	3.60112	2.60399	43.0831	3.83209	8.30105	10.3395	6.01567	10.0282	11.7677	4.51985	3871	345	866	935	598	916	829	371
ZK1010.5	WBGene00014179	Uncharacterized protein	11.7668	-1.11741	-1.16908	-1.00336	-1.11711	-1.10746	-1.04853	3.89663	0.33998	0.17982	0.114602	0.335137	0.180205	0.192727	0.271606	3.89663	0.33998	0.17982	0.114602	0.335137	0.180205	0.192727	0.271606	15.3891	0.24083	0.138959	0.084859	0.27201	0.120264	0.180483	0.188409	1623	26	18	9	32	13	15	19
clec-51	WBGene00015050	C-type LECtin	11.7526	1.21947	1.90162	-1.05688	1.43181	2.49173	1.23236	6.31467	2.75976	3.04602	3.68699	2.67995	3.2776	4.07691	3.06118	6.31467	2.75976	3.04602	3.68699	2.67995	3.2776	4.07691	3.06118	54.1954	5.39314	6.95231	11.6761	5.3636	7.84594	16.492	6.51554	2329	229	345	502	253	341	555	254
sams-5	WBGene00006416	Non-coding transcript of protein-coding gene sams-5	11.7456	-1.6902	-1.7796	-1.49145	-1.54747	-1.82346	-1.86913	5.07738	1.52333	0.766136	0.69178	0.946613	0.893422	0.656649	0.620963	5.07738	1.52333	0.766136	0.69178	0.946613	0.893422	0.656649	0.620963	27.6282	1.66498	0.683881	0.589838	0.905592	0.749404	0.672526	0.474173	1566	102	50	38	62	47	34	27
C05D12.3	WBGene00014666	Non-coding transcript of protein-coding gene C05D12.3b	11.6828	-1.47256	-1.51809	-3.08703	1.16274	-2.15661	-2.08293	6.10576	2.55944	2.00111	1.95718	0.933224	2.77697	1.45068	1.50083	6.10576	2.55944	2.00111	1.95718	0.933224	2.77697	1.45068	1.50083	47.4383	4.54174	2.8327	2.75301	0.887077	5.11191	1.87844	1.61819	6961	660	480	401	144	761	219	215
B0252.5	WBGene00015089	Uncharacterized protein	11.6489	-1.38858	-1.34663	-1.23522	-1.3637	-1.33134	-1.40172	4.1156	0.573476	0.0998673	0.144124	0.268714	0.12595	0.160599	0.086274	4.1156	0.573476	0.0998673	0.144124	0.268714	0.12595	0.160599	0.086274	17.4477	0.431895	0.081957	0.107408	0.215056	0.079686	0.151602	0.052046	734	19	4	5	10	4	5	2
tba-4	WBGene00006530	Tubulin alpha chain	11.5859	1.21273	1.13408	-1.17816	1.07733	1.074	-1.17196	7.23999	3.7057	3.98396	3.88722	3.46916	3.81316	3.80869	3.47678	7.23999	3.7057	3.98396	3.88722	3.46916	3.81316	3.80869	3.47678	118.016	12.0644	14.7282	13.6692	10.1474	12.206	13.6496	8.9846	7382	757	1069	860	702	776	670	514
T02B5.3	WBGene00011364	Carboxylic ester hydrolase	11.575	1.79795	2.55899	2.74242	1.45231	4.00459	3.76833	4.71391	1.18097	2.02732	2.53655	2.63642	1.71932	3.18263	3.0949	4.71391	1.18097	2.02732	2.53655	2.63642	1.71932	3.18263	3.0949	23.1539	1.1414	2.9092	4.59406	5.13161	1.95922	8.61353	6.69514	2184	108	319	436	535	188	637	577
clec-47	WBGene00011668	C-type LECtin	11.4735	21.5258	24.3086	9.62998	5.43282	19.4924	21.1258	7.64146	4.12122	8.54921	8.72461	7.38875	6.56292	8.40606	8.52215	7.64146	4.12122	8.54921	8.72461	7.38875	6.56292	8.40606	8.52215	176.701	16.475	380.359	406.509	178.558	98.6299	319.488	362.203	3963	371	9897	9170	4427	2247	5618	7421
zig-12	WBGene00019727	2 (Zwei) IG domain protein	11.4172	-1.10913	-1.053	-1.14087	-1.48664	-1.3622	-1.12584	7.58703	4.07388	3.92446	3.99938	3.88375	3.50183	3.62794	3.90289	7.58703	4.07388	3.92446	3.99938	3.88375	3.50183	3.62794	3.90289	167.587	16.0098	14.073	15.0545	14.0177	9.44103	12.0501	12.7781	4623	443	451	418	428	265	261	322
F38B2.4	WBGene00009531	Adenylate kinase isoenzyme 1	11.3499	1.25366	1.12499	1.13043	1.07514	1.24206	-1.14413	6.19055	2.68595	3.01209	2.85586	2.86282	2.79047	2.99869	2.4917	6.19055	2.68595	3.01209	2.85586	2.86282	2.79047	2.99869	2.4917	49.8874	5.07379	6.73737	6.04659	6.27983	5.18123	7.39953	4.14293	1406	149	229	178	204	155	171	111
F55A11.11	WBGene00010082	Uncharacterized protein	11.2931	1.0313	-1.24128	-1.03062	-1.11491	1.04953	-1.08251	3.90784	0.410473	0.45494	0.0986463	0.366963	0.253552	0.480221	0.296094	3.90784	0.410473	0.45494	0.0986463	0.366963	0.253552	0.480221	0.296094	15.4894	0.289003	0.379519	0.073502	0.303044	0.170829	0.471148	0.199347	680	13	20	4	15	8	17	8
F40H3.2	WBGene00018250	Uncharacterized protein	11.2647	1.695	1.40779	-1.57765	1.33258	-1.51183	-1.80595	4.70013	1.20639	1.96768	1.69982	0.548617	1.62062	0.610092	0.353633	4.70013	1.20639	1.96768	1.69982	0.548617	1.62062	0.610092	0.353633	22.955	1.18135	2.75211	2.144	0.459242	1.75879	0.619634	0.247528	407	21	57	39	9	32	9	4
mlc-1	WBGene00003369	Myosin regulatory light chain 1	11.215	1.10491	-1.00929	-1.10273	-1.23482	1.03519	-1.14494	9.07081	5.58345	5.72738	5.57011	5.44238	5.27915	5.63335	5.38817	9.07081	5.58345	5.72738	5.57011	5.44238	5.27915	5.63335	5.38817	669.369	47.9593	53.4762	48.6555	45.7521	38.452	51.4349	41.5996	15944	1145	1478	1166	1205	931	961	906
C35C5.10	WBGene00007959	Uncharacterized protein	11.1477	1.41396	1.3668	-1.72114	1.0985	-1.50498	-1.10198	6.33084	2.85217	3.35191	3.30298	2.06881	2.9877	2.26243	2.71207	6.33084	2.85217	3.35191	3.30298	2.06881	2.9877	2.26243	2.71207	54.835	5.81399	9.07765	8.623	3.22465	6.09882	4.12858	4.93539	2268	241	435	360	149	257	134	188
dct-18	WBGene00010266	DAF-16/FOXO Controlled, germline Tumor affecting	11.1231	1.74075	1.81373	-1.2416	1.27036	1.29284	-1.27035	8.72126	5.24578	6.04549	6.10474	4.93357	5.59101	5.61633	4.90055	8.72126	5.24578	6.04549	6.10474	4.93357	5.59101	5.61633	4.90055	502.311	37.8687	66.6948	71.5225	31.3565	48.9375	50.6765	28.2277	15673	1184	2415	2245	1082	1552	1240	805
Y57G11C.5	WBGene00013303	Uncharacterized protein	11.0838	1.05826	1.46254	1.37064	1.58996	1.58438	1.95701	3.95138	0.480991	0.562688	1.02947	0.935839	1.14998	1.14491	1.44964	3.95138	0.480991	0.562688	1.02947	0.935839	1.14998	1.14491	1.44964	15.9063	0.345392	0.481761	0.981228	0.890098	1.03471	1.34385	1.53124	785	26	24	49	58	46	48	70
gyg-1	WBGene00006863	Glycogenin-1	11.0604	-1.1066	-1.06219	-1.1169	-1.02139	-1.13232	1.29394	6.34166	2.87433	2.7282	2.78729	2.71483	2.8438	2.69505	3.2461	6.34166	2.87433	2.7282	2.78729	2.71483	2.8438	2.69505	3.2461	55.2817	5.98826	5.37807	5.67232	5.52954	5.387	5.84165	7.58826	2317	283	286	268	287	265	222	319
C35E7.10	WBGene00016462	Tyrosine-protein kinase	11.0345	1.25813	-1.0187	-1.00338	-1.13379	1.07863	1.03774	3.74883	0.284884	0.616169	0.25816	0.280016	0.103727	0.39408	0.338331	3.74883	0.284884	0.616169	0.25816	0.280016	0.103727	0.39408	0.338331	14.1873	0.199151	0.535712	0.198726	0.226034	0.065593	0.377665	0.2347	845	12	30	13	16	5	18	13
C49F5.7	WBGene00008211	Uncharacterized protein	10.9978	1.30611	-1.5007	1.04287	-1.19095	1.43787	-1.31772	7.36932	3.91019	4.29547	3.32455	3.97075	3.65808	4.43412	3.51215	7.36932	3.91019	4.29547	3.32455	3.97075	3.65808	4.43412	3.51215	132.872	13.9483	18.7389	8.81141	14.9388	10.7308	21.5711	9.25001	1648	174	270	110	205	136	210	105
tni-1	WBGene00006584	Troponin I 1	10.9778	1.18966	1.2469	-1.0086	1.16013	1.019	-1.08289	6.58812	3.13161	3.38215	3.44996	3.11926	3.34589	3.15877	3.01672	6.58812	3.13161	3.38215	3.44996	3.11926	3.34589	3.15877	3.01672	65.7672	7.44473	9.30937	9.77627	7.76798	8.28793	8.48094	6.32912	2300	261	378	344	301	295	233	203
abhd-3.2	WBGene00016644	ABHydrolase Domain containing homolog	10.9204	1.53216	1.49143	-1.46536	1.81297	-1.40825	-1.00327	6.32939	2.88043	3.496	3.45712	2.32917	3.73879	2.38653	2.87572	6.32939	2.88043	3.496	3.45712	2.32917	3.73879	2.38653	2.87572	54.8006	6.02759	10.0519	9.84198	4.02541	11.4405	4.59839	5.64855	2868	313	608	515	230	607	187	266
lbp-5	WBGene00002257	Fatty acid-binding protein homolog 5	10.7286	1.0724	1.23013	1.3982	1.1701	1.61023	1.0991	7.03562	3.61223	3.71307	3.91103	4.09579	3.83886	4.29949	3.74855	7.03562	3.61223	3.71307	3.91103	4.09579	3.83886	4.29949	3.74855	95.6056	11.2029	11.8863	14.0013	16.3008	12.4518	19.502	11.3316	1825	215	264	269	344	242	292	198
dhs-25	WBGene00000988	DeHydrogenases, Short chain	10.6463	1.49647	1.23313	-1.55939	1.0142	-1.63242	-1.22233	7.41272	4.00044	4.582	4.30276	3.35945	4.02078	3.29342	3.7108	7.41272	4.00044	4.582	4.30276	3.35945	4.02078	3.29342	3.7108	139.685	14.8874	23.2003	18.8877	9.31182	14.4454	9.36427	11.0026	4845	518	934	659	358	509	255	349
acox-1.3	WBGene00008566	Acyl-coenzyme A oxidase	10.6393	-1.09827	-1.07121	-1.62028	-1.37861	-1.19466	-1.30398	4.69226	1.28093	1.14569	1.18168	0.584682	0.817715	1.02433	0.898012	4.69226	1.28093	1.14569	1.18168	0.584682	0.817715	1.02433	0.898012	22.8799	1.28398	1.15506	1.18948	0.49627	0.668466	1.14356	0.768781	2107	119	124	111	51	63	83	65
Y38F1A.1	WBGene00012605	Uncharacterized protein	10.6139	-1.07975	1.17066	1.09481	1.19795	-1.10888	1.37214	4.43984	1.03195	0.921257	1.25927	1.16263	1.29253	0.882848	1.48838	4.43984	1.03195	0.921257	1.25927	1.16263	1.29253	0.882848	1.48838	20.4082	0.943668	0.85643	1.299	1.2211	1.2474	0.949252	1.59932	768	36	38	50	51	48	28	55
ZK593.3	WBGene00014003	Uncharacterized protein	10.5944	1.10093	-1.07743	1.04354	-1.38281	-1.10845	-1.76185	6.99179	3.58655	3.72528	3.47896	3.64804	3.11895	3.43801	2.76946	6.99179	3.58655	3.72528	3.47896	3.64804	3.11895	3.43801	2.76946	91.7716	11.0183	12.0473	9.95862	11.6734	6.88846	10.5356	5.2113	1892	228	289	207	267	145	171	99
test-1	WBGene00016918	vertebrate proteoglycan TESTican homolog	10.5762	1.09899	-1.30268	-1.4215	-1.45367	-1.74976	-1.32857	7.66704	4.26428	4.40046	3.88279	3.75686	3.72458	3.45712	3.85441	7.66704	4.26428	4.40046	3.88279	3.75686	3.72458	3.45712	3.85441	180.898	18.1839	20.2157	13.6046	12.7359	11.3247	10.6725	12.2711	5292	497	554	393	402	325	256	322
gst-28	WBGene00001776	Glutathione S-Transferase	10.535	1.47719	1.76076	1.7966	1.94838	6.83981	1.92889	5.27915	1.88203	2.44488	2.69823	2.72729	2.8443	4.65598	2.8298	5.27915	1.88203	2.44488	2.69823	2.72729	2.8443	4.65598	2.8298	29.9874	2.38214	4.21358	5.22144	5.59108	5.38755	25.3962	5.46352	878	70	143	154	181	161	583	146
vha-5	WBGene00006914	V-type proton ATPase subunit a	10.3883	1.38931	1.22351	1.07346	1.25638	1.15567	-1.11683	6.46855	3.09166	3.56603	3.38268	3.19393	3.42094	3.3004	2.93226	6.46855	3.09166	3.56603	3.38268	3.19393	3.42094	3.3004	2.93226	60.2387	7.2002	10.6464	9.20469	8.17404	8.81547	9.39335	5.86973	7334	879	1504	1128	1100	1091	897	653
ttr-14	WBGene00011460	TransThyretin-Related family domain	10.3558	-1.02773	1.1342	1.02467	1.31218	1.14718	-1.20744	5.97445	2.60209	2.56262	2.78376	2.63725	2.99406	2.80019	2.33014	5.97445	2.60209	2.56262	2.78376	2.63725	2.99406	2.80019	2.33014	43.6342	4.67523	4.72788	5.65067	5.13832	6.12529	6.35516	3.56549	2474	266	311	323	323	353	283	185
C27D8.2	WBGene00007778	Uncharacterized protein	10.339	-1.19579	-1.22872	-1.14238	1.06096	1.45349	-1.00756	4.17162	0.801605	0.543643	0.504451	0.609566	0.886969	1.34112	0.790734	4.17162	0.801605	0.543643	0.504451	0.609566	0.886969	1.34112	0.790734	17.8696	0.666186	0.463881	0.411018	0.520465	0.742089	1.70012	0.642062	1248	47	38	29	41	53	94	41
T14G10.8	WBGene00011777	Uncharacterized protein	10.2997	1.1488	-1.01356	1.15472	1.19657	-1.50958	1.26389	5.40832	2.04379	2.24392	2.02436	2.25133	2.30269	1.44964	2.38166	5.40832	2.04379	2.24392	2.02436	2.25133	2.30269	1.44964	2.38166	32.1052	2.78448	3.53688	2.92384	3.78051	3.35812	1.87548	3.72942	814	71	105	75	106	87	38	87
F09C12.8	WBGene00017279	Uncharacterized protein	10.122	-1.03536	-1.12263	-1.0661	1.16551	1.05233	-1.07352	3.6177	0.278275	0.228148	0.111397	0.185937	0.499238	0.351868	0.175926	3.6177	0.278275	0.228148	0.111397	0.185937	0.499238	0.351868	0.175926	13.2636	0.192529	0.180052	0.082791	0.143659	0.363528	0.332257	0.114164	568	9	9	4	7	16	12	5
col-77	WBGene00000653	COLlagen	10.044	1.14965	1.12354	1.02298	1.69966	1.38959	1.08577	3.40282	0.0745496	0.275743	0.242601	0.107328	0.839795	0.549211	0.193267	3.40282	0.0745496	0.275743	0.242601	0.107328	0.839795	0.549211	0.193267	11.7127	0.046981	0.223166	0.187215	0.085176	0.694262	0.54664	0.128836	498	2	12	8	4	30	19	6
grsp-4	WBGene00017201	Glycine Rich Secreted Protein	10.0404	1.56711	-1.00534	-1.09936	1.07898	-1.48869	-1.32305	6.25421	2.92646	3.57456	2.91877	2.78979	3.03613	2.35241	2.52259	6.25421	2.92646	3.57456	2.91877	2.78979	3.03613	2.35241	2.52259	52.12	6.27931	10.717	6.32216	5.91402	6.32942	4.48145	4.22506	1315	159	314	161	165	163	89	98
F57F4.4	WBGene00019017	Uncharacterized protein	10.0362	1.65445	1.99668	-1.86498	1.83945	1.8122	-1.66024	7.75577	4.42863	5.15498	5.42623	3.52946	5.3079	5.28637	3.69723	7.75577	4.42863	5.15498	5.42623	3.52946	5.3079	5.28637	3.69723	194.659	20.3832	35.0066	43.8057	10.5555	39.3951	40.3721	10.8558	56697	5949	11830	12834	3399	11656	9220	2889
C05D9.9	WBGene00015476	Uncharacterized protein	10.0288	-1.07875	-1.24585	1.36289	-1.03456	2.79022	1.07242	5.35285	2.02677	1.91741	1.70964	2.47344	1.97774	3.50714	2.12763	5.35285	2.02677	1.91741	1.70964	2.47344	1.97774	3.50714	2.12763	31.1629	2.73635	2.61837	2.1605	4.5446	2.49623	11.0151	2.97943	600	50	56	40	88	45	152	53
F27C8.5	WBGene00009185	Uncharacterized protein	9.95993	-1.02638	1.08289	-1.00014	1.00125	-1.06049	1.16413	3.4322	0.116063	0.0785015	0.230951	0.115862	0.11787	0.0313367	0.335311	3.4322	0.116063	0.0785015	0.230951	0.115862	0.11787	0.0313367	0.335311	11.9195	0.07595	0.065595	0.176236	0.091684	0.074922	0.032356	0.231817	940	6	6	14	8	6	2	17
R02D3.1	WBGene00019819	Uncharacterized protein	9.89596	1.17072	-1.02762	-1.36169	1.00577	-1.09461	-1.40463	6.22658	2.91974	3.14713	2.88043	2.47434	2.92804	2.78932	2.42955	6.22658	2.91974	3.14713	2.88043	2.47434	2.92804	2.78932	2.42955	51.3115	6.25028	7.58076	6.14126	4.54555	5.7839	6.32492	3.87826	6723	816	1146	805	659	766	646	465
ugt-49	WBGene00007070	UDP-glucuronosyltransferase	9.88717	-1.12022	1.08056	-1.12647	-1.13184	1.16456	1.00086	6.20503	2.89948	2.73569	3.01125	2.72766	2.7208	3.11926	2.90072	6.20503	2.89948	2.73569	3.01125	2.72766	2.7208	3.11926	2.90072	50.453	6.13141	5.40921	6.85806	5.59133	4.87237	8.15869	5.74293	3697	451	460	506	453	363	469	385
decr-1.2	WBGene00012177	Probable 2,4-dienoyl-CoA reductase decr-1.2	9.85965	1.76126	2.72848	3.35965	1.55421	1.80275	4.18287	3.69177	0.390234	1.20684	1.83833	2.13855	1.02642	1.24044	2.45473	3.69177	0.390234	1.20684	1.83833	2.13855	1.02642	1.24044	2.45473	13.7923	0.277341	1.25554	2.47114	3.43508	0.886674	1.50702	3.9767	596	13	63	108	164	39	52	157
col-170	WBGene00000743	COLlagen	9.80568	1.114	1.01784	-1.12216	-1.03236	-1.1719	-1.11153	4.08776	0.794142	0.949897	0.819659	0.627866	0.748194	0.565294	0.641595	4.08776	0.794142	0.949897	0.819659	0.627866	0.748194	0.565294	0.641595	17.2084	0.656448	0.892619	0.736708	0.542094	0.598051	0.565867	0.491082	722	28	44	32	26	26	19	19
dpyd-1	WBGene00016103	Dihydropyrimidine dehydrogenase [NADP(+)]	9.7983	-1.54823	-1.7543	-1.77426	-1.15986	-1.46628	-1.9032	6.11143	2.8189	2.18827	2.008	1.99168	2.60495	2.26674	1.89047	6.11143	2.8189	2.18827	2.008	1.99168	2.60495	2.26674	1.89047	47.576	5.65991	3.36889	2.87163	2.97291	4.40293	4.14063	2.38318	7025	838	578	427	486	661	480	322
K08D8.3	WBGene00010657	Uncharacterized protein	9.75864	-1.25544	-1.62325	-2.03168	-1.32119	-3.26395	-2.87573	5.76562	2.47894	2.15074	1.78005	1.45626	2.0771	0.772319	0.955006	5.76562	2.47894	2.15074	1.78005	1.45626	2.0771	0.772319	0.955006	39.076	4.1946	3.26147	2.33782	1.71946	2.7393	0.810445	0.829022	2613	282	254	158	128	187	43	51
gfi-1	WBGene00001581	GEI-4 (Four) Interacting protein	9.72916	1.58772	1.95038	-1.94498	1.83052	1.75638	-1.66338	7.53179	4.24948	4.91644	5.21323	3.28972	5.12173	5.06208	3.51536	7.53179	4.24948	4.91644	5.21323	3.28972	5.12173	5.06208	3.51536	159.242	18.0369	29.6963	37.5551	8.82075	33.9681	34.3321	9.2768	47779	5423	10338	11334	2926	10353	8077	2543
ZC317.6	WBGene00022589	Uncharacterized protein	9.6929	-1.04251	1.09951	1.15664	1.12377	-1.29447	1.16654	4.50495	1.22802	1.16796	1.36488	1.43796	1.39637	0.855655	1.45026	4.50495	1.22802	1.16796	1.36488	1.43796	1.39637	0.855655	1.45026	21.1845	1.22016	1.19264	1.48205	1.68219	1.38764	0.910396	1.5337	1024	60	67	73	90	69	35	68
T03G6.3	WBGene00020195	Uncharacterized protein	9.67994	1.01855	-1.00606	-1.09646	-1.33771	1.08769	-1.16436	5.32203	2.04703	2.07354	2.03831	1.91418	1.62726	2.1683	1.82749	5.32203	2.04703	2.07354	2.03831	1.91418	1.62726	2.1683	1.82749	30.5931	2.79113	3.0321	2.9703	2.74127	1.77743	3.78051	2.2492	1986	182	229	194	197	118	193	134
ugt-13	WBGene00019232	UDP-GlucuronosylTransferase	9.66906	4.3113	3.74785	3.86704	3.35422	3.97472	3.0688	4.80733	1.53396	3.64208	3.44002	3.48519	3.27993	3.52481	3.15163	4.80733	1.53396	3.64208	3.44002	3.48519	3.27993	3.52481	3.15163	24.2398	1.68266	11.2841	9.72476	10.2471	7.8588	11.1618	7.07491	1800	126	972	727	841	593	650	480
asp-10	WBGene00007605	ASpartyl Protease	9.58421	80.7883	97.3722	71.0817	65.2398	100.289	78.7078	7.7187	4.45804	10.7941	11.0635	10.6094	10.4857	11.1061	10.7565	7.7187	4.45804	10.7941	11.0635	10.6094	10.4857	11.1061	10.7565	189.201	20.7933	1778.23	1911.25	1453.38	1356.83	1867.93	1675	8589	935	80373	85993	62738	54812	66164	60342
idhg-2	WBGene00016266	Isocitrate dehydrogenase [NAD] subunit, mitochondrial	9.56303	1.14306	1.20328	1.29363	-1.08932	-1.02053	1.00626	5.29185	2.03439	2.22729	2.30136	2.40581	1.91096	2.00507	2.0434	5.29185	2.03439	2.22729	2.30136	2.40581	1.91096	2.00507	2.0434	30.1349	2.75991	3.47917	3.71807	4.33399	2.35769	3.26161	2.7667	1570	145	211	195	250	125	134	132
alp-1	WBGene00001132	ALP/Enigma encoding	9.5591	-1.04377	1.00821	-1.03917	-1.05334	1.15301	-1.04981	6.12362	2.86674	2.80495	2.87855	2.81131	2.79177	3.07214	2.79662	6.12362	2.86674	2.80495	2.87855	2.81131	2.79177	3.07214	2.79662	47.8253	5.94338	5.6598	6.13948	6.02211	5.18427	7.8632	5.3246	4771	699	857	746	824	679	717	646
grd-5	WBGene00001694	GRounDhog (hedgehog-like family)	9.54362	-1.46675	-1.46945	-2.32983	-2.52449	-7.8592	-1.99593	7.82212	4.56758	4.01496	4.0123	3.34736	3.23159	1.5932	3.57052	7.82212	4.56758	4.01496	4.0123	3.34736	3.23159	1.5932	3.57052	206.026	22.6648	15.0653	15.2501	9.22794	7.60505	2.16882	9.74312	2956	326	251	221	147	111	25	128
mlc-3	WBGene00003371	Myosin, essential light chain	9.54131	1.12744	-1.1104	1.09859	-1.37575	1.15284	-1.058	9.64891	6.39472	6.56777	6.24364	6.53038	5.93451	6.59991	6.31338	9.64891	6.39472	6.56777	6.24364	6.53038	5.93451	6.59991	6.31338	1001.82	85.4776	96.802	79.0603	100.345	63.2104	101.465	83.1781	21488	1838	2409	1706	2380	1378	1707	1630
C45B2.2	WBGene00016659	Uncharacterized protein	9.53283	1.28519	-1.42536	1.47937	1.0137	1.10166	1.17088	5.4596	2.2067	2.56868	1.69537	2.77167	2.22633	2.34638	2.43429	5.4596	2.2067	2.56868	1.69537	2.77167	2.22633	2.34638	2.43429	32.9314	3.25176	4.75418	2.13491	5.80987	3.14056	4.4451	3.89994	459	46	77	30	90	45	49	50
haly-1	WBGene00009813	Histidine ammonia-lyase	9.45446	1.00085	-1.31349	-1.20712	1.0026	1.06012	-1.32199	5.85001	2.60902	2.61025	2.21562	2.33745	2.61276	2.69324	2.20631	5.85001	2.60902	2.61025	2.21562	2.33745	2.61276	2.69324	2.20631	40.7852	4.70115	4.91097	3.46779	4.06382	4.43837	5.83759	3.20734	3852	445	539	330	425	426	433	277
pcp-3	WBGene00003958	Prolyl Carboxy Peptidase like	9.42905	-1.04606	1.15549	1.18207	1.67436	1.22231	1.33996	6.68279	3.44568	3.38071	3.65418	3.68699	4.18928	3.73528	3.86786	6.68279	3.44568	3.38071	3.65418	3.68699	4.18928	3.73528	3.86786	70.7037	9.75842	9.29589	11.3334	12.0633	16.5154	12.9062	12.3847	10647	1473	1624	1717	2008	2527	1524	1704
F53B6.7	WBGene00009962	Uncharacterized protein	9.41697	-1.03633	-1.07586	-1.21987	-1.27767	-1.20669	-1.4691	3.87256	0.637301	0.585822	0.531814	0.350569	0.283781	0.366241	0.082366	3.87256	0.637301	0.585822	0.531814	0.350569	0.283781	0.366241	0.082366	15.1699	0.494052	0.507322	0.434341	0.286472	0.190505	0.346627	0.049584	670	22	26	20	14	9	13	3
C52E4.7	WBGene00008259	Uncharacterized protein	9.39085	-1.01515	-1.04482	-1.11085	-1.14983	-1.27178	-1.02464	3.64891	0.417653	0.395967	0.354393	0.265993	0.216231	0.0708056	0.382531	3.64891	0.417653	0.395967	0.354393	0.265993	0.216231	0.0708056	0.382531	13.4828	0.293406	0.32216	0.273502	0.213466	0.148793	0.064258	0.272206	536	12	15	11	10	7	2	10
B0379.1	WBGene00007155	Non-coding transcript of protein-coding gene B0379.1b	9.34646	1.36032	-1.00571	1.24496	-1.3352	-1.06702	-1.04984	6.02375	2.79933	3.24328	2.79111	3.11543	2.38227	2.70574	2.72916	6.02375	2.79933	3.24328	2.79111	3.11543	2.38227	2.70574	2.72916	44.9734	5.59071	8.26731	5.6804	7.74848	3.59145	5.90298	5.02193	1336	167	286	170	255	111	138	138
W03F11.4	WBGene00021007	Protein-tyrosine-phosphatase	9.34495	-1.01375	-1.01416	-1.00175	-1.05011	-1.00756	-1.03257	3.32907	0.104887	0.08518	0.0845994	0.102366	0.0343432	0.0940153	0.0586443	3.32907	0.104887	0.08518	0.0845994	0.102366	0.0343432	0.0940153	0.0586443	11.2472	0.067887	0.070687	0.062428	0.080474	0.020606	0.08663	0.034369	2150	13	16	13	18	5	13	6
R13H4.2	WBGene00014826	Non-coding transcript of protein-coding gene R13H4.2b	9.32186	1.07968	1.06495	-1.06652	-1.62944	-1.06143	1.0789	7.43656	4.21594	4.32655	4.30673	4.12304	3.51157	4.12994	4.32551	7.43656	4.21594	4.32655	4.30673	4.12304	3.51157	4.12994	4.32551	143.73	17.5803	19.1666	18.9362	16.6237	9.53575	17.104	17.9907	4697	572	730	622	602	314	441	536
ZC262.5	WBGene00022582	Putative ATP synthase subunit epsilon, mitochondrial	9.27239	1.37029	1.42959	1.62986	-1.18901	1.60781	1.08232	6.42559	3.21265	3.66713	3.72825	3.91739	2.96289	3.89774	3.32677	6.42559	3.21265	3.66713	3.72825	3.91739	2.96289	3.89774	3.32677	58.4832	7.98989	11.4694	12.0971	14.3464	5.98492	14.5502	8.03916	449	62	102	94	122	47	88	57
R05D3.6	WBGene00019880	Putative ATP synthase subunit epsilon, mitochondrial	9.26911	1.34625	1.4062	1.57774	-1.19658	1.58592	1.07217	6.50044	3.28801	3.71696	3.77981	3.94587	3.02909	3.95333	3.38854	6.50044	3.28801	3.71696	3.77981	3.94587	3.02909	3.95333	3.38854	61.6043	8.42841	11.9361	12.6037	14.657	6.28561	15.2112	8.41219	472	65	107	98	125	49	92	59
F58H1.6	WBGene00010289	Uncharacterized protein	9.16124	1.17186	1.14932	1.13721	-1.002	-1.00647	-1.10276	3.42253	0.226985	0.455789	0.427763	0.412482	0.224096	0.217686	0.0858655	3.42253	0.226985	0.455789	0.427763	0.412482	0.224096	0.217686	0.0858655	11.8584	0.15689	0.38123	0.339371	0.347948	0.153489	0.200512	0.052045	453	6	17	14	15	6	6	2
spp-23	WBGene00021335	SaPosin-like Protein family	9.15009	2.93718	3.6767	1.94444	3.27328	6.1236	1.32651	6.73603	3.54225	5.09668	5.42066	4.5016	5.25298	6.15663	3.94988	6.73603	3.54225	5.09668	5.42066	4.5016	5.25298	6.15663	3.94988	74.1339	10.6716	33.5424	43.6008	22.2327	37.7455	74.4204	13.2458	1085	157	570	642	360	561	854	177
Y69E1A.5	WBGene00013477	Uncharacterized protein	9.06732	1.03982	1.1351	1.06016	-1.3165	-1.01766	-1.22271	6.79838	3.6177	3.67404	3.80052	3.70198	3.22099	3.59245	3.32762	6.79838	3.6177	3.67404	3.80052	3.70198	3.22099	3.59245	3.32762	78.3443	11.231	11.5281	12.7854	12.1784	7.53646	11.6853	8.04117	1888	272	323	310	325	185	221	178
unc-15	WBGene00006754	Paramyosin	9.05689	-1.14038	-1.21002	-1.27747	-1.3952	-1.43592	-1.14509	8.36546	5.18644	4.99693	4.91141	4.83316	4.70597	4.66447	4.99099	8.36546	5.18644	4.99693	4.91141	4.83316	4.70597	4.66447	4.99099	361.032	36.233	31.2349	29.9712	28.9834	24.6724	25.4576	30.1011	43904	4415	4407	3666	3897	3048	2428	3344
F58G6.7	WBGene00010277	Uncharacterized protein	9.04436	4.05854	4.92323	3.23934	2.95082	3.87371	3.31264	5.9643	2.78729	4.80825	5.08689	4.48299	4.3484	4.741	4.51527	5.9643	2.78729	4.80825	5.08689	4.48299	4.3484	4.741	4.51527	43.4272	5.49699	27.2683	33.9605	21.9671	18.6834	27.0625	20.7048	1011	129	736	795	565	442	494	440
zip-3	WBGene00012330	bZIP transcription factor family	8.90904	1.79259	1.87433	1.01171	1.38969	1.10653	1.57347	6.35658	3.20131	4.04335	4.10769	3.21811	3.67607	3.34736	3.85526	6.35658	3.20131	4.04335	4.10769	3.21811	3.67607	3.34736	3.85526	55.784	7.91686	15.3443	16.3191	8.34032	10.8905	9.74191	12.2733	2394	341	764	705	396	475	328	481
mup-2	WBGene00003495	Troponin T	8.90325	-1.0337	-1.09507	-1.13682	-1.1047	-1.41489	-1.1401	8.64229	5.48796	5.44014	5.35693	5.30296	5.34431	4.98727	5.2988	8.64229	5.48796	5.44014	5.35693	5.30296	5.34431	4.98727	5.2988	474.368	45.0585	43.3893	41.9237	41.4495	40.6738	32.4528	38.8504	26827	2554	2847	2385	2592	2337	1439	2008
dlc-2	WBGene00010888	Probable dynein light chain 2, cytoplasmic	8.8906	1.33317	1.48241	1.44452	1.01839	1.1345	1.21937	6.19697	3.04469	3.45955	3.61263	3.57528	3.07097	3.22674	3.33082	6.19697	3.04469	3.45955	3.61263	3.57528	3.07097	3.22674	3.33082	50.1045	6.94638	9.77213	10.9848	10.9465	6.56936	8.89173	8.06252	636	89	144	141	154	85	89	94
ZK809.8	WBGene00014088	Uncharacterized protein	8.86821	1.49745	1.30459	1.46214	-1.33332	1.0538	1.1135	7.44093	4.29228	4.87479	4.67588	4.84036	3.87726	4.36788	4.44738	7.44093	4.29228	4.87479	4.67588	4.84036	3.87726	4.36788	4.44738	144.413	18.5985	28.7834	25.2681	29.1182	12.8675	20.4541	19.6366	1132	147	263	200	253	103	127	142
DH11.2	WBGene00008436	Uncharacterized protein	8.85299	1.0496	1.18234	1.47206	1.01559	1.30889	-1.01398	6.41727	3.27111	3.34095	3.51275	3.82894	3.29342	3.65945	3.25107	6.41727	3.27111	3.34095	3.51275	3.82894	3.29342	3.65945	3.25107	58.1466	8.35784	8.9891	10.251	13.4841	7.95307	12.3026	7.61217	3337	481	599	592	856	464	554	400
F32D8.12	WBGene00009334	Uncharacterized protein	8.85204	1.37788	1.33044	1.48584	1.21251	1.24298	1.20214	7.13094	3.98493	4.44738	4.39683	4.5562	4.26293	4.29873	4.25053	7.13094	3.98493	4.44738	4.39683	4.5562	4.26293	4.29873	4.25053	105.005	14.7299	20.9966	20.3651	23.2512	17.522	19.4701	16.9131	6945	973	1610	1355	1698	1177	1010	1021
H06H21.8	WBGene00019164	Uncharacterized protein	8.84025	1.08893	1.2275	-1.16883	1.31862	1.25076	-1.16857	7.15317	4.00909	4.132	4.30481	3.78403	4.40811	4.33189	3.78435	7.15317	4.00909	4.132	4.30481	3.78403	4.40811	4.33189	3.78435	107.667	15.0134	16.4236	18.9131	13.0285	19.6534	19.9447	11.5992	5829	815	1030	1029	779	1081	847	572
K09G1.1	WBGene00010727	Uncharacterized protein	8.83119	1.33668	1.35935	1.0832	1.25183	-1.0011	-1.01947	7.48195	4.33934	4.758	4.78226	4.45465	4.66338	4.33775	4.31152	7.48195	4.33934	4.758	4.78226	4.45465	4.66338	4.33775	4.31152	151.431	19.244	26.3142	27.2616	21.5036	23.8182	20.05	17.8509	4381	566	883	797	688	702	460	477
T02D1.8	WBGene00011374	Uncharacterized protein	8.8163	1.19444	1.38255	1.00506	1.28725	1.54742	1.25741	7.16256	4.02239	4.27872	4.48972	4.02968	4.38668	4.65225	4.35285	7.16256	4.02239	4.27872	4.48972	4.02968	4.38668	4.65225	4.35285	108.509	15.2087	18.5111	21.9074	15.4728	19.3508	25.3613	18.3976	1905	268	377	387	301	345	349	295
tag-18	WBGene00006408	Uncharacterized protein	8.76962	-1.11116	-1.15902	-1.21566	-1.55653	-1.61168	-1.32796	7.67787	4.54536	4.3933	4.33245	4.26361	3.90702	3.8568	4.13615	7.67787	4.54536	4.3933	4.33245	4.26361	3.90702	3.8568	4.13615	182.683	22.2892	20.1383	19.3451	18.638	13.1868	14.1265	15.4176	5141	629	658	548	580	377	312	397
ZK354.3	WBGene00022706	Uncharacterized protein	8.76013	-1.07157	-1.21044	-1.17115	-1.15947	-1.22574	-1.06452	3.56006	0.429105	0.329376	0.15357	0.201184	0.215636	0.135453	0.338906	3.56006	0.429105	0.329376	0.15357	0.201184	0.215636	0.135453	0.338906	12.7883	0.301879	0.2662	0.114019	0.155316	0.147175	0.126927	0.23538	558	14	14	5	8	7	5	10
F26A3.5	WBGene00009143	Uncharacterized protein	8.73509	-1.0075	-1.3231	-1.24247	1.02114	-1.17543	1.01201	3.86392	0.737096	0.726309	0.333177	0.423879	0.767269	0.50391	0.754325	3.86392	0.737096	0.726309	0.333177	0.423879	0.767269	0.50391	0.754325	15.0966	0.595481	0.639409	0.257985	0.355493	0.616091	0.49645	0.603419	699	28	35	13	19	29	18	26
F23B12.4	WBGene00009081	Uncharacterized protein	8.68951	1.4303	1.24247	1.26568	1.31232	1.42531	1.19178	5.67669	2.55741	3.07373	2.87062	2.89732	2.94953	3.06869	2.81054	5.67669	2.55741	3.07373	2.87062	2.89732	2.94953	3.06869	2.81054	37.0098	4.53692	7.14834	6.10628	6.45002	5.91021	7.85249	5.39241	1910	216	417	306	352	291	306	227
Y16B4A.2	WBGene00012445	Carboxypeptidase	8.62974	1.37221	1.38083	-1.89406	1.25881	1.19637	-1.61424	5.50868	2.39936	2.85586	2.8649	1.47788	2.73142	2.65803	1.70851	5.50868	2.39936	2.85586	2.8649	1.47788	2.73142	2.65803	1.70851	33.8987	3.93506	5.87682	6.07071	1.77141	4.92875	5.70079	2.03222	10209	1188	2054	1839	590	1508	1347	560
F02E9.3	WBGene00008529	Uncharacterized protein	8.62339	1.0883	1.28508	1.12943	1.27421	-1.03552	1.38843	3.62152	0.513263	0.635336	0.875122	0.688853	0.862866	0.462903	0.986716	3.62152	0.513263	0.635336	0.875122	0.688853	0.862866	0.462903	0.986716	13.2895	0.373263	0.555598	0.802095	0.599836	0.716278	0.452737	0.863957	593	17	29	36	30	33	16	36
gldc-1	WBGene00020022	GLycine DeCarboxylase	8.61923	1.14666	1.1681	-1.59842	1.22319	-1.57226	-1.41304	6.72329	3.61573	3.81316	3.83989	2.93908	3.90637	2.96289	3.11693	6.72329	3.61573	3.81316	3.83989	2.93908	3.90637	2.96289	3.11693	73.4113	11.2127	12.9734	13.199	6.6914	13.18	7.21156	6.8404	9400	1441	1930	1703	948	1717	725	802
act-5	WBGene00000067	ACTin	8.50278	1.6285	1.56723	-1.11347	1.40898	1.40479	-1.04246	9.35587	6.26794	6.97148	6.91616	6.11287	6.76259	6.75829	6.20795	9.35587	6.26794	6.97148	6.91616	6.11287	6.76259	6.75829	6.20795	832.345	78.4816	127.307	126.285	75.2424	113.08	112.876	76.4774	43594	4119	7736	6653	4357	6016	4635	3659
Y43F8B.1	WBGene00012812	Uncharacterized protein	8.48714	-1.05214	-1.17912	-1.15855	-1.46051	-1.31371	-1.03247	6.75026	3.66498	3.59166	3.42728	3.45266	3.11851	3.27133	3.61888	6.75026	3.66498	3.59166	3.42728	3.45266	3.11851	3.27133	3.61888	74.9953	11.7038	10.8794	9.5822	10.0329	6.88557	9.20437	10.1457	4107	668	682	519	582	407	399	501
R09H10.5	WBGene00011182	Uncharacterized protein	8.48606	1.57351	1.79851	-1.18342	1.53416	2.16857	-1.0465	6.22225	3.13715	3.79114	3.98396	2.89419	3.75461	4.2539	3.07158	6.22225	3.13715	3.79114	3.98396	2.89419	3.75461	4.2539	3.07158	51.1786	7.46821	12.7436	14.8601	6.43936	11.6223	18.8299	6.55957	11563	1691	3341	3377	1609	2668	3336	1354
emb-9	WBGene00001263	Collagen alpha-1(IV) chain	8.44362	-1.18076	-1.25967	-1.24298	-1.38052	-1.5847	-1.09786	7.21711	4.13924	3.89952	3.8062	3.82545	3.67404	3.47504	4.00454	7.21711	4.13924	3.89952	3.8062	3.82545	3.67404	3.47504	4.00454	115.038	16.752	13.835	12.8041	13.4458	10.8769	10.7865	13.8654	27626	3992	3816	3117	3543	2612	2000	3021
hphd-1	WBGene00012608	Probable hydroxyacid-oxoacid transhydrogenase, mitochondrial	8.43515	1.14082	1.06957	-1.58203	-1.48715	-2.18805	-1.31021	8.30241	5.226	5.41607	5.32303	4.56422	4.65345	4.09635	4.8362	8.30241	5.226	5.41607	5.32303	4.56422	4.65345	4.09635	4.8362	333.126	37.2599	42.6024	40.9288	23.413	23.6397	16.7285	26.9993	21624	2424	3209	2673	1680	1559	852	1601
K11H12.7	WBGene00019663	Uncharacterized protein	8.40661	1.21667	1.43205	1.08451	1.16242	1.09666	1.16845	6.46544	3.39392	3.67686	3.912	3.51097	3.61105	3.52703	3.61851	6.46544	3.39392	3.67686	3.912	3.51097	3.61105	3.52703	3.61851	60.0571	9.26699	11.5569	14.0024	10.4278	10.3224	11.2033	10.1453	1071	166	240	252	206	187	157	166
C18B2.5	WBGene00015956	Uncharacterized protein	8.39909	1.35454	1.52799	-1.00728	1.21759	1.44241	1.23968	6.81281	3.74257	4.18038	4.35421	3.73211	4.02661	4.27105	4.05254	6.81281	3.74257	4.18038	4.35421	3.73211	4.02661	4.27105	4.05254	79.2379	12.4023	17.1111	19.7195	12.4417	14.5215	19.0563	14.4114	7550	1174	1882	1888	1303	1404	1418	1249
got-1.2	WBGene00020146	Probable aspartate aminotransferase, cytoplasmic	8.37973	-1.11705	-1.24368	-1.15703	-1.12392	-1.02897	-1.11962	6.89585	3.82894	3.66925	3.51432	3.61851	3.66041	3.78775	3.66594	6.89585	3.82894	3.66925	3.51432	3.61851	3.66041	3.78775	3.66594	84.1432	13.1385	11.4755	10.2685	11.3686	10.7381	13.4466	10.6068	4794	751	759	589	716	622	601	553
irld-1	WBGene00044529	Insulin/EGF-Receptor L Domain protein	8.34934	1.79038	2.24268	1.92998	1.25763	1.57442	1.74799	3.75623	0.694572	1.53484	1.85979	1.64316	1.02527	1.34939	1.50027	3.75623	0.694572	1.53484	1.85979	1.64316	1.02527	1.34939	1.50027	14.2276	0.554176	1.79542	2.52854	2.07743	0.885636	1.70926	1.61685	270	9	17	16	16	18	16	16
col-153	WBGene00000726	COLlagen	8.33327	1.14079	-1.08376	1.06029	1.06197	1.43898	1.32827	3.99045	0.931571	1.1216	0.815527	1.01602	1.01831	1.45662	1.34112	3.99045	0.931571	1.1216	0.815527	1.01602	1.01831	1.45662	1.34112	16.2147	0.81116	1.118	0.732826	1.01117	0.876159	1.89046	1.34214	764	39	62	35	53	42	70	58
ddo-2	WBGene00017565	D-aspartate oxidase 2	8.31956	1.15533	-1.35681	1.18073	-1.24738	-1.12003	-1.07824	7.16563	4.10912	4.31743	3.6689	4.3488	3.79022	3.94558	4.00044	7.16563	4.10912	4.31743	3.6689	4.3488	3.79022	3.94558	4.00044	108.926	16.3616	19.0393	11.4647	19.8114	11.9425	15.1618	13.844	5168	784	1054	549	1037	577	564	598
ZK1058.9	WBGene00014207	Uncharacterized protein	8.31022	1.09511	-1.01311	-1.0104	-1.15667	-1.13189	1.09186	6.87034	3.81546	3.94654	3.79667	3.80052	3.60548	3.63673	3.94224	6.87034	3.81546	3.94654	3.79667	3.80052	3.60548	3.63673	3.94224	82.703	13.014	14.3355	12.748	13.1952	10.2876	12.1104	13.1371	2918	460	571	455	508	375	342	427
F29B9.7	WBGene00017922	Uncharacterized protein	8.26386	1.06822	-1.07964	1.06895	1.02724	-1.0844	1.00691	3.38989	0.343069	0.438277	0.232514	0.439261	0.381841	0.226174	0.353008	3.38989	0.343069	0.438277	0.232514	0.439261	0.381841	0.226174	0.353008	11.6479	0.244249	0.359236	0.177877	0.368613	0.269172	0.208108	0.247268	286	6	11	5	10	7	5	6
C43E11.5	WBGene00016605	Uncharacterized protein	8.2311	-1.01915	-1.21878	1.00358	-1.17388	1.02298	-1.16985	3.51157	0.470479	0.443112	0.185044	0.475637	0.239194	0.503258	0.244155	3.51157	0.470479	0.443112	0.185044	0.475637	0.239194	0.503258	0.244155	12.4495	0.336423	0.3651	0.136303	0.398915	0.162805	0.494826	0.168638	640	18	22	8	23	9	20	8
unc-27	WBGene00006764	Troponin I 2	8.08429	-1.12031	-1.2014	-1.32965	-1.67337	-1.51901	-1.38855	9.44124	6.42612	6.26223	6.16141	6.01508	5.68337	5.82299	5.95255	9.44124	6.42612	6.26223	6.16141	6.01508	5.68337	5.82299	5.95255	885.291	87.1225	78.1158	74.8453	70.2875	52.5817	58.7012	63.4456	29966	2955	3068	2549	2630	1808	1558	1962
poml-3	WBGene00077701	PON (paraoxonase) and MEC-6 Like	8.05748	-1.8972	-1.49419	-1.4419	-1.65181	-1.07178	-1.0809	4.79707	1.78674	0.862866	1.20737	1.25876	1.06268	1.68672	1.6745	4.79707	1.78674	0.862866	1.20737	1.25876	1.06268	1.68672	1.6745	24.1167	2.17279	0.787826	1.22474	1.37314	0.926523	2.36263	1.96613	1230	111	47	63	78	48	95	92
C35E7.9	WBGene00016461	Major sperm protein	8.04705	-1.24201	-1.11781	1.25533	1.214	1.08714	1.24897	3.94145	0.932992	0.620319	0.772319	1.26106	1.21276	1.05353	1.25373	3.94145	0.932992	0.620319	0.772319	1.26106	1.21276	1.05353	1.25373	15.7984	0.812791	0.538809	0.681185	1.377	1.1245	1.19	1.21665	665	35	27	29	65	49	40	47
F09B9.4	WBGene00008603	Uncharacterized protein	8.00668	-1.18045	-1.1767	1.384	-1.11034	1.02373	1.34676	5.96222	2.96101	2.72168	2.72626	3.42986	2.81002	2.99485	3.3905	5.96222	2.96101	2.72168	2.72626	3.42986	2.81002	2.99485	3.3905	43.3897	6.47729	5.35253	5.35056	9.84313	5.25239	7.36979	8.43303	1179	177	169	147	296	145	157	210
ugt-46	WBGene00015141	Putative UDP-glucuronosyltransferase ugt-46	7.99817	1.27476	1.44535	-1.19716	-1.10811	1.06307	-1.17599	5.96328	2.96361	3.31384	3.49504	2.704	2.81551	3.05185	2.72974	5.96328	2.96361	3.31384	3.49504	2.704	2.81551	3.05185	2.72974	43.406	6.48615	8.81251	10.0802	5.47593	5.27483	7.77893	5.02421	3217	482	758	752	449	398	452	341
Y53F4B.19	WBGene00013165	Major sperm protein	7.98234	-1.11087	-1.04223	1.17813	-1.13817	-1.15702	1.13246	3.73666	0.739851	0.58816	0.680172	0.976344	0.553129	0.529439	0.919316	3.73666	0.739851	0.58816	0.680172	0.976344	0.553129	0.529439	0.919316	14.0932	0.598885	0.508555	0.57734	0.950524	0.412989	0.52257	0.793499	666	29	28	28	50	20	20	35
K07A3.3	WBGene00019461	Non-coding transcript of protein-coding gene K07A3.3a	7.9655	1.13837	-1.00327	1.03551	-1.00904	-1.0061	1.00241	3.03582	0.0420601	0.229034	0.0373511	0.0924046	0.0290733	0.0332836	0.045532	3.03582	0.0420601	0.229034	0.0373511	0.0924046	0.0290733	0.0332836	0.045532	9.60697	0.02618	0.180773	0.026081	0.071079	0.016528	0.03346	0.028718	706	3	16	3	6	2	3	3
ifc-2	WBGene00002056	Intermediate Filament, C	7.89943	2.24116	2.71086	1.37807	1.97702	2.12402	1.75495	6.98442	4.00267	5.16691	5.44142	4.46532	4.986	5.08947	4.8141	6.98442	4.00267	5.16691	5.44142	4.46532	4.986	5.08947	4.8141	90.9543	14.9316	35.3518	44.2149	21.6714	30.6983	35.1365	26.494	9019	1453	4002	4365	2410	2982	2846	2450
nspa-5	WBGene00013887	Nematode Specific Peptide family, group A	7.85929	-1.36033	-1.26954	1.48648	-1.23039	-1.31761	1.20298	4.77389	1.79949	1.35553	1.45518	2.37138	1.50038	1.40157	2.0661	4.77389	1.79949	1.35553	1.45518	2.37138	1.50038	1.40157	2.0661	23.8461	2.19905	1.46949	1.65282	4.18282	1.56781	1.78587	2.82272	117	11	9	9	23	8	7	13
D1086.6	WBGene00008393	Uncharacterized protein	7.85458	-1.10282	-1.0684	-1.26308	1.04568	-1.00979	-1.18589	7.51254	4.53901	4.39781	4.44355	4.20206	4.60344	4.52495	4.29304	7.51254	4.53901	4.39781	4.44355	4.20206	4.60344	4.52495	4.29304	156.228	22.1956	20.1932	21.2535	17.7239	22.7751	23.1986	17.5783	6355	905	953	870	797	941	740	654
F21H7.2	WBGene00009028	Uncharacterized protein	7.83818	-1.01453	-1.03085	1.30314	-1.00262	1.26296	1.114	3.56195	0.591434	0.570616	0.547605	0.973431	0.587655	0.928239	0.747181	3.56195	0.591434	0.570616	0.547605	0.973431	0.587655	0.928239	0.747181	12.8008	0.446946	0.489519	0.448312	0.947379	0.44282	1.01027	0.596821	908	32	41	32	75	32	57	39
C04G2.2	WBGene00007305	Uncharacterized protein	7.8325	-1.10472	-1.22364	-1.02714	-1.1285	-1.11069	1.02777	3.48519	0.515716	0.37204	0.224541	0.477087	0.341305	0.364264	0.55524	3.48519	0.515716	0.37204	0.224541	0.477087	0.341305	0.364264	0.55524	12.2834	0.374887	0.305261	0.171382	0.400052	0.23704	0.343978	0.419176	640	20	19	9	24	13	15	20
col-143	WBGene00000716	COLlagen	7.82258	2.23124	1.97001	-1.77708	1.39991	-2.17468	-2.22992	9.60477	6.63713	7.79498	7.61534	5.80762	7.12246	5.51633	5.48014	9.60477	6.63713	7.79498	7.61534	5.80762	7.12246	5.51633	5.48014	972.979	101.159	226.006	200.046	59.626	143.654	47.0889	44.6446	43370	4519	11688	8969	2938	6505	1646	1818
C46G7.2	WBGene00016722	Uncharacterized protein	7.81927	-1.10487	-1.13046	-1.08587	-1.33298	-1.09397	-1.2585	7.34763	4.3806	4.23672	4.20369	4.26174	3.96594	4.25102	4.04889	7.34763	4.3806	4.23672	4.20369	4.26174	3.96594	4.25102	4.04889	130.633	19.7754	17.995	17.5295	18.6122	13.814	18.8087	14.367	4568	693	730	617	720	491	516	459
grd-14	WBGene00001703	GRounDhog (hedgehog-like family)	7.75199	2.15941	1.58509	1.04657	1.6979	-1.42934	-1.07894	4.09778	1.14321	2.25385	1.80778	1.20889	1.90697	0.627866	1.03359	4.09778	1.14321	2.25385	1.80778	1.20889	1.90697	0.627866	1.03359	17.2839	1.09152	3.5597	2.40093	1.29645	2.34851	0.639889	0.92019	374	24	90	53	31	52	11	19
Y43C5B.3	WBGene00012786	Uncharacterized protein	7.74229	1.20715	1.34071	1.19153	1.42593	-1.27733	-1.18035	4.16116	1.2084	1.48	1.6314	1.46121	1.7203	0.85527	0.969186	4.16116	1.2084	1.48	1.6314	1.46121	1.7203	0.85527	0.969186	17.8012	1.18415	1.68533	2.00684	1.73282	1.96099	0.909789	0.843646	849	57	94	97	92	95	34	37
clec-170	WBGene00009515	C-type LECtin	7.74079	-1.12611	1.01756	-1.3321	1.31716	-1.20748	-1.29492	3.62991	0.677433	0.506087	0.702544	0.263732	1.07486	0.405429	0.304567	3.62991	0.677433	0.506087	0.702544	0.263732	1.07486	0.405429	0.304567	13.3526	0.537657	0.426862	0.602787	0.210486	0.942006	0.391551	0.205982	923	38	35	42	17	67	22	14
W10G11.3	WBGene00021136	Uncharacterized protein	7.73825	1.25923	-1.14752	-1.09889	-1.09599	-1.24536	-1.17612	5.34273	2.39073	2.72327	2.19221	2.25468	2.25849	2.07416	2.15669	5.34273	2.39073	2.72327	2.19221	2.25468	2.25849	2.07416	2.15669	30.9923	3.90424	5.3607	3.40827	3.78996	3.23126	3.47921	3.07024	907	115	182	101	123	97	80	83
spp-4	WBGene00004989	SaPosin-like Protein family	7.73169	1.64685	1.01385	-2.56483	1.65483	2.6677	-1.11523	6.32406	3.37328	4.09298	3.39312	2.01441	4.09996	4.78888	3.21594	6.32406	3.37328	4.09298	3.39312	2.01441	4.09996	4.78888	3.21594	54.5075	9.09769	15.9926	9.26649	3.05753	15.3882	28.0717	7.41833	790	133	269	136	49	227	319	99
acl-7	WBGene00012911	ACyLtransferase-like	7.71421	1.06498	1.18404	1.07812	1.31108	1.29697	1.0364	5.4474	2.49988	2.5907	2.74359	2.6084	2.89063	2.87502	2.55146	5.4474	2.49988	2.5907	2.74359	2.6084	2.89063	2.87502	2.55146	32.7883	4.28177	4.84013	5.45746	5.03303	5.60304	6.82404	4.32725	3070	402	526	514	521	533	501	371
mlc-2	WBGene00003370	Myosin regulatory light chain 2	7.71128	1.20504	1.12173	1.04491	-1.27373	1.3317	1.04768	9.93139	6.98442	7.2535	7.15014	7.0478	6.63536	7.39769	7.05161	9.93139	6.98442	7.2535	7.15014	7.0478	6.63536	7.39769	7.05161	1275.83	128.254	154.728	147.408	143.919	103.666	168.223	137.835	30390	3062	4276	3532	3790	2509	3142	3000
pmt-2	WBGene00018811	Phosphoethanolamine MethylTransferase	7.68174	1.02221	-1.21942	-2.43547	-1.50548	-1.6911	-3.21976	9.27268	6.33125	6.36294	6.04506	5.04704	5.74103	5.57329	4.64429	9.27268	6.33125	6.36294	6.04506	5.04704	5.74103	5.57329	4.64429	790.201	82.0645	84.0315	68.3109	34.2478	54.7973	49.054	23.0011	48211	5017	5949	4192	2310	3396	2347	1282
twk-18	WBGene00006672	TWiK family of potassium channels protein 18	7.62974	1.02897	1.11424	1.06579	-1.06757	1.12432	1.10178	3.98197	1.05034	1.09154	1.20639	1.14226	0.956007	1.21939	1.19017	3.98197	1.05034	1.09154	1.20639	1.14226	0.956007	1.21939	1.19017	16.1344	0.969014	1.07546	1.2231	1.19798	0.810186	1.46779	1.12541	1039	63	81	80	86	53	75	67
H27M09.5	WBGene00019248	Uncharacterized protein	7.62571	1.04761	1.0568	1.03176	1.02392	1.16144	1.02853	3.0824	0.151523	0.218624	0.23122	0.196627	0.185633	0.367442	0.192111	3.0824	0.151523	0.218624	0.23122	0.196627	0.185633	0.367442	0.192111	9.82569	0.10122	0.168748	0.17626	0.151923	0.124199	0.348328	0.128245	469	5	10	9	8	7	14	6
nlp-33	WBGene00003771	Neuropeptide-like protein 33	7.5671	1.80522	1.11568	-1.09596	1.18711	-1.03902	1.27073	7.38438	4.46464	5.31682	4.62256	4.33245	4.7121	4.40942	4.8103	7.38438	4.46464	5.31682	4.62256	4.33245	4.7121	4.40942	4.8103	134.588	20.917	39.3829	24.2009	19.6033	24.7531	21.2992	26.4281	1407	219	478	255	227	263	175	253
F53F4.13	WBGene00009995	Uncharacterized protein	7.56459	1.49514	1.44412	2.15696	1.23907	1.19668	1.41364	7.11646	4.1972	4.77748	4.72739	5.30619	4.50645	4.45624	4.69661	7.11646	4.1972	4.77748	4.72739	5.30619	4.50645	4.45624	4.69661	103.911	17.4086	26.7212	26.2865	41.4906	21.223	21.9446	24.0453	1665	280	497	424	735	346	276	352
T25C12.3	WBGene00012018	Uncharacterized protein	7.55754	2.48433	3.32011	1.10447	2.20191	3.0186	1.54954	7.20252	4.2846	5.59745	6.01583	4.42796	5.42335	5.87848	4.91644	7.20252	4.2846	5.59745	6.01583	4.42796	5.42335	5.87848	4.91644	113.396	18.4992	48.4734	66.928	21.0239	43.1961	60.8654	28.5721	33234	5433	16483	19729	6811	12860	13986	7650
vit-1	WBGene00006925	Vitellogenin-1	7.53928	-1.22298	-1.06917	-3.87479	-1.58093	-2.91789	-1.80678	10.3394	7.42493	7.13453	7.32844	5.47081	6.76415	5.88	6.5715	10.3394	7.42493	7.13453	7.32844	5.47081	6.76415	5.88	6.5715	1906.71	175.72	143.283	165.359	46.7214	113.204	60.9924	99.3785	429464	39659	37443	37462	11633	25900	10771	20448
spds-1	WBGene00012909	SPermiDine Synthase	7.51053	-1.01494	1.00793	-1.32254	1.11358	-1.1231	-1.32126	5.49962	2.5907	2.56931	2.60209	2.18739	2.7459	2.42321	2.18879	5.49962	2.5907	2.56931	2.60209	2.18739	2.7459	2.42321	2.18879	33.6981	4.63031	4.75634	4.85142	3.60385	4.98523	4.76657	3.16388	1525	213	262	225	185	237	167	135
F28H7.3	WBGene00009237	Uncharacterized protein	7.48777	1.41896	1.10965	-2.21781	1.79292	1.26208	-1.54166	7.59935	4.69481	5.19965	4.84492	3.54568	5.53712	5.03061	4.07033	7.59935	4.69481	5.19965	4.84492	3.54568	5.53712	5.03061	4.07033	169.974	25.2125	36.2214	28.5249	10.688	47.1359	33.6324	14.6031	6985	1039	1727	1179	486	1968	1084	549
nep-22	WBGene00020788	NEPrilysin metallopeptidase family	7.48099	4.17631	5.22102	3.57581	3.00177	4.59401	4.43496	6.64044	3.73721	5.79944	6.12154	5.57548	5.32303	5.93697	5.88613	6.64044	3.73721	5.79944	6.12154	5.57548	5.32303	5.93697	5.88613	68.7246	12.3341	56.1457	72.6743	50.7719	39.9429	63.4089	60.3891	7649	1376	7250	8136	6247	4516	5533	6140
mig-6	WBGene00003242	Papilin	7.46386	-1.02876	-1.15123	-1.43712	-1.30782	-1.27323	-1.39083	6.4984	3.59848	3.55757	3.39531	3.0753	3.21131	3.24999	3.12254	6.4984	3.59848	3.55757	3.39531	3.0753	3.21131	3.24999	3.12254	61.5438	11.1046	10.5566	9.27524	7.49492	7.49132	9.01723	6.90451	17007	2845	2835	2405	2312	2029	1630	1726
amt-4	WBGene00000136	Ammonium transporter	7.45057	1.47174	1.30652	1.0409	1.49479	1.90193	-1.12312	6.31829	3.42094	3.97846	3.80666	3.47877	4.00088	4.3484	3.25343	6.31829	3.42094	3.97846	3.80666	3.47877	4.00088	4.3484	3.25343	54.3371	9.45839	14.6479	12.8224	10.1974	14.2415	20.1864	7.61972	4375	764	1369	1039	908	1165	1275	561
let-2	WBGene00002280	Collagen alpha-2(IV) chain	7.44966	-1.21536	-1.25666	-1.36219	-1.44517	-1.74051	-1.23693	7.65726	4.76008	4.4787	4.43049	4.31415	4.22885	3.96057	4.45332	7.65726	4.76008	4.4787	4.43049	4.31415	4.22885	3.96057	4.45332	179.436	26.5031	21.4191	21.0416	19.2711	17.018	15.2774	19.7531	43983	6510	6093	5189	5223	4238	2937	4424
K10C2.8	WBGene00045265	Uncharacterized protein	7.43492	1.89708	2.87291	2.52734	2.01307	1.17545	2.00017	6.13308	3.23877	4.16255	4.76128	4.57639	4.24817	3.47198	4.23889	6.13308	3.23877	4.16255	4.76128	4.57639	4.24817	3.47198	4.23889	48.0706	8.13702	16.7442	26.8026	23.6187	17.2836	10.7758	16.7861	1420	241	574	797	771	519	250	453
F56F3.4	WBGene00010155	Uncharacterized protein	7.43364	1.09755	1.04819	1.05715	-1.07614	1.15584	1.04585	3.762	0.867935	1.00222	0.935839	0.94811	0.76207	1.07688	0.932616	3.762	0.867935	1.00222	0.935839	0.94811	0.76207	1.07688	0.932616	14.2865	0.733639	0.958387	0.869106	0.907777	0.610967	1.22286	0.808835	681	36	53	42	48	30	46	36
clec-56	WBGene00008595	C-type LECtin	7.4197	1.62668	1.77821	-1.31481	1.39818	2.03077	1.01756	6.1721	3.28074	3.98267	4.11116	2.88588	3.76429	4.30276	3.30586	6.1721	3.28074	3.98267	4.11116	2.88588	3.76429	4.30276	3.30586	49.2885	8.39514	14.6971	16.3501	6.39285	11.6841	19.5563	7.91591	2657	454	920	887	381	640	827	390
ZK84.2	WBGene00022650	Uncharacterized protein	7.39074	1.01369	-1.03556	-1.04983	1.40401	1.2117	1.20996	3.45376	0.568042	0.587655	0.517626	0.497884	1.05759	0.845073	0.843006	3.45376	0.568042	0.587655	0.517626	0.497884	1.05759	0.845073	0.843006	12.0508	0.426343	0.508469	0.421145	0.415854	0.923196	0.895563	0.697543	331	12	17	12	13	26	20	18
T08B1.1	WBGene00020340	Uncharacterized protein	7.38454	1.3266	1.41917	-1.21211	1.59174	1.42519	-1.13091	5.71713	2.83262	3.24035	3.33767	2.5551	3.50323	3.34378	2.65513	5.71713	2.83262	3.24035	3.33767	2.5551	3.50323	3.34378	2.65513	37.9515	5.72998	8.24492	8.90472	4.84148	9.45113	9.72106	4.71765	3154	485	793	753	442	797	643	360
B0513.5	WBGene00007197	Proline dehydrogenase 1, mitochondrial	7.35072	-1.25761	-1.16968	-1.32642	-1.32212	-1.58588	-1.39999	5.51085	2.63296	2.30228	2.40685	2.22542	2.23011	1.96768	2.14755	5.51085	2.63296	2.30228	2.40685	2.22542	2.23011	1.96768	2.14755	33.928	4.83544	3.73849	4.07284	3.69897	3.15583	3.14597	3.04592	2511	360	325	303	306	239	188	211
F36A2.14	WBGene00023490	Uncharacterized protein	7.34932	-1.49942	-1.27319	1.08206	1.01404	-1.26971	1.49275	4.08686	1.20925	0.624846	0.860808	1.32304	1.22937	0.864756	1.78722	4.08686	1.20925	0.624846	0.860808	1.32304	1.22937	0.864756	1.78722	17.1985	1.18512	0.545009	0.786055	1.46966	1.14568	0.921765	2.17653	760	53	28	35	72	52	32	88
nrf-6	WBGene00003813	Nose resistant to fluoxetine protein 6	7.31124	1.42948	1.55711	-1.08613	1.4759	1.19104	1.02831	7.02973	4.15962	4.67511	4.79849	4.04042	4.72121	4.41183	4.1999	7.02973	4.15962	4.67511	4.79849	4.04042	4.72121	4.41183	4.1999	95.2714	16.947	24.776	27.5447	15.6413	24.9767	21.3337	16.2841	10922	1947	3296	3177	1983	2909	1918	1706
atn-1	WBGene00000228	AcTiniN	7.2951	-1.02617	1.02802	-1.0297	1.03159	1.15782	1.0853	6.70125	3.83432	3.79706	3.87419	3.7921	3.8792	4.04573	3.95242	6.70125	3.83432	3.79706	3.87419	3.7921	3.8792	4.04573	3.95242	72.1271	13.1695	12.8026	13.5078	13.1033	12.9015	16.167	13.2836	8521	1541	1730	1589	1686	1529	1479	1416
K09E2.3	WBGene00019572	Uncharacterized protein	7.28176	1.0935	-1.1268	1.09534	-1.25225	1.19603	1.05249	6.81489	3.9506	4.07956	3.77837	4.08198	3.62608	4.20885	4.02441	6.81489	3.9506	4.07956	3.77837	4.08198	3.62608	4.20885	4.02441	79.3524	14.3285	15.7803	12.5922	16.1109	10.4648	18.2301	14.0626	2333	422	539	373	524	313	421	378
C46G7.1	WBGene00016721	Uncharacterized protein	7.26605	1.42877	1.76672	1.02782	1.24584	1.79438	-1.00774	7.7365	4.87533	5.39011	5.6964	4.91492	5.19244	5.71881	4.86421	7.7365	4.87533	5.39011	5.6964	4.91492	5.19244	5.71881	4.86421	191.854	28.4511	41.5039	53.2364	30.844	35.9874	54.4987	27.4527	2513	374	631	702	447	479	560	329
C29F7.3	WBGene00007812	UMP-CMP kinase 1	7.22384	1.23381	1.31918	1.0196	-1.01993	1.22888	-1.06933	7.40188	4.54911	4.85224	4.94875	4.57711	4.52065	4.84646	4.4524	7.40188	4.54911	4.85224	4.94875	4.57711	4.52065	4.84646	4.4524	137.556	22.3762	28.3897	30.8666	23.6749	21.5058	29.2881	19.7306	3679	600	881	831	700	585	615	483
F37A4.4	WBGene00018134	Ankyrin repeat-containing protein F37A4.4	7.22208	1.00398	-1.0212	1.02553	-1.00306	1.05079	-1.02221	2.97421	0.121798	0.127532	0.0915269	0.158161	0.117394	0.193267	0.090113	2.97421	0.121798	0.127532	0.0915269	0.158161	0.117394	0.193267	0.090113	9.28481	0.079957	0.104515	0.067485	0.122697	0.07375	0.180854	0.053947	1506	13	20	12	22	13	23	8
pho-7	WBGene00011879	intestinal acid PHOsphatase	7.21601	1.15257	1.20494	-1.11028	-1.07751	1.09377	-1.31494	3.5477	0.696504	0.901356	0.965464	0.545575	0.588803	0.825814	0.301512	3.5477	0.696504	0.901356	0.965464	0.545575	0.588803	0.825814	0.301512	12.6809	0.556408	0.832212	0.903714	0.45602	0.444041	0.871245	0.204525	675	30	52	49	27	24	37	10
aldo-1	WBGene00011474	Fructose-bisphosphate aldolase 1	7.18898	2.63056	3.93371	3.89523	3.86672	7.35035	4.76018	6.96436	4.11858	5.51394	6.09447	6.08029	6.06969	6.99639	6.36959	6.96436	4.11858	5.51394	6.09447	6.08029	6.06969	6.99639	6.36959	89.4627	16.4357	45.5521	70.901	73.5823	69.508	132.06	86.0977	4561	840	2695	3636	4147	3600	5279	4010
col-181	WBGene00000754	COLlagen	7.18091	1.81941	1.42076	1.10134	-1.05365	-1.26474	-1.79624	10.8597	8.01548	8.87896	8.52215	8.15474	7.94009	7.67664	7.1705	10.8597	8.01548	8.87896	8.52215	8.15474	7.94009	7.67664	7.1705	2907.87	259.764	481.927	351.763	288.796	244.026	201.186	148.479	113558	10166	21836	13816	12468	9681	6162	5299
C14C11.1	WBGene00015765	Uncharacterized protein	7.17819	-1.12751	-1.09631	1.0082	-1.05293	-1.40198	1.01603	4.76844	1.92482	1.75167	1.79216	1.9366	1.85041	1.43735	1.94776	4.76844	1.92482	1.75167	1.79216	1.9366	1.85041	1.43735	1.94776	23.8113	2.49057	2.24174	2.36226	2.79982	2.24541	1.85097	2.52754	1151	121	126	115	150	111	71	112
R102.10	WBGene00011297	Uncharacterized protein	7.16871	-1.03113	1.04771	-1.11562	-1.10739	-1.14379	-1.10178	3.15434	0.312628	0.268404	0.379868	0.154782	0.165467	0.118802	0.172789	3.15434	0.312628	0.268404	0.379868	0.154782	0.165467	0.118802	0.172789	10.2118	0.221131	0.216319	0.293146	0.120272	0.109069	0.109129	0.111716	461	11	12	14	7	5	4	5
pat-10	WBGene00003934	Paralysed Arrest at Two-fold	7.1547	1.08052	1.09292	1.10109	-1.18488	1.06784	-1.08291	10.3231	7.48424	7.59597	7.61242	7.62317	7.2395	7.57893	7.36932	10.3231	7.48424	7.59597	7.61242	7.62317	7.2395	7.57893	7.36932	1887.53	181.491	197.769	199.496	204.426	154.385	187.56	169.13	42594	4104	5178	4528	5100	3539	3319	3487
gsnl-1	WBGene00010593	Gelsolin-like protein 1	7.15002	-1.30193	-1.25565	1.06125	-1.35878	-1.29356	1.0252	5.07281	2.23486	1.85421	1.90643	2.32063	1.79255	1.86352	2.27077	5.07281	2.23486	1.85421	1.90643	2.32063	1.79255	1.86352	2.27077	27.5241	3.35744	2.44031	2.64727	4.00049	2.11797	2.86134	3.3979	1825	224	188	177	294	143	149	206
F37A4.5	WBGene00018135	Uncharacterized protein	7.14678	-1.0753	-1.00295	-1.01865	-1.0401	-1.17698	-1.10173	3.31916	0.481865	0.377126	0.477617	0.45521	0.425138	0.246772	0.342099	3.31916	0.481865	0.377126	0.477617	0.45521	0.425138	0.246772	0.342099	11.2025	0.346196	0.307857	0.384371	0.381202	0.306804	0.228635	0.237361	500	16	16	18	19	14	8	10
nspa-4	WBGene00044272	Nematode Specific Peptide family, group A	7.13352	1.25179	1.17087	1.28259	-1.00321	1.26241	1.18525	2.99829	0.163676	0.487673	0.391255	0.522739	0.159049	0.499852	0.408864	2.99829	0.163676	0.487673	0.391255	0.522739	0.159049	0.499852	0.408864	9.4053	0.110797	0.407851	0.304719	0.437595	0.104332	0.491871	0.289757	46	1	3	2	3	1	2	2
spe-26	WBGene00004972	Spermatocyte protein spe-26	7.03783	1.05809	1.01108	1.0187	1.07943	-1.06693	1.21665	3.34457	0.529439	0.610905	0.54534	0.556169	0.639714	0.435973	0.81235	3.34457	0.529439	0.610905	0.54534	0.556169	0.639714	0.435973	0.81235	11.3716	0.388682	0.530678	0.446174	0.464994	0.489837	0.424407	0.661978	905	31	49	36	41	40	27	49
ZK856.18	WBGene00194912	Uncharacterized protein	7.00338	1.06877	-1.0189	1.06673	-1.014	1.03444	-1.03905	2.9516	0.143554	0.239512	0.116534	0.236756	0.123502	0.192399	0.0882866	2.9516	0.143554	0.239512	0.116534	0.236756	0.123502	0.192399	0.0882866	9.18896	0.094583	0.187508	0.085917	0.182579	0.078266	0.180406	0.052923	381	4	9	4	9	4	6	3
Y37E11AL.2	WBGene00021358	Uncharacterized protein	6.99795	-1.01338	-1.1605	1.31232	1.11224	1.04683	1.57006	4.75709	1.95015	1.93097	1.73541	2.34227	2.10362	2.01618	2.60097	4.75709	1.95015	1.93097	1.73541	2.34227	2.10362	2.01618	2.60097	23.6346	2.56215	2.65331	2.23626	4.07959	2.80844	3.29179	4.51051	494	54	68	48	93	58	54	84
Y45F10B.13	WBGene00012875	Uncharacterized protein	6.99577	-1.03809	-1.13257	-1.08257	-1.32918	-1.09092	-1.10398	4.83032	2.02384	1.96991	1.84424	1.90938	1.6133	1.89829	1.88112	4.83032	2.02384	1.96991	1.84424	1.90938	1.6133	1.89829	1.88112	24.5034	2.73445	2.76401	2.48464	2.73054	1.74696	2.96267	2.36134	2134	239	276	218	264	153	197	187
Y44A6D.2	WBGene00012853	Uncharacterized protein	6.96349	1.85338	1.84612	1.63057	1.64924	1.43365	1.27308	4.48299	1.68318	2.57334	2.56767	2.38855	2.40498	2.20287	2.0315	4.48299	1.68318	2.57334	2.56767	2.38855	2.40498	2.20287	2.0315	21.0019	1.97058	4.76516	4.71372	4.23237	3.66333	3.88664	2.74161	226	22	60	51	51	40	33	27
oig-2	WBGene00003860	One IG domain	6.94668	-1.03197	1.07358	1.05165	-1.08175	-1.32364	-1.07059	6.48331	3.68699	3.64159	3.78942	3.75964	3.57362	3.28248	3.58858	6.48331	3.68699	3.64159	3.78942	3.75964	3.57362	3.28248	3.58858	60.9378	11.8898	11.284	12.6828	12.7877	10.0163	9.28566	9.86214	926	181	199	194	215	155	111	137
col-184	WBGene00000757	COLlagen	6.87476	1.85077	1.49398	1.2272	-1.02022	1.05126	-1.41048	10.1711	7.38981	8.27793	7.96897	7.68517	7.36093	7.46193	6.89362	10.1711	7.38981	8.27793	7.96897	7.68517	7.36093	7.46193	6.89362	1699	171.229	316.065	250.416	213.438	168.727	174.837	123.423	67925	6860	14661	10070	9432	6853	5481	4508
mlp-1	WBGene00003375	MLP/CRP family (Muscle LIM Protein/Cysteine-rich Protein)	6.87068	1.29019	1.31479	1.30859	1.20773	1.15618	1.15377	7.07525	4.2948	4.66238	4.68963	4.68281	4.5671	4.50416	4.50116	7.07525	4.2948	4.66238	4.68963	4.68281	4.5671	4.50416	4.50116	99.7502	18.6192	24.5312	25.5201	25.8519	22.2761	22.8206	20.4727	1561	293	446	402	449	357	281	295
Y32F6B.1	WBGene00012531	Solute carrier organic anion transporter family member	6.85866	-1.18844	1.21995	1.14369	-1.25699	1.21132	1.31746	5.40926	2.63133	2.38227	2.91815	2.82502	2.30136	2.90791	3.02909	5.40926	2.63133	2.38227	2.91815	2.82502	2.30136	2.90791	3.02909	32.1107	4.83055	3.9945	6.31432	6.10922	3.35381	6.98852	6.37556	3395	512	490	672	714	361	580	616
acdh-9	WBGene00017874	Acyl CoA DeHydrogenase	6.8329	1.09122	1.18277	1.16448	1.20506	1.14105	1.00795	6.80048	4.02798	4.15392	4.27015	4.24767	4.29708	4.21835	4.0394	6.80048	4.02798	4.15392	4.27015	4.24767	4.29708	4.21835	4.0394	78.5316	15.3235	16.6598	18.3788	18.3307	17.8972	18.3296	14.2462	4485	877	1104	1056	1158	1039	821	744
F20D6.5	WBGene00017635	Uncharacterized protein	6.82333	-1.242	-1.16216	-1.09734	-1.27236	1.23802	-1.00183	3.82614	1.05566	0.742991	0.838848	0.921651	0.708156	1.3637	1.05302	3.82614	1.05566	0.742991	0.838848	0.921651	0.708156	1.3637	1.05302	14.8052	0.974116	0.656757	0.756741	0.871543	0.560371	1.7353	0.943238	778	52	41	40	51	30	72	46
F59E11.5	WBGene00019111	Uncharacterized protein	6.82253	1.00708	-1.19634	-1.10973	-1.32582	-1.16621	-1.21042	3.98073	1.21042	1.22059	0.951794	1.06021	0.803531	0.988589	0.934907	3.98073	1.21042	1.22059	0.951794	1.06021	0.803531	0.988589	0.934907	16.1272	1.18662	1.26902	0.889502	1.07988	0.652788	1.09133	0.811364	479	36	44	27	36	20	26	22
ZC434.9	WBGene00013895	Uncharacterized protein	6.8182	1.39537	1.25488	1.02659	1.17157	1.08822	1.03386	4.57452	1.80513	2.28578	2.13268	1.84299	2.03357	1.9271	1.85316	4.57452	1.80513	2.28578	2.13268	1.84299	2.03357	1.9271	1.85316	21.8487	2.20412	3.67349	3.197	2.55365	2.62234	3.04132	2.30565	1630	183	360	273	242	227	196	180
F44B9.2	WBGene00018407	Uncharacterized protein	6.80175	1.10232	1.02862	-1.0104	-1.01079	-1.18212	-1.09683	3.96113	1.19523	1.33577	1.23594	1.18029	1.17974	0.953844	1.06188	3.96113	1.19523	1.33577	1.23594	1.18029	1.17974	0.953844	1.06188	15.9868	1.16415	1.43912	1.26083	1.25061	1.07867	1.04494	0.950264	1123	82	118	90	98	77	58	61
C28C12.11	WBGene00016181	Uncharacterized protein	6.79544	-1.14503	1.23852	-1.04401	-1.41846	1.2131	1.13386	3.40039	0.635826	0.440443	0.944442	0.573697	0.131505	0.914526	0.817065	3.40039	0.635826	0.440443	0.944442	0.573697	0.131505	0.914526	0.817065	11.7054	0.492603	0.362441	0.881344	0.486229	0.083476	0.991512	0.668104	411	18	16	32	20	4	28	22
acdh-5	WBGene00016491	Acyl CoA DeHydrogenase	6.7945	1.03152	1.00379	1.05983	1.0815	-1.14029	-1.08559	2.99583	0.231463	0.276233	0.236923	0.31529	0.344499	0.0420601	0.112989	2.99583	0.231463	0.276233	0.236923	0.31529	0.344499	0.0420601	0.112989	9.38883	0.159781	0.223348	0.181791	0.255251	0.239311	0.04134	0.070962	580	10	16	12	18	16	3	5
Y49E10.10	WBGene00013033	Uncharacterized protein	6.76892	-1.05996	1.26693	-1.03529	-1.13616	-1.13191	1.22583	3.33717	0.578247	0.494236	0.919587	0.528211	0.39408	0.39949	0.872001	3.33717	0.578247	0.494236	0.919587	0.528211	0.39408	0.39949	0.872001	11.2854	0.436447	0.416056	0.844214	0.441977	0.280982	0.382701	0.729314	670	26	29	51	29	17	18	40
upb-1	WBGene00017440	UreidoPropionase Beta	6.76095	-1.146	-1.24673	-1.09048	-1.32325	-1.07262	-1.29176	7.61242	4.8552	4.65859	4.53705	4.73023	4.45111	4.75407	4.48586	7.61242	4.8552	4.65859	4.53705	4.73023	4.45111	4.75407	4.48586	171.291	28.1503	24.4955	22.6183	26.6588	20.305	27.3045	20.1874	9258	1525	1536	1230	1593	1115	1157	997
cpt-5	WBGene00008629	Carnitine Palmitoyl Transferase	6.74015	-1.30086	-1.15645	1.39475	-1.20708	-1.3411	-1.42477	5.48347	2.73069	2.35123	2.52098	3.2107	2.45917	2.30728	2.21996	5.48347	2.73069	2.35123	2.52098	3.2107	2.45917	2.30728	2.21996	33.3767	5.26458	3.89383	4.52954	8.27355	3.86308	4.28286	3.23882	3422	541	464	468	938	403	345	304
mct-4	WBGene00003986	MonoCarboxylate Transporter family	6.72578	1.07947	1.23712	-1.00205	1.15224	1.06801	1.34624	5.55049	2.80079	2.91111	3.10778	2.79783	3.00522	2.89572	3.22973	5.55049	2.80079	2.91111	3.10778	2.79783	3.00522	2.89572	3.22973	34.6206	5.5936	6.20067	7.32042	5.94931	6.18212	6.93761	7.46876	3367	560	710	728	649	608	540	675
rhr-1	WBGene00004358	RH (Rhesus) antigen Related	6.71845	1.88751	1.74268	2.12667	1.59639	2.31429	1.7051	7.32733	4.5792	5.49569	5.3805	5.66779	5.25401	5.78977	5.34906	7.32733	4.5792	5.49569	5.3805	5.66779	5.25401	5.78977	5.34906	127.602	22.8592	45.0148	42.5488	54.1561	37.7602	57.3593	40.3038	8248	1481	3376	2767	3870	2480	2907	2380
C06H5.6	WBGene00007394	Uncharacterized protein	6.6977	1.04864	1.06951	-1.27304	1.10719	-1.37255	1.05851	5.94412	3.20045	3.26897	3.2974	2.85217	3.34736	2.74359	3.28248	5.94412	3.20045	3.26897	3.2974	2.85217	3.34736	2.74359	3.28248	43.047	7.91479	8.46764	8.59695	6.23782	8.29657	6.0872	7.80832	2623	489	595	529	416	510	300	439
Y39B6A.1	WBGene00012664	Uncharacterized protein	6.69511	2.07679	1.8024	-1.28399	1.67702	3.39839	-1.02235	7.57768	4.83458	5.88893	5.6845	4.47394	5.58048	6.59943	4.80269	7.57768	4.83458	5.88893	5.6845	4.47394	5.58048	6.59943	4.80269	166.497	27.7368	59.5759	52.9628	21.8011	48.6605	101.464	26.2431	17070	2850	7087	5462	2471	5068	8156	2458
anmt-2	WBGene00018340	Amine N-MethylTransferase	6.6505	-1.01004	-1.0522	-1.23277	-1.03562	-1.17618	-1.14494	4.58042	1.84695	1.83255	1.77355	1.54505	1.79646	1.61285	1.65168	4.58042	1.84695	1.83255	1.77355	1.54505	1.79646	1.61285	1.65168	21.8839	2.30817	2.40003	2.31898	1.88995	2.1306	2.20652	1.92125	839	89	107	90	81	83	67	68
acs-5	WBGene00013575	fatty Acid CoA Synthetase family	6.64662	1.28009	1.30761	-1.04847	1.12141	-1.02682	-1.05665	6.48615	3.75353	4.10978	4.14047	3.68525	3.91885	3.71535	3.67404	6.48615	3.75353	4.10978	4.14047	3.68525	3.91885	3.71535	3.67404	61.1102	12.4674	16.1278	16.8261	12.0483	13.3129	12.7443	10.6622	5857	1198	1794	1622	1277	1296	958	934
F36G3.2	WBGene00009483	Uncharacterized protein	6.61526	1.22153	1.52785	1.31694	1.50501	1.46055	1.04823	4.49039	1.76459	2.05328	2.37609	2.16178	2.35437	2.31111	1.83255	4.49039	1.76459	2.05328	2.37609	2.16178	2.35437	2.31111	1.83255	21.068	2.13041	2.98084	3.99076	3.51861	3.50278	4.29754	2.25569	922	94	152	176	171	156	148	91
C10C5.5	WBGene00007509	Aminoacylase-1	6.61299	2.53664	2.13516	2.42264	1.48655	2.86309	2.07656	4.3367	1.6114	2.95432	2.70574	2.88798	2.18337	3.12897	2.66559	4.3367	1.6114	2.95432	2.70574	2.88798	2.18337	3.12897	2.66559	19.4695	1.82963	6.4196	5.25472	6.3979	3.0129	8.23855	4.76765	1080	102	413	294	393	170	359	242
gst-36	WBGene00001784	Probable glutathione S-transferase gst-36	6.60887	1.80361	2.39316	1.33607	1.87886	3.24158	1.18342	6.44898	3.72458	4.57546	4.9835	4.14257	4.63444	5.42128	3.96755	6.44898	3.72458	4.57546	4.9835	4.14257	4.63444	5.42128	3.96755	59.3829	12.1893	23.0865	31.5797	16.9138	23.2844	44.0824	13.4947	1746	359	788	934	550	696	1016	363
C29F5.1	WBGene00016210	Uncharacterized protein	6.58826	-1.42748	-1.38043	-1.12815	-1.26823	-1.53314	1.04932	6.16141	3.44151	2.92804	2.97639	3.26756	3.09869	2.82502	3.51097	6.16141	3.44151	2.92804	2.97639	3.26756	3.09869	2.82502	3.51097	48.9212	9.66556	6.29021	6.66535	8.64923	6.7801	6.51742	9.2497	2617	519	391	359	512	369	274	452
tnt-3	WBGene00006588	TropoNin T	6.57258	1.22008	1.05804	-1.25034	-1.47523	-1.22837	-1.14837	5.03443	2.31797	2.60495	2.39936	1.99565	1.75703	2.02123	2.11839	5.03443	2.31797	2.60495	2.39936	1.99565	1.75703	2.02123	2.11839	27.1071	3.64175	4.89045	4.05884	2.98899	2.04599	3.30693	2.9514	2808	370	528	409	309	206	237	245
ckc-1	WBGene00000515	Choline Kinase C	6.55576	1.08587	1.32414	-1.34416	1.20231	-1.08836	-1.03719	6.03192	3.31916	3.43801	3.72422	2.89245	3.58497	3.19701	3.26648	6.03192	3.31916	3.43801	3.72422	2.89245	3.58497	3.19701	3.26648	45.2782	8.68613	9.66037	12.0511	6.43318	10.1404	8.68565	7.72389	2161	414	533	577	339	492	324	337
scav-1	WBGene00015389	SCAVenger receptor (CD36 family) related	6.55185	-1.02019	1.2729	-1.13092	1.04151	1.24086	-1.0293	6.15589	3.44399	3.41515	3.7921	3.26648	3.50267	3.75532	3.40233	6.15589	3.44399	3.41515	3.7921	3.26648	3.50267	3.75532	3.40233	48.7025	9.72455	9.52162	12.7227	8.64604	9.44699	13.0758	8.50634	3827	766	868	1006	751	754	806	611
cal-5	WBGene00006861	CALmodulin related genes	6.54491	1.09461	1.12662	1.07507	1.07295	1.1413	1.00485	6.28565	3.57528	3.7057	3.74728	3.67971	3.67686	3.76596	3.58226	6.28565	3.57528	3.7057	3.74728	3.67971	3.67686	3.76596	3.58226	53.186	10.9096	11.7916	12.2838	11.9831	10.8954	13.1724	9.81571	1164	240	300	271	290	243	226	197
skpo-3	WBGene00017968	ShK domain and PerOxidase domain containing protein	6.53235	-1.2826	-1.44362	-1.57964	-1.50295	-1.10245	-1.70295	5.12032	2.41272	2.05366	1.88303	1.75312	1.82492	2.27201	1.64469	5.12032	2.41272	2.05366	1.88303	1.75312	1.82492	2.27201	1.64469	28.1083	3.98191	2.98114	2.58408	2.33217	2.19134	4.15343	1.90581	3605	482	430	336	312	274	393	210
C51E3.9	WBGene00008254	Uncharacterized protein	6.50441	1.0074	1.12517	1.35246	-1.39968	1.15631	-1.10997	4.88099	2.17957	2.19021	2.34972	2.61515	1.69447	2.3891	2.02905	4.88099	2.17957	2.19021	2.34972	2.61515	1.69447	2.3891	2.02905	25.1437	3.16955	3.37705	3.90065	5.05778	1.90596	4.61282	2.73697	835	105	130	129	186	64	120	83
ugt-30	WBGene00011340	UDP-glucuronosyltransferase	6.48069	2.4436	2.54424	1.92751	2.6483	1.53744	1.49383	3.22012	0.523978	1.81299	1.87121	1.47072	1.92905	1.14451	1.10299	3.22012	0.523978	1.81299	1.87121	1.47072	1.92905	1.14451	1.10299	10.5879	0.383171	2.35231	2.5462	1.7548	2.40937	1.34367	0.996458	791	29	204	192	145	183	79	68
tag-10	WBGene00006404	Uncharacterized protein	6.47764	7.26202	8.59732	9.37656	5.58823	7.8833	11.2167	5.85534	3.15987	6.02025	6.26376	6.38893	5.64226	6.13867	6.64745	5.85534	3.15987	6.02025	6.26376	6.38893	5.64226	6.13867	6.64745	40.9316	7.62167	65.4893	80.4507	91.087	50.9389	73.4117	104.271	2685	503	4994	5322	6625	3403	3793	6271
T08H10.1	WBGene00020369	Uncharacterized protein	6.44618	1.88217	1.83918	1.37673	1.09197	1.52415	1.3202	7.50715	4.81871	5.73111	5.69777	5.27995	4.94564	5.42672	5.21946	7.50715	4.81871	5.73111	5.69777	5.27995	4.94564	5.42672	5.21946	155.091	27.4321	53.6241	53.2744	40.5595	29.5765	44.1803	36.1514	7216	1279	2895	2493	2086	1398	1612	1537
H32C10.1	WBGene00019255	Uncharacterized protein	6.44089	1.19782	1.06165	1.12889	1.28215	-1.07373	1.3795	3.02909	0.34183	0.602237	0.428137	0.51674	0.700391	0.239194	0.805976	3.02909	0.34183	0.602237	0.428137	0.51674	0.700391	0.239194	0.805976	9.56311	0.243047	0.521801	0.34021	0.433686	0.551078	0.222688	0.655738	516	8	20	17	21	16	11	27
frk-1	WBGene00001487	Fer-related kinase 1	6.42448	1.00163	-1.02944	1.03965	1.04524	-1.02382	1.06503	2.81131	0.12773	0.13008	0.0858655	0.183823	0.19156	0.0937709	0.218624	2.81131	0.12773	0.13008	0.0858655	0.183823	0.19156	0.0937709	0.218624	8.36003	0.084353	0.105756	0.063074	0.141672	0.129674	0.086589	0.148634	458	5	8	4	10	8	5	9
col-106	WBGene00000680	COLlagen	6.38303	1.76632	1.3311	-1.03325	-1.1821	-1.28929	-1.71668	10.1064	7.4322	8.25295	7.84482	7.38501	7.19084	7.06562	6.65258	10.1064	7.4322	8.25295	7.84482	7.38501	7.19084	7.06562	6.65258	1587.04	176.67	311.802	232.159	178.381	149.797	137.549	104.727	65657	7324	14966	9661	8158	6295	4462	3958
anmt-3	WBGene00011573	Amine N-MethylTransferase	6.38136	-1.25341	-1.44171	-1.23144	-1.97621	-1.49139	-1.44742	5.84762	3.17376	2.8479	2.64598	2.87342	2.19102	2.5971	2.64027	5.84762	3.17376	2.8479	2.64598	2.87342	2.19102	2.5971	2.64027	40.7677	7.7294	5.86366	5.0399	6.32353	3.03229	5.46008	4.67502	1613	307	270	201	277	122	170	169
ZC376.2	WBGene00013874	Uncharacterized protein	6.38042	1.01758	1.30685	-1.06579	-1.07677	1.13521	1.18821	4.94987	2.27621	2.30136	2.66231	2.18429	2.1695	2.45917	2.525	4.94987	2.27621	2.30136	2.66231	2.18429	2.1695	2.45917	2.525	26.1626	3.49469	3.73127	5.09521	3.5925	2.97902	4.86883	4.23463	2400	326	369	464	354	282	354	341
col-122	WBGene00000696	COLlagen	6.37143	1.85635	1.49711	1.17858	1.02353	1.00461	-1.58471	11.0178	8.34614	9.23861	8.92833	8.58319	8.3797	8.35278	7.68192	11.0178	8.34614	9.23861	8.92833	8.58319	8.3797	8.35278	7.68192	3239.88	324.63	628.2	456.85	384.296	323.645	310.9	207.902	135840	13639	30559	19266	17811	13784	10220	7963
F37C12.18	WBGene00044005	Uncharacterized protein	6.35226	-1.07528	-1.13705	1.29164	-1.63897	-1.29747	1.01702	3.62007	0.9528	0.848092	0.767501	1.32201	0.240008	0.577096	0.977154	3.62007	0.9528	0.848092	0.767501	1.32201	0.240008	0.577096	0.977154	13.2795	0.842707	0.774354	0.677573	1.46738	0.163603	0.580061	0.85341	400	26	28	21	49	6	14	24
R02D5.7	WBGene00010980	Uncharacterized protein	6.35098	1.17882	1.5348	1.34055	-1.00092	1.4041	1.22724	4.06334	1.39637	1.63372	2.01441	1.81919	1.39504	1.88601	1.69178	4.06334	1.39637	1.63372	2.01441	1.81919	1.39504	1.88601	1.69178	16.9583	1.47201	1.99479	2.8899	2.50657	1.38601	2.92472	1.99717	355	31	49	61	58	30	48	39
tsp-10	WBGene00006636	TetraSPanin family	6.34556	1.61407	1.42835	-2.35482	1.47184	1.27623	-1.28706	5.00275	2.337	3.0277	2.85135	1.10139	2.89462	2.68889	1.97292	5.00275	2.337	3.0277	2.85135	1.10139	2.89462	2.68889	1.97292	26.6833	3.69434	6.82549	6.02029	1.14721	5.61926	5.82041	2.58179	752	106	226	175	44	162	134	68
col-34	WBGene00000611	Cuticle collagen 34	6.33811	1.64671	1.53486	1.26987	1.60458	1.14361	1.13698	3.90842	1.24437	1.96396	1.86247	1.58905	1.92657	1.43796	1.42957	3.90842	1.24437	1.96396	1.86247	1.58905	1.92657	1.43796	1.42957	15.5097	1.2414	2.741	2.53325	1.98442	2.40137	1.8525	1.48958	649	52	133	107	92	102	61	57
nlp-4	WBGene00003742	Neuropeptide-Like Protein	6.33054	-1.2192	1.35384	1.40317	1.12637	1.1179	-1.15413	3.10589	0.443562	0.157624	0.880619	0.93225	0.615241	0.604358	0.236756	3.10589	0.443562	0.157624	0.880619	0.93225	0.615241	0.604358	0.236756	9.93904	0.314844	0.127146	0.805434	0.886603	0.468158	0.614134	0.16418	203	7	4	17	20	10	10	4
pgp-2	WBGene00003996	P-GlycoProtein related	6.32736	-1.03419	1.08988	-1.27525	-1.12123	-1.22388	-1.11866	5.84726	3.18565	3.13715	3.30983	2.83487	3.02057	2.89419	3.02388	5.84726	3.18565	3.13715	3.30983	2.83487	3.02057	2.89419	3.02388	40.7665	7.78667	7.51629	8.69031	6.15525	6.2498	6.92873	6.35903	7252	1386	1553	1558	1214	1131	970	1037
gpx-7	WBGene00019846	Glutathione peroxidase	6.31337	1.2803	1.98856	1.34222	1.08019	1.42727	1.1285	4.33342	1.67501	2.0315	2.66674	2.09963	1.78629	2.18827	1.84942	4.33342	1.67501	2.0315	2.66674	2.09963	1.78629	2.18827	1.84942	19.456	1.95608	2.92345	5.10596	3.32974	2.10524	3.83579	2.29914	535	53	93	141	100	58	82	57
W02A2.8	WBGene00012191	Uncharacterized protein	6.26889	1.14363	1.14519	1.30937	1.29681	1.03857	1.20247	3.90289	1.25467	1.44829	1.45026	1.64355	1.62965	1.30927	1.52068	3.90289	1.25467	1.44829	1.45026	1.64355	1.62965	1.30927	1.52068	15.4429	1.25363	1.63563	1.64371	2.07832	1.78246	1.64753	1.66912	296	22	38	28	37	34	40	30
aqp-4	WBGene00000172	AQuaPorin or aquaglyceroporin related	6.26306	1.44596	1.47904	1.23695	1.8857	1.85439	1.60469	4.93506	2.28819	2.82022	2.85285	2.59497	3.20329	3.17914	2.97049	4.93506	2.28819	2.82022	2.85285	2.59497	3.20329	3.17914	2.97049	25.9191	3.54168	5.75221	6.02338	4.97605	7.43286	8.60285	6.07388	990	136	255	232	210	289	258	212
far-8	WBGene00001392	Fatty Acid/Retinol binding protein	6.2544	1.04715	1.12535	1.46624	-1.11943	-1.04323	1.57196	6.44696	3.80209	3.86856	3.97247	4.35421	3.63932	3.74103	4.45465	6.44696	3.80209	3.86856	3.97247	4.35421	3.63932	3.74103	4.45465	59.2735	12.913	13.5583	14.7483	19.8625	10.6091	12.9485	19.7716	1924	420	511	482	713	350	330	587
col-150	WBGene00000723	COLlagen	6.25398	1.02041	1.50129	-1.03312	1.26624	-1.10596	1.40378	2.92202	0.277249	0.306397	0.863456	0.230243	0.617796	0.131945	0.766568	2.92202	0.277249	0.306397	0.863456	0.230243	0.617796	0.131945	0.766568	9.01262	0.191864	0.249172	0.79064	0.174355	0.470347	0.122909	0.617796	375	8	13	34	8	20	5	24
col-154	WBGene00000727	COLlagen	6.23339	-1.16877	-1.32512	-1.14388	-1.36445	-1.26077	1.09768	3.62905	0.989035	0.76405	0.582915	0.795102	0.540715	0.654732	1.12349	3.62905	0.989035	0.76405	0.582915	0.795102	0.540715	0.654732	1.12349	13.3498	0.890143	0.681268	0.480825	0.71356	0.400501	0.671041	1.02945	558	38	34	21	33	18	22	40
K02F3.9	WBGene00019332	Uncharacterized protein	6.22386	1.36442	1.35804	1.37965	-1.35916	1.08345	-1.16022	6.53126	3.89346	4.34175	4.33498	4.35775	3.45074	4.00909	3.67905	6.53126	3.89346	4.34175	4.33498	4.35775	3.45074	4.00909	3.67905	63.1975	13.7772	19.4	19.3647	19.9039	8.99982	15.8165	10.6816	1383	302	493	426	482	200	272	214
Y51H7C.9	WBGene00021787	Uncharacterized protein	6.2213	1.07313	1.08596	1.19197	1.25347	1.02597	1.25243	2.68806	0.050842	0.152669	0.16981	0.304188	0.376765	0.087835	0.375577	2.68806	0.050842	0.152669	0.16981	0.304188	0.376765	0.087835	0.375577	7.67037	0.031914	0.124031	0.126543	0.244995	0.265725	0.081575	0.266693	480	3	10	8	17	17	5	16
K10C2.1	WBGene00019617	Carboxypeptidase	6.21567	1.6311	1.84499	-1.11386	1.23122	1.67672	1.2382	6.60977	3.97386	4.6797	4.85747	3.81829	4.27395	4.71951	4.2821	6.60977	3.97386	4.6797	4.85747	3.81829	4.27395	4.71951	4.2821	66.9297	14.6175	24.869	28.725	13.3785	17.6048	26.5545	17.4192	21583	4724	9305	9317	4769	5767	6714	5132
zyx-1	WBGene00006999	Zyxin	6.21046	-1.00646	-1.04239	-1.10742	-1.15107	-1.00452	-1.09467	7.23814	4.60344	4.59415	4.54354	4.45624	4.40046	4.59694	4.47294	7.23814	4.60344	4.59415	4.54354	4.45624	4.40046	4.59694	4.47294	117.747	23.2442	23.4173	22.6794	21.5346	19.5321	24.4552	19.998	6279	1221	1389	1168	1188	1086	925	945
clec-10	WBGene00015403	C-type LECtin	6.20856	1.37852	1.05828	-1.61643	1.59041	-1.51996	-1.35147	3.48701	0.852745	1.31587	0.934469	0.159932	1.52214	0.248708	0.418219	3.48701	0.852745	1.31587	0.934469	0.159932	1.52214	0.248708	0.418219	12.2975	0.722843	1.40777	0.867395	0.124744	1.59954	0.230748	0.301896	713	42	95	51	8	95	11	16
unc-22	WBGene00006759	Twitchin	6.19468	-1.06716	-1.15725	-1.31154	-1.26171	-1.14773	-1.17028	3.85319	1.22216	1.12839	1.01146	0.830905	0.886785	1.02338	0.995307	3.85319	1.22216	1.12839	1.01146	0.830905	0.886785	1.02338	0.995307	15.0154	1.21087	1.1264	0.960012	0.755392	0.741858	1.14147	0.877784	14359	1211	1247	964	834	752	893	801
C52B11.5	WBGene00016874	Uncharacterized protein	6.18885	1.20653	1.29606	1.25245	1.54731	-1.13236	1.07767	5.7222	3.09253	3.36339	3.46666	3.41728	3.7223	2.91321	3.20045	5.7222	3.09253	3.36339	3.46666	3.41728	3.7223	2.91321	3.20045	38.0591	7.20383	9.16926	9.8851	9.76264	11.3061	7.01085	7.31628	1268	241	355	332	360	383	183	223
zipt-13	WBGene00007591	Zrt (ZRT), Irt-(IRT-) like Protein Transporter	6.18778	1.33313	1.2514	1.13991	1.27647	1.01276	-1.15552	5.69979	3.07037	3.48519	3.39392	3.25929	3.42253	3.08867	2.86183	5.69979	3.07037	3.48519	3.39392	3.25929	3.42253	3.08867	2.86183	37.5865	7.09441	9.94416	9.26933	8.59349	8.81846	7.95561	5.5895	1854	351	569	460	469	442	308	252
Y66C5A.1	WBGene00044156	Uncharacterized protein	6.18696	1.41066	-1.0805	1.10621	1.26031	1.42618	1.03153	2.89572	0.266488	0.762859	0.154782	0.412115	0.600263	0.778648	0.311273	2.89572	0.266488	0.762859	0.154782	0.412115	0.600263	0.778648	0.311273	8.83219	0.184053	0.679712	0.114599	0.347589	0.452958	0.815947	0.212406	92	2	9	2	4	5	7	3
ZC581.7	WBGene00022634	Tyrosine-protein kinase	6.18155	1.32671	1.26171	1.50742	1.13951	1.39698	1.28861	2.83132	0.203354	0.611211	0.538734	0.795433	0.391765	0.685667	0.569172	2.83132	0.203354	0.611211	0.538734	0.795433	0.391765	0.685667	0.569172	8.46733	0.141194	0.531124	0.440861	0.713677	0.278327	0.709707	0.429671	468	8	34	25	44	16	31	22
Y43F8C.13	WBGene00012834	Uncharacterized protein	6.16309	1.15454	1.05703	-1.56038	-1.15201	-1.16123	-1.02528	6.36468	3.74103	3.94835	3.82104	3.09913	3.53688	3.52538	3.70501	6.36468	3.74103	3.94835	3.82104	3.09913	3.53688	3.52538	3.70501	56.1539	12.4006	14.3521	12.9504	7.64269	9.74989	11.1671	10.9726	2652	587	787	616	399	468	414	474
F20A1.1	WBGene00017613	Uncharacterized protein	6.16199	1.49322	1.23302	2.24707	1.34049	1.03663	1.71465	6.2923	3.6689	4.24733	3.97109	4.83694	4.09166	3.7208	4.44682	6.2923	3.6689	4.24733	3.97109	4.83694	4.09166	3.7208	4.44682	53.4342	11.7476	18.1339	14.737	29.0254	15.2421	12.8007	19.6346	849	187	335	236	510	246	160	285
inx-15	WBGene00002137	Innexin	6.12835	1.41513	1.55804	1.32065	1.78801	1.60606	1.21622	5.72139	3.10589	3.60683	3.74563	3.50714	3.94425	3.78942	3.3883	5.72139	3.10589	3.60683	3.74563	3.50714	3.94425	3.78942	3.3883	38.0299	7.32634	11.0229	12.2723	10.4026	13.589	13.4561	8.40878	2029	392	683	659	614	737	563	410
Y71F9AL.2	WBGene00022108	Uncharacterized protein	6.12438	1.20478	1.15989	1.03547	1.02718	1.17948	1.12522	2.76073	0.146166	0.414942	0.360148	0.19645	0.184856	0.384322	0.316367	2.76073	0.146166	0.414942	0.360148	0.19645	0.184856	0.384322	0.316367	8.07051	0.097261	0.3359	0.277156	0.151843	0.123963	0.365111	0.215663	576	7	28	20	12	9	21	15
unc-87	WBGene00006819	Protein unc-87	6.11663	-1.21991	-1.11412	-1.21795	-1.38844	-1.46456	-1.18303	8.67339	6.06065	5.77388	5.90475	5.7762	5.58719	5.51019	5.81816	8.67339	6.06065	5.77388	5.90475	5.7762	5.58719	5.51019	5.81816	487.059	67.8909	55.1802	62.0149	58.5201	48.8215	46.7365	57.5213	25507	3612	3447	3344	3486	2595	1969	2795
C50F2.4	WBGene00016838	Uncharacterized protein	6.11653	1.34271	1.22892	1	-1.16418	-2.25161	-1.01038	4.50554	1.89282	2.31797	2.19021	1.89282	1.67351	0.721863	1.87793	4.50554	1.89282	2.31797	2.19021	1.89282	1.67351	0.721863	1.87793	21.2048	2.40195	3.79745	3.39858	2.68625	1.85777	0.752094	2.35047	550	63	115	89	77	49	16	56
tag-209	WBGene00011072	Putative protein tag-209	6.11479	1.80663	1.47987	1.87955	1.31976	1.42723	1.77049	4.94023	2.32793	3.18123	2.89339	3.23831	2.7282	2.84114	3.15207	4.94023	2.32793	3.18123	2.89339	3.23831	2.7282	2.84114	3.15207	25.983	3.66461	7.83704	6.1892	8.47206	4.91727	6.62277	7.07545	362	52	127	87	131	70	73	91
T05D4.5	WBGene00011478	Major sperm protein	6.10707	1.23732	1.11003	1.22302	1.33846	1.31831	1.12923	2.97792	0.367442	0.674661	0.518035	0.657889	0.788021	0.766136	0.54278	2.97792	0.367442	0.674661	0.518035	0.657889	0.788021	0.766136	0.54278	9.29795	0.261694	0.596416	0.421705	0.56484	0.634867	0.802244	0.409417	626	18	47	29	43	44	43	26
Y57A10A.10	WBGene00013255	Uncharacterized protein	6.10465	1.15752	-1.11226	1.05452	1.06559	1.2473	1.21847	5.60065	2.99075	3.20178	2.83725	3.06734	3.0824	3.30955	3.27582	5.60065	2.99075	3.20178	2.83725	3.06734	3.0824	3.30955	3.27582	35.6059	6.62112	7.9655	5.94313	7.46926	6.65039	9.45046	7.77358	1469	274	382	247	341	279	306	293
F35F10.5	WBGene00018055	Uncharacterized protein	6.10439	3.39395	2.82876	1.32241	1.68583	2.38594	1.598	4.38668	1.77683	3.5398	3.277	2.18	2.53029	3.03139	2.4531	4.38668	1.77683	3.5398	3.277	2.18	2.53029	3.03139	2.4531	19.9411	2.15052	10.3216	8.46831	3.57846	4.09876	7.62452	3.97205	475	52	286	203	95	100	143	87
hrg-1	WBGene00019830	Heme transporter hrg-1	6.09379	11.3008	12.0668	12.3628	9.69084	12.9126	14.5462	6.19281	3.58547	7.08383	7.17844	7.21341	6.86209	7.27618	7.44804	6.19281	3.58547	7.08383	7.17844	7.21341	6.86209	7.27618	7.44804	49.9289	11.0044	138.242	149.632	159.555	120.573	156.054	177.564	1357	300	4357	4088	4791	3327	3324	4406
clec-48	WBGene00007565	C-type LECtin	6.08439	-1.02147	1.02889	1.55837	1.05293	1.11076	1.09694	6.70608	4.10097	4.07033	4.14206	4.741	4.17538	4.25251	4.23445	6.70608	4.10097	4.07033	4.14206	4.741	4.17538	4.25251	4.23445	72.4145	16.2435	15.6346	16.853	26.8615	16.3685	18.8115	16.7562	3248	731	814	761	1332	746	662	687
cah-5	WBGene00000283	Putative carbonic anhydrase 5	6.08362	1.13025	1.15827	-1.3232	-1.09038	-1.78967	1.06994	5.87079	3.26586	3.4425	3.47783	2.86183	3.14103	2.42617	3.36339	5.87079	3.26586	3.4425	3.47783	2.86183	3.14103	2.42617	3.36339	41.2596	8.31516	9.67644	9.94742	6.27802	7.01725	4.7782	8.28285	1788	361	487	434	301	309	163	328
F16B4.4	WBGene00017506	Uncharacterized protein	6.04575	1.17278	-1.06991	1.21539	-1.30556	1.05434	-1.11397	8.86585	6.26993	6.49987	6.17245	6.55135	5.88526	6.34627	6.11422	8.86585	6.26993	6.49987	6.17245	6.55135	5.88526	6.34627	6.11422	566.346	78.5328	92.6868	75.3632	101.72	61.1666	84.3382	71.2225	7258	1009	1379	972	1441	797	848	834
T09B4.8	WBGene00020382	Uncharacterized protein	6.03883	-1.05645	-1.18081	-1.22099	1.11016	-1.11291	-1.34733	5.95189	3.35762	3.2784	3.11785	3.06957	3.50839	3.20329	2.92752	5.95189	3.35762	3.2784	3.11785	3.06957	3.50839	3.20329	2.92752	43.1798	8.97602	8.53224	7.36134	7.4769	9.5192	8.71993	5.85024	2677	558	614	459	513	600	424	332
F44A6.5	WBGene00009677	Uncharacterized protein	6.0374	1.04033	-1.33854	-1.00822	-1.70883	1.25342	-1.61248	4.09996	1.50603	1.56307	1.08537	1.49422	0.733024	1.8319	0.816748	4.09996	1.50603	1.56307	1.08537	1.49422	0.733024	1.8319	0.816748	17.3016	1.63777	1.84723	1.06229	1.7959	0.584069	2.78159	0.667757	605	58	75	38	70	21	77	22
fipr-13	WBGene00010183	FIP (Fungus-Induced Protein) Related	6.03431	-1.07753	-1.05766	1.1662	-1.38866	-2.35551	1.22121	6.01123	3.41804	3.31031	3.33717	3.63985	2.94435	2.18201	3.70635	6.01123	3.41804	3.31031	3.33717	3.63985	2.94435	2.18201	3.70635	44.5744	9.42566	8.7803	8.90073	11.5886	5.88957	3.81578	10.9823	491	104	113	99	141	66	33	111
ZK546.4	WBGene00022761	Uncharacterized protein	6.02105	1.2199	-1.10369	-1.19522	-1.12439	1.0417	1.34851	3.35312	0.763102	1.04986	0.620771	0.505823	0.593959	0.82204	1.19447	3.35312	0.763102	1.04986	0.620771	0.505823	0.593959	0.82204	1.19447	11.406	0.625834	1.02055	0.515606	0.423053	0.448404	0.866049	1.12981	242	14	26	11	10	10	15	22
cpg-7	WBGene00010723	Chondroitin proteoglycan 7	5.99458	-1.21967	-1.11131	1.62593	-1.30673	2.54317	1.8598	6.03631	3.45266	3.16617	3.3004	4.15392	3.0667	4.79928	4.34781	6.03631	3.45266	3.16617	3.3004	4.15392	3.0667	4.79928	4.34781	45.3789	9.82025	7.72674	8.61016	17.0235	6.51801	28.3001	18.3477	740	161	147	142	307	108	362	274
F22B5.5	WBGene00009043	Uncharacterized protein	5.98921	-1.18854	1.06743	-1.27419	-1.23576	-1.03323	1.14756	3.42818	0.845814	0.596624	0.939959	0.49623	0.540416	0.798648	1.04438	3.42818	0.845814	0.596624	0.939959	0.49623	0.540416	0.798648	1.04438	11.8802	0.713986	0.516253	0.874769	0.414607	0.399897	0.840722	0.932108	552	34	28	41	22	19	31	40
C39D10.8	WBGene00016535	Uncharacterized protein	5.97477	1.06003	-1.00621	-1.04794	-1.04503	-1.29986	-1.03872	5.54592	2.96703	3.05114	2.9581	2.89948	2.90349	2.58867	2.91223	5.54592	2.96703	3.05114	2.9581	2.89948	2.90349	2.58867	2.91223	34.605	6.50609	6.99627	6.54672	6.47152	5.65514	5.40795	5.7782	647	122	154	125	135	108	80	101
ZK742.3	WBGene00022813	Uncharacterized protein	5.96671	1.26626	1.22076	1.45587	1.10607	1.09143	1.27605	3.50267	0.925731	1.2663	1.21351	1.46761	1.07118	1.05195	1.27741	3.50267	0.925731	1.2663	1.21351	1.46761	1.07118	1.05195	1.27741	12.404	0.80691	1.33894	1.23387	1.74554	0.935159	1.18972	1.24378	775	51	97	78	121	60	59	71
col-169	WBGene00000742	COLlagen	5.9544	-1.02287	-1.21427	-1.14	1.10698	-1.16179	-1.19078	3.35611	0.782159	0.74954	0.502075	0.593123	0.928793	0.565809	0.530254	3.35611	0.782159	0.74954	0.502075	0.593123	0.928793	0.565809	0.530254	11.4192	0.644268	0.664449	0.408175	0.507375	0.781177	0.567159	0.395721	479	28	33	18	24	34	19	16
nep-17	WBGene00010070	NEPrilysin metallopeptidase family	5.93877	2.12668	2.02892	-1.1319	2.06707	1	1.34693	7.65566	5.0855	6.1741	6.10621	4.90675	6.13308	5.0855	5.51517	7.65566	5.0855	6.1741	6.10621	4.90675	6.13308	5.0855	5.51517	179.372	33.7075	73.2532	71.6271	30.7294	72.9799	34.9869	45.9905	37006	6967	17521	14839	7022	15301	5687	8684
Y71G12B.17	WBGene00022155	Uncharacterized protein	5.93233	1.01612	-1.26801	-1.25243	-1.23972	1.20892	-1.00256	3.28509	0.716493	0.739559	0.373923	0.391765	0.406475	0.990217	0.7128	3.28509	0.716493	0.739559	0.373923	0.391765	0.406475	0.990217	0.7128	10.9942	0.573993	0.653944	0.287336	0.328822	0.292211	1.09324	0.5558	419	22	29	11	14	12	33	20
cysl-1	WBGene00007653	Cysteine synthase 1	5.92336	1.03959	1.12196	-1.13338	-1.11172	1.03515	-1.0942	5.26963	2.70322	2.75923	2.86924	2.52259	2.55042	2.75306	2.57334	5.26963	2.70322	2.75923	2.86924	2.52259	2.55042	2.75306	2.57334	29.8256	5.15238	5.49935	6.09366	4.74045	4.17774	6.13551	4.40104	1421	246	304	292	250	203	230	192
T13F3.8	WBGene00044205	Uncharacterized protein	5.90039	1.07393	1.09749	1.06936	1.0326	1.26836	1.45372	3.18868	0.627866	0.730771	0.76207	0.724614	0.674152	0.97083	1.16762	3.18868	0.627866	0.730771	0.76207	0.724614	0.674152	0.97083	1.16762	10.3804	0.484958	0.643715	0.672518	0.637304	0.523348	1.06835	1.09193	308	15	23	21	21	16	25	30
F28B4.3	WBGene00017892	Uncharacterized protein	5.90017	3.13883	4.17342	1.44337	2.76399	3.41678	1.96049	6.43178	3.87103	5.52125	5.93226	4.40046	5.33778	5.64367	4.84224	6.43178	3.87103	5.52125	5.93226	4.40046	5.33778	5.64367	4.84224	58.7853	13.5907	45.7857	63.2906	20.6319	40.485	51.8371	27.1105	18261	4231	16501	19774	7085	12774	12625	7693
Y51H4A.7	WBGene00013103	Probable urocanate hydratase	5.88889	1.16454	-1.07475	1.04365	1.03134	1.51676	-1.18198	4.46896	1.91096	2.13072	1.80695	1.9726	1.95547	2.51195	1.66975	4.46896	1.91096	2.13072	1.80695	1.9726	1.95547	2.51195	1.66975	20.8614	2.4509	3.20446	2.39931	2.91056	2.44841	5.06514	1.95705	1950	230	348	226	301	233	372	168
myo-3	WBGene00003515	Myosin-3	5.88427	1.06263	1.08233	-1.15972	1.00784	-1.16348	-1.0459	5.31148	2.75461	2.84224	2.86876	2.54084	2.76588	2.53617	2.68987	5.31148	2.75461	2.84224	2.86876	2.54084	2.76588	2.53617	2.68987	30.4482	5.36386	5.83459	6.08885	4.79232	5.06458	5.15091	4.85918	8356	1475	1858	1681	1454	1412	1109	1219
F20H11.4	WBGene00017647	Protein-tyrosine-phosphatase	5.88011	-1.11281	1.17483	-1.08971	-1.07105	-1.09937	1.08973	3.50183	0.945985	0.791778	1.17844	0.82204	0.846954	0.809303	1.06996	3.50183	0.945985	0.791778	1.17844	0.82204	0.846954	0.809303	1.06996	12.4015	0.831726	0.719009	1.18636	0.743309	0.701085	0.851238	0.958463	773	52	52	75	52	45	42	55
spe-15	WBGene00004969	Uncharacterized protein	5.86952	1.10096	-1.12128	-1.0299	1.00226	-1.23486	1.11205	5.65692	3.10368	3.24244	2.93853	3.06118	3.10694	2.79933	3.2569	5.65692	3.10368	3.24244	2.93853	3.06118	3.10694	2.79933	3.2569	36.7111	7.28859	8.26288	6.41725	7.41607	6.81942	6.35498	7.63251	4039	810	1046	734	839	726	504	724
Y66H1A.5	WBGene00022047	Uncharacterized protein	5.86483	1.26539	1.55934	-1.00938	1.14407	1.64417	1.39489	6.29937	3.74728	4.08686	4.38822	3.73381	3.94145	4.46464	4.22743	6.29937	3.74728	4.08686	4.38822	3.73381	3.94145	4.46464	4.22743	53.6352	12.4208	15.8887	20.2078	12.4614	13.5688	22.1358	16.7135	1629	378	560	618	419	419	528	464
cah-3	WBGene00000281	Putative carbonic anhydrase 3	5.85941	1.09458	1.28009	-1.26223	-1.10518	-1.11674	-1.11248	6.62108	4.07033	4.2007	4.42657	3.73436	3.92605	3.91103	3.91654	6.62108	4.07033	4.2007	4.42657	3.73436	3.92605	3.91103	3.91654	67.3165	15.9629	17.3668	20.9052	12.463	13.3891	14.7318	12.8604	2317	551	694	724	474	468	398	405
atf-5	WBGene00000221	ATF (cAMP-dependent transcription factor) family	5.85733	1.21216	1.18434	1.04063	-1.2105	1.1786	-1.07742	7.68192	5.13168	5.40926	5.37576	5.18913	4.85608	5.36875	5.0241	7.68192	5.13168	5.40926	5.37576	5.18913	4.85608	5.36875	5.0241	183.726	34.8121	42.3292	42.439	37.8926	27.5488	42.6518	30.9234	5349	1016	1430	1243	1220	815	974	823
dod-17	WBGene00010745	Downstream Of DAF-16 (regulated by DAF-16)	5.8565	1.59653	2.35842	-1.06206	1.29958	-1.80769	-1.01305	5.98679	3.43675	4.11168	4.67457	3.34989	3.8148	2.5826	3.41804	5.98679	3.43675	4.11168	4.67457	3.34989	3.8148	2.5826	3.41804	43.9398	9.61053	16.1407	25.2252	9.24004	12.2095	5.37576	8.61074	2094	459	893	1209	487	591	201	375
F59C6.16	WBGene00077764	Uncharacterized protein	5.84299	1.10823	-1.07754	1.57064	-1.41602	1.08356	1.56943	8.03403	5.48732	5.63557	5.37958	6.13867	4.98548	5.6031	6.13756	8.03403	5.48732	5.63557	5.37958	6.13867	4.98548	5.6031	6.13756	254.365	44.9978	49.829	42.5255	76.4451	30.6977	50.3088	72.5918	2020	358	460	340	671	248	314	527
R05D7.1	WBGene00011026	Uncharacterized protein	5.8407	1.3467	-1.16132	1.18032	-1.08493	-1.2992	1.04807	3.89882	1.35268	1.78211	1.13691	1.59186	1.23507	0.975059	1.42042	3.89882	1.35268	1.78211	1.13691	1.59186	1.23507	0.975059	1.42042	15.3956	1.40436	2.28909	1.13559	1.98668	1.15388	1.07462	1.47897	307	29	53	23	44	24	17	27
vha-6	WBGene00006915	V-type proton ATPase subunit a	5.82442	2.20461	2.6059	1.07245	2.09487	2.96966	1.19707	7.81946	5.27735	6.41787	6.65913	5.37826	6.34421	6.84764	5.53685	7.81946	5.27735	6.41787	6.65913	5.37826	6.34421	6.84764	5.53685	205.87	38.6106	87.4022	105.506	43.6402	84.5181	120.277	46.6771	24834	4667	12233	12801	5819	10357	11376	5144
F25E2.2	WBGene00017780	Uncharacterized protein	5.81082	1.05806	1.1117	1.17809	1.09532	-1.08511	1.00751	6.71412	4.17538	4.2568	4.32815	4.41183	4.30673	4.05754	4.18618	6.71412	4.17538	4.2568	4.32815	4.41183	4.30673	4.05754	4.18618	72.7659	17.135	18.2215	19.2903	20.8024	18.0156	16.3012	16.105	3658	892	923	825	979	611	499	558
aqp-11	WBGene00000179	AQuaPorin or aquaglyceroporin related	5.81044	1.16667	1.14989	-1.04237	1.17434	1.13933	-1.03401	7.0478	4.50915	4.73155	4.71065	4.44929	4.741	4.69734	4.46091	7.0478	4.50915	4.73155	4.71065	4.44929	4.741	4.69734	4.46091	96.6961	21.6868	25.8508	25.9964	21.3974	25.4138	26.1019	19.8326	3772	848	1170	1020	923	1007	799	707
hrg-4	WBGene00009493	Heme transporter hrg-4	5.8058	19.9293	22.844	15.4211	15.9488	18.9499	15.7728	3.80115	1.26366	5.58048	5.7774	5.21049	5.25904	5.50777	5.24303	3.80115	1.26366	5.58048	5.7774	5.21049	5.25904	5.50777	5.24303	14.6206	1.26154	47.7475	56.2772	38.5719	37.9176	46.5969	37.0022	350	32	1323	1348	1019	919	873	806
Y47G6A.15	WBGene00021641	Uncharacterized protein	5.79566	-1.06711	-1.20129	-1.11538	1.09486	-1.36646	-1.18985	3.13632	0.60135	0.507642	0.336765	0.443821	0.732102	0.150903	0.350569	3.13632	0.60135	0.507642	0.336765	0.443821	0.732102	0.150903	0.350569	10.1204	0.459947	0.428197	0.261146	0.371765	0.583527	0.142747	0.245691	394	18	20	11	16	24	5	9
acdh-2	WBGene00015894	Acyl CoA DeHydrogenase	5.78812	1.03027	1.2878	-1.10875	-1.11808	-2.22036	1.04201	4.02661	1.49351	1.53653	1.85842	1.34458	1.33248	0.34272	1.55288	4.02661	1.49351	1.53653	1.85842	1.34458	1.33248	0.34272	1.55288	16.6314	1.614	1.79699	2.52578	1.51184	1.29751	0.32548	1.72769	613	59	91	95	62	50	12	58
F46F2.3	WBGene00009787	Uncharacterized protein	5.78288	1.56257	1.62029	-1.77711	1.4908	-4.80374	-1.24058	7.74548	5.21369	5.85761	5.90994	4.38415	5.78977	2.94953	4.90267	7.74548	5.21369	5.85761	5.90994	4.38415	5.78977	2.94953	4.90267	193.535	36.9855	58.3906	62.2446	20.3555	56.6776	7.15235	28.261	3721	713	1303	1204	433	1107	108	497
T23F6.3	WBGene00011951	Uncharacterized protein	5.78062	1.36445	-1.10154	-1.02071	1.05064	1.06093	1.05625	3.2784	0.747181	1.1955	0.607654	0.717607	0.818444	0.832509	0.826139	3.2784	0.747181	1.1955	0.607654	0.717607	0.818444	0.832509	0.826139	10.9597	0.607047	1.23557	0.504142	0.628321	0.66907	0.879233	0.678535	430	22	29	20	28	26	30	17
mpz-4	WBGene00019165	Multiple PDZ domain protein	5.77974	1.36124	1.15225	1.01916	-1.00375	1.05861	1.33842	2.71483	0.183823	0.628742	0.388272	0.211202	0.178416	0.265993	0.604358	2.71483	0.183823	0.628742	0.388272	0.211202	0.178416	0.265993	0.604358	7.82763	0.126351	0.54941	0.300914	0.161159	0.117645	0.249936	0.457411	440	8	36	17	10	7	11	24
sdz-24	WBGene00019495	SKN-1 Dependent Zygotic transcript	5.77863	1.03283	-1.04618	-1.70902	-1.79456	-1.0139	-1.04998	4.77542	2.24469	2.2913	2.17957	1.47152	1.40106	2.22478	2.17433	4.77542	2.24469	2.2913	2.17957	1.47152	1.40106	2.22478	2.17433	23.8495	3.38792	3.70292	3.37423	1.75819	1.39703	3.98295	3.11937	788	113	142	113	65	47	104	95
col-101	WBGene00000675	COLlagen	5.77659	1.86695	1.40482	-1.8643	1.06328	-2.63549	-2.51107	9.76327	7.23305	8.13373	7.72344	6.33442	7.32157	5.83498	5.90475	9.76327	7.23305	8.13373	7.72344	6.33442	7.32157	5.83498	5.90475	1112.45	152.496	285.931	214.265	87.3897	163.936	59.1918	61.1956	48830	6709	14563	9461	4241	7310	2038	2454
T02B11.3	WBGene00020155	Non-coding transcript of protein-coding gene T02B11.3b	5.77031	1.14058	1.00798	1.75534	1.02225	-1.01993	1.33765	6.68441	4.15576	4.34552	4.16722	4.96751	4.18751	4.12729	4.57546	6.68441	4.15576	4.34552	4.16722	4.96751	4.18751	4.12729	4.57546	70.9225	16.8769	19.4616	17.1547	32.1164	16.5008	17.0845	21.7463	1973	470	630	480	987	466	375	553
T01C8.2	WBGene00020143	Uncharacterized protein	5.7661	-1.06734	-1.10884	-1.1251	-1.11173	-1.2764	-1.64933	6.31338	3.78579	3.69177	3.63673	3.61573	3.63298	3.43371	3.06391	6.31338	3.78579	3.69177	3.63673	3.61573	3.63298	3.43371	3.06391	54.1736	12.7704	11.7001	11.2067	11.3389	10.5553	10.482	6.53045	612	145	154	128	142	121	93	68
C18E9.5	WBGene00007685	Uncharacterized protein	5.7509	1.17644	1.30249	-1.1094	1.25906	1.34506	1.03906	6.00539	3.4816	3.71602	3.86288	3.33182	3.81394	3.90927	3.53688	6.00539	3.4816	3.71602	3.86288	3.33182	3.81394	3.90927	3.53688	44.4357	10.11	11.9293	13.3874	9.1148	12.2082	14.705	9.47121	1653	377	515	501	375	462	429	322
M153.2	WBGene00010925	Uncharacterized protein	5.72895	-1.1129	1.12143	-1.29709	-1.09076	1.0754	-1.20176	2.93908	0.42081	0.266488	0.586148	0.045532	0.295478	0.525689	0.155667	2.93908	0.42081	0.266488	0.586148	0.045532	0.295478	0.525689	0.155667	9.09036	0.296267	0.214361	0.483955	0.028299	0.200173	0.517497	0.098226	582	19	16	32	3	13	26	6
mec-12	WBGene00003175	Detyrosinated tubulin alpha-3 chain	5.72095	1.31319	1.13469	1.07982	1.2339	1.19711	1.01075	4.30597	1.78971	2.18278	1.97201	1.90051	2.09293	2.04926	1.80513	4.30597	1.78971	2.18278	1.97201	1.90051	2.09293	2.04926	1.80513	19.1927	2.17797	3.34459	2.78884	2.69991	2.78278	3.39345	2.21514	1206	138	244	177	188	178	168	128
acs-14	WBGene00008669	fatty Acid CoA Synthetase family	5.71157	1.07836	1.36334	1.37705	1.30944	1.58116	1.27788	6.36382	3.84994	3.95878	4.29708	4.31152	4.23889	4.51092	4.20369	6.36382	3.84994	3.95878	4.29708	4.31152	4.23889	4.51092	4.20369	56.0906	13.3169	14.4266	18.7422	19.226	17.1163	22.955	16.323	4259	1013	1271	1432	1614	1320	1367	1132
ads-1	WBGene00000081	Alkyldihydroxyacetonephosphate synthase	5.70648	1.10569	1.17008	1.04213	1.17826	1.36948	1.0684	7.45503	4.94243	5.08737	5.16903	5.00196	5.17909	5.39606	5.03787	7.45503	4.94243	5.08737	5.16903	5.00196	5.17909	5.39606	5.03787	146.696	29.8632	33.3369	36.4287	33.0888	35.5772	43.3636	31.3257	12220	2493	3222	3053	3047	3011	2832	2384
adt-2	WBGene00000083	ADAMTS family	5.70642	-1.08472	-1.68858	-1.39	1.0667	-1.6741	-1.32432	4.97628	2.46369	2.34638	1.70788	1.98861	2.55684	1.7203	2.05844	4.97628	2.46369	2.34638	1.70788	1.98861	2.55684	1.7203	2.05844	26.4175	4.15067	3.8776	2.15857	2.96567	4.20379	2.45134	2.81016	2228	335	452	291	265	318	264	181
F13D11.3	WBGene00017428	Uncharacterized protein	5.69885	1.41997	1.03447	1.75844	1.15216	1.45171	1.38441	3.83231	1.32164	1.82749	1.37052	2.13593	1.52598	1.85939	1.79091	3.83231	1.32164	1.82749	1.37052	2.13593	1.52598	1.85939	1.79091	14.8594	1.35125	2.37913	1.49496	3.42924	1.60907	2.84416	2.18518	363	34	68	37	93	40	55	49
cept-1	WBGene00009057	Choline/EthanolaminePhosphoTransferase	5.67805	1.13762	1.25979	-1.48061	1.2636	-1.9029	-1.72642	5.6806	3.17521	3.36122	3.50839	2.60902	3.51275	2.24701	2.38742	5.6806	3.17521	3.36122	3.50839	2.60902	3.51275	2.24701	2.38742	37.0503	7.73981	9.14254	10.1951	5.03552	9.54562	4.06666	3.74455	2039	428	584	565	307	534	176	189
kynu-1	WBGene00015802	Kynureninase	5.66694	1.31734	1.15814	-1.01212	-1.11156	1.07486	-1.16027	6.66424	4.16167	4.5593	4.37349	4.14429	4.00909	4.26582	3.94722	6.66424	4.16167	4.5593	4.37349	4.14429	4.00909	4.26582	3.94722	69.9105	16.991	22.8554	19.9878	16.9198	14.3285	18.9952	13.2095	4665	1136	1770	1342	1248	972	994	806
lec-2	WBGene00002265	gaLECtin	5.66312	1.16797	1.0798	1.5963	1.7354	3.82731	1.81561	6.45897	3.95737	4.18137	4.06814	4.6321	4.75263	5.8937	4.81782	6.45897	3.95737	4.18137	4.06814	4.6321	4.75263	5.8937	4.81782	59.7076	14.408	17.1114	15.8114	24.7183	25.6028	61.5677	26.5435	10333	2503	3269	2756	4642	4403	8378	4122
T05C3.6	WBGene00020256	Uncharacterized protein	5.65631	1.00359	1.27342	-1.1863	1.33378	1.11939	-1.23117	4.18843	1.68857	1.69373	2.03727	1.44209	2.10409	1.85128	1.38853	4.18843	1.68857	1.69373	2.03727	1.44209	2.10409	1.85128	1.38853	17.9838	1.98409	2.12881	2.96975	1.69079	2.80891	2.82565	1.4282	1204	136	167	188	119	201	137	92
R11E3.1	WBGene00020003	Tyrosine-protein kinase	5.65142	-1.09334	1.0995	-1.26223	1.07815	1.00635	1.01291	3.06391	0.565294	0.43655	0.702139	0.229319	0.673851	0.574432	0.583796	3.06391	0.565294	0.43655	0.702139	0.229319	0.673851	0.574432	0.583796	9.73513	0.423809	0.357107	0.602627	0.17339	0.523063	0.577649	0.440303	746	33	32	47	15	41	35	31
qdpr-1	WBGene00011398	Quinoid DihydroPteridine Reductase	5.63894	1.1738	1.07138	-1.03758	-1.00144	1.02421	-1.09016	6.88055	4.38512	4.61631	4.48459	4.33189	4.38305	4.41963	4.26059	6.88055	4.38512	4.61631	4.48459	4.33189	4.38305	4.41963	4.26059	83.14	19.8546	23.7729	21.8123	19.5905	19.3021	21.3952	17.0704	2745	657	911	725	715	648	554	515
dml-1	WBGene00021871	yeast DiM Like	5.62689	1.1154	1.20358	1.03887	1.14484	-1.16196	1.30238	2.8438	0.351462	0.509021	0.618797	0.406475	0.546605	0.1349	0.732618	2.8438	0.351462	0.509021	0.618797	0.406475	0.546605	0.1349	0.732618	8.53219	0.248963	0.430191	0.513748	0.34126	0.407369	0.126337	0.57883	260	9	16	16	12	15	4	17
F26E4.5	WBGene00009160	Tyrosine-protein kinase	5.62663	1.03609	1.78473	1.06237	-1.05856	1.24162	1.04305	2.66839	0.176118	0.227274	1.01183	0.263401	0.0940153	0.488343	0.236923	2.66839	0.176118	0.227274	1.01183	0.263401	0.0940153	0.488343	0.236923	7.552	0.120668	0.179243	0.960655	0.210375	0.059517	0.477341	0.164265	500	9	14	64	16	5	25	10
gst-13	WBGene00001761	Glutathione S-Transferase	5.61418	-1.00095	1.3236	1.29194	1.11557	1.46859	1.02804	6.98727	4.4982	4.49683	4.90267	4.86773	4.65598	5.05263	4.53809	6.98727	4.4982	4.49683	4.90267	4.86773	4.65598	5.05263	4.53809	91.3944	21.5639	21.7002	29.7723	29.8561	23.6866	34.1271	21.1194	2661	630	733	872	961	701	779	562
inx-16	WBGene00002138	Innexin-16	5.61255	1.06011	1.23041	1.07504	1.35317	1.11919	-1.08109	5.76056	3.2719	3.35611	3.57104	3.37629	3.70825	3.43436	3.15942	5.76056	3.2719	3.35611	3.57104	3.37629	3.70825	3.43436	3.15942	38.9584	8.35898	9.11274	10.6769	9.45528	11.2092	10.4916	7.10572	2025	436	550	558	544	592	428	338
gba-4	WBGene00021160	Putative glucosylceramidase 4	5.58545	-4.18554	-3.62189	-7.21791	-2.48087	1.16727	-6.76533	5.73275	3.25107	1.18566	1.39433	0.39949	1.94022	3.47421	0.492912	5.73275	3.25107	1.18566	1.39433	0.39949	1.94022	3.47421	0.492912	38.2648	8.25579	1.21987	1.53863	0.335801	2.42783	10.7851	0.365977	2772	600	103	113	27	179	613	25
deb-1	WBGene00000942	DEnse Body	5.57789	-1.20062	1.0129	-1.29551	-1.38995	-1.49056	-1.13706	6.29801	3.81829	3.55451	3.83678	3.44478	3.34326	3.24244	3.63298	6.29801	3.81829	3.55451	3.83678	3.44478	3.34326	3.24244	3.63298	53.5706	13.0361	10.5178	13.1491	9.93822	8.27925	8.98306	10.229	4738	1026	1170	1077	997	957	709	848
F40A3.2	WBGene00018217	Uncharacterized protein	5.56752	1.18457	1.042	1.03951	-1.23237	1.04128	-1.18928	5.23319	2.75616	3.00052	2.81551	2.81206	2.45473	2.81452	2.50607	5.23319	2.75616	3.00052	2.81551	2.81206	2.45473	2.81452	2.50607	29.3912	5.37065	6.64926	5.80863	6.02593	3.83903	6.4479	4.1758	946	174	249	188	215	126	163	123
Y69A2AR.25	WBGene00022096	Uncharacterized protein	5.56557	1.27239	1.21522	1.02848	1.10773	-1.0417	1.10649	3.44002	0.963494	1.31103	1.24471	1.004	1.1111	0.904556	1.10948	3.44002	0.963494	1.31103	1.24471	1.004	1.1111	0.904556	1.10948	11.9849	0.860218	1.40353	1.27696	0.993764	0.990958	0.975743	1.00511	565	41	77	61	52	48	37	44
F10C1.9	WBGene00044296	Uncharacterized protein	5.56522	1.35082	1.47097	1.14821	1.62434	1.3752	1.03762	4.87671	2.40027	2.8341	2.95704	2.59966	3.10013	2.85991	2.45355	4.87671	2.40027	2.8341	2.95704	2.59966	3.10013	2.85991	2.45355	25.0596	3.93602	5.81202	6.53217	4.99585	6.79231	6.7261	3.97531	825	131	223	218	183	229	175	120
F22F4.4	WBGene00017717	Uncharacterized protein	5.56486	-1.08189	1.15072	-1.25935	-1.53383	-2.20132	-1.51925	6.78907	4.31273	4.19917	4.51527	3.98005	3.69559	3.17436	3.70937	6.78907	4.31273	4.19917	4.51527	3.98005	3.69559	3.17436	3.70937	78.0583	18.8413	17.3536	22.2899	15.0421	11.0625	8.58891	10.9967	591	150	160	179	133	90	54	80
ifp-1	WBGene00002067	Intermediate filament protein ifp-1	5.562	1.31513	1.25419	1.51204	1.81044	1.18832	1.12796	2.78856	0.312955	0.708156	0.639714	0.909453	1.1693	0.56188	0.486668	2.78856	0.312955	0.708156	0.639714	0.909453	1.1693	0.56188	0.486668	8.20271	0.221256	0.627306	0.536539	0.849683	1.06262	0.563275	0.360915	888	24	79	59	102	117	48	36
T12D8.9	WBGene00011736	Uncharacterized protein	5.55748	-1.13537	-1.03753	-1.16702	-1.56355	-1.30466	-1.30669	4.1933	1.71887	1.53571	1.66571	1.49604	1.07404	1.3352	1.33296	4.1933	1.71887	1.53571	1.66571	1.49604	1.07404	1.3352	1.33296	18.0438	2.03575	1.79612	2.07637	1.79985	0.939903	1.69371	1.32608	2972	337	344	345	329	158	220	200
C23H3.2	WBGene00016018	Uncharacterized protein	5.55544	1.01076	1.05368	-1.00619	-1.20945	-1.28943	-1.14806	6.34568	3.87178	3.88722	3.94722	3.86288	3.59742	3.50505	3.67258	6.34568	3.87178	3.88722	3.94722	3.86288	3.59742	3.50505	3.67258	55.4047	13.5918	13.721	14.4043	13.8285	10.2234	10.994	10.6571	2649	655	771	700	738	500	414	470
acox-1.2	WBGene00008565	Acyl-coenzyme A oxidase	5.54722	-1.25928	-1.72705	-2.11567	-1.26964	-1.75431	-2.61995	5.14886	2.67709	2.3445	1.88878	1.59598	2.33268	1.86619	1.28756	5.14886	2.67709	2.3445	1.88878	1.59598	2.33268	1.86619	1.28756	28.4141	5.02045	3.86863	2.60447	1.99347	3.44692	2.86952	1.25781	2621	464	414	242	204	323	208	106
F14B8.6	WBGene00017448	Uncharacterized protein	5.54413	1.09371	1.20434	1.03905	1.93545	1.41414	1.12693	4.33035	1.85939	1.98861	2.12763	1.91465	2.81206	2.35931	2.03179	4.33035	1.85939	1.98861	2.12763	1.91465	2.81206	2.35931	2.03179	19.4166	2.33313	2.81191	3.18256	2.74128	5.2608	4.50841	2.74164	936	113	158	155	147	258	171	121
elo-8	WBGene00001246	Elongation of very long chain fatty acids protein	5.54362	1.01986	1.08948	1.18547	-1.09867	-1.03352	-1.0555	3.31384	0.843006	0.87138	0.96664	1.08846	0.707243	0.795433	0.765082	3.31384	0.843006	0.87138	0.96664	1.08846	0.707243	0.795433	0.765082	11.1698	0.712262	0.799377	0.906174	1.12626	0.55867	0.834659	0.616501	453	28	25	36	40	19	25	20
vha-3	WBGene00006912	V-type proton ATPase 16 kDa proteolipid subunit 2/3	5.54166	1.72613	1.83632	1.24687	1.57177	1.90145	1.27963	7.98019	5.50987	6.29741	6.38669	5.82818	6.16226	6.43698	5.8656	7.98019	5.50987	6.29741	6.38669	5.82818	6.16226	6.43698	5.8656	243.155	45.8066	80.1492	87.7392	60.7641	74.2782	90.1028	59.641	5487	1036	2099	1992	1516	1703	1595	1230
Y49F6B.8	WBGene00021720	Uncharacterized protein	5.53644	3.70328	4.12346	2.67211	1.96915	5.36537	7.04908	2.54492	0.0759568	1.96476	2.11981	1.49394	1.05353	2.49963	2.89339	2.54492	0.0759568	1.96476	2.11981	1.49394	1.05353	2.49963	2.89339	6.86705	0.047764	2.74366	3.16409	1.79515	0.916929	5.01807	5.70855	287	2	134	133	83	39	165	218
aqp-1	WBGene00000169	AQuaPorin or aquaglyceroporin related	5.53096	-2.76425	-3.12274	-2.10857	-1.43886	-1.16955	-2.00296	6.69195	4.22442	2.75753	2.5816	3.14815	3.69949	3.99846	3.22228	6.69195	4.22442	2.75753	2.5816	3.14815	3.69949	3.99846	3.22228	71.4848	17.6722	5.48387	4.77824	7.89406	11.0932	15.6691	7.43861	2953	733	264	199	362	467	509	283
alh-12	WBGene00000118	ALdehyde deHydrogenase	5.5295	-1.1545	-1.12397	-2.08385	-1.2744	-1.27921	-1.35322	6.92741	4.46027	4.25299	4.29167	3.40102	4.11044	4.10501	4.02387	6.92741	4.46027	4.25299	4.29167	3.40102	4.11044	4.10501	4.02387	86.6366	20.822	18.1918	18.6893	9.65662	15.5188	16.8295	14.0495	6005	1446	1463	1309	743	1097	918	893
gsto-1	WBGene00016204	Glutathione transferase omega-1	5.51282	41.817	55.5602	52.4772	30.0417	70.1083	52.6032	3.86498	1.40219	6.78821	7.19817	7.11581	6.31108	7.5337	7.11927	3.86498	1.40219	6.78821	7.19817	7.11581	6.31108	7.5337	7.11927	15.1185	1.48177	113.021	152.439	149.835	82.4148	183.592	143.646	529	52	4585	5361	5791	2927	5033	4588
ZC449.8	WBGene00195189	Uncharacterized protein	5.50408	1.35464	1.02356	1.06211	-1.146	-1.12488	-1.21544	4.29708	1.83658	2.2745	1.87018	1.92351	1.63998	1.66681	1.5551	4.29708	1.83658	2.2745	1.87018	1.92351	1.63998	1.66681	1.5551	19.1386	2.28098	3.63708	2.54508	2.76507	1.80461	2.31377	1.73049	190	23	42	26	31	19	18	16
H36L18.2	WBGene00010424	Uncharacterized protein	5.4916	1.39485	1.30116	1.27865	1.04744	1.45794	1.17366	7.95684	5.49962	5.97972	5.87941	5.85424	5.56648	6.04355	5.73064	7.95684	5.49962	5.97972	5.87941	5.85424	5.56648	6.04355	5.73064	236.566	45.3548	63.5922	60.9331	61.7524	48.1401	68.5288	53.5983	2768	532	864	718	799	573	629	574
R06C1.4	WBGene00011059	Uncharacterized protein	5.49016	1.63177	1.26016	1.17445	1.66502	1.29295	1.05302	8.7557	6.29885	7.00529	6.63246	6.53084	7.03439	6.66952	6.37339	8.7557	6.29885	7.00529	6.63246	6.53084	7.03439	6.66952	6.37339	514.038	80.3618	130.562	103.682	100.348	135.753	105.688	86.2281	6087	954	1794	1235	1314	1633	982	933
acp-6	WBGene00022245	ACid Phosphatase family	5.47589	1.76138	1.22855	1.19528	-1.27096	-1.70968	-1.27366	8.65877	6.20567	7.02238	6.50263	6.46302	5.85975	5.43195	5.85669	8.65877	6.20567	7.02238	6.50263	6.46302	5.85975	5.43195	5.85669	484.169	74.8636	132.455	94.8376	95.6962	59.8226	44.2375	59.3569	25763	3992	8178	5076	5629	3234	1846	2886
C18A11.3	WBGene00015949	Uncharacterized protein	5.46465	1.29442	1.33195	-1.21368	1.60453	2.17279	1.22828	4.062	1.61187	1.98419	2.02541	1.33248	2.29402	2.73142	1.90851	4.062	1.61187	1.98419	2.02541	1.33248	2.29402	2.73142	1.90851	16.9541	1.83013	2.80294	2.93054	1.4833	3.33886	6.02473	2.42042	636	69	122	111	62	128	177	83
F42A10.9	WBGene00023489	Uncharacterized protein	5.45203	1.7409	1.81812	1.14905	1.56512	1.49644	1.25035	5.4731	3.0263	3.82614	3.88875	3.22674	3.67258	3.60784	3.34863	5.4731	3.0263	3.82614	3.88875	3.22674	3.67258	3.60784	3.34863	33.1693	6.85108	13.0865	13.69	8.40458	10.8722	11.8618	8.16762	726	151	333	302	204	242	204	164
ugt-17	WBGene00007422	UDP-GlucuronosylTransferase	5.4481	5.44314	6.68683	3.83774	3.38991	5.73147	4.79782	4.91492	2.46917	4.9136	5.21049	4.40942	4.23041	4.98807	4.73155	4.91492	2.46917	4.9136	5.21049	4.40942	4.23041	4.98807	4.73155	25.5687	4.16505	29.6256	37.5032	20.7826	17.0338	32.4744	24.6207	1915	313	2574	2824	1720	1296	1907	1684
M7.12	WBGene00010887	Uncharacterized protein	5.44603	-1.18472	-1.02054	1.04783	1.07534	1.19148	-1.30194	3.21712	0.771917	0.527373	0.742579	0.839326	0.876713	1.02467	0.391255	3.21712	0.771917	0.527373	0.742579	0.839326	0.876713	1.02467	0.391255	10.563	0.633158	0.448096	0.652959	0.765005	0.734596	1.14375	0.276522	357	22	18	23	29	26	31	9
Y37A1B.5	WBGene00012538	Non-coding transcript of protein-coding gene Y37A1B.5c	5.44145	1.44361	1.1813	-1.27147	-1.4586	-1.57007	-1.29533	7.4506	5.00661	5.5363	5.24699	4.66012	4.46202	4.35579	4.63329	7.4506	5.00661	5.5363	5.24699	4.66012	4.46202	4.35579	4.63329	145.573	31.75	46.3566	38.425	25.4377	20.5318	20.3174	22.834	6210	1453	2444	1768	1249	995	868	1004
spp-22	WBGene00044283	SaPosin-like Protein family	5.44141	1.4173	1.08186	1.30418	1.05672	1.37308	1.18819	4.20029	1.75631	2.25945	1.86982	2.13945	1.8359	2.21372	2.00507	4.20029	1.75631	2.25945	1.86982	2.13945	1.8359	2.21372	2.00507	18.0747	2.10683	3.5787	2.54503	3.43855	2.20987	3.92924	2.67985	378	45	87	54	80	47	65	52
F58G6.3	WBGene00010274	Uncharacterized protein	5.42281	5.21704	5.78764	4.0105	4.31908	4.83026	4.50007	5.01446	2.57542	4.95865	5.10839	4.5792	4.68614	4.84752	4.74536	5.01446	2.57542	4.95865	5.10839	4.5792	4.68614	4.84752	4.74536	26.8141	4.58044	30.5286	34.5797	23.702	24.2078	29.3183	24.8998	505	87	667	655	493	463	433	428
C55A6.12	WBGene00044019	Uncharacterized protein	5.41821	1.56779	1.17743	1.04668	-1.14008	1.06496	1.30534	6.08137	3.64355	4.29228	3.8792	3.70937	3.45441	3.73436	4.02798	6.08137	3.64355	4.29228	3.8792	3.70937	3.45441	3.73436	4.02798	46.6676	11.433	18.7103	13.5387	12.2331	9.04192	12.8727	14.082	1059	258	386	305	286	219	250	226
T01D1.4	WBGene00020149	1,2-dihydroxy-3-keto-5-methylthiopentene dioxygenase homolog 1	5.40656	1.16233	-1.02856	1.39167	-1.03834	1.31023	1.14288	6.65015	4.21544	4.43246	4.17481	4.69226	4.16116	4.60525	4.40811	6.65015	4.21544	4.43246	4.17481	4.69226	4.16116	4.60525	4.40811	69.1856	17.5716	20.7555	17.2292	25.9978	16.1418	24.5901	19.0985	1179	296	406	290	491	327	319	297
F52H2.6	WBGene00018718	Diminuto-like protein	5.39108	-1.12374	1.06039	-1.32701	-1.3193	1.08438	-1.3484	5.2366	2.80603	2.63772	2.89063	2.39785	2.40626	2.92291	2.37478	5.2366	2.80603	2.63772	2.89063	2.39785	2.40626	2.92291	2.37478	29.4358	5.61563	5.01722	6.17603	4.27683	3.66633	7.06413	3.71042	2157	413	427	456	347	273	406	249
lbp-7	WBGene00002259	Fatty acid-binding protein homolog 7	5.38561	-1.40559	-1.03908	-1.11999	1.12595	1.45631	-1.26181	5.75673	3.32762	2.83645	3.27232	3.16414	3.49876	3.86994	2.99213	5.75673	3.32762	2.83645	3.27232	3.16414	3.49876	3.86994	2.99213	38.8685	8.75714	5.8193	8.4127	7.99327	9.4276	14.2653	6.20917	748	169	130	163	170	185	215	110
W03D8.5	WBGene00020987	Major sperm protein	5.38414	-1.03373	-1.01145	-1.03076	1.04294	1.12194	1.00734	2.58797	0.159253	0.111397	0.142821	0.115539	0.219911	0.325249	0.16981	2.58797	0.159253	0.111397	0.142821	0.115539	0.219911	0.325249	0.16981	7.08467	0.106935	0.092355	0.106531	0.091417	0.151633	0.307382	0.109696	265	5	5	5	4	6	9	4
pbo-1	WBGene00003941	Uncharacterized protein	5.38222	1.24487	1.37017	1.1412	1.52145	1.90597	1.21699	6.30798	3.87977	4.19577	4.33413	4.07033	4.48522	4.8103	4.16309	6.30798	3.87977	4.19577	4.33413	4.07033	4.48522	4.8103	4.16309	53.9235	13.7071	17.2995	19.3599	15.956	20.8954	28.5572	15.7453	1480	377	551	535	484	583	615	395
F07A11.5	WBGene00008548	Ribokinase	5.34848	-1.0614	-1.07692	-1.36583	-1.04126	-1.2693	-1.18675	5.50025	3.08112	2.99515	2.97421	2.63133	3.02279	2.73708	2.8341	5.50025	3.08112	2.99515	2.97421	2.63133	3.02279	2.73708	2.8341	33.727	7.15249	6.63064	6.64581	5.11727	6.25659	6.04592	5.48081	1480	315	338	294	249	279	208	220
lec-10	WBGene00002273	Galectin	5.31838	1.3866	1.21167	1.1433	1.26422	1.05645	1.06058	8.4134	6.00242	6.47397	6.27941	6.19562	6.34067	6.08163	6.08727	8.4134	6.00242	6.47397	6.27941	6.19562	6.34067	6.08163	6.08727	383.649	64.9817	90.9603	81.2805	79.5244	84.2706	70.4218	69.9187	10314	1751	2838	2198	2364	2302	1485	1718
H32K16.2	WBGene00010422	Uncharacterized protein	5.29764	-1.07538	-1.50183	1.50045	-1.51094	1.49867	-1.34852	5.17543	2.77008	2.66523	2.18337	3.35548	2.17464	3.35377	2.3387	5.17543	2.77008	2.66523	2.18337	3.35548	2.17464	3.35377	2.3387	28.6483	5.42619	5.12297	3.38316	9.30144	2.99028	9.79519	3.59031	284	54	59	34	102	31	76	33
nhr-68	WBGene00003658	Nuclear Hormone Receptor family	5.28893	1.047	-1.188	-1.29436	-1.19197	-1.26998	-1.362	6.23858	3.83561	3.90187	3.58707	3.46337	3.58226	3.4908	3.38989	6.23858	3.83561	3.90187	3.58707	3.46337	3.58226	3.4908	3.38989	51.65	13.1818	13.8632	10.8088	10.0994	10.1134	10.8856	8.42807	2445	600	752	584	544	505	459	414
mpz-5	WBGene00011241	Multiple PDZ domain protein	5.28513	1.06675	1.21579	1.29329	1.09216	1.08254	1.14925	2.55042	0.148483	0.241708	0.430373	0.519525	0.275661	0.262897	0.349172	2.55042	0.148483	0.241708	0.430373	0.519525	0.275661	0.262897	0.349172	6.90117	0.099165	0.189307	0.343075	0.43611	0.182991	0.247713	0.244744	278	5	9	14	20	8	8	10
Y17D7B.4	WBGene00012452	Uncharacterized protein	5.28471	-1.05896	1.00816	1.15525	1.05855	1.14176	1.14119	5.71843	3.3166	3.23395	3.32832	3.52481	3.3987	3.50787	3.50714	5.71843	3.3166	3.23395	3.32832	3.52481	3.3987	3.50787	3.50714	37.9705	8.66143	8.19891	8.83694	10.5334	8.67992	11.0213	9.22228	794	182	199	186	244	185	181	177
Y76B12C.4	WBGene00022298	Uncharacterized protein	5.28363	-1.04364	-1.00836	1.31047	1.12684	-1.13214	1.55908	3.32044	0.918908	0.857286	0.906891	1.30899	1.09119	0.739851	1.5596	3.32044	0.918908	0.857286	0.906891	1.30899	1.09119	0.739851	1.5596	11.2059	0.799005	0.781125	0.834226	1.44877	0.962087	0.770285	1.73791	295	24	30	25	40	27	13	33
nrf-5	WBGene00003812	Nose resistant to fluoxetine protein 5	5.27828	-1.04238	1.11807	1.06508	-1.21232	-1.10356	1.05602	6.0998	3.69973	3.63985	3.86074	3.79069	3.42196	3.55757	3.77837	6.0998	3.69973	3.63985	3.86074	3.79069	3.42196	3.55757	3.77837	47.196	12.0017	11.2663	13.3742	13.0937	8.81746	11.412	11.5585	3629	925	1006	1035	1113	689	688	812
AC3.5	WBGene00007071	Aminopeptidase-like protein AC3.5	5.27763	1.21952	1.09	-1.11337	1.1205	-1.04974	-1.37159	5.32741	2.92752	3.21383	3.05185	2.77259	3.09166	2.85748	2.47167	5.32741	2.92752	3.21383	3.05185	2.77259	3.09166	2.85748	2.47167	30.6786	6.28595	8.05113	7.07102	5.81071	6.74059	6.72034	4.0663	4656	953	1415	1077	972	1031	794	564
F17A9.4	WBGene00017536	Uncharacterized protein	5.2775	1.59762	1.57247	1.19575	1.4949	1.96488	1.50794	5.3965	2.99665	3.67258	3.64968	3.25457	3.5767	3.97109	3.58923	5.3965	2.99665	3.67258	3.64968	3.25457	3.5767	3.97109	3.58923	31.9418	6.67181	11.5045	11.3047	8.55903	10.0559	15.3811	9.86514	2038	427	852	726	604	652	770	575
ZK822.4	WBGene00014091	Uncharacterized protein	5.27321	1.3338	1.37901	1.61927	1.34522	1.31689	1.45145	4.27015	1.87147	2.28702	2.3351	2.56681	2.29931	2.26861	2.40896	4.27015	1.87147	2.28702	2.3351	2.56681	2.29931	2.26861	2.40896	18.7963	2.36764	3.67699	3.84976	4.88824	3.34671	4.14823	3.80251	1189	151	270	245	342	215	206	220
R04A9.9	WBGene00195183	Non-coding transcript of protein-coding gene R04A9.9c	5.26131	-1.02591	-1.26926	1.04793	-1.07523	1.10441	-1.5335	4.21835	1.82292	1.78602	1.47894	1.89047	1.71828	1.96621	1.20609	4.21835	1.82292	1.78602	1.47894	1.89047	1.71828	1.96621	1.20609	18.2146	2.25052	2.29532	1.69173	2.68239	1.95857	3.14255	1.14377	311	41	48	31	51	33	44	20
gst-38	WBGene00001786	Glutathione S-Transferase	5.25887	-1.35585	-1.63455	-1.4159	-1.45897	-1.34956	-1.58966	4.3308	1.93605	1.49685	1.22716	1.43433	1.3911	1.50356	1.26734	4.3308	1.93605	1.49685	1.22716	1.43433	1.3911	1.50356	1.26734	19.4174	2.51286	1.72505	1.25219	1.67313	1.38021	1.97597	1.23165	568	74	59	37	55	42	46	33
C34D4.2	WBGene00016398	Serine/threonine-protein phosphatase	5.2343	-1.22615	-1.14661	-1.13556	-1.2063	-1.16117	-1.14133	2.7238	0.335799	0.0416666	0.138431	0.152397	0.0652124	0.120226	0.145081	2.7238	0.335799	0.0416666	0.138431	0.152397	0.0652124	0.120226	0.145081	7.86878	0.236887	0.03416	0.10429	0.118086	0.040078	0.110991	0.091016	362	11	2	5	6	2	5	4
Y48B6A.5	WBGene00012979	Major sperm protein	5.23383	1.02719	1.04634	-1.01891	1.0467	-1.05704	1.23187	2.53934	0.151468	0.190166	0.216825	0.124444	0.217314	0.0714332	0.452316	2.53934	0.151468	0.190166	0.216825	0.124444	0.217314	0.0714332	0.452316	6.83222	0.101148	0.145595	0.165615	0.098068	0.149668	0.064636	0.331513	405	6	11	10	7	9	3	18
ugt-12	WBGene00020592	UDP-GlucuronosylTransferase	5.2185	8.18384	9.14898	7.27055	4.704	7.79913	6.5646	5.19244	2.80881	5.84158	6.00242	5.67087	5.04269	5.77212	5.52351	5.19244	2.80881	5.84158	6.00242	5.67087	5.04269	5.77212	5.52351	28.9005	5.62021	57.7175	66.3246	54.2492	31.9417	56.5309	46.3298	2154	420	4991	4972	4469	2418	3303	3154
F39H12.3	WBGene00018214	Uncharacterized protein	5.21412	-1.04761	-1.00697	1.16784	1.08032	-1.06279	1.15801	5.19848	2.81606	2.74895	2.80603	3.03989	2.92752	2.7282	3.0277	5.19848	2.81606	2.74895	2.80603	3.03989	2.92752	2.7282	3.0277	28.9833	5.64623	5.45318	5.76757	7.28403	5.77939	6.00681	6.37487	852	167	186	171	237	173	139	172
haf-9	WBGene00001819	HAlF transporter (PGP related)	5.20238	-1.18331	-1.25365	-1.53086	-1.12118	-1.70265	-1.28472	5.30874	2.92957	2.68674	2.60344	2.31523	2.76456	2.16178	2.56811	5.30874	2.92957	2.68674	2.60344	2.31523	2.76456	2.16178	2.56811	30.4225	6.30076	5.23988	4.85298	3.98159	5.05809	3.76031	4.37646	3454	713	689	550	497	582	333	447
F46C5.10	WBGene00009785	Uncharacterized protein	5.20213	1.20853	1.14272	1.58853	-1.18895	-1.21864	1.30488	5.90069	3.52159	3.79485	3.71406	4.18928	3.2719	3.23632	3.90551	5.90069	3.52159	3.79485	3.71406	4.18928	3.2719	3.23632	3.90551	42.0205	10.4866	12.7866	11.9503	17.4841	7.80869	8.95604	12.8037	685	172	242	196	315	130	115	191
F33C8.4	WBGene00009358	Uncharacterized protein	5.1642	-1.12215	-1.20541	-1.29711	-1.45133	-1.47702	-1.32786	3.88875	1.52021	1.35395	1.25068	1.14491	0.98283	0.957518	1.1111	3.88875	1.52021	1.35395	1.25068	1.14491	0.98283	0.957518	1.1111	15.3171	1.66236	1.46562	1.28498	1.20004	0.834465	1.04962	1.01119	455	50	51	39	40	26	25	28
F17C8.9	WBGene00185014	Uncharacterized protein	5.16245	1.1405	1.09024	-1.07234	1.40772	1.13413	-1.04611	4.24948	1.88142	2.07109	2.00607	1.78066	2.37478	2.06301	1.81639	4.24948	1.88142	2.07109	2.00607	1.78066	2.37478	2.06301	1.81639	18.6118	2.38161	3.02497	2.87041	2.40502	3.56547	3.44344	2.23052	706	91	133	110	101	138	103	78
F10A3.4	WBGene00008634	Uncharacterized protein	5.16071	2.00291	2.07532	1.39181	1.96938	2.27653	1.44386	3.14613	0.778565	1.78066	1.8319	1.25552	1.75631	1.9654	1.3085	3.14613	0.778565	1.78066	1.8319	1.25552	1.75631	1.9654	1.3085	10.1617	0.640052	2.28293	2.45718	1.37058	2.04357	3.14163	1.28786	807	51	211	197	121	165	196	94
Y54F10AM.8	WBGene00021852	Putative phospholipase B-like 3	5.13887	-1.12346	-1.08439	-1.505	-1.22906	-1.36926	-1.58201	6.79644	4.43499	4.26704	4.3181	3.84523	4.13743	3.98159	3.77323	6.79644	4.43499	4.26704	4.3181	3.84523	4.13743	3.98159	3.77323	78.2985	20.4851	18.4038	19.0928	13.6424	15.8678	15.495	11.5184	6348	1665	1731	1557	1223	1307	985	853
C49A9.9	WBGene00016763	Non-coding transcript of protein-coding gene C49A9.9b	5.13291	1.48184	1.76694	1.25246	1.4878	1.49074	1.21875	4.72884	2.36906	2.93645	3.19031	2.69383	2.94224	2.94509	2.65446	4.72884	2.36906	2.93645	3.19031	2.69383	2.94224	2.94509	2.65446	23.3179	3.80472	6.33161	7.84696	5.41418	5.88155	7.13775	4.71752	1415	236	456	478	367	358	345	263
K09F6.3	WBGene00019586	Protein-tyrosine-phosphatase	5.13055	1.05456	1.04312	1.03043	-1.00129	1.05125	1.08309	2.63334	0.274231	0.350878	0.335137	0.317484	0.272369	0.346332	0.389387	2.63334	0.274231	0.350878	0.335137	0.317484	0.272369	0.346332	0.389387	7.34165	0.189357	0.284268	0.259544	0.257026	0.181497	0.328046	0.275223	1392	36	63	50	54	35	49	48
bas-1	WBGene00000239	Biogenic Amine Synthesis related	5.12662	1.06993	1.14518	-1.48327	1.13632	-1.29928	-1.30391	5.00094	2.64294	2.74045	2.83851	2.07416	2.82731	2.26522	2.26009	5.00094	2.64294	2.74045	2.83851	2.07416	2.82731	2.26522	2.26009	26.6745	4.86143	5.41798	5.94381	3.24157	5.30054	4.13368	3.36617	1920	351	451	429	259	388	234	223
C24A3.2	WBGene00016033	Uncharacterized protein	5.12207	1.01562	-1.03206	1.00379	1.03723	1.1116	-1.37432	5.93985	3.58312	3.60548	3.53759	3.58858	3.63585	3.73576	3.12441	5.93985	3.58312	3.60548	3.53759	3.58858	3.63585	3.73576	3.12441	42.9089	10.9866	11.0029	10.4323	11.0838	10.5689	12.9069	6.92211	444	114	133	109	127	112	106	66
T15B7.1	WBGene00020516	Uncharacterized protein	5.12148	-1.22762	1.03091	-2.24481	-1.51042	-1.7278	-1.39744	7.36093	5.00437	4.70851	5.0483	3.83778	4.40942	4.21544	4.52159	7.36093	5.00437	4.70851	5.0483	3.83778	4.40942	4.21544	4.52159	132.107	31.7432	25.3546	32.967	13.5868	19.6654	18.3016	20.8014	6864	1653	1529	1723	781	1038	746	988
cyp-13A2	WBGene00011676	Putative cytochrome P450 CYP13A2	5.11892	1.56724	1.48635	-1.58764	1.3174	1.17116	-1.19906	3.41895	1.06311	1.71134	1.63488	0.396227	1.46081	1.29105	0.801204	3.41895	1.06311	1.71134	1.63488	0.396227	1.46081	1.29105	0.801204	11.8332	0.984322	2.16316	2.01256	0.332087	1.49026	1.60624	0.650545	851	71	181	146	27	109	91	43
F36H9.4	WBGene00018112	Non-coding transcript of protein-coding gene F36H9.4b	5.11522	1.17392	-1.03115	-1.08554	-1.42317	1.0769	-1.09195	5.28927	2.93447	3.1658	2.89021	2.81606	2.42536	3.04135	2.80756	5.28927	2.93447	3.1658	2.89021	2.81606	2.42536	3.04135	2.80756	30.1018	6.34155	7.72254	6.17568	6.05323	3.7276	7.70101	5.37771	360	78	105	72	79	45	73	56
K03B8.6	WBGene00010524	Uncharacterized protein	5.10658	1.49115	1.31586	1.32286	1.5135	1.14799	1.09947	3.34095	0.988589	1.56502	1.38459	1.39225	1.58648	1.1877	1.1254	3.34095	0.988589	1.56502	1.38459	1.39225	1.58648	1.1877	1.1254	11.3411	0.890133	1.8505	1.52012	1.58765	1.7041	1.41125	1.03148	525	42	100	71	82	81	52	44
F42G4.6	WBGene00009643	Uncharacterized protein	5.09605	-1.05605	-1.19896	-1.16183	-1.1029	-1.05007	-1.08322	4.03994	1.69056	1.61187	1.42878	1.47416	1.54926	1.62007	1.57523	4.03994	1.69056	1.61187	1.42878	1.47416	1.54926	1.62007	1.57523	16.7461	1.98789	1.94747	1.60394	1.76388	1.64283	2.21293	1.77036	654	78	89	63	77	66	68	64
T16G12.1	WBGene00011803	Uncharacterized protein	5.0944	-1.41719	-1.44881	-2.11702	-1.4511	-1.47077	-2.32354	4.67007	2.32116	1.81813	1.78629	1.23913	1.78401	1.76459	1.10484	4.67007	2.32116	1.81813	1.78629	1.23913	1.78401	1.76459	1.10484	22.7242	3.64859	2.35968	2.34512	1.34376	2.10075	2.5648	0.99806	5986	963	722	622	392	563	530	241
ZK228.3	WBGene00013946	Uncharacterized protein	5.08714	1.24571	1.25346	-1.42685	1.06864	-1.40019	-1.02132	5.52808	3.18123	3.4982	3.50714	2.66839	3.277	2.6956	3.15079	5.52808	3.18123	3.4982	3.50714	2.66839	3.277	2.6956	3.15079	34.2203	7.75961	10.0688	10.1848	5.31234	7.84327	5.84557	7.0706	1478	336	505	443	254	345	198	279
mif-2	WBGene00003235	MIF-like protein mif-2	5.08595	1.37656	-1.06685	1.31023	1.20079	1.22605	-1.13359	6.7514	4.40488	4.86595	4.31152	4.7947	4.66886	4.6989	4.22399	6.7514	4.40488	4.86595	4.31152	4.7947	4.66886	4.6989	4.22399	75.0786	20.1089	28.6318	18.9993	27.9868	23.977	26.1367	16.683	1362	358	561	346	556	438	372	277
C42D4.2	WBGene00016595	Uncharacterized protein	5.08579	-1.26493	-1.06619	-1.83134	-1.26293	-2.02132	-1.31123	4.30007	1.95359	1.61454	1.86112	1.0807	1.61682	0.938293	1.56267	4.30007	1.95359	1.61454	1.86112	1.0807	1.61682	0.938293	1.56267	19.1474	2.57257	1.95214	2.52989	1.11523	1.75346	1.02572	1.7454	1547	209	183	206	100	144	65	129
C36F7.5	WBGene00007986	Uncharacterized protein	5.08376	-1.00294	1.12236	1.28812	1.12065	-1.02193	1.30284	2.75111	0.405216	0.40098	0.571749	0.770488	0.569556	0.373923	0.78688	2.75111	0.405216	0.40098	0.571749	0.770488	0.569556	0.373923	0.78688	8.02765	0.286457	0.324914	0.47182	0.686241	0.42766	0.353802	0.638275	362	13	17	22	35	20	13	27
ZK822.5	WBGene00014092	Uncharacterized protein	5.0794	-1.0768	1.20601	1.22779	-1.0986	-1.0145	1.03629	4.79219	2.44753	2.34078	2.71777	2.74359	2.31186	2.42676	2.49896	4.79219	2.44753	2.34078	2.71777	2.74359	2.31186	2.42676	2.49896	24.0415	4.09266	3.85705	5.32524	5.67241	3.37554	4.77909	4.1596	1583	303	359	349	407	221	245	260
F26E4.3	WBGene00009158	Uncharacterized peptidase C1-like protein F26E4.3	5.07149	1.24353	1.28568	1.14568	1.15976	1.07723	1.12338	4.40942	2.06701	2.38145	2.42955	2.26321	2.28084	2.17433	2.23486	4.40942	2.06701	2.38145	2.42955	2.26321	2.28084	2.17433	2.23486	20.1268	2.83655	3.99359	4.163	3.82275	3.30204	3.79895	3.28648	1270	180	293	265	267	212	188	190
T21D12.12	WBGene00020651	Uncharacterized protein	5.07041	1.16658	-1.08959	-1.06969	1.10165	1.30242	-1.24128	4.78753	2.44543	2.66771	2.32165	2.34823	2.5851	2.82662	2.1336	4.78753	2.44543	2.66771	2.32165	2.34823	2.5851	2.82662	2.1336	24.0108	4.08968	5.12829	3.80077	4.09589	4.32373	6.53497	2.99809	616	106	153	98	117	113	132	71
W06A7.2	WBGene00012291	Uncharacterized protein	5.05417	-1.13494	-1.21959	-1.15634	1.19005	-1.35696	-1.28161	5.68337	3.34589	3.16328	3.05949	3.13632	3.59692	2.90552	2.98794	5.68337	3.34589	3.16328	3.05949	3.13632	3.59692	2.90552	2.98794	37.1219	8.89921	7.70314	7.10824	7.83129	10.2229	6.97729	6.19155	916	220	221	178	214	257	136	140
R11D1.3	WBGene00011244	Uncharacterized protein	5.04901	2.17684	1.93885	3.30809	1.94988	2.00108	2.91844	3.5344	1.1984	2.32063	2.15359	2.9244	2.16178	2.19918	2.74359	3.5344	1.1984	2.32063	2.15359	2.9244	2.16178	2.19918	2.74359	12.6104	1.1673	3.80754	3.27667	6.59562	2.95946	3.87328	5.08359	355	33	125	93	206	85	86	131
fard-1	WBGene00022200	Fatty acyl-CoA reductase	5.04187	-1.23078	-1.12048	-1.24054	1.00243	-1.3463	-1.26338	6.21023	3.87627	3.5767	3.71215	3.56531	3.87977	3.44727	3.53898	6.21023	3.87627	3.5767	3.71215	3.56531	3.87977	3.44727	3.53898	50.7397	13.6814	10.7361	11.9398	10.8924	12.9112	10.6222	9.49278	3796	1026	932	899	901	981	623	649
fbxa-74	WBGene00021262	F-box A protein	5.03847	1.7214	1.94737	1.6939	2.19635	2.23222	1.98043	3.96904	1.63605	2.41964	2.59758	2.39641	2.77116	2.79453	2.62187	3.96904	1.63605	2.41964	2.59758	2.39641	2.77116	2.79453	2.62187	16.021	1.88018	4.11862	4.84002	4.27063	5.0911	6.33852	4.6029	681	81	204	207	201	220	212	179
del-6	WBGene00011891	DEgenerin Like	5.03233	1.05171	-1.04397	-1.26194	-1.41596	-1.07215	-1.28555	6.40353	4.0723	4.14504	4.01022	3.73666	3.57052	3.97179	3.70992	6.40353	4.0723	4.14504	4.01022	3.73666	3.57052	3.97179	3.70992	57.5468	15.9912	16.5804	15.2182	12.5056	10.0038	15.3836	10.999	4634	1291	1549	1233	1113	815	972	810
ZK930.4	WBGene00014154	Uncharacterized protein	5.0165	-1.01359	-1.18196	-1.18926	-1.28284	-1.28489	1.03136	2.87062	0.543938	0.524467	0.30276	0.29387	0.184602	0.182288	0.588483	2.87062	0.543938	0.524467	0.30276	0.29387	0.184602	0.182288	0.588483	8.68429	0.403642	0.445826	0.234568	0.23944	0.123159	0.171958	0.442761	258	13	16	7	8	4	5	13
lys-4	WBGene00003093	LYSozyme	5.01051	5.29181	5.02785	2.34431	3.93112	15.838	2.71903	7.4913	5.16634	7.5701	7.49628	6.3955	7.14128	9.15166	6.60943	7.4913	5.16634	7.5701	7.49628	6.3955	7.14128	9.15166	6.60943	152.911	35.6124	194.57	183.52	91.5622	145.77	524.879	101.463	4580	1069	6761	5529	3032	4435	12325	2776
D1054.8	WBGene00008375	Uncharacterized protein	5.00372	1.42648	1.79372	1.09574	1.17066	1.2036	1.05411	5.33324	3.01024	3.5227	3.85319	3.14214	3.23756	3.2776	3.08626	5.33324	3.01024	3.5227	3.85319	3.14214	3.23756	3.2776	3.08626	30.767	6.73572	10.1792	13.2878	7.86952	7.63675	9.2474	6.62155	1196	263	459	520	339	302	282	236
K02E11.7	WBGene00010516	Uncharacterized protein	5.00071	1.39411	1.35627	-1.05319	1.53926	1.0684	1.10373	3.70825	1.38611	1.86546	1.82576	1.31135	2.00835	1.48156	1.5285	3.70825	1.38611	1.86546	1.82576	1.31135	2.00835	1.48156	1.5285	13.869	1.45004	2.46637	2.44276	1.4511	2.56856	1.93254	1.68669	263	28	55	47	31	50	29	30
nlp-17	WBGene00003755	Neuropeptide-Like Protein	4.99902	1.38932	1.32644	1.68719	1.19082	1.32034	1.82116	4.3167	1.99505	2.46943	2.40261	2.74967	2.24701	2.39597	2.85991	4.3167	1.99505	2.46943	2.40261	2.74967	2.24701	2.39597	2.85991	19.2966	2.66774	4.3046	4.06263	5.69856	3.19644	4.63449	5.58672	226	32	59	48	74	38	43	60
Y4C6A.4	WBGene00021154	Uncharacterized protein	4.99255	1.44165	-1.10095	1.23444	1.39484	1.13185	1.55064	3.02952	0.709741	1.23746	0.570987	1.0136	1.18985	0.888419	1.3426	3.02952	0.709741	1.23746	0.570987	1.0136	1.18985	0.888419	1.3426	9.56853	0.568214	1.29647	0.471127	1.00678	1.09206	0.959722	1.34481	132	8	21	7	16	16	11	17
ucr-2.1	WBGene00012158	Ubiquinol-Cytochrome c oxidoReductase complex	4.96805	1.21147	1.08639	-1.06738	1.00647	1.10228	-1.06199	7.29316	4.98048	5.25723	5.10002	4.8864	4.98978	5.12097	4.89371	7.29316	4.98048	5.25723	5.10002	4.8864	4.98978	5.12097	4.89371	123.565	30.984	37.7582	34.2808	30.2675	30.7531	35.9899	27.9821	7113	1781	2522	1984	1924	1796	1616	1467
M88.3	WBGene00010906	Uncharacterized protein	4.96458	-1.0068	1.08817	1.06401	-1.08306	-1.14296	1.51054	2.95704	0.645367	0.635583	0.767269	0.734886	0.530254	0.452595	1.24044	2.95704	0.645367	0.635583	0.767269	0.734886	0.530254	0.452595	1.24044	9.21799	0.505352	0.555827	0.677428	0.652822	0.394333	0.438802	1.19133	456	26	32	34	36	20	18	54
unc-44	WBGene00006780	Uncharacterized protein	4.963	1.094	1.04827	1.19915	-1.02127	1.34492	1.03309	6.47576	4.16455	4.29417	4.23256	4.42657	4.13419	4.59207	4.21152	6.47576	4.16455	4.29417	4.23256	4.42657	4.13419	4.59207	4.21152	60.5886	17.0205	18.7186	17.8333	21.019	15.8086	24.3893	16.502	8544	4919	5432	4280	4381	4327	4658	3932
glt-1	WBGene00001620	Excitatory amino acid transporter	4.96162	1.26719	1.21369	-1.05866	1.05071	-1.25715	1.02701	6.57442	4.26361	4.60525	4.54301	4.18137	4.33498	3.93345	4.30206	6.57442	4.26361	4.60525	4.54301	4.18137	4.33498	3.93345	4.30206	65.1859	18.1703	23.6224	22.6788	17.3362	18.4196	14.9802	17.7111	4488	1255	1884	1569	1320	1287	810	1115
act-4	WBGene00000066	Actin-4	4.9554	-1.09304	-1.24245	-1.26415	-1.22851	-1.16762	-1.11397	9.84795	7.53895	7.4106	7.22576	7.20078	7.24204	7.31538	7.38324	9.84795	7.53895	7.4106	7.22576	7.20078	7.24204	7.31538	7.38324	1188.69	187.044	172.05	155.509	158.07	154.773	159.981	170.8	55733	8772	9344	7333	8188	7366	5875	7315
R102.2	WBGene00011289	Uncharacterized protein	4.93651	1.92187	1.24743	2.26264	1.61281	1.0068	1.53679	4.23098	1.92749	2.86999	2.24644	3.10549	2.61706	1.93727	2.54741	4.23098	1.92749	2.86999	2.24644	3.10549	2.61706	1.93727	2.54741	18.3308	2.4935	5.94758	3.56711	7.6828	4.4613	3.07167	4.31857	322	44	122	63	150	80	43	70
hsp-12.2	WBGene00002011	Heat shock protein Hsp-12.2	4.92676	1.19221	-1.04605	1.56518	1.22758	-1.13342	1.3154	5.34315	3.04251	3.29615	2.97755	3.68884	3.33832	2.86183	3.43801	5.34315	3.04251	3.29615	2.97755	3.68884	3.33832	2.86183	3.43801	30.9935	6.93203	8.6842	6.66709	12.0683	8.24844	6.7432	8.72301	480	108	156	104	207	130	82	124
elt-3	WBGene00001251	Erythroid-Like Transcription factor family	4.92139	1.50251	1.22411	1.23812	1.07313	1.75883	1.42872	4.5651	2.26604	2.85341	2.55777	2.57418	2.36786	3.08065	2.78076	4.5651	2.26604	2.85341	2.55777	2.57418	2.36786	3.08065	2.78076	21.7374	3.44896	5.87343	4.65853	4.91204	3.54288	7.91152	5.26485	576	116	187	125	147	101	171	131
sfxn-5	WBGene00044049	Sideroflexin-5	4.91637	-1.06359	1.06609	-1.09139	-1.22044	1.15159	-1.31047	4.92658	2.62899	2.54004	2.72132	2.50283	2.34159	2.83262	2.2389	4.92658	2.62899	2.54004	2.72132	2.50283	2.34159	2.83262	2.2389	25.7839	4.81748	4.61676	5.33549	4.66356	3.4748	6.56296	3.29582	971	171	205	194	201	133	189	111
Y71H10B.1	WBGene00022201	Uncharacterized protein	4.91623	1.0111	1.02151	-1.25141	1.10761	-1.05448	-1.27132	6.62461	4.32706	4.34298	4.35775	4.0035	4.4745	4.25053	3.98073	6.62461	4.32706	4.34298	4.35775	4.0035	4.4745	4.25053	3.98073	67.4584	19.0698	19.4312	19.7836	15.2456	20.7129	18.808	13.6326	5256	1491	1759	1552	1315	1641	1151	972
col-138	WBGene00000711	COLlagen	4.91365	1.06125	1.23965	1.06374	1.58663	1.13602	1.29913	2.37669	0.0798959	0.16566	0.38983	0.169038	0.745858	0.263879	0.457446	2.37669	0.0798959	0.16566	0.38983	0.169038	0.745858	0.263879	0.457446	6.08012	0.050813	0.131655	0.302975	0.130888	0.59654	0.248192	0.334426	239	3	6	12	6	24	8	12
Y51A2D.18	WBGene00013083	Uncharacterized protein	4.91034	-1.0674	-1.12497	-1.37667	-1.19201	-1.62286	-1.45827	4.30089	2.00507	1.91096	1.83518	1.54389	1.75167	1.30653	1.46081	4.30089	2.00507	1.91096	1.83518	1.54389	1.75167	1.30653	1.46081	19.155	2.69272	2.60772	2.46316	1.88547	2.03619	1.63996	1.55003	1471	208	233	191	160	159	99	109
F54B11.11	WBGene00010034	Uncharacterized protein	4.90933	1.19361	1.03933	-1.17866	-1.01021	1.27564	-1.04772	2.75161	0.456088	0.711417	0.51174	0.218943	0.441426	0.807306	0.388828	2.75161	0.456088	0.711417	0.51174	0.218943	0.441426	0.807306	0.388828	8.02771	0.326192	0.629816	0.418189	0.166633	0.318397	0.84985	0.275005	670	28	61	36	16	27	56	21
zmp-3	WBGene00016283	Zinc MetalloProtease	4.897	1.33545	1.21076	1.10996	1.04955	1.15192	-1.00125	3.59166	1.29976	1.71708	1.57567	1.45026	1.36953	1.5038	1.29796	3.59166	1.29976	1.71708	1.57567	1.45026	1.36953	1.5038	1.29796	13.0645	1.31038	2.17386	1.88187	1.70794	1.35128	1.97656	1.27156	1056	107	204	153	153	111	126	94
ugt-16	WBGene00013901	UDP-glucuronosyltransferase	4.88468	20.1851	35.3816	23.072	7.49427	26.8884	28.3401	2.81726	0.528993	4.86421	5.67392	5.05706	3.43478	5.27791	5.35376	2.81726	0.528993	4.86421	5.67392	5.05706	3.43478	5.27791	5.35376	8.39582	0.388099	28.5997	52.5169	34.4456	8.89497	40.1363	40.4426	626	29	2473	3937	2838	674	2346	2754
M176.9	WBGene00014813	Non-coding transcript of protein-coding gene M176.9a	4.87217	1.20202	-1.08588	1.29603	1.0961	1.11535	1.18552	2.46917	0.184602	0.45006	0.0657403	0.558696	0.316981	0.342099	0.430121	2.46917	0.184602	0.45006	0.0657403	0.558696	0.316981	0.342099	0.430121	6.48646	0.126985	0.373848	0.048162	0.469022	0.21621	0.325183	0.312766	497	11	34	4	43	19	21	24
gta-1	WBGene00001794	GABA TransAminase family	4.86946	-1.33158	-1.38133	-1.38906	-1.5459	-1.15942	-1.5539	8.52775	6.24398	5.83084	5.77792	5.76987	5.61554	6.03058	5.60809	8.52775	6.24398	5.83084	5.77792	5.76987	5.61554	6.03058	5.60809	420.013	77.1363	57.2363	56.2788	58.2025	49.9863	67.8831	48.8067	21441	3949	3389	2911	3258	2626	2738	2307
ZK228.4	WBGene00013947	Uncharacterized protein	4.8671	1.45613	1.59238	1.1341	1.00809	1.16202	1.41292	6.08972	3.80666	4.3488	4.47784	3.98821	3.81829	4.0233	4.30534	6.08972	3.80666	4.3488	4.47784	3.98821	3.81829	4.0233	4.30534	47.0221	12.9395	19.4748	21.7576	15.1019	12.2313	15.95	17.7445	2012	551	960	936	711	530	532	695
F42A10.6	WBGene00018342	Uncharacterized protein	4.86657	1.01888	-1.184	-3.06975	1.44778	-1.63816	-1.76877	7.21834	4.93544	4.96242	4.69177	3.31732	5.46928	4.22336	4.11269	7.21834	4.93544	4.96242	4.69177	3.31732	5.46928	4.22336	4.11269	115.251	29.7299	30.6263	25.585	8.99712	44.6254	18.3918	15.1298	2842	735	877	635	246	1118	356	341
aco-1	WBGene00000040	Probable cytoplasmic aconitate hydratase	4.86186	-1.11707	-1.17999	-1.29753	1.00598	-1.09643	-1.29571	7.45283	5.17132	5.0116	4.93255	4.79555	5.17992	5.03852	4.79757	7.45283	5.17132	5.0116	4.93255	4.79555	5.17992	5.03852	4.79757	145.801	35.7807	31.4827	30.413	27.9893	35.6088	33.799	26.1485	18035	4435	4519	3784	3827	4474	3278	2955
K10D11.5	WBGene00010749	Uncharacterized protein	4.8586	2.38616	2.11632	2.30144	2.53209	1.91724	1.59582	3.91019	1.62965	2.88434	2.71121	2.83218	2.96997	2.56868	2.30395	3.91019	1.62965	2.88434	2.71121	2.83218	2.96997	2.56868	2.30395	15.5211	1.86535	6.04441	5.28298	6.14653	6.03349	5.29791	3.49794	1075	130	486	368	471	425	288	222
gst-4	WBGene00001752	Glutathione S-transferase 4	4.85628	1.59323	1.8908	1.47917	-1.03355	1.19934	1.51451	7.57445	5.2946	5.96656	6.2136	5.85939	5.24699	5.55684	5.89345	7.57445	5.2946	5.96656	6.2136	5.85939	5.24699	5.55684	5.89345	166.415	39.0107	63.0893	77.3689	61.9469	37.6364	48.6038	60.6704	4822	1133	2121	2255	1984	1108	1105	1606
F26C11.1	WBGene00009146	Putative acid phosphatase F26C11.1	4.85568	2.23572	2.37644	1.28889	1.44594	2.39937	1.57446	3.77499	1.49532	2.65606	2.74412	1.86145	2.02732	2.75797	2.15017	3.77499	1.49532	2.65606	2.74412	1.86145	2.02732	2.75797	2.15017	14.3759	1.62098	5.07686	5.46276	2.61478	2.60824	6.16254	3.05528	874	99	358	334	176	161	294	170
ZC581.3	WBGene00022633	Uncharacterized protein	4.84905	-1.07379	-1.00951	1.07567	-1.25178	-1.07956	-1.00911	3.69949	1.42179	1.31908	1.40814	1.52703	1.09782	1.31135	1.40871	3.69949	1.42179	1.31908	1.40814	1.52703	1.09782	1.31135	1.40871	13.8315	1.50393	1.41491	1.55952	1.84925	0.97108	1.65063	1.45712	1334	146	159	152	198	96	125	129
moa-1	WBGene00020116	Modifier Of Apl-1 activity	4.84726	-1.05678	-1.00635	-1.03322	-1.01669	1.03021	-1.03975	2.3997	0.122529	0.0428554	0.113393	0.075387	0.0986463	0.165467	0.0662959	2.3997	0.122529	0.0428554	0.113393	0.075387	0.0986463	0.165467	0.0662959	6.17508	0.080727	0.034761	0.084358	0.059477	0.062748	0.155126	0.039724	1066	14	7	15	12	12	21	7
asp-13	WBGene00017881	ASpartyl Protease	4.84706	1.14717	1.31855	-1.23676	-1.44175	1.02128	-1.52569	8.27528	5.99817	6.19625	6.39713	5.69161	5.47035	6.02856	5.38872	8.27528	5.99817	6.19625	6.39713	5.69161	5.47035	6.02856	5.38872	325.584	64.7754	74.6443	88.3436	55.1677	44.6651	67.696	41.6038	17688	3526	4705	4828	3313	2465	2884	2065
R04B5.5	WBGene00011003	Uncharacterized protein	4.84668	1.23463	1.27364	1.29953	-1.20311	1.29015	1.45427	4.47087	2.19387	2.49795	2.54283	2.57186	1.9271	2.5614	2.73417	4.47087	2.19387	2.49795	2.54283	2.57186	1.9271	2.5614	2.73417	20.8871	3.20746	4.42799	4.61685	4.90503	2.40334	5.26405	5.04794	1013	156	250	226	263	119	201	224
mec-17	WBGene00003178	Alpha-tubulin N-acetyltransferase 1	4.84594	-1.20121	-1.26528	-1.18866	1.04603	-1.00961	-1.0794	4.53527	2.25849	1.994	1.91904	2.00915	2.32341	2.24469	2.14826	4.53527	2.25849	1.994	1.91904	2.00915	2.32341	2.24469	2.14826	21.4807	3.43105	2.82326	2.6714	3.03632	3.41565	4.05179	3.04891	640	103	102	86	103	104	110	87
cbl-1	WBGene00007533	Cystathionine Beta Lyase	4.8414	1.6953	1.93731	-1.21481	1.38343	1.15977	1.22269	6.12066	3.84523	4.60677	4.79928	3.5645	4.31348	4.05907	4.13529	6.12066	3.84523	4.60677	4.79928	3.5645	4.31348	4.05907	4.13529	47.7702	13.284	23.658	27.5746	10.8877	18.1839	16.3212	15.4169	2996	819	1716	1734	754	1150	796	880
B0310.1	WBGene00015137	Uncharacterized protein	4.83486	-1.36267	-1.32575	-1.5211	-1.81755	-1.47653	-1.59497	3.25063	0.977154	0.530716	0.57034	0.37204	0.115156	0.414942	0.303629	3.25063	0.977154	0.530716	0.57034	0.37204	0.115156	0.414942	0.303629	10.7904	0.875248	0.451309	0.470788	0.307932	0.072126	0.403166	0.205311	441	36	22	19	13	3	13	8
C46A5.1	WBGene00016698	Uncharacterized protein	4.82897	2.13138	4.21195	4.03984	3.04882	7.5535	4.70803	2.70769	0.435973	1.52776	2.51046	2.45027	2.04423	3.35312	2.6711	2.70769	0.435973	1.52776	2.51046	2.45027	2.04423	3.35312	2.6711	7.79298	0.30761	1.77715	4.48544	4.47704	2.65045	9.78961	4.78556	541	22	144	313	344	187	533	304
C16D2.1	WBGene00007633	Uncharacterized protein	4.8289	1.05156	1.07997	1.56162	1.96048	1.87314	1.23654	2.84315	0.571456	0.643985	0.682448	1.2145	1.54266	1.47691	0.877763	2.84315	0.571456	0.643985	0.682448	1.2145	1.54266	1.47691	0.877763	8.52787	0.429219	0.56396	0.579379	1.30339	1.63701	1.92248	0.738931	233	9	18	12	29	34	30	18
lgc-34	WBGene00020836	Ligand-Gated ion Channel	4.82881	-1.15309	1.06416	-1.13338	-1.4323	-1.1864	-1.19576	3.50913	1.23746	1.03195	1.32717	1.05684	0.719131	0.990875	0.979536	3.50913	1.23746	1.03195	1.32717	1.05684	0.719131	0.990875	0.979536	12.4368	1.23369	0.995441	1.41573	1.07606	0.569658	1.09396	0.855136	678	68	63	78	65	32	47	43
F42A8.1	WBGene00009626	Uncharacterized protein	4.8178	1.57872	1.49277	1.02914	1.26258	-1.75609	-1.07216	6.37882	4.11044	4.76919	4.68843	4.15188	4.44682	3.29807	4.00992	6.37882	4.11044	4.76919	4.68843	4.15188	4.44682	3.29807	4.00992	56.712	16.3723	26.5302	25.5047	17.0195	20.244	9.38058	13.8983	2931	848	1591	1326	973	1063	381	657
aat-4	WBGene00000005	Amino Acid Transporter	4.81325	1.02007	-1.01188	-1.43221	1.21003	-1.13647	-1.01341	3.83432	1.56731	1.59598	1.55027	1.04907	1.84236	1.38276	1.54809	3.83432	1.56731	1.59598	1.55027	1.04907	1.84236	1.38276	1.54809	14.8634	1.73897	1.91606	1.83874	1.06169	2.22779	1.7608	1.72005	1094	130	165	136	87	168	103	117
F45D3.3	WBGene00009723	Uncharacterized protein	4.80868	-1.2913	-1.45226	-1.33593	-1.42484	-1.51809	-1.25802	6.4077	4.14206	3.77323	3.60376	3.72422	3.63125	3.5398	3.8109	6.4077	4.14206	3.77323	3.60376	3.72422	3.63125	3.5398	3.8109	57.6842	16.7618	12.5172	10.922	12.3842	10.5232	11.3171	11.8651	1905	555	480	363	452	353	293	358
lron-3	WBGene00007261	eLRR (extracellular Leucine-Rich Repeat) ONly	4.80475	1.07288	1.0505	1.2957	1.31507	1.13525	1.06504	5.83498	3.57052	3.672	3.64159	3.94425	3.96566	3.75353	3.66143	5.83498	3.57052	3.672	3.64159	3.94425	3.96566	3.75353	3.66143	40.4821	10.8714	11.4943	11.246	14.6476	13.8082	13.0706	10.5977	1135	296	331	350	422	361	307	262
C25F9.10	WBGene00044291	Uncharacterized protein	4.80061	1.57519	1.38712	1.58508	1.87816	1.7142	1.31309	3.40718	1.14396	1.79949	1.61606	1.80852	2.05328	1.92149	1.53692	3.40718	1.14396	1.79949	1.61606	1.80852	2.05328	1.92149	1.53692	11.7367	1.09235	2.32553	1.97114	2.47529	2.66984	3.02657	1.70109	243	23	57	41	57	56	49	33
T04F3.1	WBGene00011436	Uncharacterized protein	4.8005	1.37757	1.24723	1.03242	1.3622	1.1823	1.07313	3.84809	1.5849	2.04703	1.90363	1.63093	2.03084	1.82649	1.68672	3.84809	1.5849	2.04703	1.90363	1.63093	2.03084	1.82649	1.68672	14.9826	1.77556	2.96612	2.63877	2.05368	2.61434	2.76936	1.98809	7221	857	1658	1278	1095	1259	1044	876
T03F6.10	WBGene00185005	Uncharacterized protein	4.79946	1.22298	1.22324	-1.20188	1.68061	-1.53217	1.39787	3.54568	1.2828	1.5732	1.57351	1.01751	2.03179	0.667227	1.76604	3.54568	1.2828	1.5732	1.57351	1.01751	2.03179	0.667227	1.76604	12.6807	1.28574	1.87242	1.87891	1.01359	2.61713	0.686755	2.13983	142	15	25	22	13	30	6	22
lev-11	WBGene00002978	Tropomyosin isoforms a/b/d/f	4.794	-1.19335	-1.40838	-1.49275	-1.31808	-1.56892	-1.04679	9.75331	7.49208	7.23706	6.99804	6.91411	7.09364	6.8423	7.42611	9.75331	7.49208	7.23706	6.99804	6.91411	7.09364	6.8423	7.42611	1106.37	181.978	152.37	133.071	131.494	141.457	119.787	174.66	39374	5866	5789	4659	5049	4662	3317	5125
ugt-26	WBGene00015695	UDP-glucuronosyltransferase	4.7939	1.133	-1.03682	1.09901	-1.222	-1.14145	1.12768	5.00661	2.74541	2.92556	2.69324	2.88162	2.45617	2.55455	2.91877	5.00661	2.74541	2.92556	2.69324	2.88162	2.45617	2.55455	2.91877	26.7371	5.31895	6.27841	5.21045	6.37617	3.85335	5.22394	5.79993	1974	394	538	387	521	289	303	392
dsc-4	WBGene00001099	Defecation Suppressor of Clk-1	4.78771	-1.11913	-1.03041	-1.79233	-1.38084	-1.19103	-1.40396	5.80439	3.54505	3.38268	3.50183	2.70322	3.07951	3.29284	3.05556	5.80439	3.54505	3.38268	3.50183	2.70322	3.07951	3.29284	3.05556	39.8655	10.6863	9.31114	10.1491	5.47297	6.63737	9.35948	6.48349	4959	1332	1344	1270	753	839	913	737
F37C4.6	WBGene00018146	Uncharacterized protein	4.78493	-1.38894	-1.17941	-1.60339	-1.48636	-1.69485	-1.38105	5.59101	3.33251	2.85853	3.09445	2.65139	2.76073	2.57136	2.86674	5.59101	3.33251	2.85853	3.09445	2.65139	2.76073	2.57136	2.86674	35.3478	8.78694	5.88519	7.25734	5.20817	5.04549	5.32328	5.6107	1933	514	405	394	282	323	237	329
Y105C5B.5	WBGene00013647	Non-coding transcript of protein-coding gene Y105C5B.5b	4.78393	1.70812	1.35604	1.88467	1.01563	1.8824	1.32315	7.29544	5.03725	5.80966	5.47665	5.95156	5.05963	5.94982	5.44122	7.29544	5.03725	5.80966	5.47665	5.95156	5.05963	5.94982	5.44122	123.964	32.6542	56.5723	45.4	66.8638	32.4079	64.0392	43.4303	2114	559	1140	792	1261	572	857	678
hpo-34	WBGene00009259	Non-coding transcript of protein-coding gene hpo-34	4.78337	1.27837	1.50175	-1.18773	1.18993	1.41109	1.15094	7.28692	5.0289	5.3832	5.61554	4.78068	5.27978	5.52571	5.2317	7.28692	5.0289	5.3832	5.61554	4.78068	5.27978	5.52571	5.2317	122.978	32.4319	41.3187	50.4197	27.7408	38.4552	47.3787	36.6425	18138	4868	6961	7500	4480	5972	5824	4886
T24A6.20	WBGene00020756	Uncharacterized protein	4.78054	1.14306	1.03052	-1.06258	1.20705	-1.20822	-1.20314	4.40735	2.15017	2.34307	2.19354	2.0626	2.42165	1.87729	1.88337	4.40735	2.15017	2.34307	2.19354	2.0626	2.42165	1.87729	1.88337	20.1065	3.07249	3.86267	3.41172	3.21022	3.71735	2.90685	2.3685	869	133	194	149	154	164	99	94
Y53F4B.11	WBGene00013158	Uncharacterized protein	4.77987	-1.65961	-1.63445	-1.6866	-1.68126	-1.69606	-1.76304	3.57456	1.31759	0.586745	0.608779	0.563473	0.568042	0.555398	0.499527	3.57456	1.31759	0.586745	0.608779	0.563473	0.568042	0.555398	0.499527	12.9387	1.34401	0.508199	0.505327	0.47541	0.427209	0.556249	0.369531	387	31	20	13	9	15	16	12
clec-67	WBGene00018971	C-type LECtin	4.77157	-1.0551	1.60778	-1.66098	-1.01867	1.12784	-1.10868	4.75505	2.50058	2.42321	3.18565	1.76855	2.4739	2.67415	2.35175	4.75505	2.50058	2.42321	3.18565	1.76855	2.4739	2.67415	2.35175	23.5997	4.28465	4.13559	7.80146	2.37052	3.90921	5.75734	3.63788	1539	280	313	512	171	259	295	217
ZK512.7	WBGene00013986	Uncharacterized protein	4.76768	1.10266	-1.02552	-1.03583	-1.18179	-1.74407	-1.14273	7.25022	4.99693	5.13792	4.96058	4.94615	4.75596	4.19447	4.80445	7.25022	4.99693	5.13792	4.96058	4.94615	4.75596	4.19447	4.80445	119.057	31.5426	34.6044	31.0815	31.71	25.6381	18.0434	26.3333	2355	626	795	619	694	516	280	476
R12C12.9	WBGene00020029	Uncharacterized protein	4.76352	-1.41401	-1.65545	-2.33745	-1.24485	-1.79978	-2.50948	5.74149	3.48946	2.98966	2.76223	2.26453	3.17349	2.64164	2.16207	5.74149	3.48946	2.98966	2.76223	2.26453	3.17349	2.64164	2.16207	38.4733	10.2049	6.61182	5.53551	3.82622	7.20733	5.63855	3.08663	1345	358	268	196	148	256	155	99
irg-5	WBGene00009429	Infection Response Gene	4.75507	-7.87645	-6.44971	-6.60637	-1.86587	-18.4205	-5.72462	7.22319	4.97373	1.99618	2.2845	2.24987	4.07388	0.770488	2.45655	7.22319	4.97373	1.99618	2.2845	2.24987	4.07388	0.770488	2.45655	116.044	30.7847	2.82817	3.6787	3.77076	15.0812	0.80804	3.9856	5561	1479	158	178	200	735	31	175
F02D8.4	WBGene00008521	Uncharacterized protein	4.75041	1.21331	1.20912	1.29318	1.1375	1.20975	1.19318	5.27025	3.0222	3.30114	3.29615	3.39312	3.20806	3.29691	3.277	5.27025	3.0222	3.30114	3.29615	3.39312	3.20806	3.29691	3.277	29.8317	6.83272	8.71425	8.58953	9.58187	7.45385	9.37157	7.77713	1866	429	633	541	663	474	460	445
aqp-10	WBGene00000178	Putative aquaporin-10	4.74564	-1.10224	-1.01308	1.00812	-1.04044	1.0711	-1.09951	7.09738	4.85078	4.71034	4.83202	4.86245	4.79358	4.94987	4.71391	7.09738	4.85078	4.71034	4.83202	4.86245	4.79358	4.94987	4.71391	101.751	28.0332	25.388	28.1665	29.7145	26.2528	31.5325	24.3253	3983	1100	1153	1109	1286	1044	968	870
pfn-3	WBGene00003991	Profilin-3	4.7439	-1.39246	-1.16242	1.10757	-1.27899	-2.02309	-1.21475	5.9859	3.73983	3.26219	3.5227	3.88722	3.38482	2.72327	3.45917	5.9859	3.73983	3.26219	3.5227	3.88722	3.38482	2.72327	3.45917	43.9219	12.3755	8.42757	10.3519	14.0395	8.59117	5.99218	8.85801	777	220	173	185	275	155	84	144
F46A9.1	WBGene00009754	Uncharacterized protein	4.73925	-1.72122	-1.11055	-1.4887	-1.5207	-1.03727	-1.6682	3.09383	0.849169	0.0657403	0.697893	0.275115	0.244431	0.79638	0.110873	3.09383	0.849169	0.0657403	0.697893	0.275115	0.244431	0.79638	0.110873	9.89255	0.718974	0.054042	0.597139	0.221096	0.165928	0.836138	0.068638	316	23	2	20	8	6	21	2
nrfl-1	WBGene00006438	NHERF (mammalian Na/H Exchange Regulatory Factor) Like	4.73589	1.14146	1.34953	-1.16172	1.16481	1.35454	-1.09354	6.82564	4.582	4.77289	5.01446	4.36574	4.8021	5.01981	4.45299	6.82564	4.582	4.77289	5.01446	4.36574	4.8021	5.01981	4.45299	79.8577	22.9164	26.6351	32.139	20.0673	26.4297	33.4168	19.7469	5391	1551	2045	2110	1472	1801	1741	1207
T07A5.1	WBGene00011554	Uncharacterized protein	4.73168	-1.09893	-1.36156	-1.28106	-1.29327	-1.15391	-1.26115	2.82565	0.583296	0.4472	0.138035	0.225959	0.21227	0.376765	0.248561	2.82565	0.583296	0.4472	0.138035	0.225959	0.21227	0.376765	0.248561	8.44273	0.440557	0.371299	0.104114	0.170575	0.144742	0.355809	0.171596	447	24	23	6	10	8	15	9
cpn-3	WBGene00000779	CalPoNin	4.73122	-1.16059	-1.23937	-1.17424	-1.41051	-1.39996	-1.30854	9.00986	6.76765	6.5528	6.45805	6.53593	6.27144	6.28226	6.3797	9.00986	6.76765	6.5528	6.45805	6.53593	6.27144	6.28226	6.3797	646.674	110.843	95.8795	92.0334	100.629	80.398	81.13	86.565	12882	2213	2216	1844	2216	1627	1267	1576
F18F11.1	WBGene00017574	Uncharacterized protein	4.72374	1.06792	-1.0611	1.21976	-1.08792	1.28277	-1.07736	5.33906	3.09913	3.19393	3.01357	3.38573	2.97755	3.45839	2.99163	5.33906	3.09913	3.19393	3.01357	3.38573	2.97755	3.45839	2.99163	30.9017	7.26652	7.92672	6.87266	9.53528	6.05913	10.6804	6.20689	909	215	271	204	310	181	247	167
acbp-3	WBGene00009818	Acyl-CoA-binding protein homolog 3	4.70875	1.02752	1.61146	1.86878	1.28285	2.26747	1.12092	5.34906	3.11372	3.15288	3.80209	4.01582	3.47307	4.2948	3.2784	5.34906	3.11372	3.15288	3.80209	4.01582	3.47307	4.2948	3.2784	31.0957	7.37079	7.6173	12.7863	15.3362	9.19118	19.4111	7.78519	507	121	145	210	277	153	249	116
R17.3	WBGene00011269	Uncharacterized protein	4.70001	1.09669	1.1445	-1.128	1.10203	-1.06583	1.14774	3.66041	1.42775	1.5609	1.62247	1.25398	1.56791	1.33577	1.62655	3.66041	1.42775	1.5609	1.62247	1.25398	1.56791	1.33577	1.62655	13.588	1.51746	1.84323	1.98002	1.36807	1.67127	1.69372	1.87675	578	65	88	83	63	71	58	77
ugt-22	WBGene00007455	UDP-glucuronosyltransferase	4.69824	1.80079	1.97123	1.18202	1.03888	1.07869	1.38474	7.51438	5.28226	6.13089	6.26135	5.52351	5.33729	5.39154	5.75187	7.51438	5.28226	6.13089	6.26135	5.52351	5.33729	5.39154	5.75187	156.368	38.7442	70.7888	80.3102	48.5717	40.4695	43.2543	54.4795	11653	2894	6121	6020	4002	3064	2528	3709
ucr-2.2	WBGene00011679	Ubiquinol-Cytochrome c oxidoReductase complex	4.67902	1.21452	1.01349	1.00714	1.01548	1.11754	-1.04456	6.90209	4.67588	4.95626	4.69521	4.68614	4.69805	4.8362	4.61298	6.90209	4.67588	4.95626	4.69521	4.68614	4.69805	4.8362	4.61298	84.5983	24.6966	30.4656	25.6969	25.8831	24.4667	29.0915	22.4064	4985	1459	2083	1523	1686	1465	1344	1206
C55A6.3	WBGene00008332	Uncharacterized protein	4.67753	-1.15273	1.35781	1.308	-1.1484	-1.2593	1.06718	3.24244	1.01669	0.811639	1.45797	1.40405	0.817065	0.684067	1.11049	3.24244	1.01669	0.811639	1.45797	1.40405	0.817065	0.684067	1.11049	10.7158	0.923031	0.738355	1.65636	1.61196	0.667097	0.706399	1.0097	375	33	30	59	63	24	20	33
T06C10.3	WBGene00020289	Tyrosine-protein kinase	4.67468	1.1328	1.0386	1.14983	1.07369	-1.00084	1.02687	2.34274	0.11787	0.297767	0.172503	0.319294	0.220454	0.116662	0.156117	2.34274	0.11787	0.297767	0.172503	0.319294	0.220454	0.116662	0.156117	5.90462	0.077039	0.240888	0.127914	0.257937	0.151993	0.108045	0.09845	459	6	22	10	23	12	7	7
calu-1	WBGene00019760	CALUmenin (calcium-binding protein) homolog	4.67079	-1.14525	-1.27517	-1.19007	-1.19971	-1.20338	-1.27839	8.92098	6.69731	6.50165	6.34662	6.44627	6.43463	6.43022	6.34299	8.92098	6.69731	6.50165	6.34662	6.44627	6.43463	6.43022	6.34299	597.312	105.396	92.7672	85.1095	94.7014	90.9166	89.5021	84.9059	26198	4629	4709	3757	4594	4053	3076	3404
pacs-1	WBGene00015116	Phosphoribosylaminoimidazole-succinocarboxamide synthase	4.67025	-1.75683	-1.52468	-1.15919	-1.92937	1.07233	1.03911	6.43749	4.21399	3.40102	3.60548	4.00088	3.26586	4.31474	4.26933	6.43749	4.21399	3.40102	3.60548	4.00088	3.26586	4.31474	4.26933	59.027	17.5707	9.41561	10.9434	15.2258	7.76371	19.7196	17.2354	3487	1040	646	651	995	466	914	930
snf-9	WBGene00004908	Transporter	4.6616	1.13771	-1.01664	-1.14107	1.39985	-1.00755	-1.11425	3.79974	1.57891	1.76505	1.5551	1.38853	2.06419	1.56806	1.42284	3.79974	1.57891	1.76505	1.5551	1.38853	2.06419	1.56806	1.42284	14.609	1.76871	2.2587	1.84583	1.58315	2.69901	2.12304	1.48104	1453	177	261	185	175	273	166	135
F07G6.10	WBGene00045271	Uncharacterized protein	4.66111	1.46229	1.47893	1.36019	1.48799	1.61723	1.17313	5.62577	3.40509	3.95333	3.96965	3.8489	3.97846	4.09861	3.63545	5.62577	3.40509	3.95333	3.96965	3.8489	3.97846	4.09861	3.63545	35.9988	9.33884	14.3953	14.7015	13.6862	13.9009	16.7447	10.2585	537	140	249	221	226	211	196	140
pitr-5	WBGene00017312	Phosphate transporter	4.65136	-1.11598	1.00249	1.2266	1.23754	1.23925	1.15609	2.54681	0.329162	0.170855	0.332751	0.623831	0.63664	0.638633	0.53842	2.54681	0.329162	0.170855	0.332751	0.623831	0.63664	0.638633	0.53842	6.88641	0.232338	0.133462	0.257824	0.538136	0.487003	0.653322	0.405502	490	17	12	19	43	36	37	27
gly-6	WBGene00001631	GLYcosylation related	4.63816	1.16436	1.15749	1.11396	1.10174	1.19258	1.02323	5.06724	2.85369	3.07323	3.06469	3.00939	2.99348	3.10778	2.88682	5.06724	2.85369	3.07323	3.06469	3.00939	2.99348	3.10778	2.88682	27.4759	5.82465	7.14821	7.13658	7.12352	6.12308	8.08855	5.68373	2363	502	713	617	677	532	545	446
C25H3.10	WBGene00016119	Uncharacterized protein	4.63619	-1.20014	-1.23116	1.17092	-1.20639	1.17289	-1.32679	5.59509	3.38215	3.11895	3.08213	3.60979	3.11146	3.61223	2.97421	5.59509	3.38215	3.11895	3.08213	3.60979	3.11146	3.61223	2.97421	35.4842	9.16724	7.42697	7.21846	11.2549	6.83925	11.907	6.09493	1461	376	346	297	510	284	379	225
cdd-1	WBGene00000391	CytiDine Deaminase	4.63225	-1.40258	-1.01173	-1.33859	-1.12277	-1.40317	1.14356	4.4595	2.24779	1.7597	2.23097	1.82707	2.08072	1.75909	2.44132	4.4595	2.24779	1.7597	2.23097	1.82707	2.08072	1.75909	2.44132	20.6973	3.39695	2.24986	3.50723	2.51878	2.74406	2.54762	3.91409	459	76	58	79	62	62	45	80
pah-1	WBGene00000240	PhenylAlanine Hydroxylase	4.62632	1.3795	1.4696	-1.05153	-1.02536	-1.21667	-1.04726	6.19254	3.98267	4.44682	4.53809	3.91019	3.94654	3.69973	3.91606	6.19254	3.98267	4.44682	4.53809	3.91019	3.94654	3.69973	3.91606	49.9207	14.7118	20.9902	22.6193	14.2518	13.6162	12.5898	12.8602	3179	938	1548	1449	1001	881	630	747
ugt-9	WBGene00020587	UDP-GlucuronosylTransferase	4.60793	-1.06959	1.07882	1.3167	-1.07378	1.34713	1.34828	2.81264	0.608521	0.511459	0.71798	1.00545	0.505823	1.03842	1.03964	2.81264	0.608521	0.511459	0.71798	1.00545	0.505823	1.03842	1.03964	8.37046	0.468663	0.432757	0.621531	0.99611	0.370327	1.16586	0.927656	624	35	38	47	82	28	68	64
pmp-1	WBGene00004058	Peroxisomal Membrane Protein related	4.59821	1.27807	1.64756	-1.44518	1.64594	1.7036	-1.15566	5.4569	3.25583	3.60979	3.97616	2.72458	3.97474	4.02441	3.04711	5.4569	3.25583	3.60979	3.97616	2.72458	3.97474	4.02441	3.04711	32.8922	8.2769	11.0431	14.7815	5.57775	13.8564	15.9586	6.44642	3052	770	1189	1380	572	1306	1161	547
T05E7.1	WBGene00020258	Uncharacterized protein	4.58435	-1.38528	1.08981	-1.13726	-1.29949	1.13334	-1.37485	3.18168	0.984964	0.514787	1.10905	0.799402	0.607016	1.16555	0.525689	3.18168	0.984964	0.514787	1.10905	0.799402	0.607016	1.16555	0.525689	10.3461	0.887536	0.436337	1.09165	0.718716	0.459195	1.3769	0.39119	685	59	34	73	53	31	72	24
T24D3.2	WBGene00023492	Uncharacterized protein	4.58216	1.44264	2.06553	1.75817	1.21166	-1.0119	1.58309	4.43678	2.24075	2.76946	3.28726	3.05482	2.51774	2.22368	2.90349	4.43678	2.24075	2.76946	3.28726	3.05482	2.51774	2.22368	2.90349	20.386	3.382	5.52681	8.55893	7.36326	4.0557	3.97375	5.7548	202	34	64	86	81	41	31	52
K07E1.1	WBGene00019489	1,2-dihydroxy-3-keto-5-methylthiopentene dioxygenase homolog 2	4.58047	-1.55904	-1.67682	-1.39884	-1.88102	-1.22611	-1.32631	6.03227	3.83678	3.19612	3.09105	3.35255	2.92526	3.54269	3.42936	6.03227	3.83678	3.19612	3.09105	3.35255	2.92526	3.54269	3.42936	45.2959	13.1898	7.94366	7.25225	9.27474	5.76846	11.3326	8.65867	1004	293	205	162	228	130	197	176
Y39H10B.2	WBGene00044527	Non-coding transcript of protein-coding gene Y39H10B.2c	4.56774	1.3012	1.15307	1.02235	1.14915	1.14336	-1.13819	5.813	3.62152	4.00136	3.827	3.65341	3.82208	3.8148	3.43478	5.813	3.62152	4.00136	3.827	3.65341	3.82208	3.8148	3.43478	39.9654	11.2589	14.9006	13.0199	11.7291	12.2878	13.742	8.70584	1044	331	442	332	337	331	283	213
ZC328.3	WBGene00022593	Uncharacterized protein	4.55127	-1.28037	1.0643	-1.09057	-1.16452	1.16116	-1.06368	5.24451	3.05824	2.70168	3.14815	2.93316	2.83851	3.2738	2.96918	5.24451	3.05824	2.70168	3.14815	2.93316	2.83851	3.2738	2.96918	29.52	7.04285	5.28928	7.55434	6.65841	5.36094	9.22111	6.07001	2537	607	528	652	631	468	621	477
Y39D8A.1	WBGene00021448	Non-coding transcript of protein-coding gene Y39D8A.1b	4.53126	1.08617	1.25678	-1.18088	1.17421	-1.08389	-1.36735	3.06957	0.889661	1.00891	1.21939	0.649796	1.12135	0.773441	0.438277	3.06957	0.889661	1.00891	1.21939	0.649796	1.12135	0.773441	0.438277	9.75827	0.761959	0.969844	1.24098	0.559439	0.999642	0.811293	0.316648	673	57	83	83	42	73	42	22
lfi-1	WBGene00022500	Lin-5 (Five) Interacting protein	4.531	1.01177	1.01324	-1.1499	1.15697	-1.2744	1.08068	5.12825	2.94842	2.96529	2.96739	2.74691	3.15877	2.5986	3.06036	5.12825	2.94842	2.96529	2.96739	2.74691	3.15877	2.5986	3.06036	28.1672	6.42048	6.47443	6.6033	5.69062	7.10886	5.46378	6.51459	9295	2118	2477	2186	2051	2357	1370	1942
Y51H7C.13	WBGene00021791	Uncharacterized protein	4.51609	-1.37909	-1.50902	-1.11874	-1.19278	-1.55173	-1.45447	3.14426	0.969186	0.505465	0.375577	0.807306	0.714852	0.335311	0.428692	3.14426	0.969186	0.505465	0.375577	0.807306	0.714852	0.335311	0.428692	10.1553	0.867901	0.42637	0.288924	0.727102	0.565899	0.318495	0.311925	489	42	24	14	39	28	12	14
hsp-25	WBGene00002023	Heat Shock Protein	4.50847	-1.00907	-1.05946	-1.11353	-1.03612	1.23208	1.01076	7.44551	5.27288	5.25985	5.18954	5.11773	5.22169	5.57397	5.28831	7.44551	5.27288	5.25985	5.18954	5.11773	5.22169	5.57397	5.28831	145.134	38.4962	37.8618	37.0408	35.9471	36.8241	49.059	38.5346	3648	950	1113	952	962	938	973	919
nas-37	WBGene00003553	Zinc metalloproteinase nas-37	4.49823	1.04728	1.06294	-1.01758	-1.30466	1.37012	1.16208	4.12654	1.95718	2.02384	2.04525	1.93204	1.57351	2.41148	2.17389	4.12654	1.95718	2.02384	2.04525	1.93204	1.57351	2.41148	2.17389	17.5347	2.58597	2.89956	2.97921	2.78779	1.67628	4.70486	3.11895	1715	251	324	297	298	163	354	273
F22B5.4	WBGene00009042	Uncharacterized protein	4.49463	1.18587	1.18826	1.84976	1.24019	1.07757	1.15997	2.5168	0.348602	0.594548	0.597455	1.23594	0.659164	0.456382	0.562688	2.5168	0.348602	0.594548	0.597455	1.23594	0.659164	0.456382	0.562688	6.72116	0.248065	0.513513	0.493827	1.33869	0.511043	0.443963	0.424901	155	6	14	12	35	12	8	9
C42C1.9	WBGene00016587	Uncharacterized protein	4.48928	-1.20592	-1.4057	1.41765	1.48534	-1.14218	1.49445	4.48711	2.32063	2.05049	1.82934	2.82413	2.89142	2.12885	2.90025	4.48711	2.32063	2.05049	1.82934	2.82413	2.89142	2.12885	2.90025	21.0473	3.64825	2.97722	2.4479	6.1091	5.60639	3.67315	5.74262	480	52	51	33	94	76	45	66
pcp-4	WBGene00003959	Prolyl Carboxy Peptidase like	4.47587	-1.30081	-1.15188	-1.38475	-1.17681	-1.55185	-1.55412	3.06776	0.905594	0.526185	0.701598	0.435973	0.670717	0.271606	0.269494	3.06776	0.905594	0.526185	0.701598	0.435973	0.670717	0.271606	0.269494	9.75202	0.783641	0.447594	0.60228	0.36575	0.520633	0.253728	0.186063	1417	115	76	89	59	77	29	25
R09E10.1	WBGene00011171	Uncharacterized protein	4.47527	1.1663	-1.0977	1.03617	-1.0723	1.05796	1.23155	2.71652	0.554541	0.776477	0.420061	0.605801	0.453828	0.635826	0.855022	2.71652	0.554541	0.776477	0.420061	0.605801	0.453828	0.635826	0.855022	7.83616	0.412793	0.696969	0.333682	0.51792	0.327137	0.649992	0.710068	323	17	34	14	24	14	21	27
fah-1	WBGene00019620	FumarylAcetoacetate Hydrolase	4.47354	1.03427	-1.00937	-1.19012	-1.24458	1.03244	-1.22721	7.17115	5.00973	5.05834	4.99628	4.75862	4.69407	5.05579	4.71435	7.17115	5.00973	5.05834	4.99628	4.75862	4.69407	5.05579	4.71435	109.907	31.9029	32.4824	31.7858	27.2987	24.3249	34.1906	24.332	6415	1866	2200	1866	1762	1443	1565	1298
clec-119	WBGene00018575	C-type LECtin	4.46636	1.09805	-1.05633	-1.07442	-1.05633	-1.07144	-1.14544	2.39785	0.238753	0.373699	0.159695	0.13519	0.159695	0.139204	0.0428554	2.39785	0.238753	0.373699	0.159695	0.13519	0.159695	0.139204	0.0428554	6.1696	0.165403	0.305719	0.117549	0.1059	0.10485	0.130118	0.025937	521	14	30	10	10	9	9	2
K12B6.9	WBGene00023432	Uncharacterized protein	4.46536	1.06061	1.12438	-1.64173	-1.13806	1.3642	-1.22968	4.2895	2.13072	2.21562	2.29985	1.4155	1.94415	2.57877	1.83244	4.2895	2.13072	2.21562	2.29985	1.4155	1.94415	2.57877	1.83244	19.0429	3.02256	3.44224	3.71035	1.63398	2.43304	5.36003	2.25555	414	66	87	82	40	54	92	45
C48E7.1	WBGene00016749	Uncharacterized protein	4.46327	1.11216	1.0742	1.13053	-1.08337	-1.03067	1.05252	6.76335	4.60525	4.75862	4.70851	4.78226	4.48972	4.56166	4.6791	6.76335	4.60525	4.75862	4.70851	4.78226	4.48972	4.56166	4.6791	75.917	23.2755	26.3185	25.9608	27.7444	20.9297	23.7389	23.5675	1851	569	745	637	748	519	454	525
T28H10.2	WBGene00012143	Uncharacterized protein	4.46183	-1.15562	-1.27599	-1.32561	-1.19025	1.13125	-1.73752	3.49876	1.34112	1.13246	0.989506	0.934469	1.08986	1.51904	0.544094	3.49876	1.34112	1.13246	0.989506	0.934469	1.08986	1.51904	0.544094	12.385	1.38436	1.1314	0.936906	0.889024	0.960424	2.008	0.411486	396	45	42	31	32	32	51	12
glc-2	WBGene00001592	Glutamate-gated chloride channel subunit beta	4.45701	1.07489	1.13406	1.24896	1.03573	1.05105	-1.22289	3.37863	1.22255	1.32674	1.40405	1.54328	1.2732	1.29438	0.93225	3.37863	1.22255	1.32674	1.40405	1.54328	1.2732	1.29438	0.93225	11.5861	1.21164	1.42297	1.55342	1.88374	1.21052	1.61876	0.808529	703	74	101	95	127	75	77	45
unc-49	WBGene00006784	Uncharacterized protein	4.4552	1.43444	1.25736	-1.12999	1.19541	1.42591	1.24567	4.26704	2.11155	2.63204	2.44195	1.93525	2.36906	2.62343	2.42847	4.26704	2.11155	2.63204	2.44195	1.93525	2.36906	2.62343	2.42847	18.7524	2.9612	4.98582	4.21199	2.7967	3.54653	5.56668	3.87114	905	134	247	199	159	164	176	186
F17A9.5	WBGene00017537	Uncharacterized protein	4.43823	1.36451	1.21393	1.34377	1.13386	1.66416	1.17518	4.43577	2.28578	2.73417	2.56546	2.71207	2.46703	3.02057	2.51866	4.43577	2.28578	2.73417	2.56546	2.71207	2.46703	3.02057	2.51866	20.384	3.52614	5.40475	4.70685	5.50454	3.89517	7.54029	4.21476	1284	223	395	299	384	250	373	243
T12B3.2	WBGene00020445	Uncharacterized protein	4.43486	1.64799	1.49455	1.76366	1.46052	1.32488	1.4225	3.33832	1.18943	1.91014	1.76914	2.008	1.73592	1.5953	1.69786	3.33832	1.18943	1.91014	1.76914	2.008	1.73592	1.5953	1.69786	11.2989	1.15602	2.60422	2.31202	3.03558	1.99879	2.17472	2.01223	754	78	202	156	224	136	114	123
atic-1	WBGene00016957	5-Aminoimidazole-4-carboxamide ribonucleotide formylTransferase/IMP Cyclohydrolase homolog	4.43431	-1.31539	-1.07213	1.08051	-1.56877	1.0504	1.35732	6.19506	4.04635	3.65087	3.94587	4.15807	3.39672	4.11729	4.48711	6.19506	4.04635	3.65087	3.94587	4.15807	3.39672	4.11729	4.48711	50.0017	15.5544	11.3374	14.3962	17.0907	8.66273	17.0108	20.2012	4072	1257	1072	1169	1530	698	1075	1487
nid-1	WBGene00003738	NIDogen (basement membrane protein)	4.43215	1.00658	1.12561	-1.81867	-1.21234	-1.25171	-1.12741	6.25124	4.10324	4.11269	4.27395	3.24035	3.82545	3.77934	3.93022	6.25124	4.10324	4.11269	4.27395	3.24035	3.82545	3.77934	3.93022	52.0672	16.2663	16.1412	18.4526	8.47569	12.3081	13.3256	13.0415	9533	3171	3402	3403	1724	2353	1936	2212
T28B4.1	WBGene00020884	Uncharacterized protein	4.4249	1.09463	-1.11511	-1.11197	1.02931	-1.14657	-1.05294	3.48408	1.33843	1.46888	1.18125	1.18531	1.3801	1.14111	1.26401	3.48408	1.33843	1.46888	1.18125	1.18531	1.3801	1.14111	1.26401	12.2759	1.37982	1.67012	1.18839	1.25921	1.36422	1.33799	1.22826	911	104	144	90	103	104	80	85
F40F8.4	WBGene00009577	Uncharacterized protein	4.42388	1.27993	1.12823	1.55998	1.07921	-1.01162	1.32906	3.84685	1.70154	2.05761	1.87561	2.34307	1.81152	1.68488	2.11195	3.84685	1.70154	2.05761	1.87561	2.34307	1.81152	1.68488	2.11195	14.9682	2.00217	2.98855	2.5614	4.08527	2.16214	2.36134	2.94058	409	55	95	71	124	60	51	74
acox-1.1	WBGene00008564	Acyl-coenzyme A oxidase	4.4236	1.05025	1.13454	2.12584	1.21693	1.38249	1.30797	5.53289	3.38766	3.45839	3.56978	4.4757	3.6709	3.85494	3.77499	5.53289	3.38766	3.45839	3.56978	4.4757	3.6709	3.85494	3.77499	34.3526	9.2289	9.76677	10.6695	21.8614	10.8472	14.1105	11.5264	2750	747	913	858	1940	884	887	846
cpb-2	WBGene00000771	Cytoplasmic polyadenylation element-binding protein 2	4.42048	-1.02524	-1.09485	1.03526	-1.00357	1.09269	1.08243	2.72551	0.581301	0.54534	0.450569	0.631291	0.576159	0.709181	0.69558	2.72551	0.581301	0.54534	0.450569	0.631291	0.576159	0.709181	0.69558	7.88504	0.43904	0.465443	0.362504	0.544839	0.432974	0.737671	0.535843	628	35	43	30	48	35	47	39
best-14	WBGene00009340	Bestrophin homolog 14	4.4117	-1.15807	-1.12796	-1.24837	-1.13834	-1.51292	-1.34742	5.5074	3.36607	3.15434	3.19235	3.04602	3.17914	2.76873	2.93587	5.5074	3.36607	3.15434	3.19235	3.04602	3.17914	2.76873	2.93587	33.8807	9.01094	7.63158	7.86359	7.32464	7.26018	6.20646	5.88305	1917	511	501	448	458	418	276	304
asp-2	WBGene00000215	ASpartyl Protease	4.40267	1.93446	2.39308	-1.10061	1.41022	3.0705	1.06801	8.71401	6.57563	7.52756	7.83451	6.43733	7.07155	8.19411	6.67056	8.71401	6.57563	7.52756	7.83451	6.43733	7.07155	8.19411	6.67056	500.914	97.0466	189.235	230.673	94.0752	139.411	278.566	106.081	30256	5879	13196	13983	6254	8546	13172	5866
C55A6.4	WBGene00008333	Uncharacterized protein	4.39923	-1.55058	-1.94483	-2.04363	-1.72763	-1.7223	-1.75386	3.9399	1.80265	1.16984	0.843006	0.771517	1.01386	1.01831	0.992118	3.9399	1.80265	1.16984	0.843006	0.771517	1.01386	1.01831	0.992118	15.7883	2.20188	1.19699	0.760749	0.686849	0.87011	1.13669	0.874843	553	78	49	27	27	31	32	28
nlt-1	WBGene00003773	Non-specific lipid-transfer protein-like 1	4.39717	-1.22765	-1.02983	-1.21807	-1.11284	1.83924	-1.32916	7.46881	5.33223	5.03633	5.28982	5.04764	5.17799	6.21134	4.92172	7.46881	5.33223	5.03633	5.28982	5.04764	5.17799	6.21134	4.92172	149.585	39.8971	31.9073	39.7796	34.2503	35.5512	77.1706	28.6544	2480	663	614	664	628	599	1003	434
F17C11.6	WBGene00008917	Uncharacterized protein	4.39695	1.39578	2.052	1.48914	1.17897	1.85358	1.71488	5.44122	3.30472	3.78579	4.34175	3.8792	3.54225	4.19503	4.08282	5.44122	3.30472	3.78579	4.34175	3.8792	3.54225	4.19503	4.08282	32.6602	8.58225	12.7056	19.4921	13.9944	9.77643	18.0642	14.7215	565	149	255	339	268	172	245	233
F35B12.9	WBGene00009388	Uncharacterized protein	4.39296	1.44703	1.46615	1.94681	1.29226	1.34824	1.91074	3.6709	1.53571	2.06881	2.08774	2.49682	1.90561	1.96678	2.46984	3.6709	1.53571	2.06881	2.08774	2.49682	1.90561	1.96678	2.46984	13.6324	1.6847	3.02198	3.08105	4.64621	2.34496	3.14437	4.05469	629	78	162	143	237	110	114	171
clp-6	WBGene00000546	CaLPain family	4.38576	1.03848	-1.0661	1.00444	1.02154	-1.08936	1.09741	3.19822	1.06539	1.11987	0.973051	1.07178	1.09614	0.941911	1.1995	3.19822	1.06539	1.11987	0.973051	1.07178	1.09614	0.941911	1.1995	10.4455	0.985838	1.11475	0.914654	1.09885	0.970204	1.02838	1.13701	914	87	114	81	107	87	71	91
amt-1	WBGene00000133	Putative ammonium transporter 1	4.38386	4.47033	3.52815	3.7194	2.06794	4.04631	3.93309	3.58226	1.45006	3.61044	3.26897	3.34513	2.49825	3.46666	3.42572	3.58226	1.45006	3.61044	3.26897	3.34513	2.49825	3.46666	3.42572	13.0085	1.55054	11.0451	8.3947	9.21627	4.00398	10.7314	8.64586	970	116	955	630	760	304	627	589
lim-9	WBGene00006407	LIM domain family	4.36607	1.21573	1.24082	-1.04828	1.12807	1.13173	1.05916	5.78143	3.65509	3.93691	3.96638	3.58707	3.82894	3.83362	3.73801	5.78143	3.65509	3.93691	3.96638	3.58707	3.82894	3.83362	3.73801	39.3467	11.5535	14.2513	14.662	11.0782	12.3626	13.8897	11.2232	2206	818	1100	1071	905	850	705	744
papl-1	WBGene00008936	Purple acid phosphatase	4.36465	1.37154	1.33099	-1.6177	1.165	-1.2399	-1.16211	6.21753	4.09166	4.54745	4.50416	3.39771	4.31199	3.78144	3.87491	6.21753	4.09166	4.54745	4.50416	3.39771	4.31199	3.78144	3.87491	50.9876	16.1677	22.6582	22.1263	9.60843	18.1654	13.3601	12.4363	3239	1030	1671	1414	675	1173	666	722
ifa-1	WBGene00002050	Intermediate filament protein ifa-1	4.3643	1.41422	1.31068	1.0039	1.25832	1.02726	-1.1435	5.60647	3.48072	3.98073	3.87103	3.48633	3.81221	3.51952	3.28726	5.60647	3.48072	3.98073	3.87103	3.48633	3.81221	3.51952	3.28726	35.6877	10.0992	14.6877	13.4731	10.2551	12.1934	11.0963	7.82585	2866	803	1350	1075	905	992	690	576
C51E3.10	WBGene00008255	Uncharacterized protein	4.36307	1.17182	1.10004	1.16518	1.1948	1.51156	1.0394	5.27288	3.14753	3.37629	3.28509	3.36809	3.4043	3.74357	3.20329	5.27288	3.14753	3.37629	3.28509	3.36809	3.4043	3.74357	3.20329	29.8912	7.54411	9.23724	8.53959	9.37375	8.73752	12.9762	7.34519	152	38	53	43	54	41	54	32
btb-14	WBGene00013275	BTB/POZ domain-containing protein Y57A10B.3	4.36234	-1.20212	1.18927	-1.15293	-1.1998	-1.13597	-1.10465	4.58986	2.46476	2.19918	2.71483	2.25945	2.20196	2.28084	2.32116	4.58986	2.46476	2.19918	2.71483	2.25945	2.20196	2.28084	2.32116	21.9709	4.15351	3.39297	5.29907	3.80307	3.06927	4.17897	3.53762	971	184	174	236	186	138	145	143
K12H4.7	WBGene00019682	Putative serine protease K12H4.7	4.36055	-1.48153	-1.42717	-4.3988	-1.5584	-1.0957	-4.11048	8.42369	6.29918	5.7321	5.78602	4.16207	5.65912	6.16734	4.25988	8.42369	6.29918	5.7321	5.78602	4.16207	5.65912	6.16734	4.25988	385.952	80.3724	53.6556	56.5157	17.1477	51.6777	75.21	17.045	27320	5699	4414	4030	1339	3710	4180	1104
F15G9.1	WBGene00008865	Uncharacterized protein	4.35235	-1.13751	-1.13448	-1.04094	1.01787	1.08969	-1.01148	7.19753	5.07573	4.88985	4.89371	5.01784	5.10129	5.19965	5.05927	7.19753	5.07573	4.88985	4.89371	5.01784	5.10129	5.19965	5.05927	112.767	33.5184	29.095	29.5529	33.3546	33.499	37.8537	31.8645	3539	1019	1035	916	1137	1041	914	892
ZK287.9	WBGene00013968	Uncharacterized protein	4.34063	-1.10185	1.06679	1.01497	1.00821	1.51336	-1.06658	5.06785	2.94994	2.81002	3.04322	2.97138	2.96173	3.5477	2.85696	5.06785	2.94994	2.81002	3.04322	2.97138	2.96173	3.5477	2.85696	27.4857	6.42943	5.69714	7.0214	6.862	5.9759	11.3679	5.57543	452	106	109	117	125	100	147	84
wht-6	WBGene00007060	WHiTe (Drosophila) related ABC transporter	4.3378	1.20909	1.3972	1.24246	1.27224	1.13678	1.33393	3.00272	0.885755	1.15967	1.36829	1.19896	1.23312	1.0707	1.30144	3.00272	0.885755	1.15967	1.36829	1.19896	1.23312	1.0707	1.30144	9.4312	0.757318	1.17816	1.49061	1.28037	1.15279	1.21462	1.27668	807	65	117	129	122	101	82	100
F23C8.7	WBGene00017736	Tyrosine-protein kinase	4.32983	1.08304	1.08191	1.00372	1.23568	-1.04097	1.05943	2.66231	0.548002	0.663088	0.661584	0.553352	0.853308	0.490072	0.631291	2.66231	0.548002	0.663088	0.661584	0.553352	0.853308	0.490072	0.631291	7.52191	0.407523	0.580536	0.559774	0.463051	0.705102	0.47943	0.483812	438	24	40	33	30	42	22	26
glna-2	WBGene00008435	GLutamiNAse	4.32879	1.11644	1.14854	1.17883	-1.02853	1.6489	1.34872	4.89308	2.77911	2.93802	2.97891	3.01647	2.73852	3.50062	3.2107	4.89308	2.77911	2.93802	2.97891	3.01647	2.73852	3.50062	3.2107	25.3438	5.45625	6.33331	6.68306	7.16734	4.95921	10.9566	7.39342	1337	345	464	370	485	323	514	315
W04E12.7	WBGene00012252	Uncharacterized protein	4.32509	1.64136	1.10352	1.55669	1.06649	1.28459	1.01335	3.63125	1.51852	2.23342	1.66063	2.157	1.6114	1.87983	1.53765	3.63125	1.51852	2.23342	1.66063	2.157	1.6114	1.87983	1.53765	13.3553	1.65955	3.4983	2.06874	3.49318	1.74471	2.91009	1.70262	415	52	127	65	120	56	71	49
faah-1	WBGene00015047	Fatty acid amide hydrolase 1	4.29118	1.20802	1.3443	1.20373	1.21261	1.21325	1.22406	5.65144	3.55007	3.82271	3.97693	3.81758	3.82818	3.82894	3.84175	5.65144	3.55007	3.82271	3.97693	3.81758	3.82818	3.82894	3.84175	36.5841	10.7172	13.0459	14.7851	13.3776	12.3573	13.8361	12.1504	2917	854	1209	1187	1181	1002	866	886
T01H3.5	WBGene00011351	Uncharacterized protein	4.2872	1.38331	1.14411	1.00529	-1.02723	1.15373	-1.21097	2.71727	0.617237	1.08537	0.811466	0.624846	0.578475	0.823538	0.341072	2.71727	0.617237	1.08537	0.811466	0.624846	0.578475	0.823538	0.341072	7.84386	0.477757	1.0655	0.728829	0.538837	0.435627	0.867831	0.236717	182	12	29	17	14	11	16	5
Y19D2B.1	WBGene00012489	Uncharacterized protein	4.28691	1.31649	1.23964	-1.03638	-1.32811	-1.15685	-1.52149	3.48885	1.38891	1.78561	1.69884	1.33736	0.979536	1.17871	0.783429	3.48885	1.38891	1.78561	1.69884	1.33736	0.979536	1.17871	0.783429	12.3142	1.4571	2.2953	2.14226	1.49544	0.830771	1.39575	0.635163	148	18	32	26	20	11	14	7
F26F12.5	WBGene00017836	Uncharacterized protein	4.27094	1.52602	1.86958	2.06569	1.80789	1.77464	1.28522	2.23622	0.141663	0.751439	1.04438	1.18829	0.99597	0.969186	0.503674	2.23622	0.141663	0.751439	1.04438	1.18829	0.99597	0.969186	0.503674	5.42255	0.093839	0.66604	1.00148	1.26403	0.848219	1.06721	0.372386	106	2	16	20	28	17	17	7
F55H12.2	WBGene00010133	Uncharacterized protein	4.25627	1.40674	1.25828	1.65273	-1.30658	1.3015	1.49752	7.26758	5.17799	5.67034	5.50944	5.90284	4.79219	5.55817	5.76056	7.26758	5.17799	5.67034	5.50944	5.90284	4.79219	5.55817	5.76056	120.736	36.003	51.1184	46.365	64.0147	26.2437	48.627	54.7166	976	292	480	377	572	216	309	404
pgrn-1	WBGene00011936	ProGRaNulin homolog	4.24836	1.25928	1.25368	-1.15227	-1.11955	1.24262	1.01679	5.96063	3.87372	4.20632	4.1999	3.66925	3.7108	4.18711	3.89774	5.96063	3.87372	4.20632	4.1999	3.66925	3.7108	4.18711	3.89774	43.3582	13.62	17.4622	17.4417	11.8415	11.2164	17.9542	12.7349	2167	683	1014	878	655	571	705	582
kin-1	WBGene00002189	cAMP-dependent protein kinase catalytic subunit	4.24379	1.06404	1.14106	-1.06081	-1.09591	-1.07288	1.10396	6.13109	4.04573	4.13529	4.23611	3.96057	3.9136	3.94425	4.18843	6.13109	4.04573	4.13529	4.23611	3.96057	3.9136	3.94425	4.18843	47.9821	15.5475	16.4717	17.939	14.8264	13.2686	15.134	16.1255	2557	840	1029	977	887	726	651	801
ost-1	WBGene00003893	OSTeonectin (SPARC) related	4.24074	-1.13181	-1.23274	-1.16625	-1.34605	-1.3601	-1.22641	8.49823	6.41391	6.23528	6.11204	6.19204	5.98518	5.9702	6.11947	8.49823	6.41391	6.23528	6.11204	6.19204	5.98518	5.9702	6.11947	410.626	86.5729	76.9115	72.0637	79.3296	65.7162	64.8819	71.5651	15159	3203	3295	2677	3238	2465	1879	2414
hrg-6	WBGene00009495	Heme Responsive Gene	4.23573	2.32585	2.20511	1.68137	1.73476	1.9204	1.92124	3.13563	1.05302	2.27077	2.19387	1.80265	1.84775	1.99443	1.99505	3.13563	1.05302	2.27077	2.19387	1.80265	1.84775	1.99443	1.99505	10.1147	0.971695	3.61942	3.41298	2.45672	2.23963	3.22602	2.65289	135	12	50	44	32	34	25	25
C24B9.3	WBGene00016048	Uncharacterized protein	4.2356	-1.04793	-1.13635	-3.25957	-1.40447	-2.15775	-1.00689	6.4944	4.41183	4.34429	4.22743	2.70715	3.92181	3.30231	4.40193	6.4944	4.41183	4.34429	4.22743	2.70715	3.92181	3.30231	4.40193	61.3407	20.1885	19.4481	17.7564	5.49291	13.3434	9.40574	19.0239	3675	1212	1352	1070	364	812	442	1041
F18E3.12	WBGene00045275	Uncharacterized protein	4.23319	1.39074	1.2568	1.90957	1.06747	-1.12515	1.37371	6.18877	4.10702	4.58287	4.43678	5.04027	4.20122	3.93691	4.5651	6.18877	4.10702	4.58287	4.43678	5.04027	4.20122	3.93691	4.5651	49.824	16.3337	23.2243	21.1434	34.0704	16.67	15.0366	21.6058	625	206	338	267	473	213	148	248
T16G1.6	WBGene00011800	Uncharacterized protein	4.23311	-1.23808	-1.1993	1.07673	1.0145	-1.26706	1.10839	3.12441	1.04269	0.734588	0.7805	1.14934	1.06346	0.701207	1.19115	3.12441	1.04269	0.734588	0.7805	1.14934	1.06346	0.701207	1.19115	10.0448	0.958965	0.647749	0.690496	1.20466	0.927213	0.729098	1.12593	605	58	46	42	81	57	35	62
asg-2	WBGene00000210	Probable ATP synthase subunit g 2, mitochondrial	4.23266	1.00316	-1.17051	-1.11527	-1.19262	-1.02287	-1.5165	8.24434	6.16278	6.16734	5.93564	6.00539	5.90864	6.13016	5.56203	8.24434	6.16278	6.16734	5.93564	6.00539	5.90864	6.13016	5.56203	314.086	72.7794	72.7579	63.4317	69.6335	62.0371	72.9187	47.4264	5776	1341	1553	1174	1416	1159	1052	797
spe-41	WBGene00004976	Uncharacterized protein	4.23064	1.77829	2.20602	2.11308	1.99391	2.43848	2.22025	3.18643	1.10556	1.93605	2.24701	2.1849	2.10116	2.39154	2.25628	3.18643	1.10556	1.93605	2.24701	2.1849	2.10116	2.39154	2.25628	10.3599	1.03683	2.66381	3.56931	3.59372	2.80499	4.6197	3.35692	1082	105	320	375	415	299	401	321
Y97E10C.1	WBGene00022410	Uncharacterized protein	4.22174	1.37076	1.37309	1.50661	1.3024	2.04247	1.20014	4.79636	2.71852	3.17349	3.17595	3.30983	3.0997	3.74883	2.98172	4.79636	2.71852	3.17349	3.17595	3.30983	3.0997	3.74883	2.98172	24.1063	5.21388	7.79599	7.73574	8.96467	6.78775	13.0292	6.14576	189	41	71	61	78	54	80	44
C30G12.2	WBGene00016274	Uncharacterized protein	4.20362	-1.98945	-4.45758	-2.6793	-2.44748	-4.9243	-3.88616	9.21191	7.14028	6.14791	4.98402	5.71843	5.84898	4.84036	5.18194	9.21191	7.14028	6.14791	4.98402	5.71843	5.84898	4.84036	5.18194	753.816	143.216	71.5174	31.6212	56.282	59.213	29.1624	35.0052	27931	5318	3075	1179	2306	2229	848	1185
T12B5.14	WBGene00050913	Uncharacterized protein	4.20062	1.54264	1.30346	-1.2238	1.27382	-1.01157	1.28832	3.81859	1.74798	2.37338	2.13032	1.45662	2.09715	1.73138	2.11347	3.81859	1.74798	2.37338	2.13032	1.45662	2.09715	1.73138	2.11347	14.7565	2.07891	3.96899	3.1903	1.71999	2.79529	2.47316	2.94354	229	33	72	50	30	44	30	42
Y57G11C.23	WBGene00013318	Uncharacterized protein	4.19984	-1.01062	-1.03647	-1.03386	-1.05002	1.05581	-1.0381	2.2671	0.196766	0.181518	0.145081	0.148728	0.126346	0.275115	0.142821	2.2671	0.196766	0.181518	0.145081	0.148728	0.126346	0.275115	0.142821	5.54465	0.135182	0.139638	0.107737	0.115748	0.079879	0.256385	0.088823	410	10	12	8	10	6	15	6
K02F6.3	WBGene00019337	Uncharacterized protein	4.19006	-1.03447	-1.0587	1.01506	-1.04014	-1.08484	-1.09586	2.24876	0.181788	0.132903	0.0994906	0.203354	0.12501	0.0643038	0.0497257	2.24876	0.181788	0.132903	0.0994906	0.203354	0.12501	0.0643038	0.0497257	5.46612	0.125317	0.108818	0.074171	0.156828	0.079094	0.058556	0.031349	953	22	23	13	31	14	8	5
C33G8.4	WBGene00016362	Uncharacterized protein	4.18901	1.17911	1.17564	1.77612	1.45903	1.17398	1.6011	4.21544	2.14882	2.38653	2.38227	2.97755	2.69383	2.38024	2.82789	4.21544	2.14882	2.38653	2.38227	2.97755	2.69383	2.38024	2.82789	18.1991	3.06835	4.0073	4.00565	6.9121	4.76796	4.57507	5.46028	279	48	72	62	118	75	55	77
F59F4.2	WBGene00010337	Uncharacterized protein	4.18197	1.05247	-1.19862	-1.19808	-1.17172	-1.06684	-1.13222	8.77281	6.70863	6.78241	6.44726	6.44791	6.48	6.61529	6.52947	8.77281	6.70863	6.78241	6.44726	6.44791	6.48	6.61529	6.52947	517.071	106.516	112.668	91.2552	94.8007	93.3215	102.644	96.3714	4754	982	1202	844	964	872	740	810
gst-10	WBGene00001758	Glutathione S-Transferase	4.18119	1.34847	1.48143	1.06842	-1.26895	-1.64369	1.97698	8.21933	6.15542	6.58674	6.72241	6.2509	5.81178	5.43848	7.13871	8.21933	6.15542	6.58674	6.72241	6.2509	5.81178	5.43848	7.13871	307.831	72.5377	98.1392	110.225	82.6491	57.4899	44.4527	145.143	6061	1461	2307	2214	1836	1159	691	2671
C02F5.14	WBGene00044445	Uncharacterized protein	4.17884	-1.0244	1.01475	1.10053	1.00483	-1.61914	-1.03584	4.05977	1.99667	1.96189	2.0178	2.13488	2.00363	1.30144	1.94586	4.05977	1.99667	1.96189	2.0178	2.13488	2.00363	1.30144	1.94586	16.9539	2.67131	2.73708	2.90398	3.42478	2.55027	1.63273	2.51736	256	41	48	44	57	39	20	35
ketn-1	WBGene00004130	KETtiN (Drosophila actin-binding) homolog	4.16359	-1.32174	-1.26833	-1.57013	-1.53327	-1.54733	-1.27531	4.54462	2.48679	2.08435	2.14386	1.8359	1.87018	1.85701	2.13593	4.54462	2.48679	2.08435	2.14386	1.8359	1.87018	1.85701	2.13593	21.525	4.22366	3.06448	3.23543	2.53489	2.27964	2.83657	3.01209	14390	2177	1918	1670	1451	1133	1183	1425
inx-17	WBGene00002139	Innexin-17	4.1591	1.36442	1.38132	1.17011	1.4517	1.41327	1.07037	4.70668	2.65041	3.09869	3.11646	2.87705	3.18815	3.14944	2.74851	4.70668	2.65041	3.09869	3.11646	2.87705	3.18815	3.14944	2.74851	23.0389	4.91719	7.29723	7.35144	6.34298	7.32818	8.41723	5.09384	1152	243	422	367	354	369	328	235
ppat-1	WBGene00011407	Amidophosphoribosyltransferase	4.15572	1.03257	-1.00084	-1.12337	-1.17951	-1.23879	-1.12683	4.4787	2.4236	2.46984	2.42239	2.25576	2.18541	2.11467	2.25133	4.4787	2.4236	2.46984	2.42239	2.25576	2.18541	2.11467	2.25133	20.9533	4.01525	4.30461	4.13774	3.7934	3.017	3.60645	3.34171	1404	270	335	279	281	206	190	205
rpl-11.2	WBGene00004423	60S ribosomal protein L11-2	4.14322	1.48224	1.24415	1.16632	1.25551	1.52066	1.01704	10.0164	7.96565	8.53343	8.28081	8.18761	8.29392	8.57034	7.99002	10.0164	7.96565	8.53343	8.28081	8.18761	8.29392	8.57034	7.99002	1428.98	252.161	375.849	300.983	293.596	307.413	353.071	254.517	39213	6934	11966	8308	8906	8569	7597	6380
ZK1320.13	WBGene00044007	Uncharacterized protein	4.13766	1.22205	1.26943	1.17065	-1.13052	1.10149	1.26666	4.84095	2.79214	3.08145	3.13632	3.01945	2.61515	2.93159	3.13317	4.84095	2.79214	3.08145	3.13632	3.01945	2.61515	2.93159	3.13317	24.5927	5.54492	7.21197	7.47608	7.17502	4.45062	7.09322	6.99124	237	54	81	73	77	44	54	62
sir-2.2	WBGene00004801	NAD-dependent protein deacylase sir-2.2	4.13645	1.09423	1.04245	1.18974	-1.0207	1.26032	-1.01116	5.56203	3.51364	3.64355	3.57362	3.76429	3.48408	3.84742	3.49763	5.56203	3.51364	3.64355	3.57362	3.76429	3.48408	3.84742	3.49763	34.8207	10.4331	11.2854	10.7192	12.8486	9.30386	14.0458	9.1399	1407	422	530	438	574	382	445	338
drd-5	WBGene00018885	dietary restriction down regulated	4.13051	1.17242	1.22127	-1.18138	-1.3915	1.33307	-1.05041	5.76462	3.7183	3.94779	4.00669	3.47783	3.24166	4.13306	3.64735	5.76462	3.7183	3.94779	4.00669	3.47783	3.24166	4.13306	3.64735	39.0684	12.1625	14.3418	15.169	10.1966	7.65213	17.1526	10.3699	1807	564	770	706	522	360	622	439
C45E5.1	WBGene00016664	Uncharacterized protein	4.12063	-1.40553	-1.37835	-1.53076	-1.31808	-1.63505	-1.8412	4.28516	2.24229	1.75118	1.77935	1.62804	1.84386	1.53296	1.36164	4.28516	2.24229	1.75118	1.77935	1.62804	1.84386	1.53296	1.36164	19.0156	3.38491	2.24101	2.33696	2.04906	2.22936	2.03629	1.37963	806	144	111	100	96	96	68	54
F46H5.3	WBGene00018519	Probable arginine kinase F46H5.3	4.1204	-1.05237	-1.12502	-1.30241	-1.25324	-1.0947	-1.35786	9.86053	7.81774	7.7441	7.64779	7.43656	7.49208	7.68721	7.37641	9.86053	7.81774	7.7441	7.64779	7.43656	7.49208	7.68721	7.37641	1193.07	225.599	217.705	204.391	183.28	182.662	202.499	169.892	60499	11458	12833	10413	10268	9415	8060	7894
col-71	WBGene00000647	COLlagen	4.11955	1.05081	-1.0376	-1.32411	1.07797	1.00624	-1.1909	3.00939	0.966907	1.03842	0.913657	0.56188	1.07523	0.975885	0.714852	3.00939	0.966907	1.03842	0.913657	0.56188	1.07523	0.975885	0.714852	9.45748	0.863259	1.00248	0.839861	0.474329	0.942053	1.07696	0.558545	491	45	61	44	28	50	44	27
mec-7	WBGene00003171	Tubulin beta-1 chain	4.09005	1.24376	-1.03744	-1.05	1.00831	1.29523	-1.05846	3.59301	1.5609	1.87561	1.50787	1.49051	1.57284	1.9341	1.47894	3.59301	1.5609	1.87561	1.50787	1.49051	1.57284	1.9341	1.47894	13.0855	1.73042	2.50577	1.74498	1.78975	1.67548	3.06134	1.57877	806	107	179	109	122	105	148	89
unc-95	WBGene00006824	Uncharacterized protein	4.08995	-1.10928	-1.10597	-1.16926	-1.17115	-1.46095	-1.2498	4.05414	2.02206	1.87244	1.87674	1.79646	1.79413	1.47515	1.70036	4.05414	2.02206	1.87244	1.87674	1.79646	1.79413	1.47515	1.70036	16.8976	2.72916	2.48813	2.56241	2.4452	2.12403	1.91937	2.0158	827	134	142	127	133	106	74	91
Y54G2A.11	WBGene00021876	Uncharacterized protein	4.08613	1.28163	1.15092	1.48492	1.22591	1.99607	1.36712	5.82464	3.79391	4.15188	3.99669	4.36429	4.08776	4.79107	4.24505	5.82464	3.79391	4.15188	3.99669	4.36429	4.08776	4.79107	4.24505	40.2199	12.8276	16.6487	15.0141	20.0421	15.209	28.1613	16.843	2622	828	1203	977	1316	963	1350	1025
F42G4.2	WBGene00009641	Uncharacterized protein	4.08488	1.0358	1.08638	-1.1509	-1.03108	1.01153	1.25298	2.70715	0.676858	0.727602	0.79638	0.474091	0.632705	0.693402	1.00222	2.70715	0.676858	0.727602	0.79638	0.474091	0.632705	0.693402	1.00222	7.79104	0.536843	0.641118	0.709814	0.397673	0.482514	0.718328	0.887781	467	33	45	43	27	30	34	49
ncx-1	WBGene00003566	Na/Ca eXchangers	4.0779	1.24803	-1.04869	-1.0847	-1.04381	1.06024	-1.18231	4.80947	2.78165	3.1013	2.71305	2.66435	2.71979	2.86604	2.54004	4.80947	2.78165	3.1013	2.71305	2.66435	2.71979	2.86604	2.54004	24.2544	5.46808	7.31253	5.28566	5.28005	4.87006	6.77579	4.29653	2965	673	1042	653	717	608	649	482
acl-13	WBGene00008581	ACyLtransferase-like	4.07134	-1.1746	-1.15233	-1.23627	-1.12431	-1.29963	-1.10682	2.6728	0.647296	0.415127	0.442743	0.341305	0.478256	0.269196	0.500879	2.6728	0.647296	0.415127	0.442743	0.341305	0.478256	0.269196	0.500879	7.5748	0.506454	0.335931	0.356186	0.276458	0.345945	0.251559	0.370487	379	25	18	16	15	15	10	15
efn-3	WBGene00001164	Eph(F)riN	4.07071	-1.08206	1.12545	1.02514	-1.41036	-1.32005	-1.234	3.38215	1.35687	1.2431	1.52737	1.3927	0.860808	0.956275	1.05353	3.38215	1.35687	1.2431	1.52737	1.3927	0.860808	0.956275	1.05353	11.6068	1.40904	1.30622	1.79406	1.5891	0.713676	1.04859	0.943287	343	42	45	54	52	22	25	26
fbl-1	WBGene00001403	FiBuLin	4.06853	1.12484	1.28748	-1.01533	1.45039	1.05543	1.03953	3.75259	1.72808	1.8978	2.09263	1.70613	2.26453	1.80591	1.78401	3.75259	1.72808	1.8978	2.09263	1.70613	2.26453	1.80591	1.78401	14.207	2.05203	2.56623	3.08495	2.21348	3.24739	2.69571	2.17128	1377	199	298	302	236	333	214	193
C10G8.8	WBGene00015684	Uncharacterized protein	4.06584	-1.02993	1.06477	-1.21043	-1.14766	1.03803	-1.1238	7.38324	5.35969	5.31714	5.45023	5.08417	5.16099	5.41353	5.1913	7.38324	5.35969	5.31714	5.45023	5.08417	5.16099	5.41353	5.1913	134.466	40.7544	39.3875	44.5087	34.9715	34.9761	43.8544	35.3777	5793	1776	1982	1938	1673	1532	1486	1400
D1086.8	WBGene00008395	Uncharacterized protein	4.06169	1.36427	1.18612	1.30767	1.01016	1.0789	-1.29915	4.36328	2.3412	2.78932	2.58744	2.7282	2.35578	2.45076	1.96363	4.36328	2.3412	2.78932	2.58744	2.7282	2.35578	2.45076	1.96363	19.7404	3.71259	5.60516	4.80404	5.59182	3.50743	4.8442	2.56573	500	94	154	116	149	79	85	61
B0035.13	WBGene00007112	Uncharacterized protein	4.0587	1.24509	1.37285	-1.61988	1.56927	1.39547	1.2048	6.51506	4.49404	4.8103	4.95122	3.79816	5.14414	4.97479	4.76284	6.51506	4.49404	4.8103	4.95122	3.79816	5.14414	4.97479	4.76284	62.3158	21.5187	27.2809	30.94	13.1808	34.5171	32.1	25.2667	2587	896	1314	1292	605	1456	1045	959
F41E6.15	WBGene00044554	Uncharacterized protein	4.05679	1.71385	1.44919	1.63743	1.67224	1.34465	1.17178	4.44355	2.42321	3.20045	2.95846	3.13465	3.16499	2.85044	2.65191	4.44355	2.42321	3.20045	2.95846	3.13465	3.16499	2.85044	2.65191	20.4553	4.01452	7.95842	6.5478	7.82286	7.16139	6.68763	4.70138	231	46	105	75	98	83	60	49
grl-4	WBGene00001713	GRound-Like (grd related)	4.05473	1.62264	1.40443	1.05119	-1.05176	-1.3979	1.04067	5.22139	3.20178	3.90013	3.69177	3.2738	3.12897	2.71852	3.25929	5.22139	3.20178	3.90013	3.69177	3.2738	3.12897	2.71852	3.25929	29.2624	7.92546	13.8403	11.725	8.6908	6.95324	5.97845	7.64881	861	234	472	347	283	208	138	206
C09H10.9	WBGene00007503	Uncharacterized protein	4.04769	1.21611	1.32472	1.12251	1.11324	1.07569	1.06006	2.09908	0.0819851	0.364264	0.487673	0.248708	0.236756	0.187246	0.166137	2.09908	0.0819851	0.364264	0.487673	0.248708	0.236756	0.187246	0.166137	4.84291	0.052239	0.298168	0.395484	0.196756	0.161999	0.175415	0.106569	249	3	18	21	12	9	8	5
tsp-8	WBGene00006634	Tetraspanin	4.04146	1.02827	-1.0634	1.0586	-1.40815	-1.20185	-1.24532	4.01413	1.99925	2.03947	1.91056	2.08141	1.50545	1.73399	1.68273	4.01413	1.99925	2.03947	1.91056	2.08141	1.50545	1.73399	1.68273	16.4563	2.68433	2.94441	2.65309	3.27133	1.5751	2.48196	1.97733	649	107	135	106	143	64	77	72
Y18D10A.21	WBGene00012486	Uncharacterized protein	4.04057	1.13219	-1.04528	-1.02766	1.05894	-1.07035	-1.11	2.33441	0.319848	0.498966	0.25596	0.280485	0.40247	0.221759	0.16929	2.33441	0.319848	0.498966	0.25596	0.280485	0.40247	0.221759	0.16929	5.86547	0.224675	0.420958	0.197911	0.226297	0.289416	0.203737	0.109533	235	9	20	8	11	12	7	5
C44C1.1	WBGene00016641	Uncharacterized protein	4.03927	1.22072	1.134	1.05946	1.32593	1.226	-1.23995	5.23549	3.22139	3.50913	3.40282	3.30472	3.62839	3.51536	2.91111	5.23549	3.22139	3.50913	3.40282	3.30472	3.62839	3.51536	2.91111	29.4235	8.04708	10.1282	9.34424	8.92319	10.4956	11.0722	5.77719	1119	307	447	358	376	406	331	201
F55B11.1	WBGene00010083	Uncharacterized protein	4.03382	-1.40138	-1.44185	-1.75525	1.08799	-1.75879	-1.47982	4.01326	2.00111	1.51426	1.4732	1.18943	2.12278	1.18653	1.43569	4.01326	2.00111	1.51426	1.4732	1.18943	2.12278	1.18653	1.43569	16.4485	2.68703	1.75283	1.6866	1.26629	2.86272	1.40905	1.49839	3114	510	385	322	265	551	210	260
ipla-4	WBGene00017026	Intracelllar PhosphoLipase A family	4.02643	1.04301	-1.02093	1.10082	1.16312	1.03854	1.12765	2.4917	0.482196	0.542955	0.452316	0.620771	0.700193	0.536754	0.655516	2.4917	0.482196	0.542955	0.452316	0.620771	0.700193	0.536754	0.655516	6.58829	0.346232	0.463816	0.363869	0.53483	0.550948	0.531827	0.502152	513	27	42	29	46	44	33	36
C08G9.1	WBGene00015619	Uncharacterized protein	4.02473	1.04673	1.11405	1.19558	1.13708	-1.0346	1.11289	4.39542	2.38653	2.45241	2.54235	2.64424	2.57186	2.33745	2.54084	4.39542	2.38653	2.45241	2.54235	2.64424	2.57186	2.33745	2.54084	19.9948	3.88972	4.23715	4.61664	5.16908	4.27381	4.39548	4.30068	485	95	120	113	139	106	84	96
dct-16	WBGene00012615	DAF-16/FOXO Controlled, germline Tumor affecting	4.0213	-1.322	-1.04659	-1.1335	-1.3002	1.25002	-1.29531	11.3569	9.34923	8.94651	9.28353	9.16845	8.9705	9.67118	8.97593	11.3569	9.34923	8.94651	9.28353	9.16845	8.9705	9.67118	8.97593	4111.26	653.246	506.342	581.935	550.562	477.791	761.948	484.186	46531	7405	6644	6625	6886	5491	6759	5010
K01C8.1	WBGene00010456	Uncharacterized protein	4.02112	1.40555	1.3766	1.11384	1.01528	1.10986	1.05072	6.49946	4.49186	4.98299	4.95297	4.6474	4.51374	4.64223	4.56324	6.49946	4.49186	4.98299	4.95297	4.6474	4.51374	4.64223	4.56324	61.5824	21.4941	30.9602	30.9871	25.1735	21.3477	25.2175	21.5602	4290	1501	2502	2171	1939	1511	1377	1372
cpna-2	WBGene00015061	Copine family protein 2	4.00752	-1.87181	-1.70997	-1.68475	-1.39941	-1.35259	-1.26938	4.00044	1.99773	1.0933	1.22376	1.2452	1.51291	1.562	1.6536	4.00044	1.99773	1.0933	1.22376	1.2452	1.51291	1.562	1.6536	16.3049	2.67664	1.08023	1.24979	1.35428	1.58875	2.10983	1.92534	6879	898	945	963	1007	642	672	642
C11E4.7	WBGene00007521	Uncharacterized protein	4.00522	1.12809	-1.03956	-1.5585	-1.15311	-1.62394	-1.37008	3.02388	1.022	1.19588	0.966027	0.381841	0.816463	0.322498	0.567741	3.02388	1.022	1.19588	0.966027	0.381841	0.816463	0.322498	0.567741	9.5418	0.92899	1.23604	0.905149	0.319433	0.666451	0.305173	0.428574	478	49	72	47	21	34	14	23
cln-3.1	WBGene00000539	Battenin	4.00113	1.60233	1.41892	-1.13199	1.27183	1.41764	1.12493	3.0667	1.06629	1.74647	1.57109	0.887432	1.4132	1.56979	1.23613	3.0667	1.06629	1.74647	1.57109	0.887432	1.4132	1.56979	1.23613	9.74684	0.988874	2.22892	1.87333	0.823573	1.41514	2.12546	1.18632	574	58	154	110	53	86	96	64
tps-2	WBGene00006603	Alpha,alpha-trehalose-phosphate synthase [UDP-forming] 2	4.00034	-1.3688	-1.38126	-1.13301	-1.38682	-1.23577	-1.02296	6.17493	4.17481	3.7219	3.70882	3.99466	3.70303	3.86941	4.14206	6.17493	4.17481	3.7219	3.70882	3.99466	3.70303	3.86941	4.14206	49.3786	17.1324	11.9755	11.8803	15.1704	11.1406	14.2619	15.4824	6418	2617	1729	1582	1927	1358	1441	1973
tag-234	WBGene00018874	Uncharacterized protein	3.99762	1.48919	1.46162	2.2355	1.32705	1.87172	1.41591	5.89689	3.89774	4.47228	4.44531	5.05834	4.30597	4.8021	4.39947	5.89689	3.89774	4.47228	4.44531	5.05834	4.30597	4.8021	4.39947	41.9262	13.8112	21.317	21.2777	34.4721	18.0137	28.4003	18.9959	655	216	386	334	595	286	348	271
F53A9.1	WBGene00018724	Uncharacterized protein	3.99354	1.32762	-1.1772	1.951	1.04984	1.05928	1.86393	5.72188	3.72422	4.13306	3.48885	4.68843	3.79438	3.8073	4.62256	5.72188	3.72422	4.13306	3.48885	4.68843	3.79438	3.8073	4.62256	38.057	12.1875	16.4293	10.0205	25.9244	11.9759	13.6293	22.6034	414	133	208	110	312	133	117	225
R10H10.3	WBGene00011222	Uncharacterized protein	3.98679	-1.03569	1.0063	-1.74767	1.0174	1.39282	-1.68679	7.13936	5.14414	5.09354	5.1532	4.33871	5.16903	5.62215	4.38986	7.13936	5.14414	5.09354	5.1532	4.33871	5.16903	5.62215	4.38986	106.101	35.1393	33.4714	36.0461	19.6561	35.2593	50.9133	18.8378	5395	1791	1975	1844	1105	1821	2030	875
K02D7.1	WBGene00019298	Purine nucleoside phosphorylase	3.98649	-1.85619	-2.51786	-1.15581	-1.72566	-1.11241	-1.29651	7.26475	5.26963	4.37729	3.93744	5.06073	4.48249	5.11595	4.895	7.26475	5.26963	4.37729	3.93744	5.06073	4.48249	5.11595	4.895	120.624	38.418	19.8146	14.3095	34.5047	20.8651	35.8065	28.0381	5147	1643	979	618	1634	910	1196	1095
swt-7	WBGene00019645	Sugar transporter SWEET	3.98631	1.27688	1.06248	1.02068	1.09049	1.10304	-1.02004	6.62645	4.6314	4.98402	4.71883	4.66093	4.75638	4.77289	4.60277	6.62645	4.6314	4.98402	4.71883	4.66093	4.75638	4.77289	4.60277	67.6424	23.8125	30.9814	26.162	25.4572	25.6448	27.6846	22.2822	2120	748	1127	825	882	817	681	638
R07E4.3	WBGene00019937	Uncharacterized protein	3.98494	1.22289	1.07696	-1.05451	1.19193	1.32083	-1.07747	6.75256	4.758	5.0483	4.86496	4.68143	5.0113	5.15945	4.65036	6.75256	4.758	5.0483	4.86496	4.68143	5.0113	5.15945	4.65036	75.1715	26.4658	32.1177	28.8711	25.8417	31.2212	36.8123	23.0862	953	337	473	369	363	402	366	268
F49E2.2	WBGene00009886	Uncharacterized protein	3.98378	-1.03199	1.19639	-1.02109	1.24272	1.13	1.03056	5.15741	3.16328	3.11785	3.42196	3.13317	3.47678	3.3396	3.2067	5.15741	3.16328	3.11785	3.42196	3.13317	3.47678	3.3396	3.2067	28.5227	7.63977	7.41687	9.53076	7.81804	9.23904	9.70455	7.36138	2087	560	630	700	632	687	557	492
elo-2	WBGene00001240	Elongation of very long chain fatty acids protein	3.97505	1.18665	1.08331	-2.24303	1.14353	-1.90006	-1.54125	7.79306	5.80209	6.04898	5.91754	4.63664	5.99558	4.87604	5.17799	7.79306	5.80209	6.04898	5.91754	4.63664	5.99558	4.87604	5.17799	200.45	56.8258	66.8904	62.7131	24.7718	66.1601	30.0081	34.924	7679	2182	2973	2417	1049	2575	902	1223
T04F3.4	WBGene00011439	Uncharacterized protein	3.97388	-1.08872	1.26851	-1.63503	1.10459	-1.09399	-1.42374	4.9087	2.91815	2.79552	3.26129	2.20883	3.06166	2.78856	2.40847	4.9087	2.91815	2.79552	3.26129	2.20883	3.06166	2.78856	2.40847	25.5255	6.23055	5.63256	8.3373	3.6485	6.49855	6.3158	3.80002	456	112	117	150	72	118	89	62
C31H5.6	WBGene00007857	Uncharacterized protein	3.96934	1.51073	1.49351	1.48972	1.39868	1.33614	1.21645	6.00899	4.02009	4.61533	4.59879	4.59513	4.50416	4.43816	4.30276	6.00899	4.02009	4.61533	4.59879	4.59513	4.50416	4.43816	4.30276	44.518	15.1737	23.7535	23.7499	24.0451	21.1978	21.6251	17.7232	2410	811	1470	1260	1407	1147	921	868
D1086.5	WBGene00008392	Uncharacterized protein	3.95878	-1.11426	-1.06495	-1.23334	-1.97157	-1.38301	-1.50804	3.56156	1.57651	1.42042	1.48572	1.27394	0.597162	1.10869	0.983828	3.56156	1.57651	1.42042	1.48572	1.27394	0.597162	1.10869	0.983828	12.8007	1.76464	1.5891	1.70638	1.39335	0.450934	1.28209	0.862474	403	56	59	55	49	15	32	25
ampd-1	WBGene00016415	Adenosine MonoPhosphate Deaminase homolog	3.95641	-1.07455	-1.02294	-1.32957	1.00937	-1.19039	-1.30721	6.98047	4.99628	4.89254	4.96356	4.58532	5.00973	4.74485	4.60978	6.98047	4.99628	4.89254	4.96356	4.58532	5.00973	4.74485	4.60978	90.5746	31.5389	29.1811	31.1356	23.835	31.1718	27.1045	22.3761	10093	3475	3749	3460	2912	3490	2356	2263
nkb-3	WBGene00010117	Na+/K+ ATPase, Beta subunit	3.95604	1.32443	1.58079	1.15784	1.00332	1.40019	1.3138	6.8739	4.88985	5.29522	5.55049	5.10129	4.89463	5.37547	5.28359	6.8739	4.88985	5.29522	5.55049	5.10129	4.89463	5.37547	5.28359	82.9461	28.7683	38.8737	47.8664	35.4213	28.412	42.7756	38.3763	3533	1231	1920	2050	1672	1230	1427	1495
pyk-2	WBGene00014001	Pyruvate kinase	3.94762	1.10722	1.21708	-1.01259	-1.03045	1.34683	-1.02237	6.76374	4.78276	4.9297	5.06619	4.76471	4.73948	5.21233	4.75084	6.76374	4.78276	4.9297	5.06619	4.76471	4.73948	5.21233	4.75084	75.9206	26.8411	29.9983	33.3618	27.4599	25.389	38.2018	25.0399	5434	1924	2492	2400	2163	1843	2129	1636
ZK809.1	WBGene00014085	Uncharacterized protein	3.94677	1.0082	-1.23253	-1.25726	1.01964	-1.20764	-1.09144	2.34565	0.364979	0.376765	0.0633593	0.0346977	0.393037	0.0927906	0.238753	2.34565	0.364979	0.376765	0.0633593	0.0346977	0.393037	0.0927906	0.238753	5.90951	0.259217	0.30754	0.046734	0.020535	0.279926	0.085377	0.164874	354	16	22	3	2	17	4	10
K07A1.13	WBGene00010617	Uncharacterized protein	3.93782	1.00941	1.2945	1.47434	1.02294	1.46329	1.69115	5.56237	3.58497	3.59848	3.95737	4.14504	3.6177	4.13419	4.34298	5.56237	3.58497	3.59848	3.95737	4.14504	3.6177	4.13419	4.34298	34.821	11.0009	10.9332	14.5816	16.9232	10.3981	17.1602	18.2621	859	272	313	362	462	261	332	412
F13B6.3	WBGene00017418	Uncharacterized protein	3.92878	1.39286	1.18711	-1.05971	1.1366	1.17305	1.1271	3.40541	1.43133	1.90938	1.67878	1.34766	1.61606	1.6616	1.60395	3.40541	1.43133	1.90938	1.67878	1.34766	1.61606	1.6616	1.60395	11.7295	1.52255	2.60349	2.10322	1.51645	1.75343	2.29771	1.83501	713	93	184	129	102	109	110	102
F32D8.11	WBGene00043302	Uncharacterized protein	3.9211	-1.07207	1.2115	-1.24432	-1.58908	-1.40297	-1.32039	3.65614	1.68488	1.58448	1.96167	1.36953	1.01669	1.1964	1.28392	3.65614	1.68488	1.58448	1.96167	1.36953	1.01669	1.1964	1.28392	13.5721	1.97477	1.89111	2.76129	1.55275	0.87471	1.42657	1.25529	129	19	21	27	17	9	11	11
C46F2.1	WBGene00016714	Uncharacterized protein	3.91639	-1.08643	-1.40706	-1.64658	-1.30064	-2.17655	-1.13726	4.93205	2.96253	2.84293	2.46984	2.24306	2.58331	1.84049	2.77697	4.93205	2.96253	2.84293	2.46984	2.24306	2.58331	1.84049	2.77697	25.892	6.47873	5.83494	4.33274	3.75457	4.31771	2.79679	5.24643	884	222	232	149	142	150	75	164
Y95B8A.4	WBGene00022385	Uncharacterized protein	3.91069	-1.04086	1.14989	1.13958	-1.04727	1.00812	-1.1129	2.29514	0.327717	0.269934	0.529217	0.516225	0.261088	0.339386	0.173387	2.29514	0.327717	0.269934	0.529217	0.516225	0.261088	0.339386	0.173387	5.67351	0.230468	0.217589	0.431308	0.433451	0.176063	0.321991	0.111872	223	10	10	17	19	7	10	5
D1086.11	WBGene00044081	Uncharacterized protein	3.90987	-1.10028	-1.05337	-1.0581	1.09982	-1.00501	-1.25084	8.00783	6.04071	5.90284	5.9657	5.95924	6.17798	6.03351	5.71781	8.00783	6.04071	5.90284	5.9657	5.95924	6.17798	6.03351	5.71781	248.123	66.8436	60.2136	64.6955	67.3894	75.2228	67.9904	53.2465	7063	1909	1989	1845	2124	2181	1542	1382
F18E9.3	WBGene00017569	Uncharacterized protein	3.90623	-1.00573	-1.17903	-1.39401	-1.23504	1.21313	-1.06172	3.52538	1.5596	1.55136	1.32201	1.08036	1.25504	1.83833	1.4732	3.52538	1.5596	1.55136	1.32201	1.08036	1.25504	1.83833	1.4732	12.5388	1.7273	1.82689	1.40333	1.1152	1.17835	2.79474	1.5713	750	104	127	85	74	72	131	86
nmy-1	WBGene00003776	Non-muscle MYosin	3.89948	-1.07326	-1.05952	-1.20402	1.01244	-1.06663	-1.04096	6.4504	4.48711	4.38512	4.40371	4.21926	4.50495	4.39405	4.4292	6.4504	4.48711	4.38512	4.40371	4.21926	4.50495	4.39405	4.4292	59.4707	21.4283	19.9733	20.509	17.9508	21.2144	21.0155	19.3868	16270	5874	6340	5644	5429	5896	4508	4845
ZK6.11	WBGene00022645	Uncharacterized protein	3.89878	-2.00176	-2.30296	-3.1458	-1.57711	-6.78652	-6.45978	8.55114	6.58812	5.58685	5.38463	4.93469	5.93083	3.82545	3.89663	8.55114	6.58812	5.58685	5.38463	4.93469	5.93083	3.82545	3.89663	427.026	97.9479	48.0885	42.6507	31.3593	63.0541	13.8095	12.7148	23019	5291	3008	2313	1869	3453	584	628
K06A5.3	WBGene00019431	Major sperm protein	3.89633	-1.01564	-1.02484	1.05059	1.01173	1.00966	-1.11922	3.26952	1.3074	1.28502	1.272	1.3786	1.32422	1.32128	1.14491	3.26952	1.3074	1.28502	1.272	1.3786	1.32422	1.32128	1.14491	10.8952	1.32448	1.36504	1.32045	1.56378	1.28594	1.67101	1.05712	222	27	33	28	36	27	27	20
poml-2	WBGene00017089	PON (paraoxonase) and MEC-6 Like	3.89411	-1.05129	1.0234	-1.11502	-1.27309	-1.16842	-1.09807	3.4043	1.443	1.37084	1.47637	1.28594	1.09467	1.21844	1.30803	3.4043	1.443	1.37084	1.47637	1.28594	1.09467	1.21844	1.30803	11.722	1.54018	1.49484	1.68953	1.41207	0.967695	1.46708	1.28665	601	80	89	88	81	51	59	61
C04F12.16	WBGene00219286	Uncharacterized protein	3.88837	-1.24943	-1.23614	-1.03353	-1.53676	-1.5452	-1.10053	3.87419	1.91503	1.59376	1.60918	1.86744	1.29514	1.28724	1.77683	3.87419	1.91503	1.59376	1.60918	1.86744	1.29514	1.28724	1.77683	15.1745	2.4656	1.91036	1.95518	2.63646	1.25004	1.6003	2.16341	140	23	21	19	27	12	12	19
T28D6.7	WBGene00012127	Uncharacterized protein	3.88152	1.07012	1.18591	-1.20709	1.16025	-1.03106	-1.23479	4.52065	2.56402	2.6618	2.81002	2.29249	2.77846	2.51989	2.25975	4.52065	2.56402	2.6618	2.81002	2.29249	2.77846	2.51989	2.25975	21.3946	4.54724	5.10583	5.78861	3.90117	5.11542	5.0988	3.36478	963	206	267	262	195	234	180	139
sgk-1	WBGene00004789	Serine/threonine-protein kinase sgk-1	3.87814	1.17318	1.32303	1.18322	1.22345	1.28914	1.06473	5.44422	3.48885	3.71927	3.8927	3.73157	3.77981	3.85526	3.57934	5.44422	3.48885	3.71927	3.8927	3.73157	3.77981	3.85526	3.57934	32.7212	10.2049	11.954	13.7341	12.4346	11.833	14.113	9.78817	2074	650	881	877	873	764	703	568
dhp-1	WBGene00000963	Dihydropyrimidinase 1	3.87626	-1.31235	-1.58636	-1.27029	-1.39297	1.08914	-1.69237	4.76793	2.81327	2.42112	2.14755	2.46811	2.3351	2.93645	2.05422	4.76793	2.81327	2.42112	2.14755	2.46811	2.3351	2.93645	2.05422	23.805	5.63038	4.12602	3.24991	4.51992	3.45528	7.11113	2.7971	1625	386	327	224	342	240	381	175
Y71F9B.13	WBGene00022131	Non-coding transcript of protein-coding gene Y71F9B.13b	3.87504	1.40589	1.32696	1.58034	1.17081	1.33605	1.38571	5.10366	3.14944	3.64093	3.55757	3.80968	3.37694	3.56741	3.62007	5.10366	3.14944	3.64093	3.55757	3.80968	3.37694	3.56741	3.62007	27.9175	7.55928	11.2798	10.6038	13.2684	8.51805	11.5007	10.1507	915	239	451	347	486	287	292	304
ifd-2	WBGene00002058	Intermediate filament protein ifd-2	3.87184	1.82057	1.34535	1.86992	2.31304	1.66045	1.1603	4.14257	2.18956	3.05394	2.61754	3.09253	3.39935	2.92113	2.40405	4.14257	2.18956	3.05394	2.61754	3.09253	3.39935	2.92113	2.40405	17.6452	3.19728	7.015	4.91166	7.61481	8.68784	7.05316	3.78913	1092	199	504	306	521	546	342	215
math-26	WBGene00018100	MATH (meprin-associated Traf homology) domain containing	3.8686	1.15393	1.29877	1.0656	1.14451	1.27744	-1.01441	4.66093	2.70912	2.91568	3.08626	2.80079	2.90385	3.06237	2.68849	4.66093	2.70912	2.91568	3.08626	2.80079	2.90385	3.06237	2.68849	22.629	5.17146	6.22699	7.22702	5.96462	5.65551	7.8044	4.84994	2592	594	828	833	755	658	701	508
C28A5.6	WBGene00007791	Uncharacterized protein	3.86857	1.13039	1.21055	1.14707	1.21566	-1.07774	1.19566	2.98289	1.03109	1.20791	1.30675	1.22904	1.31284	0.923084	1.2889	2.98289	1.03109	1.20791	1.30675	1.22904	1.31284	0.923084	1.2889	9.32478	0.943212	1.25706	1.37888	1.32882	1.27111	1.00348	1.25895	1384	141	217	206	218	192	117	171
F20D1.9	WBGene00008979	Uncharacterized protein	3.86435	1.08778	1.15994	1.01517	-1.03246	1.02661	-1.07428	6.13159	4.18137	4.30276	4.39542	4.20309	4.13529	4.21926	4.078	6.13159	4.18137	4.30276	4.39542	4.20309	4.13529	4.21926	4.078	47.9941	17.2399	18.8402	20.3317	17.7278	15.8203	18.349	14.6822	2100	756	957	895	858	703	630	587
tni-3	WBGene00006585	Troponin I 3	3.85805	1.01563	-1.36916	1.10083	1.05078	-1.29463	1.04423	4.69038	2.74251	2.76488	2.28922	2.8811	2.81396	2.36997	2.80495	4.69038	2.74251	2.76488	2.28922	2.8811	2.81396	2.36997	2.80495	22.863	5.29895	5.51973	3.69321	6.37053	5.27293	4.53998	5.3732	832	194	233	136	257	195	130	179
mab-31	WBGene00021834	Uncharacterized protein	3.84234	1.29516	1.33561	1.21351	1.1662	1.16218	1.21914	5.4737	3.53171	3.90484	3.94922	3.8109	3.75353	3.74855	3.81758	5.4737	3.53171	3.90484	3.94922	3.8109	3.75353	3.74855	3.81758	33.2124	10.5796	13.8791	14.4357	13.2837	11.6114	13.0263	11.9347	1981	633	961	866	876	704	609	650
aat-6	WBGene00000007	Amino Acid Transporter	3.83551	1.07951	1.17619	1.04553	1.40151	1.34307	-1.07923	3.66342	1.724	1.83438	1.95812	1.78824	2.21098	2.14954	1.61399	3.66342	1.724	1.83438	1.95812	1.78824	2.21098	2.14954	1.61399	13.6045	2.04438	2.40334	2.75348	2.42617	3.09837	3.71523	1.85264	977	148	201	200	193	226	209	123
cpr-8	WBGene00021070	Cysteine PRotease related	3.82762	26.0526	31.3823	16.3606	17.4405	21.8532	20.8232	3.2738	1.33736	6.04071	6.30923	5.36951	5.46173	5.78713	5.71748	3.2738	1.33736	6.04071	6.30923	5.36951	5.46173	5.78713	5.71748	10.9324	1.37906	66.569	82.8143	43.346	44.4119	57.1992	53.2351	488	45	3506	3717	2189	2046	2056	2218
clec-83	WBGene00021879	C-type LECtin	3.82366	-1.12542	-1.17418	-1.07598	1.07176	-1.0114	-1.34444	7.08021	5.14526	4.97479	4.9136	5.0396	5.24523	5.1289	4.71825	7.08021	5.14526	4.97479	4.9136	5.0396	5.24523	5.1289	4.71825	100.106	35.1777	30.8331	29.9851	34.0241	37.5839	36.1634	24.4379	3319	1169	1186	1000	1247	1266	940	741
hpd-1	WBGene00001993	4-hydroxyphenylpyruvate dioxygenase	3.82188	1.09135	-1.03014	1.622	-1.28791	1.30207	1.49298	7.56057	5.62629	5.7524	5.58345	6.32406	5.26126	6.00709	6.20449	7.56057	5.62629	5.7524	5.58345	6.32406	5.26126	6.00709	6.20449	165.104	49.4349	54.4759	49.307	86.7536	38.0177	66.8533	76.297	9062	2719	3469	2722	5263	2120	2877	3826
Y39A1C.1	WBGene00012662	Uncharacterized protein	3.81877	2.42722	1.76947	1.96645	1.64411	1.39526	1.82732	3.65341	1.7203	2.99961	2.54362	2.6959	2.43761	2.20083	2.59003	3.65341	1.7203	2.99961	2.54362	2.6959	2.43761	2.20083	2.59003	13.5552	2.03854	6.64623	4.61745	5.4326	3.76392	3.88228	4.47419	223	34	127	77	99	63	51	68
T05B11.4	WBGene00020247	Uncharacterized protein	3.81165	-1.08849	-1.18704	-1.05611	1.04177	-1.35196	-1.24007	4.19254	2.26212	2.1398	2.01475	2.18337	2.32116	1.82707	1.9517	4.19254	2.26212	2.1398	2.01475	2.18337	2.32116	1.82707	1.9517	18.028	3.4391	3.23187	2.89208	3.58993	3.39816	2.76954	2.53552	1198	229	250	194	264	230	145	154
F36G9.3	WBGene00009485	Uncharacterized protein	3.81156	1.80227	2.05393	1.89461	2.07358	2.47611	1.32151	2.92752	0.997138	1.84695	2.03553	1.91904	2.04926	2.30521	1.39932	2.92752	0.997138	1.84695	2.03553	1.91904	2.04926	2.30521	1.39932	9.0367	0.901436	2.42882	2.95671	2.74563	2.66288	4.27739	1.44352	534	55	166	176	178	158	195	80
T28F3.8	WBGene00012134	Uncharacterized protein	3.8103	1.52464	1.83554	1.0263	1.44978	1.83769	1.51387	5.49186	3.56195	4.17042	4.43816	3.5994	4.09778	4.43984	4.16019	5.49186	3.56195	4.17042	4.43816	3.5994	4.09778	4.43984	4.16019	33.5441	10.7926	16.8767	21.1442	11.1661	15.3444	21.6551	15.7157	2271	733	1326	1440	836	1056	1150	972
Y75B12B.3	WBGene00013568	Uncharacterized protein	3.81007	1.06211	1.56855	1.03626	1.53719	1.05823	1.17274	2.88434	0.954522	1.04145	1.60395	1.00591	1.57481	1.03618	1.18441	2.88434	0.954522	1.04145	1.60395	1.00591	1.57481	1.03618	1.18441	8.76306	0.845272	1.00733	1.946	0.996374	1.67723	1.16141	1.11722	116	12	16	26	15	23	13	14
irld-8	WBGene00018360	Insulin/EGF-Receptor L Domain protein	3.808	1.18625	1.17139	-1.04757	1.22314	1.31353	-1.04144	2.17759	0.248561	0.494968	0.476781	0.181518	0.539147	0.642008	0.189984	2.17759	0.248561	0.494968	0.476781	0.181518	0.539147	0.642008	0.189984	5.158	0.172276	0.416966	0.383442	0.140048	0.398924	0.658185	0.12689	267	9	25	20	9	21	27	6
C12D12.1	WBGene00015713	Uncharacterized protein	3.80754	1.51073	1.6792	-1.25866	1.42659	1.45878	1.01197	6.29161	4.36275	4.958	5.11053	4.03087	4.87533	4.90751	4.37992	6.29161	4.36275	4.958	5.11053	4.03087	4.87533	4.90751	4.37992	53.4167	19.5605	30.5106	34.6041	15.4864	27.9846	30.6324	18.7314	5372	1955	3629	3592	1715	3044	2571	1864
mps-2	WBGene00019282	MiRP K channel accessory Subunit	3.80687	-1.16807	-1.08836	-1.21042	-1.20117	1.31852	-1.63079	4.56422	2.63561	2.41148	2.51346	2.36011	2.37117	3.03453	1.93004	4.56422	2.63561	2.41148	2.51346	2.36011	2.37117	3.03453	1.93004	21.7317	4.84239	4.08709	4.50004	4.14257	3.55531	7.63955	2.46754	439	96	108	100	90	83	122	43
cyp-35A2	WBGene00015400	CYtochrome P450 family	3.79886	2.25139	2.44216	2.22483	1.21323	3.02145	2.07346	6.08901	4.16344	5.33426	5.4516	5.31714	4.44229	5.75868	5.21548	6.08901	4.16344	5.33426	5.4516	5.31714	4.44229	5.75868	5.21548	47.0101	17.0086	39.8418	44.5243	41.8283	20.2113	56	36.0581	3242	1176	3188	3088	3188	1416	3028	2272
asb-2	WBGene00000207	ATP Synthase B homolog	3.7914	1.03328	-1.0332	-1.15999	-1.17381	-1.07621	-1.23591	8.44221	6.51948	6.56672	6.47236	6.30538	6.28828	6.41352	6.21391	8.44221	6.51948	6.56672	6.47236	6.30538	6.28828	6.41352	6.21391	390.339	92.9242	96.7915	92.7223	85.6725	81.0871	88.2123	76.7661	16638	3969	4787	3976	4037	3511	2948	2989
clec-53	WBGene00020191	C-type LECtin	3.78019	-1.36667	-1.49297	-2.58398	-2.07872	-1.42835	-2.27128	3.66594	1.74748	1.29682	1.1693	0.377886	0.69178	1.23312	0.563974	3.66594	1.74748	1.29682	1.1693	0.377886	0.69178	1.23312	0.563974	13.6066	2.07784	1.38451	1.17896	0.315277	0.544266	1.49106	0.425574	586	90	70	52	15	24	51	17
mua-6	WBGene00003485	Intermediate filament protein ifa-2	3.77857	1.2319	-1.00893	-1.29374	1.05316	-2.01476	-1.39741	5.58874	3.6709	3.97179	3.65808	3.29936	3.74563	2.6603	3.18815	5.58874	3.6709	3.97179	3.65808	3.29936	3.74563	2.6603	3.18815	35.3261	11.7642	14.5584	11.3647	8.88666	11.5176	5.70851	7.24815	2864	956	1370	927	797	949	363	537
pat-2	WBGene00003929	Integrin alpha pat-2	3.77238	-1.40862	-1.29295	-1.39094	-1.24836	-1.32702	-1.42621	4.36788	2.45241	1.95812	2.08174	1.97635	2.13237	2.04423	1.94022	4.36788	2.45241	1.95812	2.08174	1.97635	2.13237	2.04423	1.94022	19.7692	4.11563	2.72013	3.07149	2.92135	2.89272	3.37617	2.49981	3379	705	540	529	552	503	453	391
math-4	WBGene00015609	MATH (meprin-associated Traf homology) domain containing	3.76974	1.35419	1.43239	-1.09553	1.27478	1.235	-1.20459	3.4562	1.54174	1.97916	2.06017	1.41011	1.89198	1.84625	1.2732	3.4562	1.54174	1.97916	2.06017	1.41011	1.89198	1.84625	1.2732	12.0728	1.69387	2.78493	3.01623	1.62125	2.31097	2.80825	1.23855	1403	198	377	353	209	298	256	133
F25F2.1	WBGene00009115	Uncharacterized protein	3.76877	-1.09389	1.1705	-1.06459	1.04365	-1.08312	1.05074	2.63906	0.724969	0.5955	0.952089	0.634673	0.786613	0.60978	0.79638	2.63906	0.724969	0.5955	0.952089	0.634673	0.786613	0.60978	0.79638	7.38987	0.579744	0.515151	0.889706	0.547079	0.633499	0.619438	0.647289	603	48	49	73	50	53	40	49
T16G1.7	WBGene00011801	Uncharacterized protein	3.75632	-2.13107	-2.28326	-1.43608	-1.64944	-3.51045	-2.10215	5.41719	3.50787	2.41629	2.31677	2.98573	2.78589	1.69621	2.436	5.41719	3.50787	2.41629	2.31677	2.98573	2.78589	1.69621	2.436	32.2318	10.3692	4.10995	3.7736	6.95109	5.15843	2.38332	3.90796	1962	633	291	232	468	319	114	218
elo-9	WBGene00001247	Elongation of very long chain fatty acids protein	3.74765	1.64989	1.64887	1.06661	1.47445	1.37322	1.2933	3.79069	1.88471	2.60707	2.60618	1.97774	2.44488	2.34227	2.25576	3.79069	1.88471	2.60707	2.60618	1.97774	2.44488	2.34227	2.25576	14.5098	2.38764	4.89908	4.86755	2.92595	3.79411	4.41774	3.35459	581	96	228	196	130	155	139	123
cgr-1	WBGene00020847	CRAL/TRIO and GOLD domain suppressor of activated Ras	3.74753	-1.12475	-1.13845	-1.34731	-1.24716	-1.11389	-1.1997	5.09063	3.18469	3.01509	2.99762	2.75461	2.86604	3.02909	2.92202	5.09063	3.18469	3.01509	2.99762	2.75461	2.86604	3.02909	2.92202	27.7251	7.78313	6.75057	6.77191	5.73528	5.4755	7.60984	5.80834	1483	418	419	365	340	298	320	284
clec-57	WBGene00008594	C-type LECtin	3.74653	-1.25279	-1.12214	-2.10329	-2.06727	-1.51293	-1.86166	3.2719	1.36635	1.0412	1.2001	0.293698	0.318621	0.769005	0.469761	3.2719	1.36635	1.0412	1.2001	0.293698	0.318621	0.769005	0.469761	10.9119	1.41912	1.00681	1.21534	0.239093	0.217528	0.806596	0.343756	574	75	62	65	14	12	34	17
Y69A2AR.22	WBGene00022093	Uncharacterized protein	3.74637	1.45278	1.40362	1.90533	1.34524	1.14474	1.54642	3.48946	1.58397	2.12278	2.07312	2.51401	2.01183	1.77899	2.2129	3.48946	1.58397	2.12278	2.07312	2.51401	2.01183	1.77899	2.2129	12.317	1.77168	3.18292	3.056	4.70243	2.57535	2.61108	3.23073	349	51	105	87	147	74	58	84
hmit-1.3	WBGene00010811	H(+) MyoInositol coTransporter	3.74397	-1.77373	-1.69247	-1.41794	-1.5371	-1.04871	-1.45311	5.18913	3.28456	2.45777	2.52543	2.78076	2.66435	3.21594	2.74541	5.18913	3.28456	2.45777	2.52543	2.78076	2.66435	3.21594	2.74541	28.8325	8.40517	4.25884	4.54589	5.87648	4.64403	8.78031	5.08755	2430	710	417	386	548	398	581	392
R07E3.1	WBGene00011102	Uncharacterized protein	3.73951	-1.45566	-1.21273	-1.69073	-1.73422	-1.59655	-1.12467	7.07896	5.17611	4.63444	4.89785	4.41847	4.38182	4.50116	5.00661	7.07896	5.17611	4.63444	4.89785	4.41847	4.38182	4.50116	5.00661	100.005	35.97	24.0342	29.6329	20.9274	19.2959	22.7427	30.5557	5522	1957	1563	1629	1299	1101	1001	1474
Y106G6H.1	WBGene00013716	Uncharacterized protein	3.7337	1.07575	1.40859	-1.33786	-1.00669	1.26054	1.06085	4.41158	2.51097	2.61632	3.00522	2.09105	2.50136	2.84501	2.59619	4.41158	2.51097	2.61632	3.00522	2.09105	2.50136	2.84501	2.59619	20.1496	4.32779	4.92969	6.81085	3.31208	4.01211	6.66456	4.49339	1275	275	362	434	232	258	331	260
F13D12.9	WBGene00008743	Uncharacterized protein	3.72821	-1.5221	-1.43376	1.20031	-1.24565	1.10007	-1.00353	3.23877	1.34028	0.734223	0.820476	1.60369	1.02338	1.47788	1.3352	3.23877	1.34028	0.734223	0.820476	1.60369	1.02338	1.47788	1.3352	10.6987	1.38273	0.647679	0.737388	2.0035	0.88421	1.92329	1.33105	676	88	48	47	140	57	96	77
C35A5.3	WBGene00007947	Uncharacterized protein	3.72214	1.59573	1.4068	-1.16076	1.03091	-1.57962	-1.16854	3.85526	1.95913	2.63334	2.45155	1.74405	2.00304	1.29955	1.73442	3.85526	1.95913	2.63334	2.45155	1.74405	2.00304	1.29955	1.73442	15.0391	2.58974	4.98773	4.25732	2.31383	2.54983	1.62816	2.07713	966	167	372	275	165	167	82	122
C06G4.4	WBGene00015558	Uncharacterized protein	3.71615	1.06191	1.42929	1.57139	1.70266	1.11153	1.66802	2.97977	1.08596	1.17262	1.60126	1.738	1.85375	1.23851	1.8241	2.97977	1.08596	1.17262	1.60126	1.738	1.85375	1.23851	1.8241	9.31587	1.01658	1.20033	1.9396	2.29912	2.25002	1.50288	2.24159	169	19	26	36	47	42	22	38
C23G10.1	WBGene00016010	Putative serine/threonine-protein phosphatase C23G10.1	3.71291	1.14766	1.58935	1.10778	1.29605	1.12529	1.19639	2.10986	0.217314	0.416012	0.885755	0.364979	0.591434	0.387616	0.475999	2.10986	0.217314	0.416012	0.885755	0.364979	0.591434	0.387616	0.475999	4.88258	0.150101	0.336831	0.810208	0.301438	0.445851	0.369637	0.351445	270	10	25	50	22	25	19	21
C15H9.9	WBGene00015803	Uncharacterized protein	3.71143	1.22185	1.07677	1.00439	-1.16752	-1.04871	-1.19051	7.92465	6.03267	6.32174	6.13938	6.039	5.80923	5.96406	5.7811	7.92465	6.03267	6.32174	6.13938	6.039	5.80923	5.96406	5.7811	228.295	66.3414	81.622	73.6608	71.4818	57.3653	64.6175	56.0114	4389	1278	1821	1425	1519	1121	974	984
F23F12.12	WBGene00017756	Uncharacterized protein	3.69798	1.59012	1.37602	1.60827	-1.10344	1.0463	1.26388	7.13573	5.24899	5.91813	5.70949	5.93451	5.10698	5.31429	5.58685	7.13573	5.24899	5.91813	5.70949	5.93451	5.10698	5.31429	5.58685	105.499	37.9736	60.9645	53.6403	65.638	33.6816	41.1157	48.2226	1264	456	848	647	870	410	387	528
unc-98	WBGene00006827	Zinc finger protein unc-98	3.6961	-1.09369	1.10749	-1.00574	-1.01	-1.16007	-1.21938	4.00582	2.11981	1.99061	2.2671	2.11155	2.10545	1.90561	1.83366	4.00582	2.11981	1.99061	2.2671	2.11155	2.10545	1.90561	1.83366	16.3805	2.99145	2.81465	3.62617	3.36366	2.81055	2.98014	2.25955	710	130	142	159	162	124	102	90
C18H9.5	WBGene00016003	Uncharacterized protein	3.69438	-1.08377	-1.4356	1.22657	-1.41067	1.43708	1.06142	3.61975	1.73442	1.61837	1.21276	2.02905	1.23804	2.25756	1.82042	3.61975	1.73442	1.61837	1.21276	2.02905	1.23804	2.25756	1.82042	13.2747	2.05885	1.9622	1.23344	3.09309	1.15702	4.10859	2.2363	860	134	148	81	222	77	209	133
apm-1	WBGene00000150	AdaPtin, Mu/medium chain (clathrin associated complex)	3.69109	1.04393	-1.00097	-1.13841	-1.11451	1.00686	-1.00522	5.61981	3.73576	3.79779	3.73436	3.54874	3.57934	3.74563	3.72825	5.61981	3.73576	3.79779	3.73436	3.54874	3.57934	3.74563	3.72825	35.9099	12.316	12.8047	12.1705	10.7239	10.0675	12.9832	11.161	2136	735	884	729	706	609	606	607
acdh-4	WBGene00020419	Acyl CoA DeHydrogenase	3.6907	-1.18122	-1.16447	-1.05695	1.01072	1.31013	1.07421	3.34794	1.46404	1.22376	1.24437	1.38414	1.47942	1.85375	1.56731	3.34794	1.46404	1.22376	1.24437	1.38414	1.47942	1.85375	1.56731	11.3795	1.56789	1.27113	1.2759	1.57579	1.5283	2.83134	1.75292	594	79	75	66	90	75	105	85
trap-2	WBGene00020216	Translocon-associated protein subunit beta	3.67998	1.11215	-1.05601	-1.32028	-1.04886	-1.11041	-1.25662	8.42059	6.54089	6.69424	6.46227	6.14005	6.47207	6.3898	6.21134	8.42059	6.54089	6.69424	6.46227	6.14005	6.47207	6.3898	6.21134	384.408	94.432	105.69	92.2737	76.5657	92.8966	86.8861	76.5938	10121	2492	3229	2444	2229	2485	1794	1842
W06A7.4	WBGene00012293	Uncharacterized protein	3.67161	1.27142	1.38646	1.02949	1.02044	-1.03638	1.14822	4.15091	2.2745	2.62094	2.7459	2.31642	2.30369	2.22295	2.4739	4.15091	2.2745	2.62094	2.7459	2.31642	2.30369	2.22295	2.4739	17.6995	3.48375	4.94287	5.47248	3.98433	3.36041	3.9648	4.07775	773	153	251	241	192	149	136	163
mct-6	WBGene00015676	MonoCarboxylate Transporter family	3.67146	-1.08801	-1.23035	-1.28583	-1.0429	-1.27224	-1.27881	6.37373	4.49738	4.37569	4.1983	4.13468	4.43678	4.15	4.14257	6.37373	4.49738	4.37569	4.1983	4.13468	4.43678	4.15	4.14257	56.4755	21.5588	19.7942	17.4351	16.8375	20.1036	17.4387	15.4875	4681	1791	1904	1454	1543	1693	1134	1173
R05A10.2	WBGene00011019	Uncharacterized protein	3.66834	1.06411	1.33546	2.13789	1.22143	1.60009	1.13956	3.14713	1.272	1.36164	1.68934	2.36819	1.56058	1.95015	1.46048	3.14713	1.272	1.36164	1.68934	2.36819	1.56058	1.95015	1.46048	10.1671	1.27424	1.47717	2.12574	4.17659	1.6626	3.10373	1.54903	230	29	39	49	105	39	55	32
R102.4	WBGene00011291	Uncharacterized protein	3.65969	1.08924	1.10673	-1.31108	-1.1099	-1.12932	-1.15171	6.0968	4.22508	4.3484	4.37138	3.83432	4.07465	4.04963	4.02131	6.0968	4.22508	4.3484	4.37138	3.83432	4.07465	4.04963	4.02131	47.1603	17.6788	19.4741	19.9576	13.5491	15.0863	16.2057	14.0138	2575	948	1229	1047	812	838	678	697
Y71F9B.1	WBGene00022125	Uncharacterized protein	3.65235	1.33732	1.18154	1.04749	-1.1757	1.11287	-1.07009	4.72578	2.85696	3.2763	3.09763	2.9239	2.62343	3.01125	2.75923	4.72578	2.85696	3.2763	3.09763	2.9239	2.62343	3.01125	2.75923	23.2884	5.85789	8.51804	7.26832	6.59484	4.47102	7.46721	5.14782	455	115	193	143	143	89	115	92
Y39B6A.30	WBGene00012689	Uncharacterized protein	3.6437	1.03159	-1.00955	-1.02867	-1.01802	-1.03139	1.02235	1.92251	0.0571067	0.101976	0.0433917	0.0163199	0.0313367	0.0125183	0.0889967	1.92251	0.0571067	0.101976	0.0433917	0.0163199	0.0313367	0.0125183	0.0889967	4.16301	0.037729	0.084057	0.030394	0.009128	0.018818	0.012997	0.053127	818	8	20	6	2	4	2	10
mnr-1	WBGene00012184	MeNoRin (dendritic branching protein)	3.63823	1.05243	1.08439	1.00396	1.03268	1.13347	-1.01295	4.36979	2.50655	2.58027	2.62343	2.51226	2.55294	2.68729	2.48798	4.36979	2.50655	2.58027	2.62343	2.51226	2.55294	2.68729	2.48798	19.8099	4.31421	4.79798	4.94391	4.69867	4.18424	5.80728	4.13444	1466	320	410	368	385	315	334	280
F10E9.2	WBGene00017354	Uncharacterized protein	3.63519	-1.03877	1.19933	1.05493	1.16634	-1.1597	1.19213	2.3156	0.453566	0.398683	0.715799	0.530716	0.675552	0.239817	0.707108	2.3156	0.453566	0.398683	0.715799	0.530716	0.675552	0.239817	0.707108	5.77346	0.324531	0.323617	0.616864	0.443631	0.52446	0.223019	0.547666	231	14	16	25	20	22	7	20
asp-1	WBGene00000214	ASpartyl Protease	3.63353	1.12871	1.02319	-1.94052	1.73708	2.67764	-1.19712	10.4282	8.56684	8.74152	8.59992	7.6104	9.3635	9.9878	8.30727	10.4282	8.56684	8.74152	8.59992	7.6104	9.3635	9.9878	8.30727	2009.97	376.902	431.57	376.477	203.306	613.713	945.047	315.623	111151	20885	27690	20941	12428	34474	40974	15944
iff-2	WBGene00002065	Eukaryotic translation initiation factor 5A-2	3.63193	1.36646	1.17978	1.14494	1.23533	1.38733	1.15309	8.48465	6.62392	7.07436	6.86243	6.81919	6.92882	7.09623	6.82942	8.48465	6.62392	7.07436	6.86243	6.81919	6.92882	7.09623	6.82942	407.819	100.455	137.402	121.447	123.015	126.697	140.221	117.929	9203	2272	3598	2757	3069	2905	2481	2431
C14A4.6	WBGene00007557	Uncharacterized protein	3.62989	1.21869	1.28878	1.37812	1.12031	1.36725	1.29435	4.50416	2.64424	2.92957	3.01024	3.10694	2.80814	3.09551	3.01647	4.50416	2.64424	2.92957	3.01024	3.10694	2.80814	3.09551	3.01647	21.1832	4.87749	6.30068	6.84779	7.68777	5.24914	8.00666	6.32895	470	109	162	153	189	119	140	129
D1086.7	WBGene00008394	Uncharacterized protein	3.62237	1.76486	1.34309	1.41679	1.40687	2.02435	1.29671	6.99151	5.13458	5.95413	5.56013	5.63721	5.62707	6.15204	5.50944	6.99151	5.13458	5.95413	5.56013	5.63721	5.62707	6.15204	5.50944	91.7707	34.9184	62.3916	48.2126	52.985	50.502	74.0987	45.86	2774	1058	2189	1466	1771	1551	1757	1267
nlp-10	WBGene00003748	Neuropeptide-Like Protein	3.62153	1.41804	-1.15057	1.56145	-1.04061	1.19735	1.03723	3.89553	2.03893	2.54283	1.83658	2.68182	1.9815	2.29877	2.09166	3.89553	2.03893	2.54283	1.83658	2.68182	1.9815	2.29877	2.09166	15.3845	2.77353	4.63619	2.46539	5.36792	2.50379	4.25762	2.89142	283	52	99	46	110	47	62	49
kmo-2	WBGene00011088	Kynurenine 3-MonoOxygenase	3.62099	1.42375	1.01923	-1.09051	-1.13665	1.12854	1.07368	2.30269	0.446311	0.956007	0.473793	0.321311	0.261529	0.620771	0.548881	2.30269	0.446311	0.956007	0.473793	0.321311	0.261529	0.620771	0.548881	5.70924	0.31799	0.901371	0.381255	0.260258	0.176173	0.631882	0.415488	329	20	62	24	18	12	31	24
acox-1.4	WBGene00008567	Acyl-coenzyme A oxidase	3.61586	-1.2312	-1.15172	-1.72629	-1.7388	-1.82143	-1.28007	5.63415	3.77981	3.47974	3.57602	2.99213	2.98172	2.91474	3.42359	5.63415	3.77981	3.47974	3.57602	2.99213	2.98172	2.91474	3.42359	36.1504	12.7355	9.92441	10.7555	7.01173	6.07864	7.02292	8.63728	3339	1179	1064	1000	716	571	509	729
C27D6.12	WBGene00044389	Uncharacterized protein	3.60526	2.77243	1.66196	1.88226	1.96806	2.21126	2.02045	3.91654	2.06644	3.53759	2.79933	2.97891	3.04322	3.21131	3.08112	3.91654	2.06644	3.53759	2.79933	2.97891	3.04322	3.21131	3.08112	15.5785	2.83634	10.3093	5.7216	6.91575	6.37	8.75471	6.60083	168	32	129	63	83	71	61	65
mlt-7	WBGene00022743	Peroxidase mlt-7 light chain	3.60101	1.78741	1.74443	1.33147	1.66271	1.81682	1.26069	3.43901	1.59061	2.42847	2.39336	2.00363	2.32414	2.45202	1.92482	3.43901	1.59061	2.42847	2.39336	2.00363	2.32414	2.45202	1.92482	11.9696	1.78155	4.1569	4.0489	3.01679	3.41622	4.85204	2.45736	1209	181	488	412	337	351	385	227
W06F12.3	WBGene00012307	Uncharacterized protein	3.59898	1.05718	1.08891	1.086	1.13473	1.06148	1.00681	2.01441	0.166826	0.247049	0.289715	0.285853	0.349172	0.252904	0.176617	2.01441	0.166826	0.247049	0.289715	0.285853	0.349172	0.252904	0.176617	4.51292	0.112299	0.193974	0.223749	0.231615	0.243434	0.235408	0.114802	201	6	10	10	12	11	9	5
ZK669.3	WBGene00014053	GILT-like protein ZK669.3	3.59841	-1.37139	-1.23203	1.22085	-1.50721	1.25291	-1.17618	4.86245	3.01509	2.55944	2.71405	3.30298	2.42321	3.34037	2.78098	4.86245	3.01509	2.55944	2.71405	3.30298	2.42321	3.34037	2.78098	24.8604	6.76591	4.71965	5.29083	8.91433	3.72251	9.70939	5.2651	759	207	168	163	301	116	233	147
gbh-2	WBGene00001523	Gamma Butyrobetaine Hydroxylase	3.58668	1.66876	1.79789	1.25357	-1.05346	1.81689	1.45799	5.29641	3.45376	4.19254	4.30007	3.77981	3.37863	4.31523	3.99775	5.29641	3.45376	4.19254	4.30007	3.77981	3.37863	4.31523	3.99775	30.2192	9.83414	17.2578	18.8406	13.0004	8.52471	19.7466	13.8215	1726	563	1144	1083	821	495	885	722
npa-1	WBGene00003786	Nematode Polyprotein Allergen related	3.584	1.34749	1.55687	1.08379	-1.66371	1.41463	1.52198	7.98361	6.14204	6.57232	6.78069	6.25813	5.40763	6.64247	6.74799	7.98361	6.14204	6.57232	6.78069	6.25813	5.40763	6.64247	6.74799	243.365	71.772	97.0915	114.382	82.9866	42.4701	104.111	111.484	29464	8858	13373	13641	10638	5443	9899	11608
T19D12.1	WBGene00020576	Uncharacterized protein	3.57931	1.29295	1.40266	-1.01924	1.46095	1.70114	-1.07847	2.96253	1.12285	1.49351	1.61101	1.09535	1.66975	1.88935	1.01386	2.96253	1.12285	1.49351	1.61101	1.09535	1.66975	1.88935	1.01386	9.22957	1.06415	1.71714	1.95986	1.13897	1.85402	2.94234	0.900299	2372	275	512	507	324	484	593	212
gst-42	WBGene00001790	Probable maleylacetoacetate isomerase	3.57827	1.12663	-1.04166	-1.28827	-1.26863	-1.10212	-1.03007	5.38384	3.54458	3.71658	3.48569	3.17914	3.20131	3.4043	3.50183	5.38384	3.54458	3.71658	3.48569	3.17914	3.20131	3.4043	3.50183	31.6984	10.6861	11.933	10.0113	8.07808	7.41526	10.224	9.18544	950	321	415	302	268	226	241	252
Y116A8C.33	WBGene00013809	Uncharacterized protein	3.57737	1.09541	1.18971	1.04936	1.03811	1.16542	-1.0027	2.15017	0.311273	0.442743	0.56188	0.380777	0.365232	0.532118	0.307381	2.15017	0.311273	0.442743	0.56188	0.380777	0.365232	0.532118	0.307381	5.05737	0.220771	0.36508	0.463615	0.317191	0.257727	0.526417	0.208881	472	22	40	43	35	27	41	19
lst-5	WBGene00016890	Lateral Signaling Target	3.57691	-1.12255	1.08008	-1.16059	-1.38279	-1.25714	-1.126	3.32677	1.48806	1.32128	1.5992	1.2732	1.02047	1.15791	1.31686	3.32677	1.48806	1.32128	1.5992	1.2732	1.02047	1.15791	1.31686	11.2403	1.60498	1.41581	1.93841	1.39245	0.881085	1.36226	1.29859	544	78	80	95	75	44	52	58
Y53C10A.10	WBGene00013138	Uncharacterized protein	3.57595	-1.05388	1.04627	-1.03625	-1.06293	-1.04089	-1.02818	1.94586	0.107538	0.0318208	0.172789	0.0561667	0.0194963	0.0497257	0.0674506	1.94586	0.107538	0.0318208	0.172789	0.0561667	0.0194963	0.0497257	0.0674506	4.25077	0.068621	0.023769	0.127946	0.037216	0.009049	0.046898	0.040251	925	15	6	29	9	2	9	9
vha-20	WBGene00010993	Vacuolar H ATPase	3.57073	1.30353	1.30655	-1.11797	1.06822	1.15416	-1.13137	7.58395	5.74773	6.13016	6.1335	5.58685	5.84294	5.95457	5.56966	7.58395	5.74773	6.13016	6.1335	5.58685	5.84294	5.95457	5.56966	166.949	54.4673	70.749	73.3991	51.1203	58.8746	64.2562	47.6253	7558	2471	3716	3343	2559	2708	2281	1970
F35A5.1	WBGene00018024	Uncharacterized protein	3.56973	-1.08554	-1.00535	-1.08309	-1.16812	-1.0466	-1.05228	2.7208	0.884986	0.766568	0.877291	0.769828	0.660795	0.819277	0.811466	2.7208	0.884986	0.766568	0.877291	0.769828	0.660795	0.819277	0.811466	7.8585	0.754996	0.684012	0.803647	0.685928	0.511963	0.862179	0.661267	2531	244	256	261	245	168	218	195
Y75B8A.23	WBGene00013556	Uncharacterized protein	3.56068	1.0173	1.14662	-1.64222	-1.38473	-1.29518	1.42939	3.17376	1.3416	1.36635	1.53899	0.625959	0.872001	0.968456	1.85701	3.17376	1.3416	1.36635	1.53899	0.625959	0.872001	0.968456	1.85701	10.3107	1.3845	1.48726	1.81628	0.539563	0.729528	1.06709	2.3129	125	17	21	23	8	9	11	26
nac-3	WBGene00003519	Sodium-dependent high-affinity dicarboxylate transporter 3	3.56039	1.10718	1.19204	1.00889	1.07661	-1.48037	-1.27466	3.71756	1.88552	2.03241	2.13895	1.89829	1.99201	1.31956	1.53541	3.71756	1.88552	2.03241	2.13895	1.89829	1.99201	1.31956	1.53541	13.9567	2.38833	2.92427	3.22192	2.69805	2.52236	1.66899	1.69631	962	166	232	222	208	180	93	107
F55B11.3	WBGene00010085	Uncharacterized protein	3.5582	1.0154	-1.02476	-1.2259	-1.0374	-1.06765	-1.45229	7.72838	5.89723	5.91928	5.86194	5.60339	5.84427	5.8028	5.3589	7.72838	5.89723	5.91928	5.86194	5.60339	5.84427	5.8028	5.3589	190.647	60.6176	61.015	59.9392	51.6742	58.9284	57.8932	40.6012	6161	1963	2288	1949	1846	1935	1467	1199
irg-7	WBGene00018237	Infection Response Gene	3.55699	-1.04246	1.11352	-1.74703	1.06572	1.04184	-1.61344	7.16446	5.3338	5.27381	5.48892	4.5289	5.42563	5.39293	4.64366	7.16446	5.3338	5.27381	5.48892	4.5289	5.42563	5.39293	4.64366	108.627	39.917	38.1326	45.7822	22.7684	43.2646	43.2808	23.0001	33551	12354	13664	14221	7771	13574	10479	6490
F35C5.12	WBGene00009400	Uncharacterized protein	3.55547	1.1079	1.07841	1.24741	1.0798	-1.18788	1.06156	2.35325	0.523215	0.671038	0.632121	0.842152	0.633985	0.274825	0.609401	2.35325	0.523215	0.671038	0.632121	0.842152	0.633985	0.274825	0.609401	5.94694	0.382055	0.591426	0.527514	0.768357	0.484052	0.256313	0.462316	106	7	13	10	16	9	4	8
gpx-1	WBGene00009165	Glutathione peroxidase 1	3.54899	1.40384	1.66701	2.6901	2.03486	2.21389	1.92484	5.86617	4.03876	4.52813	4.77602	5.46641	5.06369	5.18534	4.9835	5.86617	4.03876	4.52813	4.77602	5.46641	5.06369	5.18534	4.9835	41.1532	15.4734	22.2142	27.1404	46.4293	32.5119	37.4965	29.9154	941	355	589	624	1173	755	672	625
cdr-7	WBGene00010472	CaDmium Responsive	3.54887	1.62217	1.47133	1.59071	1.46659	1.41072	1.11381	4.09861	2.27125	2.96918	2.82837	2.94093	2.82372	2.76768	2.42676	4.09861	2.27125	2.96918	2.82837	2.94093	2.82372	2.76768	2.42676	17.2851	3.47073	6.48407	5.86133	6.71945	5.29222	6.20439	3.86381	678	137	295	232	292	212	191	140
F13H6.3	WBGene00017431	Esterase CM06B1	3.54231	1.6145	1.75167	1.84913	1.37371	2.13583	1.86719	5.33566	3.51097	4.20206	4.31969	4.39781	3.96904	4.60577	4.41183	5.33566	3.51097	4.20206	4.31969	4.39781	3.96904	4.60577	4.41183	30.8517	10.4122	17.3951	19.115	20.5418	13.8219	24.5917	19.1609	2386	807	1561	1487	1756	1086	1491	1354
F58G6.9	WBGene00044107	Uncharacterized protein	3.53602	8.21137	9.98891	7.0948	5.97538	9.85456	5.89843	3.96193	2.1398	5.17742	5.46013	4.96656	4.71883	5.44059	4.70013	3.96193	2.1398	5.17742	5.46013	4.96656	4.71883	5.44059	4.70013	15.9885	3.0496	35.6877	44.9224	32.1039	24.9001	44.5099	24.112	325	62	840	915	727	512	703	441
ztf-26	WBGene00010137	Zinc finger putative Transcription Factor family	3.53527	1.31098	1.21961	1.32394	-1.06158	1.33218	1.24977	3.82545	2.00363	2.39427	2.29005	2.40847	1.91741	2.41742	2.32529	3.82545	2.00363	2.39427	2.29005	2.40847	1.91741	2.41742	2.32529	14.797	2.6912	4.02873	3.69383	4.33822	2.37255	4.72974	3.55177	615	112	194	155	200	100	155	136
gly-8	WBGene00001633	Probable N-acetylgalactosaminyltransferase 8	3.52773	1.09036	-1.11117	1.12816	-1.34139	-1.44153	-1.19877	5.52756	3.70882	3.83362	3.55675	3.88279	3.28509	3.18123	3.44727	5.52756	3.70882	3.83362	3.55675	3.88279	3.28509	3.18123	3.44727	34.2191	12.0988	13.1823	10.5948	14.0169	7.88607	8.61159	8.76639	2012	713	900	627	911	471	397	471
math-27	WBGene00018101	MATH (meprin-associated Traf homology) domain containing	3.52608	1.19943	1.45382	1.54056	-1.02264	2.04763	1.62777	6.33748	4.51942	4.78177	5.05927	5.14287	4.48711	5.55337	5.22232	6.33748	4.51942	4.78177	5.05927	5.14287	4.48711	5.55337	5.22232	55.0386	21.8179	26.7865	33.1731	36.8047	20.9098	48.4067	36.246	2064	835	1146	1176	1548	788	1394	1171
mak-1	WBGene00010681	MAP kinase-activated protein kinase mak-1	3.51375	1.1084	1.09763	1.17266	-1.0533	1.02983	1.13884	7.4904	5.67739	5.82587	5.81178	5.90718	5.60248	5.7198	5.86495	7.4904	5.67739	5.82587	5.81178	5.90718	5.60248	5.7198	5.86495	152.632	51.3577	57.0982	57.7468	64.265	49.3541	54.5346	59.6284	8404	3378	4310	4123	4695	3536	3038	3611
T25B9.1	WBGene00012007	Uncharacterized protein	3.50451	1.12609	-1.01951	-1.44802	-1.1141	-1.02635	-1.49398	3.28074	1.47152	1.64285	1.44365	0.937448	1.31565	1.434	0.892364	3.28074	1.47152	1.64285	1.44365	0.937448	1.31565	1.434	0.892364	10.9653	1.57932	2.01178	1.63059	0.892314	1.27504	1.8453	0.758344	644	93	137	97	58	76	85	41
F35E2.9	WBGene00009416	Uncharacterized protein	3.50225	1.00162	-1.04255	-1.10515	-1.00824	-1.40611	1.21155	2.76456	0.956275	0.958605	0.896164	0.812035	0.944442	0.464564	1.23312	2.76456	0.956275	0.958605	0.896164	0.812035	0.944442	0.464564	1.23312	8.09949	0.84695	0.904707	0.819828	0.731908	0.799844	0.454289	1.18325	727	77	95	74	73	73	32	97
fgt-1	WBGene00019207	Facilitated glucose transporter protein 1	3.50203	1.25258	1.21051	1.12248	1.24179	1.62839	1.22701	6.6849	4.87671	5.20161	5.15232	5.0434	5.18913	5.58015	5.17186	6.6849	4.87671	5.20161	5.15232	5.0434	5.18913	5.58015	5.17186	70.9459	28.4816	36.252	36.0002	34.1597	35.8734	49.3206	34.756	4878	1960	2889	2492	2593	2503	2659	2181
C32D5.6	WBGene00016314	Uncharacterized protein	3.49908	1.06805	1.22871	1.06118	1.12206	1.14973	-1.28163	4.29417	2.48719	2.58217	2.78433	2.57286	2.65334	2.68849	2.12922	4.29417	2.48719	2.58217	2.78433	2.57286	2.65334	2.68849	2.12922	19.1156	4.22536	4.81159	5.65341	4.90976	4.58983	5.8192	2.98656	1542	342	451	459	438	377	368	221
daf-22	WBGene00013284	Non-specific lipid-transfer protein-like 2	3.49808	-1.23247	1.00715	1.7744	-1.29028	1.19374	1.1803	6.17561	4.36904	4.06749	4.37933	5.19637	4.00136	4.62453	4.6082	6.17561	4.36904	4.06749	4.37933	5.19637	4.00136	4.62453	4.6082	49.4021	19.635	15.6061	20.1094	38.1186	14.2421	24.9418	22.345	2843	1132	1042	1164	2424	833	1125	1175
ttr-35	WBGene00017688	TransThyretin-Related family domain	3.49485	-1.18968	-1.20349	-1.85112	-1.50888	-2.04034	-1.25403	6.65675	4.85152	4.60094	4.58429	3.96312	4.25805	3.82271	4.52495	6.65675	4.85152	4.60094	4.58429	3.96312	4.25805	3.82271	4.52495	69.4808	28.0804	23.5468	23.4171	14.8503	17.4702	13.7997	20.8568	1414	573	556	480	334	361	221	388
dhs-7	WBGene00000971	DeHydrogenases, Short chain	3.4923	2.0794	2.53469	2.53748	1.36911	2.32613	3.34839	3.63673	1.83255	2.88872	3.17436	3.17595	2.28578	3.05048	3.57602	3.63673	1.83255	2.88872	3.17436	3.17595	2.28578	3.05048	3.57602	13.4059	2.27063	6.06302	7.71086	8.05885	3.3169	7.77457	9.76281	617	105	324	357	410	155	281	410
ZC416.6	WBGene00022610	Uncharacterized protein	3.48566	1.44288	1.46901	-1.2887	1.29847	1.03271	-1.14812	5.8028	4.00136	4.53032	4.5562	3.63545	4.37818	4.04781	3.80209	5.8028	4.00136	4.53032	4.5562	3.63545	4.37818	4.04781	3.80209	39.8111	14.8982	22.2404	22.8765	11.5248	19.2318	16.1924	11.7532	3470	1301	2246	2006	1110	1702	1105	936
gln-3	WBGene00001604	Glutamine synthetase	3.48394	-1.23825	-1.38508	-1.21537	-1.65882	1.0173	-1.15146	8.59153	6.79081	6.48251	6.32083	6.50941	6.06065	6.81556	6.58734	8.59153	6.79081	6.48251	6.32083	6.50941	6.06065	6.81556	6.58734	450.19	112.321	91.8194	83.4619	98.8801	69.0062	117.313	100.383	18516	4654	4377	3477	4499	2893	3804	3786
Y67A10A.10	WBGene00013459	Uncharacterized protein	3.48127	1.42139	1.71618	1.58794	1.07203	1.077	1.19444	2.91515	1.11554	1.62283	1.89473	1.78269	1.21589	1.22255	1.37187	2.91515	1.11554	1.62283	1.89473	1.78269	1.21589	1.22255	1.37187	8.97143	1.05218	1.97199	2.61867	2.41239	1.12588	1.47271	1.39535	214	26	55	63	64	28	28	31
ZK622.5	WBGene00044667	Uncharacterized protein	3.48075	1.40584	1.4011	1.08656	-1.16157	-1.01684	1.0055	2.94509	1.14569	1.63713	1.63226	1.26546	0.929621	1.1216	1.1536	2.94509	1.14569	1.63713	1.63226	1.26546	0.929621	1.1216	1.1536	9.12544	1.09739	2.00367	2.00847	1.38377	0.781599	1.30591	1.07194	233	29	60	52	39	21	27	25
C39D10.3	WBGene00016531	Uncharacterized protein	3.47805	1.15426	-1.07984	1.0759	-1.37808	-1.2306	-1.008	3.32762	1.52934	1.73631	1.41853	1.63488	1.06669	1.22998	1.51785	3.32762	1.52934	1.73631	1.41853	1.63488	1.06669	1.22998	1.51785	11.2448	1.67308	2.21007	1.58227	2.06203	0.931251	1.4829	1.66528	395	66	97	56	80	37	43	67
ZK1240.9	WBGene00022873	Uncharacterized protein	3.47493	1.12147	1.39215	-1.059	-1.11292	-1.0438	1.10864	2.60902	0.812035	0.97742	1.28935	0.729338	0.657683	0.750192	0.960823	2.60902	0.812035	0.97742	1.28935	0.729338	0.657683	0.750192	0.960823	7.22659	0.676682	0.927729	1.35346	0.643337	0.509186	0.782106	0.835493	219	21	33	42	22	16	19	24
K08D8.6	WBGene00010660	Uncharacterized protein	3.47099	-1.26619	-1.00116	-1.40428	1.16439	-1.28138	-1.2609	5.7396	3.94425	3.60376	3.94258	3.45441	4.16382	3.58655	3.60979	5.7396	3.94425	3.60376	3.94258	3.45441	4.16382	3.58655	3.60979	38.434	14.2683	10.9943	14.3662	10.0435	16.1886	11.6459	10.0526	2631	975	870	986	758	1126	624	629
acs-1	WBGene00018488	fatty Acid CoA Synthetase family	3.46987	1.01362	1.27402	1.20455	1.13281	-1.10364	1.11466	7.74068	5.9458	5.96531	6.29519	6.21429	6.12571	5.80353	6.1024	7.74068	5.9458	5.96531	6.29519	6.21429	6.12571	5.80353	6.1024	192.394	62.8768	62.9567	82.1718	80.6236	72.5572	57.932	70.7728	15618	5117	5937	6708	7231	5990	3689	5253
fipr-2	WBGene00009097	FIP (Fungus-Induced Protein) Related	3.46663	1.40463	1.52754	1.54066	1.50414	1.47297	1.48166	4.34175	2.54821	3.03841	3.15942	3.17176	3.13715	3.10694	3.11543	4.34175	2.54821	3.03841	3.15942	3.17176	3.13715	3.10694	3.11543	19.5094	4.48441	6.90753	7.63214	8.0385	6.99038	8.08654	6.83104	207	49	87	82	95	75	68	67
F43H9.4	WBGene00018400	Uncharacterized protein	3.46479	7.6315	9.57784	7.83773	2.325	7.01454	9.01068	4.90055	3.10778	6.03974	6.36748	6.07821	4.32501	5.91813	6.27941	4.90055	3.10778	6.03974	6.36748	6.07821	4.32501	5.91813	6.27941	25.4243	7.32866	66.4034	86.5595	73.4963	18.3276	62.6578	80.4884	1056	305	3198	3614	3373	773	2040	3052
cor-1	WBGene00000768	Coronin-like protein cor-1	3.46257	-1.04785	-1.12053	-1.05189	-1.35491	-1.17922	-1.14504	3.33182	1.53998	1.47254	1.37579	1.46699	1.10178	1.30214	1.34458	3.33182	1.53998	1.47254	1.37579	1.46699	1.10178	1.30214	1.34458	11.2524	1.68934	1.67345	1.50176	1.74451	0.977022	1.63372	1.35028	952	144	165	126	162	85	106	105
alh-5	WBGene00000111	Aldehyde dehydrogenase	3.46234	1.41139	1.5462	1.44543	-1.04263	3.23662	1.06548	3.46483	1.67308	2.1702	2.30181	2.20458	1.61285	3.36757	1.76459	3.46483	1.67308	2.1702	2.30181	2.20458	1.61285	3.36757	1.76459	12.1184	1.95045	3.30832	3.7182	3.6389	1.74654	9.91866	2.13743	740	120	235	229	246	109	475	120
C53A3.2	WBGene00016892	Uncharacterized protein	3.46006	-1.00085	1.38632	1.48701	-1.25324	-1.48621	1.1059	6.83471	5.04391	5.04269	5.51517	5.61633	4.71825	4.47228	5.18913	6.83471	5.04391	5.04269	5.51517	5.61633	4.71825	4.47228	5.18913	80.4405	32.7892	31.9961	46.6004	52.1904	24.8966	22.2763	35.294	3922	1602	1810	2286	2813	1233	852	1572
W05B5.1	WBGene00012274	Uncharacterized protein	3.45657	1.0833	-1.02513	1.06534	-1.03311	1.06226	1.12536	5.7089	3.91956	4.03499	3.88375	4.01086	3.87256	4.00669	4.08994	5.7089	3.91956	4.03499	3.88375	4.01086	3.87256	4.00669	4.08994	37.79	14.0503	15.2299	13.6109	15.3076	12.8013	15.7854	14.8245	826	295	385	286	367	276	260	289
grsp-2	WBGene00012118	Glycine Rich Secreted Protein	3.45597	3.10595	2.63173	2.86023	1.94654	1.84582	2.6571	4.49483	2.70574	4.34078	4.10175	4.22187	3.66666	3.59001	4.1156	4.49483	2.70574	4.34078	4.10175	4.22187	3.66666	3.59001	4.1156	21.1283	5.15532	19.3927	16.1972	17.9661	10.7873	11.6739	15.192	849	208	886	634	788	430	368	543
F25H5.7	WBGene00009129	Protein-tyrosine-phosphatase	3.45401	-1.12442	1.02851	-1.00713	-1.14875	-1.07574	-1.18093	2.07953	0.291264	0.122077	0.331826	0.281013	0.0911943	0.185937	0.0513441	2.07953	0.291264	0.122077	0.331826	0.281013	0.0911943	0.185937	0.0513441	4.767	0.204287	0.099447	0.256942	0.227697	0.057578	0.174573	0.032012	327	15	8	18	18	4	10	2
F09B12.3	WBGene00008607	Putative phospholipase B-like 2	3.44468	-1.22223	1.04188	-1.80062	-1.42306	-1.93633	-1.24549	6.5439	4.75953	4.47002	4.81871	3.91103	4.25053	3.8062	4.44281	6.5439	4.75953	4.47002	4.81871	3.91103	4.25053	3.8062	4.44281	63.7873	26.484	21.2787	28.0161	14.2876	17.3118	13.6169	19.5863	5181	2156	2005	2289	1283	1429	867	1453
Y49E10.18	WBGene00013037	Uncharacterized protein	3.44442	-1.47395	-1.53264	-1.93014	-1.03752	1.133	-1.49916	5.24343	3.45917	2.89948	2.84315	2.51046	3.40603	3.63932	2.87502	5.24343	3.45917	2.89948	2.84315	2.51046	3.40603	3.63932	2.87502	29.5145	9.88813	6.12834	5.96944	4.69419	8.74502	12.1302	5.64577	1382	464	333	282	243	416	446	242
Y73C8B.3	WBGene00022260	Uncharacterized protein	3.4439	-1.03367	1.37592	1.25069	1.26663	1.09631	1.10921	4.90912	3.12507	3.0773	3.58547	3.44779	3.46607	3.25773	3.27461	4.90912	3.12507	3.0773	3.58547	3.44779	3.46607	3.25773	3.27461	25.5309	7.42102	7.171	10.789	9.97181	9.124	9.12697	7.77316	1171	341	382	498	506	425	328	326
F17H10.1	WBGene00008925	Uncharacterized protein	3.44026	-1.43393	-1.39213	-1.31468	-1.4595	-1.91967	-1.64108	6.11868	4.33617	3.8162	3.85888	3.94145	3.79069	3.39531	3.62152	6.11868	4.33617	3.8162	3.85888	3.94145	3.79069	3.39531	3.62152	47.728	19.2293	12.9982	13.3666	14.6149	11.943	10.1406	10.1545	3371	1361	1066	950	1141	857	562	656
Y116A8C.38	WBGene00013811	Tyrosine-protein kinase	3.43959	1.03517	1.12866	1.07998	1.11847	1.03574	-1.0135	1.84497	0.0627355	0.112603	0.237346	0.173736	0.224261	0.113393	0.0433917	1.84497	0.0627355	0.112603	0.237346	0.173736	0.224261	0.113393	0.0433917	3.88636	0.040631	0.093345	0.182016	0.135051	0.153645	0.103857	0.026182	287	3	8	14	11	12	7	2
R07E5.4	WBGene00011112	Uncharacterized protein	3.42881	1.58941	1.40301	-1.24868	1.718	-1.64933	-1.41372	3.64355	1.86584	2.53434	2.35437	1.54544	2.64658	1.14396	1.36635	3.64355	1.86584	2.53434	2.35437	1.54544	2.64658	1.14396	1.36635	13.4682	2.34889	4.59669	3.91741	1.89026	4.55598	1.34197	1.38751	351	62	139	103	55	121	28	34
F10D11.5	WBGene00008651	Uncharacterized protein	3.42413	1.1684	1.0424	1.04436	1.05461	-1.02211	1.05488	1.96167	0.185937	0.410473	0.245843	0.248561	0.262643	0.154379	0.26302	1.96167	0.185937	0.410473	0.245843	0.248561	0.262643	0.154379	0.26302	4.32421	0.12794	0.331488	0.191059	0.196701	0.176691	0.147162	0.182441	338	11	30	15	17	15	9	14
dct-11	WBGene00021060	DAF-16/FOXO Controlled, germline Tumor affecting	3.42409	-1.37585	-1.35478	-1.42382	-1.36962	-1.26106	-1.31374	6.56566	4.78994	4.32962	4.35188	4.28017	4.33617	4.4553	4.39626	6.56566	4.78994	4.32962	4.35188	4.28017	4.33617	4.4553	4.39626	64.7291	26.9851	19.2026	19.6922	18.8196	18.4294	21.9189	18.9438	2137	893	736	654	687	618	568	572
tatn-1	WBGene00009628	Tyrosine AminoTraNsferase	3.42088	1.34479	1.26472	2.35794	-1.03532	1.45926	2.50751	4.81139	3.03702	3.4644	3.37584	4.27455	2.98695	3.58226	4.36328	4.81139	3.03702	3.4644	3.37584	4.27455	2.98695	3.58226	4.36328	24.272	6.91172	9.78977	9.18988	18.7603	6.09791	11.6085	18.5069	1573	449	736	599	1344	402	590	1096
F46H5.7	WBGene00018522	Uncharacterized protein	3.41898	-1.28987	-1.18233	-1.12359	-1.28935	-1.0888	-1.16329	6.95266	5.17909	4.81187	4.93746	5.01098	4.81245	5.05635	4.96087	6.95266	5.17909	4.81187	4.93746	5.01098	4.81245	5.05635	4.96087	88.6628	36.044	27.3043	30.6591	33.2683	26.6618	34.1948	29.4361	7077	2884	2527	2463	2920	2159	2139	2149
Y71G12B.30	WBGene00044347	Serine/threonine-protein phosphatase	3.41881	1.5942	1.34065	1.32056	1.32655	-1.02952	1.89381	3.21859	1.4451	2.11793	1.86803	1.84625	1.85277	1.40313	2.36639	3.21859	1.4451	2.11793	1.86803	1.84625	1.85277	1.40313	2.36639	10.5751	1.54343	3.1695	2.54312	2.5692	2.24971	1.78829	3.67738	378	56	129	95	98	83	51	111
T19D2.1	WBGene00020567	Uncharacterized protein	3.41747	-1.01006	-1.05167	-1.00859	1.04496	1.0073	-1.0471	1.86647	0.0935473	0.0791008	0.0208668	0.0812006	0.156994	0.104041	0.0271443	1.86647	0.0935473	0.0791008	0.0208668	0.0812006	0.156994	0.104041	0.0271443	3.95586	0.060713	0.065757	0.01517	0.064397	0.103088	0.096153	0.016704	519	8	10	2	10	14	10	2
acbp-6	WBGene00012457	Acyl-Coenzyme A Binding Protein	3.40056	1.6208	1.40988	1.93475	2.10737	1.04641	1.44534	4.23804	2.47226	3.16897	2.96784	3.42441	3.5477	2.53771	3.00367	4.23804	2.47226	3.16897	2.96784	3.42441	3.5477	2.53771	3.00367	18.4269	4.17612	7.75321	6.60878	9.81745	9.82571	5.16141	6.27728	298	68	146	108	176	162	66	93
tomm-22	WBGene00021133	Mitochondrial import receptor subunit TOM22 homolog	3.39962	1.08288	1.54782	1.00667	1.91748	1.92284	1.84433	7.9345	6.16913	6.284	6.79936	6.17871	7.10834	7.11237	7.05223	7.9345	6.16913	6.284	6.79936	6.17871	7.10834	7.11237	7.05223	231.112	73.1005	79.3507	116.288	78.5167	142.562	141.324	137.874	1858	1121	1409	1108	1328	1218	882	1038
lbp-6	WBGene00002258	Fatty acid-binding protein homolog 6	3.39264	-1.17148	-1.11795	-1.04212	-1.11173	1.18411	-1.15433	9.13103	7.36862	7.14028	7.20776	7.3091	7.21581	7.61242	7.16157	9.13103	7.36862	7.14028	7.20776	7.3091	7.21581	7.61242	7.16157	694.682	168.246	143.933	153.335	169.386	151.881	192.052	147.77	13160	3194	3164	2922	3547	2923	2853	2558
nhr-97	WBGene00003687	Nuclear hormone receptor family member nhr-97	3.39195	1.07234	1.26185	1.11419	1.19996	1.46394	1.21522	5.70709	3.94497	4.04573	4.28052	4.10097	4.20796	4.49483	4.22619	5.70709	3.94497	4.04573	4.28052	4.10097	4.20796	4.49483	4.22619	37.7568	14.2739	15.3542	18.5118	16.3928	16.7389	22.5765	16.6937	2315	877	1093	1141	1111	1043	1085	935
math-3	WBGene00015608	MATH (meprin-associated Traf homology) domain containing	3.3892	1.15488	1.54988	1.108	-1.00731	1.7612	1.29305	4.52813	2.76719	2.97493	3.39935	2.91515	2.75667	3.58375	3.13797	4.52813	2.76719	2.97493	3.39935	2.91515	2.75667	3.58375	3.13797	21.4363	5.41014	6.51129	9.30602	6.53311	5.03234	11.6229	7.00897	1478	365	537	617	505	356	631	458
F17C11.4	WBGene00008915	Uncharacterized protein	3.38848	-1.09793	-1.37569	-1.01301	-1.15322	-1.12595	-1.26577	5.81723	4.0566	3.92181	3.59645	4.03795	3.85093	3.88546	3.71658	5.81723	4.0566	3.92181	3.59645	4.03795	3.85093	3.88546	3.71658	40.0532	15.7649	14.0643	10.8737	15.5866	12.605	14.4344	11.0522	1399	406	426	284	471	338	293	352
him-4	WBGene00001863	High Incidence of Males (increased X chromosome loss)	3.38778	-1.17944	-1.7765	-1.07791	-1.36158	-1.51654	-2.00794	3.51796	1.75762	1.51952	0.928575	1.64938	1.31234	1.15683	0.751902	3.51796	1.75762	1.51952	0.928575	1.64938	1.31234	1.15683	0.751902	12.4825	2.10994	1.76055	0.860893	2.09179	1.27093	1.35991	0.601238	6043	518	516	506	497	362	403	322
K03H6.2	WBGene00019368	Uncharacterized protein	3.38651	-2.08961	-1.46939	-4.22747	-1.57875	-1.59477	-1.02489	5.0752	3.3154	2.25217	2.76018	1.23561	2.65662	2.64205	3.27993	5.0752	3.3154	2.25217	2.76018	1.23561	2.65662	2.64205	3.27993	27.58	8.64737	3.55764	5.52831	1.3384	4.61227	5.64331	7.7928	1306	410	194	239	70	221	208	274
drd-1	WBGene00009902	dietary restriction down regulated	3.3848	-1.3073	-1.29424	-2.55476	-1.72183	-2.66132	-3.48447	4.91439	3.15532	2.76873	2.78322	1.80214	2.37138	1.74318	1.35438	4.91439	3.15532	2.76873	2.78322	1.80214	2.37138	1.74318	1.35438	25.5622	7.60262	5.52638	5.64853	2.455	3.55601	2.50224	1.3669	950	287	243	208	103	131	74	47
W01B11.6	WBGene00020917	Uncharacterized protein	3.38413	-1.5886	-1.89668	-1.11221	-1.82615	-1.66891	-1.11088	6.95009	5.1913	4.52355	4.26783	5.03787	4.3225	4.4524	5.0396	6.95009	5.1913	4.52355	4.26783	5.03787	4.3225	4.4524	5.0396	88.1859	36.3359	22.1719	18.329	33.9362	18.2767	21.8888	31.366	1352	558	395	283	575	285	263	440
F07C3.9	WBGene00017197	Uncharacterized protein	3.3813	1.3449	1.42624	1.44399	-1.05985	1.62736	1.50886	5.71	3.95242	4.37992	4.46464	4.48249	3.86856	4.65496	4.54588	5.71	3.95242	4.37992	4.46464	4.48249	3.86856	4.65496	4.54588	37.8186	14.3332	19.8613	21.5855	21.9491	12.763	25.39	21.2009	285	109	174	164	183	98	150	146
K10D3.6	WBGene00010740	Uncharacterized protein	3.37397	1.56321	1.14546	1.81431	1.01915	1.65531	1.31597	4.11361	2.35917	3.00367	2.5551	3.21859	2.38653	3.08626	2.75529	4.11361	2.35917	3.00367	2.5551	3.21859	2.38653	3.08626	2.75529	17.4388	3.76357	6.67621	4.6486	8.34949	3.60348	7.9482	5.1256	265	58	118	71	141	56	95	72
bca-1	WBGene00000245	Beta carbonic anhydrase 1	3.37328	1.0583	1.26918	1.034	1.05005	1.09564	-1.00713	4.99048	3.23632	3.31807	3.58021	3.28456	3.30678	3.36809	3.22607	4.99048	3.23632	3.31807	3.58021	3.28456	3.30678	3.36809	3.22607	26.5315	8.124	8.82874	10.774	8.75555	8.05405	9.92484	7.45674	1002	308	387	410	366	309	294	258
col-130	WBGene00000704	COLlagen	3.37149	1.41441	1.08384	1.06567	1.02552	1.08779	1.00746	1.82934	0.0759568	0.576159	0.192111	0.167716	0.112315	0.197363	0.0866788	1.82934	0.0759568	0.576159	0.192111	0.167716	0.112315	0.197363	0.0866788	3.82056	0.047764	0.494818	0.142752	0.12968	0.070443	0.182832	0.052134	160	2	24	6	6	3	6	2
Y105E8B.9	WBGene00013693	Uncharacterized protein	3.36966	-1.26075	-1.15729	-1.20857	1.00774	-1.20343	-1.19547	3.23632	1.48372	1.14944	1.27297	1.21042	1.49484	1.21657	1.22614	3.23632	1.48372	1.14944	1.27297	1.21042	1.49484	1.21657	1.22614	10.687	1.59998	1.15868	1.32227	1.29804	1.55773	1.46196	1.17423	937	141	118	117	126	139	101	94
cnc-8	WBGene00009624	CaeNaCin (Caenorhabditis bacteriocin)	3.34796	1.11275	-1.2957	1.02367	-1.42827	-1.31235	1.06182	6.62255	4.87927	5.03339	4.50554	4.91302	4.36499	4.48711	4.9658	6.62255	4.87927	5.03339	4.50554	4.91302	4.36499	4.48711	4.9658	67.3343	28.5478	31.8537	22.1349	30.8008	19.0116	22.4727	29.5078	685	291	376	227	347	197	180	275
T25B9.4	WBGene00012010	Tyrosine-protein kinase	3.34725	1.13457	1.10406	1.15883	1.17674	1.04637	1.00122	2.05706	0.314084	0.49623	0.456901	0.52675	0.548881	0.379477	0.31585	2.05706	0.314084	0.49623	0.456901	0.52675	0.548881	0.379477	0.31585	4.67933	0.222538	0.418552	0.368205	0.441253	0.408923	0.358251	0.215512	357	17	38	29	38	32	22	16
D1022.4	WBGene00017023	Uncharacterized protein	3.34626	1.2598	1.18523	1.18996	1.08316	1.76499	1.09507	5.64739	3.90484	4.23804	4.15	4.15576	4.02009	4.7245	4.03587	5.64739	3.90484	4.23804	4.15	4.15576	4.02009	4.7245	4.03587	36.4766	13.8929	18.0057	16.9325	17.0624	14.4353	26.671	14.1911	1240	474	711	579	642	499	711	441
Y49E10.29	WBGene00045239	Uncharacterized protein	3.34594	-1.06986	-1.06549	-1.15693	1.0535	-1.14806	-1.36559	2.8189	1.07649	0.979069	0.984964	0.866178	1.15167	0.877291	0.626957	2.8189	1.07649	0.979069	0.984964	0.866178	1.15167	0.877291	0.626957	8.40725	1.00401	0.930683	0.92993	0.799499	1.03803	0.940282	0.478822	656	79	85	73	69	83	58	35
dhs-28	WBGene00000991	DeHydrogenases, Short chain	3.34368	-1.23995	-1.05847	1.32499	-1.34861	1.30038	-1.00264	7.06001	5.31858	5.00829	5.2366	5.72456	4.88711	5.69751	5.31477	7.06001	5.31858	5.00829	5.2366	5.72456	4.88711	5.69751	5.31477	98.3462	39.6216	31.4043	38.1451	56.6069	28.2911	53.6541	39.2241	5987	2417	2218	2336	3809	1750	2561	2182
pkc-2	WBGene00004033	Protein kinase C	3.34202	1.12732	1.24062	1.01803	1.07743	1.06861	1.1801	5.3462	3.60548	3.77837	3.91654	3.63125	3.71307	3.70122	3.84439	5.3462	3.60548	3.77837	3.91654	3.63125	3.71307	3.70122	3.84439	31.0248	11.1644	12.5749	14.0729	11.4851	11.2314	12.595	12.1876	2983	1085	1420	1395	1261	1113	968	1090
Y47G6A.13	WBGene00021639	Uncharacterized protein	3.33754	-1.28244	-1.06859	-1.07267	-1.17751	1.08542	-1.20802	2.20819	0.469405	0.11051	0.373699	0.368198	0.23367	0.587655	0.196766	2.20819	0.469405	0.11051	0.373699	0.368198	0.23367	0.587655	0.196766	5.2957	0.336009	0.091857	0.286896	0.304464	0.160395	0.595004	0.133392	346	22	7	19	22	11	31	8
gcst-1	WBGene00017765	Aminomethyltransferase	3.33522	-1.04617	-1.17914	-1.04415	-1.07265	-1.10331	-1.15812	7.42771	5.68992	5.6248	5.45219	5.62759	5.58874	5.54808	5.47814	7.42771	5.68992	5.6248	5.45219	5.62759	5.58874	5.54808	5.47814	142.501	51.8735	49.4864	44.5489	52.5774	48.8353	48.11	44.5737	8000	2918	3223	2516	3263	2785	2118	2286
F44F4.10	WBGene00009705	Uncharacterized protein	3.33446	1.10621	1.06735	1.17503	-1.024	1.01262	1.08747	1.89047	0.153016	0.298643	0.247049	0.385712	0.118802	0.171114	0.273987	1.89047	0.153016	0.298643	0.247049	0.385712	0.118802	0.171114	0.273987	4.05663	0.101988	0.241572	0.192391	0.323122	0.075455	0.160737	0.189961	159	5	11	8	14	4	5	7
F47B7.1	WBGene00018532	UPF0057 membrane protein F47B7.1	3.3337	-1.06617	-1.42345	-1.06749	-1.599	-1.51831	-1.06225	7.12953	5.39241	5.29997	4.88302	5.29818	4.71524	4.78994	5.30528	7.12953	5.39241	5.29997	4.88302	5.29818	4.71524	4.78994	5.30528	104.816	41.9806	38.9595	29.2923	41.2896	24.7939	28.1487	38.9916	877	352	378	247	382	211	185	298
mua-3	WBGene00003482	Transmembrane cell adhesion receptor mua-3	3.32835	1.11233	-1.06719	-1.28368	1.13352	-1.03815	-1.38381	2.83262	1.09782	1.2514	1.004	0.737534	1.27862	1.0438	0.62917	2.83262	1.09782	1.2514	1.004	0.737534	1.27862	1.0438	0.62917	8.46986	1.02737	1.31817	0.950928	0.654729	1.21634	1.17623	0.481166	3760	509	803	494	352	636	485	231
ant-1.3	WBGene00010485	Adenine Nucleotide Translocator	3.32645	-1.21232	-1.22635	-1.31981	-1.38594	-1.75648	-1.11982	4.30534	2.57136	2.29359	2.27698	2.17103	2.10049	1.75867	2.40809	4.30534	2.57136	2.29359	2.27698	2.17103	2.10049	1.75867	2.40809	19.1835	4.56121	3.70947	3.65836	3.55003	2.80442	2.54716	3.7999	840	200	189	161	172	125	88	152
F43C9.2	WBGene00018376	Uncharacterized protein	3.32467	-1.01757	-1.21401	1.11966	-1.20545	1.14336	1.06808	5.17799	3.44478	3.41965	3.16499	3.60784	3.17521	3.63806	3.5398	5.17799	3.44478	3.41965	3.16499	3.60784	3.17521	3.63806	3.5398	28.7088	9.72947	9.54358	7.65832	11.2496	7.22335	12.1145	9.50158	640	218	247	172	278	164	212	194
gas-1	WBGene00001520	Probable NADH dehydrogenase [ubiquinone] iron-sulfur protein 2, mitochondrial	3.31708	1.11688	1.03431	-1.01914	-1.06327	-1.1271	-1.06098	7.35471	5.6248	5.78427	5.67347	5.59745	5.5363	5.45219	5.53941	7.35471	5.6248	5.78427	5.67347	5.59745	5.5363	5.45219	5.53941	131.291	49.4146	55.5009	52.4938	51.4945	47.1102	44.8827	46.7608	8834	3332	4333	3553	3830	3220	2368	2874
T01D3.6	WBGene00011330	Uncharacterized protein	3.31698	-2.39036	-3.43159	-1.61906	1.05904	-3.97498	-2.32289	6.50458	4.77471	3.51748	2.99583	4.07956	4.85747	2.78376	3.55879	6.50458	4.77471	3.51748	2.99583	4.07956	4.85747	2.78376	3.55879	61.8401	26.6992	10.1631	6.76773	16.0742	27.5674	6.29942	9.65704	7899	3418	1505	870	2270	3580	631	1129
Y69A2AR.12	WBGene00022083	Uncharacterized protein	3.31364	1.07953	1.01569	-1.01463	-1.09996	1.07892	-1.01328	3.24166	1.51325	1.62364	1.53571	1.49229	1.37579	1.62283	1.49422	3.24166	1.51325	1.62364	1.53571	1.49229	1.37579	1.62283	1.49422	10.7069	1.64838	1.97312	1.81133	1.79268	1.35877	2.2179	1.60807	791	122	170	135	147	102	129	109
K09A9.6	WBGene00010703	Uncharacterized protein	3.3104	-1.16763	-1.04118	1.00726	-1.23947	-1.20351	-1.05659	2.61572	0.888715	0.665126	0.830502	0.89915	0.578988	0.621472	0.809303	2.61572	0.888715	0.665126	0.830502	0.89915	0.578988	0.621472	0.809303	7.25272	0.761089	0.584129	0.749641	0.837867	0.435769	0.632853	0.659422	893	93	87	92	113	57	64	76
hasp-2	WBGene00021214	HASPin kinase related	3.31003	-1.13009	-1.08945	-1.14878	-1.07321	-1.11793	-1.12918	2.25692	0.530074	0.353633	0.406475	0.329977	0.428137	0.369244	0.354804	2.25692	0.530074	0.353633	0.406475	0.329977	0.428137	0.369244	0.354804	5.5034	0.389094	0.286533	0.319254	0.268599	0.308541	0.349962	0.248441	334	24	21	20	18	19	17	14
flp-28	WBGene00044686	FMRF-Like Peptide	3.30954	1.26422	1.24999	1.30627	1.12035	1.15075	1.07091	6.01292	4.28629	4.62453	4.6082	4.67174	4.45024	4.48886	4.38512	6.01292	4.28629	4.62453	4.6082	4.67174	4.45024	4.48886	4.38512	44.6087	18.5141	23.9062	23.9784	25.6658	20.301	22.4895	18.797	448	187	279	242	285	207	177	173
arrd-10	WBGene00010268	ARRestin Domain protein	3.30258	1.10465	1.04282	1.06839	1.17989	1.02783	1.05046	2.40896	0.685368	0.828961	0.745858	0.780808	0.924021	0.724969	0.756387	2.40896	0.685368	0.828961	0.745858	0.780808	0.924021	0.724969	0.756387	6.22617	0.543357	0.756282	0.656485	0.697812	0.777378	0.755023	0.605839	366	33	52	39	46	47	35	33
sbt-1	WBGene00011392	Seven B Two (mammalian 7BT prohormone convertase chaperone) homolog	3.30145	1.33433	1.22135	1.62436	1.18888	1.61659	1.40022	5.7581	4.03499	4.45111	4.32347	4.73486	4.2846	4.72795	4.52065	5.7581	4.03499	4.45111	4.32347	4.73486	4.2846	4.72795	4.52065	38.912	15.4141	21.059	19.2373	26.708	17.7583	26.824	20.7773	1150	457	722	572	872	533	622	561
vha-11	WBGene00006920	V-type proton ATPase subunit C	3.30115	1.22648	1.24558	-1.03354	1.11381	1.22476	-1.05099	7.97437	6.2514	6.54592	6.56821	6.2038	6.4069	6.5439	6.17965	7.97437	6.2514	6.54592	6.56821	6.2038	6.4069	6.5439	6.17965	240.609	77.53	95.3639	99.2857	80.0688	88.8463	97.433	74.8762	12734	4115	5901	5306	4673	4766	4047	3623
ptr-24	WBGene00004238	PaTched Related family	3.30046	-1.02774	1.08027	1.06346	-1.29324	-1.41311	1.19321	5.82894	4.10627	4.0668	4.21767	4.19503	3.73528	3.6074	4.36112	5.82894	4.10627	4.0668	4.21767	4.19503	3.73528	3.6074	4.36112	40.2971	16.3303	15.6055	17.6386	17.6594	11.4095	11.8497	18.4801	4719	1914	2124	2201	2299	1439	1150	1984
T23B12.11	WBGene00044553	Uncharacterized protein	3.29623	1.1101	1.23149	1.27621	1.15227	-1.17802	1.10499	3.88199	2.16117	2.31186	2.46158	2.51304	2.36565	1.92482	2.30521	3.88199	2.16117	2.31186	2.46158	2.51304	2.36565	1.92482	2.30521	15.2361	3.10824	3.77412	4.30596	4.70107	3.53249	3.03264	3.50006	279	57	80	80	95	66	44	59
C34C12.7	WBGene00007926	Uncharacterized protein	3.29595	1.41382	1.57215	1.27331	1.76815	1.82702	1.02439	3.72825	2.00756	2.50716	2.6603	2.35614	2.8298	2.87705	2.04233	3.72825	2.00756	2.50716	2.6603	2.35614	2.8298	2.87705	2.04233	14.0527	2.69835	4.47279	5.09016	4.12708	5.31112	6.83253	2.76465	558	108	207	204	182	215	213	101
Y45G12C.1	WBGene00021565	Uncharacterized protein	3.29532	1.41458	1.76603	1.3258	1.20862	1.0963	1.63791	2.29359	0.573168	1.07354	1.39367	0.980028	0.846526	0.705812	1.28502	2.29359	0.573168	1.07354	1.39367	0.980028	0.846526	0.705812	1.28502	5.66147	0.431234	1.05226	1.53682	0.954211	0.700876	0.734137	1.25577	299	23	65	82	56	38	31	61
trap-1	WBGene00022122	TRanslocon-Associated Protein	3.29515	1.1327	1.09803	-1.05469	1.11254	1.1327	1.03976	9.51714	7.7968	7.97656	7.93171	7.71998	7.95066	7.97656	7.85304	9.51714	7.7968	7.97656	7.93171	7.71998	7.95066	7.97656	7.85304	925.424	221.976	254.896	243.112	217.508	245.986	243.992	236.049	33258	7994	10628	8788	8641	8980	6875	7750
C15C7.5	WBGene00015791	Uncharacterized protein	3.29298	1.75387	1.87872	1.60859	1.66324	1.75412	1.66995	6.57951	4.86012	5.67066	5.76987	5.54592	5.59412	5.67087	5.59992	6.57951	4.86012	5.67066	5.76987	5.54592	5.59412	5.67087	5.59992	65.3491	28.2223	51.1326	55.9183	49.5432	49.0243	52.7387	48.6282	1147	497	1042	988	962	874	726	780
Y15E3A.4	WBGene00012443	Uncharacterized protein	3.29285	1.16772	1.06975	1.0134	1.04523	-1.00119	-1.008	4.4839	2.76456	2.98825	2.86183	2.78376	2.82837	2.76284	2.75306	4.4839	2.76456	2.98825	2.86183	2.78376	2.82837	2.76284	2.75306	21.0173	5.4039	6.60034	6.06506	5.89121	5.30543	6.18248	5.11126	1376	355	502	400	427	353	318	306
egl-44	WBGene00001208	Transcription enhancer factor-like protein egl-44	3.28777	-1.10766	1.06376	1.14442	1.06823	1.24951	1.06086	5.18194	3.46483	3.31732	3.554	3.65945	3.56006	3.78619	3.55007	5.18194	3.46483	3.31732	3.554	3.65945	3.56006	3.78619	3.55007	28.7685	9.97596	8.82751	10.5671	11.7728	9.91284	13.4376	9.58957	1690	596	611	627	767	605	623	520
ifb-1	WBGene00002053	Intermediate filament protein ifb-1	3.28669	1.04034	-1.00078	-1.17331	-1.06942	-1.35177	-1.23315	7.00301	5.28637	5.34343	5.28524	5.05579	5.18954	4.85152	4.98402	7.00301	5.28637	5.34343	5.28524	5.05579	5.18954	4.85152	4.98402	92.756	38.8009	40.1189	39.5925	34.4352	35.8783	29.4012	29.9178	7548	3182	3806	3259	3106	2979	1888	2229
Y34B4A.9	WBGene00021325	Uncharacterized protein	3.28418	1.70805	2.16883	-1.06335	1.65468	2.66022	1.03497	7.64779	5.93226	6.70461	7.04917	5.84364	6.65881	7.3438	5.98185	7.64779	5.93226	6.70461	7.04917	5.84364	6.65881	7.3438	5.98185	177.882	62.2436	106.644	136.682	61.3876	105.504	161.992	64.8536	5600	1964	3896	4328	2137	3374	3999	1865
T11B7.5	WBGene00011708	Uncharacterized protein	3.28079	1.44448	1.44905	1.64642	1.02704	1.35498	1.509	3.12116	1.40712	1.93767	1.94223	2.12646	1.44561	1.84539	2.00072	3.12116	1.40712	1.93767	1.94223	2.12646	1.44561	1.84539	2.00072	10.0375	1.48721	2.66945	2.72199	3.40939	1.46255	2.80733	2.6669	282	42	87	77	106	42	62	69
apy-1	WBGene00017244	Apyrase apy-1	3.27896	1.72856	1.6964	1.24748	1.00473	1.4874	1.34621	6.88773	5.17449	5.96406	5.93697	5.49351	5.18129	5.74729	5.60339	6.88773	5.17449	5.96406	5.93697	5.49351	5.18129	5.74729	5.60339	83.4858	35.8844	62.8911	63.4543	47.6621	35.6571	55.5334	48.674	4140	1784	3619	3165	2613	1797	2160	2205
gst-6	WBGene00001754	Probable glutathione S-transferase 6	3.27891	4.35293	5.71839	3.0642	2.54768	3.31168	4.62423	5.39293	3.67971	5.8017	6.19532	5.29522	5.0289	5.40728	5.88893	5.39293	3.67971	5.8017	6.19532	5.29522	5.0289	5.40728	5.88893	31.8786	11.8218	56.2085	76.4852	41.1363	31.5994	43.6678	60.4509	920	342	1881	2219	1312	926	988	1593
F53F1.6	WBGene00009984	Uncharacterized protein	3.27852	1.24249	-1.16393	2.81838	1.28209	1.16799	1.54249	2.79453	1.08149	1.39472	0.862483	2.57635	1.43998	1.30552	1.70674	2.79453	1.08149	1.39472	0.862483	2.57635	1.43998	1.30552	1.70674	8.26234	1.01128	1.54371	0.788853	4.9147	1.45184	1.63766	2.02859	332	41	73	32	218	60	52	75
pcp-1	WBGene00003956	Putative serine protease pcp-1	3.27585	1.23485	1.15545	-1.34128	1.0458	-1.40807	-1.46917	7.14028	5.42841	5.73275	5.63686	5.00481	5.49301	4.93469	4.87341	7.14028	5.42841	5.73275	5.63686	5.00481	5.49301	4.93469	4.87341	106.325	43.0206	53.6803	51.2723	33.1118	45.5256	31.1638	27.6436	8383	3399	4911	4066	2886	3646	1927	1991
fat-7	WBGene00001399	Delta(9)-fatty-acid desaturase fat-7	3.27507	-4.96382	-3.17439	-5.09807	-9.23533	-7.99189	-6.67595	6.16848	4.45695	2.1455	2.79047	2.107	1.24979	1.45841	1.71798	6.16848	4.45695	2.1455	2.79047	2.107	1.24979	1.45841	1.71798	49.1717	20.7917	3.24832	5.68001	3.355	1.17371	1.89238	2.05112	2322	984	178	270	176	57	71	89
R13A5.11	WBGene00020053	Serine/threonine-protein phosphatase	3.27493	-1.02066	1.13575	-1.12864	-1.11264	-1.24989	1.1254	2.28922	0.577758	0.548257	0.761403	0.403166	0.423767	0.25596	0.748194	2.28922	0.577758	0.548257	0.761403	0.403166	0.423767	0.25596	0.748194	5.63511	0.436109	0.467378	0.672067	0.338854	0.306163	0.238576	0.597903	339	28	35	44	25	20	12	35
let-522	WBGene00010870	Uncharacterized protein	3.27459	-1.04825	1.10254	1.3501	1.00666	1.3501	1.16952	4.93806	3.22674	3.15877	3.36757	3.65981	3.23632	3.65981	3.45266	4.93806	3.22674	3.15877	3.36757	3.65981	3.23632	3.65981	3.45266	25.9343	8.07199	7.66764	9.13768	11.7811	7.63154	12.3028	8.79215	467	146	160	166	234	140	174	145
lec-3	WBGene00002266	32 kDa beta-galactoside-binding lectin lec-3	3.2741	1.23032	1.17701	1.24538	1.1508	1.00118	1.47304	5.14096	3.42986	3.7289	3.66498	3.74644	3.6325	3.43156	3.98865	5.14096	3.42986	3.7289	3.66498	3.74644	3.6325	3.43156	3.98865	28.3254	9.55892	12.1103	11.4229	12.6305	10.5453	10.4704	13.7419	1272	412	612	507	623	486	360	560
vha-15	WBGene00020507	Probable V-type proton ATPase subunit H 2	3.27295	1.24726	1.19262	-1.04586	1.08422	1.18435	-1.11843	7.4322	5.72161	6.04037	5.97574	5.65692	5.83826	5.9657	5.56013	7.4322	5.72161	6.04037	5.97574	5.65692	5.83826	5.9657	5.56013	142.968	53.0965	66.4876	65.0666	53.8421	58.6656	64.66	47.3926	9380	3491	5061	4294	3905	3910	3326	2841
W03G9.5	WBGene00021016	Uncharacterized protein	3.26615	1.04336	1.03732	1.06708	1.00146	1.04274	1.07164	1.75312	0.045532	0.106765	0.0983956	0.139204	0.0476301	0.105905	0.145352	1.75312	0.045532	0.106765	0.0983956	0.139204	0.0476301	0.105905	0.145352	3.55081	0.029303	0.088452	0.072981	0.10966	0.028907	0.097368	0.091019	242	3	7	6	9	3	6	6
kin-2	WBGene00002190	cAMP-dependent protein kinase regulatory subunit	3.26252	-1.09528	-1.08358	-1.32864	-1.18785	-1.22577	-1.05507	6.57887	4.87289	4.74159	4.75709	4.46293	4.62453	4.5792	4.79555	6.57887	4.87289	4.74159	4.75709	4.46293	4.62453	4.5792	4.79555	65.3455	28.4085	26.039	26.7402	21.6361	23.1303	24.1572	26.1395	3331	1441	1521	1364	1206	1179	953	1205
C33A12.19	WBGene00007890	Uncharacterized protein	3.26143	1.28917	1.428	2.59758	1.40124	1.8485	1.77885	4.89785	3.19235	3.55879	3.70635	4.56952	3.67905	4.0787	4.0233	4.89785	3.19235	3.55879	3.70635	4.56952	3.67905	4.0787	4.0233	25.3952	7.84847	10.5657	11.848	23.472	10.9135	16.5024	14.042	433	135	210	204	442	190	221	219
Y44A6D.3	WBGene00012854	Uncharacterized protein	3.26105	-1.12267	1.00151	-1.26947	-1.08752	-1.23619	-1.12267	4.92128	3.21594	3.04901	3.21811	2.87171	3.0949	2.91004	3.04901	4.92128	3.21594	3.04901	3.21811	2.87171	3.0949	2.91004	3.04901	25.6783	8.01007	6.99128	8.00127	6.32007	6.76385	6.9967	6.45834	826	259	262	260	226	223	177	192
ddo-1	WBGene00008127	D-aspartate (D) Oxidase	3.25968	2.2341	2.68802	1.53312	2.24042	2.11041	1.53712	3.19235	1.48762	2.64732	2.91417	2.10409	2.65139	2.56514	2.10786	3.19235	1.48762	2.64732	2.91417	2.10409	2.65139	2.56514	2.10786	10.415	1.60462	5.05403	6.30312	3.3439	4.58488	5.28782	2.93351	470	73	262	235	132	175	194	95
F38B6.4	WBGene00018174	Phosphoribosylglycinamide formyltransferase	3.25741	-1.17867	1.02369	1.09316	-1.36343	1.19306	1.62859	4.51374	2.81002	2.57286	2.8438	2.93853	2.36278	3.06469	3.51364	4.51374	2.81002	2.57286	2.8438	2.93853	2.36278	3.06469	3.51364	21.2808	5.62101	4.76321	5.97603	6.68686	3.52239	7.82279	9.26812	2894	766	752	818	1005	487	834	1151
asp-8	WBGene00019105	ASpartyl Protease	3.25598	15.0294	15.8735	1.4302	2.43872	6.26719	4.94126	3.71927	2.01618	5.9259	6.00473	2.5324	3.30231	4.664	4.32106	3.71927	2.01618	5.9259	6.00473	2.5324	3.30231	4.664	4.32106	13.9936	2.71156	61.3085	66.3764	4.7698	8.01768	25.4572	17.9354	755	147	3835	3599	285	440	1076	884
ttr-42	WBGene00045268	TransThyretin-Related family domain	3.25361	-1.30807	-1.35638	-1.55394	1.01761	-1.83092	-1.43495	6.49759	4.79555	4.40811	4.35579	4.15962	4.82074	3.92298	4.27455	6.49759	4.79555	4.40811	4.35579	4.15962	4.82074	3.92298	4.27455	61.5031	27.1461	20.3129	19.7338	17.1154	26.8921	14.9027	17.277	1200	531	460	388	369	533	228	308
K11D9.3	WBGene00010772	Uncharacterized protein	3.25142	1.17262	1.14883	-1.17638	-1.15261	1.07817	1.13213	3.7289	2.02783	2.25756	2.228	1.79347	1.82292	2.13642	2.20686	3.7289	2.02783	2.25756	2.228	1.79347	1.82292	2.13642	2.20686	14.0527	2.73868	3.57363	3.50143	2.44035	2.18761	3.69202	3.20849	942	184	278	236	181	149	194	197
M117.4	WBGene00010920	Uncharacterized protein	3.25019	-1.09083	-1.2845	1.04508	1.02797	1.10704	1.09418	2.19145	0.490924	0.365501	0.129714	0.554541	0.530716	0.637635	0.620771	2.19145	0.490924	0.365501	0.129714	0.554541	0.530716	0.637635	0.620771	5.2282	0.354686	0.300124	0.09689	0.463513	0.394424	0.65191	0.474031	483	33	33	10	48	38	48	40
cex-2	WBGene00023408	Calexcitin-2	3.24663	1.11654	-1.34558	1.49942	-1.12595	1.23931	1.28082	3.70198	2.00304	2.16207	1.57481	2.58744	1.8319	2.31258	2.36011	3.70198	2.00304	2.16207	1.57481	2.58744	1.8319	2.31258	2.36011	13.8493	2.68957	3.29267	1.87997	4.94318	2.20768	4.30171	3.65359	366	71	101	50	140	59	88	87
ZK1128.7	WBGene00014233	Uncharacterized protein	3.24339	-1.21339	-1.13499	-1.06043	-1.07618	1.45706	-1.43662	3.81394	2.11644	1.8374	1.93376	2.03179	2.01052	2.6595	1.59376	3.81394	2.11644	1.8374	1.93376	2.03179	2.01052	2.6595	1.59376	14.6982	2.9828	2.41105	2.70635	3.1051	2.57114	5.70767	1.81461	422	86	81	79	99	75	129	48
W06D4.3	WBGene00012297	Uncharacterized protein	3.24048	1.66797	2.00254	1.52535	1.68816	1.80862	1.84851	1.73004	0.0338271	0.771917	1.03566	0.64297	0.789278	0.888715	0.92019	1.73004	0.0338271	0.771917	1.03566	0.64297	0.789278	0.888715	0.92019	3.46522	0.020719	0.68985	0.990403	0.55231	0.635687	0.959742	0.794936	132	1	31	38	24	25	29	28
ent-2	WBGene00010701	Equilibrative Nucleoside Transporter	3.23994	1.03527	-1.00793	-1.18026	1.03386	-1.13892	-1.09854	6.74859	5.05263	5.10263	5.04123	4.81353	5.10067	4.86496	4.91704	6.74859	5.05263	5.10263	5.04123	4.81353	5.10067	4.86496	4.91704	74.9717	32.972	33.6385	32.7925	28.4656	33.4988	29.7611	28.5865	4710	2076	2452	2073	1977	2138	1466	1641
F53B3.6	WBGene00018744	Uncharacterized protein	3.2389	-1.00564	-1.01054	-1.13312	1.43351	1.14649	1.06395	2.12828	0.432774	0.424655	0.417653	0.252478	0.952329	0.629993	0.5222	2.12828	0.432774	0.424655	0.417653	0.252478	0.952329	0.629993	0.5222	4.94117	0.305559	0.344569	0.332277	0.201699	0.80582	0.642031	0.386885	222	14	18	15	11	37	23	16
R01B10.3	WBGene00019805	Uncharacterized protein	3.23878	-1.08574	-1.33414	-1.08318	-1.20222	1.0714	-1.04669	5.97528	4.27983	4.16116	3.86392	4.16455	4.01413	4.37933	4.21399	5.97528	4.27983	4.16116	3.86392	4.16455	4.01413	4.37933	4.21399	43.6927	18.4451	16.7211	13.4014	17.1744	14.3813	20.7054	16.5174	603	255	268	186	262	202	224	209
pud-2.1	WBGene00017490	Protein Up-regulated in Daf-2(gf)	3.23667	-7.49235	-12.086	-10.1284	-8.66442	-3.16098	-8.39201	8.74152	7.04701	4.14159	3.45174	3.70667	3.93191	5.38663	3.97799	8.74152	7.04701	4.14159	3.45174	3.70667	3.93191	5.38663	3.97799	511.797	133.858	16.5463	9.80523	12.2142	13.4285	43.1765	13.6279	11050	2896	415	213	292	295	731	269
irg-4	WBGene00008584	Infection Response Gene	3.2366	-9.53812	-7.09046	-16.8617	-14.0233	-17.7462	-15.6516	6.64745	4.95297	1.69927	2.12709	0.877291	1.14321	0.803531	0.984736	6.64745	4.95297	1.69927	2.12709	0.877291	1.14321	0.803531	0.984736	69.0233	30.1341	2.14092	3.18031	0.813279	1.02053	0.845294	0.862904	3327	1456	120	155	44	50	32	38
T19H12.3	WBGene00020589	Uncharacterized protein	3.23627	-1.00956	1.16541	-1.38225	-1.15325	1.01255	-1.10868	3.10076	1.40642	1.3927	1.62726	0.939407	1.20072	1.42442	1.25758	3.10076	1.40642	1.3927	1.62726	0.939407	1.20072	1.42442	1.25758	9.92416	1.48703	1.53986	1.99297	0.894978	1.1071	1.83081	1.22002	186	28	34	38	19	21	27	21
F25E5.8	WBGene00017789	Uncharacterized protein	3.23421	1.01697	-1.11957	1.30189	-1.07863	1.25243	1.03574	6.26794	4.57452	4.59879	4.41158	4.95513	4.46532	4.89925	4.62518	6.26794	4.57452	4.59879	4.41158	4.95513	4.46532	4.89925	4.62518	52.6042	22.7419	23.5171	20.6161	31.8623	20.5662	30.5151	22.6469	1673	730	870	674	1132	667	770	675
ZK896.5	WBGene00014136	Uncharacterized protein	3.23249	4.96824	3.87504	2.75584	4.76362	5.79149	3.23543	2.72132	1.02868	3.34141	2.98289	2.49117	3.28074	3.56261	2.72264	2.72132	1.02868	3.34141	2.98289	2.49117	3.28074	3.56261	2.72264	7.85857	0.939112	8.99092	6.70416	4.62047	7.87106	11.4578	4.99236	531	64	705	456	346	541	607	309
pud-2.2	WBGene00017500	Protein Up-regulated in Daf-2(gf)	3.23125	-7.44129	-12.0662	-10.1182	-8.64348	-3.16533	-8.38086	8.73765	7.04556	4.15	3.45266	3.70667	3.93394	5.3832	3.97846	8.73765	7.04556	4.15	3.45266	3.70667	3.93394	5.3832	3.97846	511.732	133.744	16.6262	9.80523	12.2142	13.4407	43.0817	13.6279	11049	2894	417	213	292	295	730	269
Y37D8A.3	WBGene00012545	Uncharacterized protein	3.22977	1.28522	1.03097	-1.05939	-1.23117	1.02651	-1.21354	4.32347	2.63204	2.99406	2.67604	2.54881	2.33201	2.66979	2.35282	4.32347	2.63204	2.99406	2.67604	2.54881	2.33201	2.66979	2.35282	19.3345	4.83181	6.62941	5.1303	4.82364	3.44687	5.75179	3.63993	827	208	329	221	229	150	193	143
K08C7.1	WBGene00010646	Uncharacterized protein	3.22825	-1.22332	-1.38204	-1.0721	-1.26289	-1.36482	-1.28761	3.90637	2.21562	1.92482	1.74882	2.11517	1.87888	1.76691	1.85092	3.90637	2.21562	1.92482	1.74882	2.11517	1.87888	1.76691	1.85092	15.4861	3.29357	2.63568	2.26419	3.3776	2.29053	2.57019	2.30041	932	199	185	138	225	141	122	127
ndnf-1	WBGene00021893	NDNF (Neuron Derived Neurotrophic Factor) homolog	3.22669	-1.08708	1.05441	1.28879	1.10144	-1.20716	1.12452	3.13215	1.44209	1.32164	1.51852	1.80811	1.58148	1.17048	1.6114	3.13215	1.44209	1.32164	1.51852	1.80811	1.58148	1.17048	1.6114	10.0973	1.53975	1.41606	1.77633	2.47517	1.69339	1.3822	1.84633	756	116	123	134	205	129	82	127
ugt-4	WBGene00013905	Non-coding transcript of protein-coding gene ugt-4	3.2215	-1.17047	1.01726	1.15672	-1.28321	-1.01314	-1.0654	4.69481	3.00708	2.77999	3.03176	3.21712	2.64732	2.98825	2.91568	4.69481	3.00708	2.77999	3.03176	3.21712	2.64732	2.98825	2.91568	22.8952	6.72264	5.56107	6.95876	8.33528	4.55795	7.34335	5.79385	1710	504	482	524	689	346	430	396
W02B12.1	WBGene00012201	Uncharacterized protein	3.2209	-1.37805	-1.43381	-2.41056	-1.45213	-2.33619	-1.67789	5.38252	3.69506	3.23243	3.17521	2.42569	3.15689	2.4709	2.94842	5.38252	3.69506	3.23243	3.17521	2.42569	3.15689	2.4709	2.94842	31.6665	11.9549	8.19617	7.72065	4.39467	7.10219	4.91912	5.93464	1690	640	508	415	260	385	206	290
C52G5.2	WBGene00008260	Uncharacterized protein	3.21977	1.16077	-1.18599	-1.1203	-1.20078	-1.17896	-1.4485	4.55253	2.86557	3.08065	2.61949	2.70168	2.60161	2.62806	2.33101	4.55253	2.86557	3.08065	2.61949	2.70168	2.60161	2.62806	2.33101	21.6325	5.93832	7.20072	4.91938	5.46234	4.38769	5.58409	3.56887	582	160	225	134	163	120	118	88
T09B4.3	WBGene00020377	Uncharacterized protein	3.21955	-1.23357	-1.18638	-1.30669	-1.10733	-1.41712	-1.24449	2.54283	0.855973	0.553129	0.609401	0.470052	0.708881	0.353008	0.540416	2.54283	0.855973	0.553129	0.609401	0.470052	0.708881	0.353008	0.540416	6.85829	0.725832	0.47261	0.506357	0.394927	0.560481	0.333855	0.407587	170	17	14	13	12	15	7	7
Y7A5A.1	WBGene00012407	Uncharacterized protein	3.21731	1.32682	1.51707	-1.06413	-1.04968	1.3837	1.20112	6.09659	4.41073	4.81871	5.01202	4.32106	4.34078	4.87927	4.67511	6.09659	4.41073	4.81871	5.01202	4.32106	4.34078	4.87927	4.67511	47.1603	20.1788	27.3965	32.0749	19.3844	18.5088	30.0646	23.5171	3541	1519	2387	2423	1609	1412	1770	1613
inx-5	WBGene00002127	Innexin-5	3.21554	-1.06809	1.07226	-1.21034	1.22435	-1.26579	-1.23468	4.25053	2.56546	2.47043	2.66611	2.29005	2.85748	2.22542	2.26132	4.25053	2.56546	2.47043	2.66611	2.29005	2.85748	2.22542	2.26132	18.6162	4.55075	4.3047	5.10174	3.89341	5.44554	3.98462	3.37058	1162	285	312	321	269	346	195	193
C23H5.15	WBGene00219423	Uncharacterized protein	3.21494	-1.04101	1.14917	1.26089	1.17134	1.35879	-1.00155	2.25849	0.573697	0.515716	0.774294	0.908134	0.801858	1.01602	0.571456	2.25849	0.573697	0.515716	0.774294	0.908134	0.801858	1.01602	0.571456	5.51194	0.4322	0.43752	0.683135	0.848293	0.65135	1.1328	0.432887	153	12	14	19	26	19	25	11
nhr-109	WBGene00003699	Nuclear Hormone Receptor family	3.21462	1.15549	1.22293	1.48707	1.54698	1.44038	1.42449	3.53631	1.85166	2.06017	2.142	2.42413	2.48112	2.3781	2.36211	3.53631	1.85166	2.06017	2.142	2.42413	2.48112	2.3781	2.36211	12.6117	2.31651	2.99374	3.23333	4.38732	3.95012	4.55965	3.66168	551	103	151	142	212	176	155	146
fkb-8	WBGene00001433	Peptidylprolyl isomerase	3.21069	1.1162	1.17266	1.09715	1.27442	1.39425	1.21668	3.83362	2.15074	2.30933	2.38053	2.2845	2.50058	2.63023	2.43369	3.83362	2.15074	2.30933	2.38053	2.2845	2.50058	2.63023	2.43369	14.862	3.07407	3.7677	4.00373	3.87791	4.01152	5.59511	3.89742	603	125	178	164	174	166	178	145
lin-10	WBGene00002999	Protein lin-10	3.2096	1.13501	1.2243	1.06271	1.30067	1.23592	1.11223	5.14576	3.46337	3.64607	3.75532	3.55112	3.84262	3.76895	3.61683	5.14576	3.46337	3.64607	3.75532	3.55112	3.84262	3.76895	3.61683	28.3781	9.95886	11.3057	12.399	10.7779	12.4896	13.2093	10.116	3692	1303	1709	1625	1552	1655	1354	1206
gpd-2	WBGene00001684	Glyceraldehyde-3-phosphate dehydrogenase 2	3.2089	1.06027	-1.00413	-1.09956	-1.32194	-1.00539	1.07518	8.28566	6.60358	6.68802	6.59764	6.46665	6.20093	6.59583	6.70816	8.28566	6.60358	6.68802	6.59764	6.46665	6.20093	6.59583	6.70816	328.322	98.9275	105.386	101.358	95.9836	76.4847	101.222	108.176	15641	4723	5825	4857	5055	3702	3781	4708
agxt-1	WBGene00011767	Serine--pyruvate aminotransferase	3.20787	1.13221	1.21242	1.14931	1.12235	1.13899	-1.05356	5.31215	3.63054	3.80968	3.90842	3.83131	3.79706	3.81829	3.55527	5.31215	3.63054	3.80968	3.90842	3.83131	3.79706	3.81829	3.55527	30.4528	11.3502	12.9518	13.9519	13.5198	12.0233	13.7639	9.63738	1723	644	850	794	846	691	611	498
metr-1	WBGene00010988	Probable methionine synthase	3.20687	1.17613	1.06983	1.06983	1.05113	1.13566	1.00134	7.66328	5.98211	6.21617	6.0795	6.0795	6.05405	6.16565	5.98405	7.66328	5.98211	6.21617	6.0795	6.0795	6.05405	6.16565	5.98405	179.796	64.171	75.7169	70.1762	73.5426	68.7777	75.1646	65.0337	31306	11196	15296	12290	14155	12165	10261	10344
T15B12.1	WBGene00020530	Uncharacterized protein	3.20678	1.06242	1.09149	1.08969	1.13651	1.06601	1.10604	4.92722	3.2461	3.33345	3.37239	3.37001	3.4307	3.33832	3.39151	4.92722	3.2461	3.33345	3.37239	3.37001	3.4307	3.33832	3.39151	25.7874	8.22563	8.96891	9.18037	9.38641	8.87205	9.69881	8.43704	858	271	358	311	355	303	257	270
zig-7	WBGene00006984	Zwei Ig domain protein zig-7	3.2062	-1.23734	-1.25055	-1.22181	-1.52449	-1.34649	-1.12069	6.21429	4.53343	4.22619	4.21086	4.24441	3.92511	4.10422	4.36904	6.21429	4.53343	4.22619	4.21086	4.24441	3.92511	4.10422	4.36904	50.8752	22.1024	17.8723	17.5969	18.3129	13.3863	16.8219	18.5846	1701	741	694	592	677	455	441	568
C15A11.2	WBGene00007597	Uncharacterized protein	3.20448	-1.43666	-1.3908	-1.38231	-1.4652	-1.47464	-1.46403	2.46811	0.788021	0.265306	0.312109	0.32094	0.236923	0.227656	0.238075	2.46811	0.788021	0.265306	0.312109	0.32094	0.236923	0.227656	0.238075	6.47809	0.651888	0.213372	0.24125	0.259803	0.162073	0.2105	0.164761	158	16	7	6	7	4	4	4
F18E3.13	WBGene00045276	Uncharacterized protein	3.1945	1.03008	-1.09759	1.20712	-1.38415	-1.69189	-1.07598	5.91494	4.23935	4.2821	4.10501	4.51092	3.77036	3.48072	4.1337	5.91494	4.23935	4.2821	4.10501	4.51092	3.77036	3.48072	4.1337	42.2595	17.8959	18.5647	16.2578	22.44	11.7608	10.8178	15.3843	530	225	271	206	311	150	107	177
K08F8.5	WBGene00010682	Uncharacterized protein	3.19314	-1.04382	1.02314	1.00611	1.11986	-1.12561	1.06347	1.90148	0.226508	0.16463	0.259506	0.23529	0.38983	0.0558044	0.31529	1.90148	0.226508	0.16463	0.259506	0.23529	0.38983	0.0558044	0.31529	4.08636	0.156449	0.13122	0.199728	0.179652	0.275995	0.050312	0.215266	208	8	8	11	11	15	3	10
spp-16	WBGene00005001	SaPosin-like Protein family	3.1854	1.22027	1.4272	-1.26094	1.02797	1.46112	1.02687	6.45708	4.78561	5.07281	5.2988	4.45111	4.82541	5.33269	4.82387	6.45708	4.78561	5.07281	5.2988	4.45111	4.82541	5.33269	4.82387	59.6763	26.8657	32.7937	40.0708	21.4126	26.9994	41.5786	26.6766	848	383	541	573	337	390	464	347
F21D12.3	WBGene00017663	Uncharacterized protein	3.18151	1.17409	-1.0018	1.13085	-1.06815	1.08707	-1.02595	3.05824	1.38853	1.62007	1.38593	1.56593	1.29342	1.50897	1.35157	3.05824	1.38853	1.62007	1.38593	1.56593	1.29342	1.50897	1.35157	9.69636	1.45524	1.96511	1.52244	1.9367	1.2479	1.98852	1.36273	672	101	158	107	149	88	108	87
rpl-25.1	WBGene00004438	60S ribosomal protein L23a 1	3.17704	1.20606	-1.03349	-1.11649	-1.01837	1.17756	-1.11694	8.57034	6.90266	7.17296	6.85514	6.74369	6.87641	7.13846	6.74311	8.57034	6.90266	7.17296	6.85514	6.74369	6.87641	7.13846	6.74311	434.544	121.263	146.472	120.903	116.745	121.538	143.724	111.219	8959	2505	3504	2507	2661	2546	2324	2095
T24C12.3	WBGene00020765	Uncharacterized protein	3.17563	-1.05241	-1.02829	-1.44965	-1.21338	-1.32407	-1.21673	3.93906	2.27201	2.19832	2.23176	1.73631	1.99298	1.86704	1.989	3.93906	2.27201	2.19832	2.23176	1.73631	1.99298	1.86704	1.989	15.7852	3.47157	3.39077	3.51037	2.29418	2.5233	2.86986	2.62299	1434	316	358	321	231	233	205	218
F21A3.3	WBGene00008993	Uncharacterized protein	3.17412	1.26208	-1.13016	-1.00272	1.17364	-1.22872	-1.22341	3.42936	1.76301	2.09882	1.58648	1.75909	1.994	1.46586	1.4721	3.42936	1.76301	2.09882	1.58648	1.75909	1.994	1.46586	1.4721	11.8804	2.12401	3.10738	1.91193	2.35134	2.52412	1.903	1.571	515	93	157	84	113	112	65	63
F20A1.10	WBGene00017621	Uncharacterized protein	3.17401	-1.07869	-1.48053	1.39487	-1.2512	-1.43126	1.52021	5.85249	4.18618	4.07691	3.62007	4.66631	3.86288	3.6689	4.79045	5.85249	4.18618	4.07691	3.62007	4.66631	3.86288	3.6689	4.79045	40.8754	17.2867	15.7351	11.0609	25.6307	12.7201	12.3947	25.963	661	280	295	180	458	209	158	384
T28B8.4	WBGene00012115	Uncharacterized protein	3.1726	1.00561	1.05505	1.02568	-1.00989	1.04704	-1.01037	1.69537	0.0297106	0.0377762	0.107018	0.0662959	0.0155078	0.0960229	0.0148218	1.69537	0.0297106	0.0377762	0.107018	0.0662959	0.0155078	0.0960229	0.0148218	3.36743	0.019106	0.031253	0.079866	0.048494	0.007539	0.087905	0.008344	880	6	10	21	15	2	18	2
F21C3.6	WBGene00009005	Uncharacterized protein	3.16452	1.12701	-1.14639	-1.07868	-1.09546	1.12591	-1.0488	1.96282	0.300831	0.473325	0.103727	0.19156	0.16929	0.471917	0.232096	1.96282	0.300831	0.473325	0.103727	0.19156	0.16929	0.471917	0.232096	4.32752	0.21287	0.396749	0.076338	0.147385	0.111514	0.462859	0.160701	113	6	12	2	5	3	10	4
C06A6.7	WBGene00015511	Uncharacterized protein	3.15916	1.01834	-1.01234	1.04171	1.09192	-1.03182	1.0805	1.81269	0.153152	0.179367	0.135453	0.2121	0.280016	0.107956	0.264849	1.81269	0.153152	0.179367	0.135453	0.2121	0.280016	0.107956	0.264849	3.75057	0.102141	0.138428	0.101957	0.162287	0.186331	0.099554	0.184147	179	5	8	5	9	9	4	8
zipt-2.1	WBGene00014669	Non-coding transcript of protein-coding gene zipt-2.1	3.15666	1.48845	1.95063	1.64981	1.08109	1.56372	1.85231	5.46641	3.80802	4.38182	4.77196	4.53032	3.9205	4.45299	4.69734	5.46641	3.80802	4.38182	4.77196	4.53032	3.9205	4.45299	4.69734	33.0562	12.9445	19.8778	27.0351	22.8004	13.3271	21.8899	24.0796	1844	682	1244	1432	1304	723	921	1171
ras-2	WBGene00004311	R-RAS related	3.14871	1.00044	1.02977	1.0905	-1.18291	1.20014	1.0313	5.78782	4.13306	4.1337	4.17538	4.25805	3.89073	4.39626	4.17753	5.78782	4.13306	4.1337	4.17538	4.25805	3.89073	4.39626	4.17753	39.5031	16.6118	16.4439	17.2363	18.5616	13.055	21.0378	15.9592	1167	492	564	512	606	392	488	431
ceh-79	WBGene00007749	C. Elegans Homeobox	3.14768	1.10477	1.03334	1.10911	-1.07642	-1.10003	-1.01413	2.92957	1.27528	1.41903	1.3226	1.42468	1.16905	1.13774	1.25504	2.92957	1.27528	1.41903	1.3226	1.42468	1.16905	1.13774	1.25504	9.04634	1.27575	1.58807	1.40362	1.65052	1.06208	1.33363	1.21894	561	80	115	88	114	67	65	70
elo-5	WBGene00001243	Elongation of very long chain fatty acids protein	3.14381	-1.27169	-1.27921	-1.58167	-1.17011	-1.42442	-2.06937	8.38907	6.73655	6.3898	6.3813	6.07511	6.5099	6.22617	5.68736	8.38907	6.73655	6.3898	6.3813	6.07511	6.5099	6.22617	5.68736	373.08	108.38	85.7072	87.5615	73.3398	95.623	77.7928	52.0368	14299	4162	3812	3378	3109	3724	2340	1822
vrp-1	WBGene00021869	Vitellogenin Regulating Protein	3.14225	1.25252	1.18858	-1.38045	1.15105	1.07927	-1.46951	7.41946	5.76766	6.09249	6.0169	5.30252	5.97062	5.87772	5.21233	7.41946	5.76766	6.09249	6.0169	5.30252	5.97062	5.87772	5.21233	140.644	55.3093	68.8229	66.9772	41.413	64.9864	60.861	35.9756	3270	1289	1856	1566	1064	1535	1110	764
F57H12.5	WBGene00019020	Non-coding transcript of protein-coding gene F57H12.5c	3.13635	1.29499	1.3833	1.46283	1.32204	1.23246	1.52799	1.76083	0.111741	0.484683	0.579855	0.660505	0.514504	0.413279	0.723371	1.76083	0.111741	0.484683	0.579855	0.660505	0.514504	0.413279	0.723371	3.57511	0.072308	0.40579	0.478702	0.567192	0.381059	0.401567	0.570783	262	6	36	37	47	30	25	39
ifd-1	WBGene00002057	Intermediate filament protein ifd-1	3.13573	1.61344	1.84083	1.14272	1.84455	1.67659	1.42011	2.95432	1.30552	1.99565	2.18587	1.49799	2.18879	2.05104	1.81152	2.95432	1.30552	1.99565	2.18587	1.49799	2.18879	2.05104	1.81152	9.20551	1.32231	2.82517	3.39131	1.80297	3.02136	3.39978	2.2232	736	107	262	275	160	242	214	164
W01A8.6	WBGene00012168	Uncharacterized protein	3.13295	-1.16698	-1.0205	1.12926	-1.10959	-1.22592	-1.22882	2.24779	0.600263	0.377489	0.570987	0.77564	0.450234	0.306397	0.302991	2.24779	0.600263	0.377489	0.570987	0.77564	0.450234	0.306397	0.302991	5.46365	0.458011	0.308577	0.471127	0.692661	0.323243	0.288401	0.205252	290	25	19	26	41	18	12	10
Y47G6A.3	WBGene00021633	Uncharacterized protein	3.13129	-1.08785	-1.30884	1.03403	-1.20603	-1.53957	-1.24293	3.82065	2.17389	2.05242	1.78561	2.22217	1.90363	1.55136	1.86015	3.82065	2.17389	2.05242	1.78561	2.22217	1.90363	1.55136	1.86015	14.7723	3.14618	2.9803	2.34358	3.68902	2.33987	2.07435	2.32245	431	92	101	69	119	70	48	62
Y57G11A.4	WBGene00013292	Uncharacterized protein	3.13062	1.31142	1.23081	1.18023	1.42177	1.03226	-1.31645	3.1433	1.49685	1.88798	1.79646	1.73592	2.00454	1.54266	1.1002	3.1433	1.49685	1.88798	1.79646	1.73592	2.00454	1.54266	1.1002	10.1542	1.62211	2.54064	2.37185	2.29318	2.55136	2.06158	0.992917	372	60	108	88	93	95	60	34
Y102A11A.3	WBGene00022413	Uncharacterized protein	3.13003	1.38016	1.75607	1.24669	1.4944	2.19879	1.47211	4.08881	2.44263	2.90747	3.25499	2.76073	3.0222	3.57934	3.00052	4.08881	2.44263	2.90747	3.25499	2.76073	3.0222	3.57934	3.00052	17.2104	4.0815	6.18154	8.27618	5.75854	6.25113	11.6007	6.26207	3733	887	1556	1806	1381	1378	1973	1241
F07C6.2	WBGene00008553	Uncharacterized protein	3.12788	1.81687	1.89044	1.42697	1.819	1.74076	1.63923	3.09763	1.45245	2.3139	2.37117	1.9654	2.3156	2.25217	2.16546	3.09763	1.45245	2.3139	2.37117	1.9654	2.3156	2.25217	2.16546	9.90894	1.55389	3.78471	3.97026	2.88647	3.38845	4.09537	3.09571	161	26	71	65	52	56	52	46
egl-21	WBGene00001189	Uncharacterized protein	3.12653	1.10839	1.20832	1.21657	1.02236	1.31062	1.45911	5.31714	3.67258	3.82104	3.94558	3.9554	3.70448	4.06282	4.21767	5.31714	3.67258	3.82104	3.94558	3.9554	3.70448	4.06282	4.21767	30.5015	11.7667	13.0298	14.391	14.7486	11.1594	16.3739	16.5552	2010	777	997	954	1075	747	846	997
clec-49	WBGene00012251	C-type LECtin	3.12348	-1.53438	-1.46922	-1.42997	-1.21639	-1.0623	-1.16384	5.2269	3.58375	2.96609	3.0287	3.06776	3.30114	3.49656	3.36485	5.2269	3.58375	2.96609	3.0287	3.06776	3.30114	3.49656	3.36485	29.3289	10.9952	6.47689	6.94061	7.47225	8.01046	10.9232	8.28891	1316	495	338	314	371	365	385	340
gst-20	WBGene00001768	Glutathione S-Transferase	3.1232	-2.06841	-2.96013	-2.18576	-1.62863	-1.97446	-1.92922	5.17742	3.5344	2.48587	1.96873	2.40626	2.83074	2.55294	2.58638	5.17742	3.5344	2.48587	1.96873	2.40626	2.83074	2.55294	2.58638	28.703	10.6153	4.37339	2.78158	4.33496	5.31756	5.21866	4.45174	832	309	148	82	139	157	119	118
gei-15	WBGene00001572	GEX Interacting protein	3.123	-1.22374	-1.18056	-1.08399	1.03813	-1.24676	-1.26345	3.79438	2.15145	1.86015	1.91198	2.0351	2.20543	1.83326	1.81408	3.79438	2.15145	1.86015	1.91198	2.0351	2.20543	1.83326	1.81408	14.5323	3.0772	2.45613	2.65612	3.11279	3.08683	2.78594	2.22656	830	177	163	153	197	180	125	117
phy-3	WBGene00004026	Proline HYdroxylase	3.11979	1.17109	1.32978	1.22155	1.14075	1.02468	1.40722	2.81516	1.17371	1.40157	1.5849	1.46242	1.3637	1.20889	1.66656	2.81516	1.17371	1.40157	1.5849	1.46242	1.3637	1.20889	1.66656	8.3781	1.12999	1.55506	1.90762	1.7352	1.34502	1.44773	1.95335	373	51	81	86	86	61	51	80
C27A7.5	WBGene00007756	Uncharacterized protein	3.1153	-1.2882	-1.30607	-1.48277	-1.26358	-1.55992	-1.44034	6.14582	4.50645	4.14109	4.12122	3.93815	4.16894	3.86498	3.98005	6.14582	4.50645	4.14109	4.12122	3.93815	4.16894	3.86498	3.98005	48.4188	21.6582	16.5432	16.4911	14.5459	16.2725	14.2038	13.6319	4475	1993	1766	1528	1489	1519	1026	1151
alh-9	WBGene00000115	Putative aldehyde dehydrogenase family 7 member A1 homolog	3.10897	1.21183	1.10866	-1.043	-1.15307	-1.31223	-1.15823	7.48806	5.85162	6.12881	6.00044	5.79089	5.64615	5.4596	5.6397	7.48806	5.85162	6.12881	6.00044	5.79089	5.64615	5.4596	5.6397	152.346	58.6349	70.6835	66.2744	58.9867	51.1311	45.1978	49.9303	11290	4354	6078	4940	4832	3849	2626	3380
F40E3.5	WBGene00018232	Uncharacterized protein	3.10165	-1.09835	1.07145	-1.12543	-1.09451	-1.20449	-1.1966	2.41472	0.781686	0.646354	0.881255	0.611211	0.651398	0.513263	0.522739	2.41472	0.781686	0.646354	0.881255	0.611211	0.651398	0.513263	0.522739	6.24557	0.643996	0.565593	0.806038	0.521142	0.501805	0.504284	0.387707	301	32	32	39	28	25	19	18
Y42A5A.3	WBGene00012778	Uncharacterized protein	3.09946	1.36831	1.80275	1.80779	1.33787	1.09805	1.90737	3.18763	1.55561	2.008	2.40581	2.40984	1.97555	1.69056	2.48719	3.18763	1.55561	2.008	2.40581	2.40984	1.97555	1.69056	2.48719	10.3635	1.71915	2.85602	4.0687	4.34192	2.49239	2.36901	4.13419	167	28	54	66	77	41	30	61
mrp-3	WBGene00003409	Uncharacterized protein	3.09217	-1.45017	-1.32004	-1.6598	-1.2449	-1.09548	-1.23489	3.22139	1.59278	1.05656	1.19219	0.86177	1.27675	1.46121	1.28839	3.22139	1.59278	1.05656	1.19219	0.86177	1.27675	1.46121	1.28839	10.5954	1.78239	1.02975	1.20331	0.796098	1.21395	1.8956	1.25844	2220	375	251	254	185	259	312	241
grsp-1	WBGene00012840	Glycine Rich Secreted Protein	3.09132	1.71261	-1.03137	1.06201	1.28521	1.02841	1.58209	2.59003	0.961808	1.738	0.917239	1.0486	1.32381	1.00222	1.62364	2.59003	0.961808	1.738	0.917239	1.0486	1.32381	1.00222	1.62364	7.09482	0.858193	2.21281	0.842565	1.06102	1.28519	1.11129	1.8735	192	24	70	23	32	36	24	47
C05D9.3	WBGene00015472	Uncharacterized integrin beta-like protein C05D9.3	3.09071	-1.55712	-1.43252	-1.43724	-1.56559	-1.63895	-1.53603	3.71602	2.08808	1.4492	1.56953	1.56478	1.44138	1.37532	1.46888	3.71602	2.08808	1.4492	1.56953	1.56478	1.44138	1.37532	1.46888	13.9501	2.89562	1.6361	1.87106	1.9317	1.45433	1.7495	1.56587	824	172	113	112	127	88	82	85
hlh-11	WBGene00001955	Helix-loop-helix protein 11	3.09056	-1.17176	1.01419	-1.25807	-1.07057	-1.49384	-1.10395	5.61577	3.9879	3.75923	4.00824	3.65669	3.88952	3.40888	3.84523	5.61577	3.9879	3.75923	4.00824	3.65669	3.88952	3.40888	3.84523	35.8587	14.7598	12.4044	15.1871	11.7589	13.0463	10.2671	12.1879	2077	860	838	888	761	772	470	648
K07E3.4	WBGene00019492	Uncharacterized protein	3.0875	-1.26542	-1.1856	-1.18719	-1.4214	-1.02428	-1.11092	6.18264	4.5562	4.21658	4.31059	4.30865	4.04889	4.52159	4.40445	6.18264	4.5562	4.21658	4.31059	4.30865	4.04889	4.52159	4.40445	49.6267	22.4808	17.6759	18.9936	19.2131	14.7789	23.135	19.0506	4432	2012	1832	1707	1897	1341	1620	1555
Y47D3A.32	WBGene00012938	Uncharacterized protein	3.08692	1.30403	1.2677	1.53534	1.31656	1.33626	1.12405	3.61105	1.98488	2.36786	2.3271	2.60344	2.38166	2.40308	2.15359	3.61105	1.98488	2.36786	2.3271	2.60344	2.38166	2.40308	2.15359	13.2298	2.6453	3.95491	3.82513	5.01069	3.58717	4.66433	3.06377	193	42	68	56	82	54	55	42
C35D10.3	WBGene00016441	Uncharacterized protein	3.085	-1.02943	1.12111	1.15637	1.07555	1.10097	1.2066	1.86438	0.239113	0.197271	0.404045	0.44872	0.344187	0.377886	0.510065	1.86438	0.239113	0.197271	0.404045	0.44872	0.344187	0.377886	0.510065	3.95456	0.166205	0.149463	0.317499	0.376505	0.239003	0.357095	0.377783	115	5	6	10	13	7	9	10
K11D12.13	WBGene00044535	Uncharacterized protein	3.08468	-1.09435	-1.45894	-1.1936	-1.43238	-1.42666	-1.7156	6.6515	5.02638	4.89631	4.48146	4.77106	4.50797	4.51374	4.24767	6.6515	5.02638	4.89631	4.48146	4.77106	4.50797	4.51374	4.24767	69.2106	32.3852	29.31	21.7796	27.6024	21.2607	22.9957	16.8823	1823	855	896	577	804	569	475	406
B0454.6	WBGene00015197	Uncharacterized protein	3.08411	1.18005	1.17667	1.11961	1.20684	1.29535	1.05137	3.51364	1.88878	2.12763	2.1235	2.05178	2.16001	2.26212	1.96105	3.51364	1.88878	2.12763	2.1235	2.05178	2.16001	2.26212	1.96105	12.4582	2.39431	3.19687	3.17155	3.17636	2.95682	4.12584	2.55571	1017	196	303	261	287	246	265	191
R05D3.9	WBGene00019882	Uncharacterized protein	3.08291	1.05843	1.13617	1.32356	1.0697	1.18459	1.09713	5.32488	3.70059	3.78252	3.88476	4.10501	3.79779	3.94497	3.83432	5.32488	3.70059	3.78252	3.88476	4.10501	3.79779	3.94497	3.83432	30.6488	12.006	12.6089	13.6157	16.4422	12.0262	15.1502	12.1022	2763	1085	1319	1235	1638	1101	1071	997
cyp-35C1	WBGene00007362	CYtochrome P450 family	3.08191	2.0886	2.0635	1.15052	-1.26121	1.45061	1.48459	5.72161	4.09778	5.16032	5.14287	4.30007	3.76298	4.63444	4.66785	5.72161	4.09778	5.16032	5.14287	4.30007	3.76298	4.63444	4.66785	38.0433	16.2093	35.1558	35.566	19.0945	11.6825	25.0675	23.3538	2629	1123	2819	2472	1459	820	1358	1474
ZK1240.3	WBGene00022868	Uncharacterized protein	3.0792	1.05776	1.03751	-1.12922	1.07491	1.2639	1.05012	4.59451	2.97195	3.05296	3.02507	2.79662	3.07617	3.30983	3.04251	4.59451	2.97195	3.05296	3.02507	2.79662	3.07617	3.30983	3.04251	22.0107	6.53831	7.00196	6.91992	5.94829	6.60236	9.45104	6.43709	671	197	255	228	205	212	237	187
Y11D7A.3	WBGene00012428	Uncharacterized protein	3.07729	1.5027	1.56514	1.34063	1.23051	1.47032	1.28237	5.60363	3.98197	4.56952	4.62826	4.40488	4.28122	4.53809	4.34078	5.60363	3.98197	4.56952	4.62826	4.40488	4.28122	4.53809	4.34078	35.6587	14.7019	23.0426	24.4015	20.717	17.6934	23.3685	18.22	2265	937	1699	1560	1455	1143	1164	1058
C31H2.4	WBGene00016294	Putative protein C31H2.4	3.07726	1.11293	1.14443	1.0838	-1.24442	1.00952	-1.16136	2.6711	1.04945	1.20381	1.24408	1.16555	0.733968	1.06311	0.83363	2.6711	1.04945	1.20381	1.24408	1.16555	0.733968	1.06311	0.83363	7.57159	0.967024	1.25065	1.27534	1.229	0.58481	1.20045	0.688157	385	50	74	66	70	31	48	32
sucl-1	WBGene00007350	Succinate--CoA ligase [ADP/GDP-forming] subunit alpha, mitochondrial	3.07638	1.09137	-1.03516	-1.20836	-1.09434	-1.091	-1.11099	7.47547	5.85424	5.98037	5.80439	5.58119	5.72418	5.72858	5.70239	7.47547	5.85424	5.98037	5.80439	5.58119	5.72418	5.72858	5.70239	150.542	58.6903	63.6494	57.3353	50.9323	54.0973	54.797	52.6375	6774	2646	3323	2595	2534	2473	1933	2164
K02E2.6	WBGene00010507	Uncharacterized protein	3.07604	1.04313	-1.02603	1.15379	1.03716	1.10518	1.13807	5.56366	3.94258	4.0035	3.90551	4.14896	3.99521	4.08686	4.12916	5.56366	3.94258	4.0035	3.90551	4.14896	3.99521	4.08686	4.12916	34.823	14.2492	14.9156	13.9212	16.9965	14.1398	16.6048	15.3183	602	247	299	242	325	249	225	242
C01G12.3	WBGene00007244	Uncharacterized protein	3.07542	-1.05817	-1.22263	1.05553	-1.09505	-1.13557	-1.08544	4.04042	2.41964	2.33807	2.12966	2.4976	2.28864	2.23622	2.30136	4.04042	2.41964	2.33807	2.12966	2.4976	2.28864	2.23622	2.30136	16.7534	4.00647	3.84471	3.18894	4.65166	3.32572	4.01977	3.48857	449	108	120	86	138	91	85	86
srh-237	WBGene00005444	Non-coding transcript of protein-coding gene srh-237	3.0708	1.29715	1.02375	1.01375	-1.20494	-1.441	-1.92748	3.34736	1.72874	2.10409	1.76261	1.74845	1.45978	1.20167	0.782027	3.34736	1.72874	2.10409	1.76261	1.74845	1.45978	1.20167	0.782027	11.3791	2.05269	3.12437	2.30005	2.31978	1.48939	1.43559	0.633632	478	88	153	97	108	62	43	22
gpd-3	WBGene00001685	Glyceraldehyde-3-phosphate dehydrogenase 3	3.06807	1.05582	1.07222	-1.01766	-1.35547	1.04459	1.10073	8.35278	6.73544	6.81381	6.83605	6.71019	6.29665	6.79838	6.8739	8.35278	6.73544	6.81381	6.83605	6.71019	6.29665	6.79838	6.8739	355.167	108.246	115.171	119.36	114.147	81.4439	115.858	121.793	16920	5168	6366	5720	6011	3942	4328	5301
pcp-2	WBGene00003957	Prolyl Carboxy Peptidase like	3.06702	1.11979	1.26576	-1.87625	-1.10518	-1.00922	-1.35899	4.34552	2.72869	2.89191	3.06869	1.82084	2.5844	2.71545	2.28615	4.34552	2.72869	2.89191	3.06869	1.82084	2.5844	2.71545	2.28615	19.5359	5.26129	6.07633	7.15497	2.50851	4.32332	5.96688	3.44593	2942	794	1062	1084	418	662	705	474
gst-5	WBGene00001753	Glutathione S-Transferase	3.06194	1.06163	1.66161	1.64868	1.08959	1.4669	1.1803	5.89317	4.27872	4.36499	5.0113	5.00003	4.4025	4.83149	4.51786	5.89317	4.27872	4.36499	5.0113	5.00003	4.4025	4.83149	4.51786	41.8413	18.4037	19.677	32.0644	32.9724	19.5562	29.0061	20.7415	822	369	411	502	574	354	410	366
nlp-47	WBGene00018117	Neuropeptide-Like Protein	3.06165	1.33897	1.24826	1.36715	1.20398	1.76258	1.24125	3.99576	2.38145	2.80257	2.70137	2.83262	2.64926	3.19914	2.69324	3.99576	2.38145	2.80257	2.70137	2.83262	2.64926	3.19914	2.69324	16.275	3.85977	5.65681	5.23109	6.15175	4.56871	8.70646	4.87103	205	49	83	66	86	59	86	56
K04C2.8	WBGene00044312	Uncharacterized protein	3.05479	-1.43698	-1.47485	-1.38554	-1.31712	1.07942	-1.16767	3.06734	1.45626	0.933224	0.895698	0.985814	1.05887	1.56652	1.23263	3.06734	1.45626	0.933224	0.895698	0.985814	1.05887	1.56652	1.23263	9.7483	1.55719	0.871217	0.819154	0.96214	0.924236	2.12127	1.18266	253	41	27	22	28	25	44	28
pqn-72	WBGene00004154	Prion-like-(Q/N-rich)-domain-bearing protein	3.05262	1.00314	1.07738	1.30569	-1.07931	-1.05368	1.00278	2.31677	0.706727	0.711246	0.814249	1.09154	0.596624	0.631291	0.710731	2.31677	0.706727	0.711246	0.814249	1.09154	0.596624	0.631291	0.710731	5.77863	0.566727	0.629779	0.731885	1.13316	0.450518	0.643835	0.552255	451	45	56	44	86	34	40	40
abt-1	WBGene00000019	ABC Transporter family	3.05257	1.09512	1.05198	1.04256	1.0472	1.07898	1.0325	1.71628	0.106258	0.237346	0.179367	0.166391	0.172789	0.215923	0.152397	1.71628	0.106258	0.237346	0.179367	0.166391	0.172789	0.215923	0.152397	3.42357	0.068351	0.186389	0.132726	0.129062	0.113291	0.199582	0.096474	744	15	47	29	31	25	34	21
ech-6	WBGene00001155	Probable enoyl-CoA hydratase, mitochondrial	3.05162	1.05935	1.0934	-1.03166	-1.12252	-1.11922	-1.03363	9.01445	7.40488	7.48806	7.5337	7.35991	7.23814	7.24238	7.35716	9.01445	7.40488	7.48806	7.5337	7.35991	7.23814	7.24238	7.35716	647.733	173.261	183.537	187.473	174.597	154.234	153.403	167.414	26076	6989	8573	7591	7770	6307	4842	6157
R07C3.13	WBGene00019929	Non-coding transcript of protein-coding gene R07C3.13b	3.04842	-1.05174	1.03379	-1.02942	-1.00782	-1.16678	-1.45037	2.33268	0.724614	0.651831	0.772563	0.682786	0.713376	0.502075	0.188192	2.33268	0.724614	0.651831	0.772563	0.682786	0.713376	0.502075	0.188192	5.86285	0.579716	0.572802	0.681696	0.593336	0.563846	0.493472	0.12519	155	17	19	23	22	19	13	4
Y81G3A.1	WBGene00013590	Uncharacterized protein	3.04705	-1.00448	1.01832	-1.02092	-1.11613	-1.23172	1.06411	3.57104	1.96363	1.95718	1.98982	1.93376	1.80513	1.66296	2.05328	3.57104	1.96363	1.95718	1.98982	1.93376	1.80513	1.66296	2.05328	12.908	2.59895	2.71651	2.83198	2.7934	2.1482	2.30145	2.79597	439	89	108	97	105	75	62	87
F11C1.5	WBGene00008694	Uncharacterized protein	3.04586	1.13531	1.18435	1.01166	-1.03273	-1.05671	1.04388	4.98164	3.37479	3.55788	3.61888	3.39151	3.32832	3.29521	3.43675	4.98164	3.37479	3.55788	3.61888	3.39151	3.32832	3.29521	3.43675	26.4573	9.1089	10.557	11.0581	9.56935	8.17911	9.36692	8.7157	6523	2235	2997	2707	2573	2031	1797	1929
T01B11.2	WBGene00020139	Alanine--glyoxylate aminotransferase 2-like	3.04234	1.44872	1.64821	1.36833	-1.06775	-1.00738	1.74928	6.78712	5.18194	5.71672	5.90284	5.63436	5.08737	5.17132	5.9887	6.78712	5.18194	5.71672	5.90284	5.63436	5.08737	5.17132	5.9887	77.8878	36.1336	52.87	61.894	52.8734	33.0664	37.1503	65.5055	5091	2364	4006	4069	3820	2196	1905	3910
spin-3	WBGene00008598	SPINster (Drosophila lysosomal permease) homolog	3.03818	1.47534	1.47602	1.13253	1.20392	1.20024	1.24563	2.88162	1.27842	1.83946	1.84013	1.45797	1.54616	1.54174	1.5953	2.88162	1.27842	1.83946	1.84013	1.45797	1.54616	1.54174	1.5953	8.7568	1.27946	2.41542	2.47575	1.72372	1.63853	2.0601	1.81862	591	87	189	168	129	113	109	113
lbp-3	WBGene00002255	Fatty acid-binding protein homolog 3	3.0346	2.8713	2.98957	2.43758	2.1885	2.71492	2.57247	7.39365	5.79214	7.31385	7.37208	7.07759	6.92209	7.23305	7.1553	7.39365	5.79214	7.31385	7.37208	7.07759	6.92209	7.23305	7.1553	136.348	56.1787	161.29	169.799	146.407	125.556	152.368	146.715	2894	1195	3954	3610	3423	2696	2528	2833
ctsa-1	WBGene00019605	CaThepSin A homolog	3.03241	35.2258	43.9609	21.319	17.458	40.8701	24.3629	3.74801	2.14755	7.28611	7.6057	6.56162	6.27336	7.50052	6.75416	3.74801	2.14755	7.28611	7.6057	6.56162	6.27336	7.50052	6.75416	14.173	3.06683	158.218	199.014	102.368	80.4619	179.626	111.997	822	161	8858	10546	5913	4261	7477	5200
lron-8	WBGene00020693	eLRR (extracellular Leucine-Rich Repeat) ONly	3.03089	1.33218	1.23629	1.05315	1.32671	1.03068	1.09268	3.5645	1.96476	2.37855	2.27077	2.03947	2.37262	2.00835	2.09263	3.5645	1.96476	2.37855	2.27077	2.03947	2.37262	2.00835	2.09263	12.812	2.6002	3.98585	3.63429	3.13054	3.55876	3.26594	2.893	610	124	218	175	165	170	122	126
F55A11.6	WBGene00010079	Uncharacterized protein	3.02959	-1.07698	1.09881	-1.03711	1.06237	-1.05119	-1.02036	4.89254	3.29342	3.18643	3.42936	3.24086	3.38071	3.22139	3.26434	4.89254	3.29342	3.18643	3.42936	3.24086	3.38071	3.22139	3.26434	25.3311	8.46445	7.89067	9.60876	8.47905	8.53203	8.83823	7.70732	806	274	293	305	303	281	223	227
nac-1	WBGene00003517	Sodium-dependent low-affinity dicarboxylate transporter 1	3.02741	1.29901	1.22445	1.02826	-1.06903	1.20073	1.13666	2.81054	1.21245	1.58987	1.50459	1.25266	1.11615	1.47637	1.39725	2.81054	1.21245	1.58987	1.50459	1.25266	1.11615	1.47637	1.39725	8.35155	1.19291	1.90353	1.74067	1.36439	0.995159	1.92067	1.43986	679	98	180	143	123	83	123	107
C03B8.3	WBGene00015386	Uncharacterized protein	3.02292	1.23722	1.36712	1.43202	1.04149	1.38441	1.71406	2.75667	1.16073	1.46784	1.61187	1.67878	1.21939	1.63	1.93815	2.75667	1.16073	1.46784	1.61187	1.67878	1.21939	1.63	1.93815	8.05011	1.11526	1.66873	1.96221	2.15419	1.13148	2.23398	2.48842	279	39	67	69	83	40	61	79
R10E11.5	WBGene00011217	Uncharacterized protein	3.02072	-1.30327	1.08686	-1.04163	1.33108	-1.06747	1.21314	2.75753	1.16263	0.7805	1.2828	1.1038	1.57523	1.06844	1.44138	2.75753	1.16263	0.7805	1.2828	1.1038	1.57523	1.06844	1.44138	8.05264	1.11558	0.703892	1.34202	1.14929	1.67858	1.21085	1.51371	252	45	52	38	55	52	41	47
F35F11.2	WBGene00018065	Uncharacterized protein	3.01272	1.09759	1.33086	1.02373	1.06208	1.23499	1.40156	1.76036	0.16929	0.303629	0.581652	0.203119	0.256184	0.473793	0.656325	1.76036	0.16929	0.303629	0.581652	0.203119	0.256184	0.473793	0.656325	3.57504	0.114634	0.247021	0.479561	0.156645	0.172423	0.464877	0.502666	125	5	10	17	7	7	13	16
hprt-1	WBGene00013690	Hypoxanthine PhosphoRibosylTransferase homolog	3.00936	1.13794	1.11884	1.07016	1.01003	1.05968	-1.06725	7.55965	5.9702	6.15663	6.1322	6.06803	5.9846	6.05383	5.8763	7.55965	5.9702	6.15663	6.1322	6.06803	5.9846	6.05383	5.8763	164.919	63.7309	72.2287	73.3792	73.056	65.7037	68.9798	60.043	4940	1913	2510	2211	2419	1999	1620	1643
C46C11.3	WBGene00016706	Uncharacterized protein	3.00651	1.1518	-1.12797	-1.01025	-1.10921	1.22655	1.06754	2.72974	1.14165	1.34554	0.967926	1.12694	0.992118	1.43625	1.23594	2.72974	1.14165	1.34554	0.967926	1.12694	0.992118	1.43625	1.23594	7.90707	1.08868	1.45315	0.907609	1.17873	0.844289	1.8503	1.18615	267	37	57	31	44	29	49	37
F43E2.6	WBGene00018394	Uncharacterized protein	3.00541	-1.00462	-1.19318	-1.33136	1.04705	-1.23329	-1.09813	2.08653	0.498966	0.492312	0.244155	0.0860697	0.565294	0.19645	0.363921	2.08653	0.498966	0.492312	0.244155	0.0860697	0.565294	0.19645	0.363921	4.78594	0.359805	0.412434	0.189422	0.066956	0.424189	0.182256	0.255612	66	5	7	3	1	6	2	4
F09C3.2	WBGene00008610	Uncharacterized protein	3.00009	1.35017	-1.06784	1.09715	-1.20412	1.101	1.04017	3.277	1.692	2.12514	1.5973	1.82576	1.42401	1.83081	1.74882	3.277	1.692	2.12514	1.5973	1.82576	1.42401	1.83081	1.74882	10.9393	1.99048	3.18847	1.93228	2.51375	1.42965	2.77653	2.10867	383	70	130	68	98	51	77	68
T28C6.5	WBGene00012120	Uncharacterized protein	2.99913	-1.17344	-1.14108	-1.11677	-1.05542	-1.01469	-1.22728	1.96476	0.380218	0.149472	0.189818	0.220886	0.302394	0.359173	0.0847494	1.96476	0.380218	0.149472	0.189818	0.220886	0.302394	0.359173	0.0847494	4.33495	0.272548	0.121926	0.140176	0.167529	0.205557	0.338487	0.051704	184	12	6	6	8	9	12	2
ech-7	WBGene00001156	Enoyl-CoA Hydratase	2.99635	-1.20805	-1.46005	-2.13765	-1.03443	-3.10765	-1.98707	6.66265	5.07945	4.80677	4.53343	3.98342	5.03061	3.44362	4.08881	6.66265	5.07945	4.80677	4.53343	3.98342	5.03061	3.44362	4.08881	69.8648	33.5905	27.2651	22.5102	15.0594	31.6129	10.5861	14.7928	2502	1205	1133	811	596	1150	298	484
his-71	WBGene00001945	Histone H3.3 type 1	2.99416	1.04482	-1.09424	1.21168	-1.19015	1.63679	1.36972	6.22956	4.6474	4.71065	4.51748	4.92441	4.39626	5.35828	5.10129	6.22956	4.6474	4.71065	4.51748	4.92441	4.39626	5.35828	5.10129	51.4511	24.0591	25.3955	22.3443	31.0687	19.4842	42.3584	32.99	982	461	563	429	656	378	634	576
K09B11.5	WBGene00010712	Tyrosine-protein kinase	2.99074	1.50266	1.61662	1.64878	1.82321	1.36989	1.44408	1.74318	0.162678	0.750192	0.855655	0.884079	1.02916	0.616737	0.692829	1.74318	0.162678	0.750192	0.855655	0.884079	1.02916	0.616737	0.692829	3.52225	0.109291	0.665068	0.779107	0.819693	0.890475	0.62549	0.534329	269	9	58	58	67	67	36	36
rig-6	WBGene00016354	Contactin rig-6	2.99068	-1.16492	1.12304	1.00457	-1.18827	-1.31902	-1.22766	3.71535	2.13488	1.91465	2.30228	2.14145	1.88601	1.73541	1.83896	3.71535	2.13488	1.91465	2.30228	2.14145	1.88601	1.73541	1.83896	13.9474	3.03224	2.6138	3.71857	3.44591	2.2978	2.48503	2.27475	1760	367	503	461	477	379	310	321
mans-2	WBGene00008258	Mannosyl-oligosaccharide 1,2-alpha-mannosidase C52E4.5	2.99004	-1.06468	1.04027	-1.27896	-1.02947	-1.11594	-1.34577	5.60403	4.02387	3.93345	4.08082	3.6689	3.98197	3.86561	3.59544	5.60403	4.02387	3.93345	4.08082	3.6689	3.98197	3.86561	3.59544	35.6701	15.2261	14.2057	15.9888	11.8413	13.9722	14.2098	9.93151	2943	1257	1358	1325	1078	1169	918	749
col-14	WBGene00000603	COLlagen	2.98955	2.88326	3.74977	5.99338	2.07106	5.02741	5.10353	2.01327	0.433348	1.96105	2.34015	3.01672	1.48372	2.76316	2.78484	2.01327	0.433348	1.96105	2.34015	3.01672	1.48372	2.76316	2.78484	4.50787	0.306081	2.73541	3.87045	7.16864	1.53227	6.1832	5.27764	207	15	146	179	362	72	222	221
R106.5	WBGene00206419	Uncharacterized protein	2.98858	1.16212	1.15131	1.27047	1.03007	1.57303	1.05304	6.51201	4.93255	5.1493	5.13582	5.27791	4.97529	5.58609	5.00711	6.51201	4.93255	5.1493	5.13582	5.27791	4.97529	5.58609	5.00711	62.1294	29.6939	34.8772	35.4146	40.5185	30.4288	49.5376	30.5596	433	208	282	249	312	216	271	195
col-104	WBGene00000678	COLlagen	2.98557	1.39738	1.23107	1.50671	1.09757	1.03424	1.86871	1.99443	0.416421	0.89915	0.716331	1.00782	0.550734	0.464991	1.31846	1.99443	0.416421	0.89915	0.716331	1.00782	0.550734	0.464991	1.31846	4.44629	0.292301	0.829904	0.616976	1.00127	0.409935	0.45459	1.30211	175	12	38	25	44	17	15	47
R09A1.2	WBGene00019972	Non-coding transcript of protein-coding gene R09A1.2d	2.98287	1.45963	1.15341	1.20761	1.19764	-1.09913	1.24436	3.82997	2.25327	2.79888	2.45917	2.52543	2.51346	2.11691	2.56868	3.82997	2.25327	2.79888	2.45917	2.52543	2.51346	2.11691	2.56868	14.8369	3.41066	5.64093	4.29433	4.75022	4.04931	3.61805	4.37963	659	152	279	167	218	191	121	161
C49A9.3	WBGene00016757	Uncharacterized protein	2.98256	1.19886	1.4286	1.02017	1.38244	1.42115	-1.00789	2.40685	0.830298	1.09197	1.3449	0.859112	1.29752	1.33736	0.818954	2.40685	0.830298	1.09197	1.3449	0.859112	1.29752	1.33736	0.818954	6.21601	0.694299	1.07707	1.44177	0.79214	1.25231	1.69469	0.670778	497	56	100	116	71	102	107	49
daf-36	WBGene00007536	Cholesterol 7-desaturase	2.98245	1.03668	1.10797	-1.44041	1.10431	1.29491	-1.23987	4.01496	2.43846	2.49044	2.58638	1.91198	2.5816	2.81131	2.12828	4.01496	2.43846	2.49044	2.58638	1.91198	2.5816	2.81131	2.12828	16.4717	4.07384	4.39095	4.79694	2.73659	4.3079	6.42106	2.98443	985	244	305	289	181	262	301	163
F22E5.1	WBGene00017703	Uncharacterized protein	2.97977	-1.32341	-1.52407	-1.07093	1.09988	-1.15921	-2.20585	3.32832	1.75312	1.34886	1.1452	1.65426	1.89047	1.53998	0.611788	3.32832	1.75312	1.34886	1.1452	1.65426	1.89047	1.53998	0.611788	11.2467	2.09398	1.45847	1.15128	2.10375	2.3049	2.05587	0.464985	582	109	88	60	121	121	84	22
Y54G2A.41	WBGene00044485	Uncharacterized protein	2.97826	1.48236	1.60308	2.44822	1.72936	-1.01983	1.72758	2.31584	0.741375	1.30927	1.42222	2.03311	1.53161	0.713049	1.53013	2.31584	0.741375	1.30927	1.42222	2.03311	1.53161	0.713049	1.53013	5.77447	0.599199	1.39934	1.59287	3.11078	1.62123	0.742135	1.69052	91	10	26	26	55	26	10	25
C08F11.13	WBGene00007460	Uncharacterized protein	2.97497	1.07532	1.43939	1.26676	-1.17112	2.6741	1.41979	6.09447	4.52159	4.62636	5.04704	4.86273	4.2937	5.94064	5.02726	6.09447	4.52159	4.62636	5.04704	4.86273	4.2937	5.94064	5.02726	47.1202	21.8439	23.9737	32.9389	29.7172	17.8595	63.597	30.9867	2467	1114	1424	1751	1721	1005	2601	1396
B0303.11	WBGene00015131	Uncharacterized amino-acid permease B0303.11	2.97389	1.12635	1.10947	1.07283	1.06057	1.05157	-1.1846	4.08198	2.50962	2.68128	2.6595	2.61105	2.59446	2.58217	2.26522	4.08198	2.50962	2.68128	2.6595	2.61105	2.59446	2.58217	2.26522	17.1397	4.32543	5.20957	5.08155	5.03981	4.35141	5.37119	3.38089	2203	557	777	657	716	568	542	396
pud-1.1	WBGene00017499	Protein Up-regulated in Daf-2(gf)	2.97037	-5.92854	-10.7752	-7.43046	-8.17933	-2.45151	-6.09678	8.54299	6.97234	4.40467	3.54269	4.07889	3.94036	5.67867	4.36429	8.54299	6.97234	4.40467	3.54269	4.07889	3.94036	5.67867	4.36429	423.315	127.428	20.2812	10.4658	16.0656	13.5656	52.9872	18.5083	8963	2704	499	223	376	292	880	358
maoc-1	WBGene00017123	MAO-C-like dehydratase domain	2.9682	-1.18765	1.1396	1.61452	1.09369	1.41864	1.07318	6.29409	4.7245	4.47639	4.91302	5.4156	4.8537	5.22901	4.8264	6.29409	4.7245	4.47639	4.91302	5.4156	4.8537	5.22901	4.8264	53.4568	25.6577	21.3666	29.9772	44.7595	27.4513	38.643	26.7286	2227	1071	1033	1256	2061	1162	1262	1017
mup-4	WBGene00003497	Transmembrane matrix receptor MUP-4	2.96724	1.04616	-1.04044	-1.32739	1.00225	-1.38376	-1.12065	4.30481	2.73569	2.80079	2.6785	2.3271	2.73893	2.2671	2.57136	4.30481	2.73569	2.80079	2.6785	2.3271	2.73893	2.2671	2.57136	19.1757	5.27651	5.64882	5.14129	4.01538	4.95954	4.14167	4.39278	5623	1551	1922	1517	1302	1478	953	1177
pud-1.2	WBGene00021236	Protein Up-regulated in Daf-2(gf)	2.96511	-5.9174	-10.7477	-7.4165	-8.16145	-2.43506	-6.08238	8.53772	6.96963	4.40467	3.54367	4.07889	3.94081	5.68567	4.36499	8.53772	6.96963	4.40467	3.54367	4.07889	3.94081	5.68567	4.36499	423.07	127.252	20.2812	10.466	16.0656	13.5656	53.1415	18.5083	8958	2700	499	223	376	292	883	358
lips-17	WBGene00019939	LIPaSe related	2.9638	-1.3015	-1.1267	-1.19519	-1.37045	-1.07461	-1.61659	3.16729	1.59985	1.21967	1.42775	1.3426	1.1452	1.49604	0.906891	3.16729	1.59985	1.21967	1.42775	1.3426	1.1452	1.49604	0.906891	10.2883	1.80095	1.26782	1.60364	1.50874	1.024	1.9605	0.780889	403	71	58	64	66	41	61	28
K02E11.5	WBGene00010514	Uncharacterized protein	2.96265	-1.17219	1.07376	1.2466	1.4328	1.36177	1.38507	2.36278	0.795885	0.566683	0.898563	1.11388	1.31472	1.24137	1.26584	2.36278	0.795885	0.566683	0.898563	1.11388	1.31472	1.24137	1.26584	5.99759	0.659101	0.486262	0.823546	1.16203	1.27336	1.50839	1.23029	107	12	10	15	23	23	21	20
Y54E10A.17	WBGene00021835	Uncharacterized protein	2.96054	-1.17981	-1.52915	-1.84891	-1.65902	-2.86155	-1.4987	6.66049	5.09463	4.85608	4.4819	4.20796	4.36429	3.57783	4.51092	6.66049	5.09463	4.85608	4.4819	4.20796	4.36429	3.57783	4.51092	69.6881	33.949	28.4584	21.7869	17.7789	19.005	11.5732	20.6218	1612	787	764	507	455	447	210	436
cnp-2	WBGene00012901	Calcineurin-interacting protein 2	2.95974	-1.03556	1.11713	-1.05604	1.09723	1.13439	-1.00301	2.68534	1.11987	1.06946	1.27967	1.0412	1.25373	1.30178	1.11554	2.68534	1.11987	1.06946	1.27967	1.0412	1.25373	1.30178	1.11554	7.66191	1.06014	1.04798	1.33635	1.05331	1.17777	1.63319	1.01761	783	109	125	138	119	123	131	95
C25F9.6	WBGene00007726	Uncharacterized protein	2.95821	1.09873	-1.01838	1.06997	1.27578	1.07939	1.06822	1.88022	0.315493	0.451333	0.289211	0.413063	0.666874	0.425716	0.410703	1.88022	0.315493	0.451333	0.289211	0.413063	0.666874	0.425716	0.410703	4.01483	0.223173	0.375163	0.223741	0.34821	0.517356	0.412557	0.292014	50	3	6	3	5	7	5	4
T04B2.7	WBGene00011425	Uncharacterized protein	2.95535	-1.19265	-1.33556	-1.49428	-1.40078	-1.54337	-1.42575	2.32261	0.759276	0.505109	0.34183	0.17982	0.273041	0.133196	0.247552	2.32261	0.759276	0.505109	0.34183	0.17982	0.273041	0.133196	0.247552	5.82035	0.619465	0.426171	0.264385	0.13918	0.181724	0.124314	0.170848	299	32	26	14	8	10	5	8
F21C10.7	WBGene00017657	Uncharacterized protein	2.95443	-1.2856	-1.31003	-1.33993	-1.3266	-1.22935	-1.26116	2.8479	1.28502	0.922575	0.895423	0.862866	0.877291	0.987126	0.950266	2.8479	1.28502	0.922575	0.895423	0.862866	0.877291	0.987126	0.950266	8.55673	1.28781	0.856979	0.818983	0.796654	0.73493	1.08926	0.825247	3086	466	359	298	318	270	308	272
Y32F6A.4	WBGene00012529	Uncharacterized protein	2.95273	1.71952	2.08607	1.67449	1.54648	2.58631	1.73212	4.90998	3.34794	4.12994	4.40872	4.09166	3.97693	4.71883	4.14047	4.90998	3.34794	4.12994	4.40872	4.09166	3.97693	4.71883	4.14047	25.5333	8.92041	16.407	20.5807	16.2506	13.8884	26.5326	15.4627	1850	648	1379	1500	1302	1022	1507	1024
C49A1.10	WBGene00008191	Uncharacterized protein	2.95219	-1.71926	-1.28019	-1.07355	-1.05249	-1.31943	-1.2233	4.4955	2.93371	2.15193	2.57736	2.83132	2.85991	2.5338	2.64294	4.4955	2.93371	2.15193	2.57736	2.83132	2.85991	2.5338	2.64294	21.135	6.33862	3.26389	4.75325	6.14424	5.4499	5.14876	4.68089	622	187	112	141	200	163	119	126
nep-20	WBGene00020293	NEPrilysin metallopeptidase family	2.95163	1.05185	1.05152	1.01752	1.0124	-1.00375	1.06941	1.61454	0.0530242	0.12595	0.1255	0.0780798	0.0708056	0.0476301	0.149838	1.61454	0.0530242	0.12595	0.1255	0.0780798	0.0708056	0.0476301	0.149838	3.08956	0.034322	0.103601	0.094028	0.062225	0.041984	0.043864	0.094027	360	4	14	12	9	5	4	10
ZK507.1	WBGene00013978	Putative serine/threonine-protein kinase ZK507.1	2.9508	1.06641	1.01807	1.01972	-1.11508	1.32658	1.23746	2.12885	0.567741	0.660505	0.593581	0.595915	0.410588	0.975451	0.875122	2.12885	0.567741	0.660505	0.593581	0.595915	0.410588	0.975451	0.875122	4.94285	0.426264	0.57923	0.491597	0.509503	0.297296	1.07564	0.732534	229	20	32	23	27	14	39	31
F22D6.15	WBGene00009056	Uncharacterized protein	2.94989	1.14119	1.29921	1.40883	1.78188	1.41378	1.12341	1.9341	0.373438	0.563974	0.751076	0.867935	1.20684	0.872993	0.541327	1.9341	0.373438	0.563974	0.751076	0.867935	1.20684	0.872993	0.541327	4.21205	0.267123	0.482942	0.660867	0.801791	1.1158	0.932814	0.408513	76	5	10	12	16	21	14	7
lec-9	WBGene00002272	Galectin	2.94593	1.0878	1.22746	-1.37733	-1.07298	-1.19151	-1.2864	8.462	6.90328	7.02469	7.19895	6.4414	6.80165	6.65048	6.53994	8.462	6.90328	7.02469	7.19895	6.4414	6.80165	6.65048	6.53994	395.562	121.298	132.483	152.5	94.3678	115.828	104.522	97.4907	7769	2388	3019	3013	2049	2311	1610	1750
Y54G2A.45	WBGene00044488	Uncharacterized protein	2.94414	1.86634	2.94566	-1.1759	1.20992	2.00415	1.017	4.62518	3.06734	3.96755	4.62593	2.83357	3.34224	4.07033	3.09166	4.62518	3.06734	3.96755	4.62593	2.83357	3.34224	4.07033	3.09166	22.2713	7.08167	14.5048	24.2948	6.15413	8.26334	16.4455	6.67987	777	246	583	871	245	289	455	221
spp-18	WBGene00005003	SaPosin-like Protein family	2.94356	-1.97668	-1.42725	-3.26916	1.36885	1.17133	-4.50236	4.95626	3.3987	2.41562	2.88546	1.68978	3.85166	3.62685	1.22802	4.95626	3.3987	2.41562	2.88546	1.68978	3.85166	3.62685	1.22802	26.2267	9.30882	4.10915	6.16273	2.17731	12.6056	12.0197	1.17648	465	166	85	110	44	228	167	20
C49A9.6	WBGene00016760	Uncharacterized protein	2.94296	1.3393	1.58533	1.23809	1.32711	1.44841	1.01327	3.75923	2.20196	2.62343	2.86674	2.51008	2.61025	2.73643	2.22098	3.75923	2.20196	2.62343	2.86674	2.51008	2.61025	2.73643	2.22098	14.2481	3.23796	4.95077	6.07754	4.69313	4.4285	6.03986	3.24418	717	164	289	308	261	227	239	150
C29F3.7	WBGene00007807	Uncharacterized protein	2.94253	-1.89083	-1.86178	-2.20226	-2.36763	-3.44922	-2.99261	6.51709	4.96003	4.04101	4.06334	3.82104	3.71658	3.17376	3.37863	6.51709	4.96003	4.04101	4.06334	3.82104	3.71658	3.17376	3.37863	62.3726	30.3982	15.3239	15.7621	13.389	11.2422	8.582	8.36321	4273	2088	1219	1085	1014	782	462	524
let-805	WBGene00002915	Uncharacterized protein	2.93931	1.22278	1.10103	-1.18	1.01747	-1.17196	-1.23915	3.86151	2.30603	2.59619	2.44488	2.06724	2.33101	2.0771	1.99667	3.86151	2.30603	2.59619	2.44488	2.06724	2.33101	2.0771	1.99667	15.0818	3.60328	4.85212	4.22793	3.22339	3.43942	3.48827	2.65789	7655	2050	2285	1907	1534	1962	1529	1506
ndg-4	WBGene00003577	Uncharacterized protein	2.93142	1.05418	1.19433	-1.28724	1.05116	-1.13021	-1.09823	5.45347	3.90187	3.97799	4.15807	3.53759	3.97386	3.72528	3.76669	5.45347	3.90187	3.97799	4.15807	3.53759	3.97386	3.72528	3.76669	32.863	13.8467	14.6471	17.0584	10.6216	13.8519	12.8155	11.4858	3142	1326	1624	1640	1122	1345	961	1003
K05F1.10	WBGene00019411	Uncharacterized protein	2.92974	2.8762	2.92887	1.73965	3.11234	2.736	1.36259	3.60784	2.05706	3.58123	3.6074	2.85586	3.69506	3.50913	2.50341	3.60784	2.05706	3.58123	3.6074	2.85586	3.69506	3.50913	2.50341	13.2002	2.81283	10.7775	10.9452	6.25072	11.0593	11.0272	4.1715	260	56	246	217	136	221	170	75
hgo-1	WBGene00001843	Homogentisate 1,2-dioxygenase	2.92632	1.49964	1.49537	1.01428	-1.16014	1.20563	1.32241	6.23052	4.68143	5.26605	5.26194	4.70188	4.46713	4.95122	5.0846	6.23052	4.68143	5.26605	5.26194	4.70188	4.46713	4.95122	5.0846	51.4666	24.8444	38.0308	38.808	26.1583	20.5773	31.5594	32.5712	3141	1519	2692	2382	1765	1276	1510	1816
T12B3.3	WBGene00020446	Uncharacterized protein	2.91766	-1.18273	-1.09548	-1.06161	-1.07532	1.19915	-1.19818	6.49603	4.95122	4.70909	4.81966	4.86496	4.84646	5.21323	4.69038	6.49603	4.95122	4.70909	4.81966	4.86496	4.84646	5.21323	4.69038	61.4125	30.099	25.3608	28.0173	29.7952	27.3279	38.2164	23.8647	3054	1500	1464	1402	1638	1381	1490	1085
C49A9.4	WBGene00016758	Uncharacterized protein	2.91285	1.5592	1.79339	1.21381	2.03222	1.52601	1.28344	2.99163	1.4492	2.09	2.29189	1.72874	2.47226	2.05896	1.80922	2.99163	1.4492	2.09	2.29189	1.72874	2.47226	2.05896	1.80922	9.37113	1.54896	3.08229	3.69435	2.27178	3.90387	3.42599	2.22099	576	96	220	229	155	244	166	125
math-41	WBGene00020360	MATH (meprin-associated Traf homology) domain containing	2.90293	1.04939	1.14882	1.16698	1.24327	1.15625	-1.0488	2.23697	0.699461	0.769005	0.899619	0.922243	1.0136	0.908915	0.630721	2.23697	0.699461	0.769005	0.899619	0.922243	1.0136	0.908915	0.630721	5.4283	0.56003	0.686234	0.825175	0.871798	0.870035	0.983892	0.482887	534	56	79	82	95	87	76	44
F42A10.7	WBGene00018343	Uncharacterized protein	2.89776	-1.40686	-1.74382	-1.64892	1.38297	-3.8244	-1.58024	7.28333	5.74839	5.25591	4.94615	5.02687	6.21617	3.81316	5.08825	7.28333	5.74839	5.25591	4.94615	5.02687	6.21617	3.81316	5.08825	122.655	54.5148	37.7269	30.8061	33.6378	77.2239	13.7211	32.6388	3212	1431	1147	812	974	2055	282	781
Y53G8AR.7	WBGene00021814	Uncharacterized protein	2.89736	1.90113	2.62924	1.48582	2.09076	2.40736	1.92132	3.20045	1.66571	2.59257	3.06036	2.23697	2.72974	2.93316	2.60781	3.20045	1.66571	2.59257	3.06036	2.23697	2.72974	2.93316	2.60781	10.4814	1.9323	4.84258	7.1105	3.73949	4.92306	7.09948	4.53517	758	132	408	515	298	362	404	301
ubc-24	WBGene00006719	UBiquitin Conjugating enzyme	2.89487	-1.08184	-1.06392	1.14571	-1.02348	-1.06242	-1.34097	2.11155	0.578054	0.464564	0.488663	0.774294	0.544571	0.490696	0.154782	2.11155	0.578054	0.464564	0.488663	0.774294	0.544571	0.490696	0.154782	4.88974	0.436197	0.3889	0.397239	0.691368	0.403997	0.480739	0.097627	110	10	11	9	18	10	9	2
acp-7	WBGene00022246	ACid Phosphatase family	2.89449	1.1577	1.05236	-1.1152	-1.08364	-1.11398	-1.38842	4.04185	2.50854	2.71979	2.58217	2.35123	2.39265	2.35282	2.0351	4.04185	2.50854	2.71979	2.58217	2.35123	2.39265	2.35282	2.0351	16.7662	4.3213	5.341	4.78002	4.10846	3.62804	4.48417	2.74899	988	256	366	284	268	218	208	148
cpna-1	WBGene00006495	Copine family protein 1	2.89421	-1.11277	-1.14911	-1.06979	-1.1259	1.12491	1.06189	4.09579	2.56262	2.40847	2.36211	2.46529	2.39154	2.73244	2.64926	4.09579	2.56262	2.40847	2.36211	2.46529	2.39154	2.73244	2.64926	17.2648	4.54666	4.08012	3.93903	4.51537	3.6257	6.02685	4.69512	2642	699	728	609	768	538	703	659
haf-4	WBGene00001814	HAlF transporter (PGP related)	2.89333	-1.05833	1.11695	-1.29984	-1.11281	-1.19447	1.09261	4.75084	3.21811	3.13632	3.37767	2.83978	3.06391	2.96173	3.34589	4.75084	3.21811	3.13632	3.37767	2.83978	3.06391	2.96173	3.34589	23.5529	8.03424	7.51405	9.19388	6.18208	6.5038	7.21005	8.14934	2399	822	894	949	695	674	576	755
ric-4	WBGene00004364	Synaptosomal-associated protein	2.88824	1.1712	1.13579	1.48244	1.08373	1.46762	1.12444	3.93516	2.40498	2.63296	2.58867	2.97295	2.52098	2.95846	2.57418	3.93516	2.40498	2.63296	2.58867	2.97295	2.52098	2.95846	2.57418	15.743	3.95261	4.98756	4.80992	6.87762	4.0654	7.19547	4.40165	485	121	177	147	230	126	176	129
Y38F2AR.10	WBGene00021428	Major sperm protein	2.88771	1.0425	1.22784	1.14055	-1.23474	1.09912	1.19338	3.00886	1.47894	1.53899	1.77505	1.66866	1.17473	1.61529	1.73399	3.00886	1.47894	1.53899	1.77505	1.66866	1.17473	1.61529	1.73399	9.45711	1.59398	1.79987	2.32215	2.13107	1.0697	2.20869	2.07695	244	42	54	61	61	28	45	49
Y47G6A.5	WBGene00021635	Tyrosine-protein kinase	2.88608	1.15461	1.12357	1.25025	1.09398	1.14135	1.19322	4.57233	3.04322	3.25063	3.21131	3.36544	3.1728	3.23395	3.29807	4.57233	3.04322	3.25063	3.21131	3.36544	3.1728	3.23395	3.29807	21.8194	6.93556	8.34068	7.96084	9.35407	7.20312	8.92477	7.89141	1756	559	779	644	832	589	562	581
lec-4	WBGene00002267	Galectin	2.88218	-1.17037	-1.01664	1.10253	-1.23555	-1.09554	1.03094	6.67327	5.1461	4.91915	5.12229	5.28692	4.84095	5.01446	5.19006	6.67327	5.1461	4.91915	5.12229	5.28692	4.84095	5.01446	5.19006	70.3198	35.1823	29.8523	34.9591	40.8946	27.2439	33.215	35.3028	2782	1395	1371	1391	1789	1095	1031	1276
C53B4.3	WBGene00008273	Uncharacterized protein	2.88145	1.41343	1.83696	1.64667	1.38064	1.96783	1.6241	3.54367	2.01687	2.51608	2.89419	2.73643	2.48221	2.99348	2.71652	3.54367	2.01687	2.51608	2.89419	2.73643	2.48221	2.99348	2.71652	12.6751	2.71258	4.50847	6.19178	5.63711	3.95133	7.36474	4.95531	735	158	304	361	362	233	335	263
M04C3.1	WBGene00010850	Uncharacterized protein	2.88006	1.26674	1.35319	1.39964	1.06676	1.70177	1.48938	3.94722	2.42112	2.76223	2.85748	2.90618	2.51436	3.18815	2.99583	3.94722	2.42112	2.76223	2.85748	2.90618	2.51436	3.18815	2.99583	15.8438	4.01148	5.51401	6.0496	6.49504	4.05039	8.63293	6.23317	2462	628	998	952	1123	641	1058	882
acbp-4	WBGene00018949	Acyl-Coenzyme A Binding Protein	2.87928	-1.27404	-1.13158	1.07152	1.30569	-1.42139	1.14784	2.61375	1.08805	0.738634	0.909701	1.1877	1.47286	0.580747	1.28696	2.61375	1.08805	0.738634	0.909701	1.1877	1.47286	0.580747	1.28696	7.24292	1.01918	0.653078	0.836011	1.26333	1.51616	0.587753	1.25717	149	21	16	18	29	32	10	24
C03H5.5	WBGene00015407	Uncharacterized protein	2.87737	1.17565	1.19147	1.10105	1.13572	1.10297	1.14406	2.69139	1.16664	1.4001	1.41938	1.30552	1.35025	1.30803	1.3608	2.69139	1.16664	1.4001	1.41938	1.30552	1.35025	1.30803	1.3608	7.69002	1.11973	1.55212	1.58309	1.44353	1.32576	1.64452	1.37867	593	87	139	123	123	104	100	98
pde-4	WBGene00020114	Phosphodiesterase	2.87698	-1.03819	-1.08938	1.01161	1.02142	1.05576	1.08402	4.12421	2.59966	2.54559	2.47616	2.61632	2.63023	2.67793	2.71604	4.12421	2.59966	2.54559	2.47616	2.61632	2.63023	2.67793	2.71604	17.5252	4.66654	4.64601	4.34998	5.06298	4.49544	5.77325	4.95081	1575	408	472	402	497	399	393	398
ugt-41	WBGene00017336	UDP-GlucuronosylTransferase	2.87468	-1.32224	-1.54084	1.14044	-2.34448	-1.77879	-1.35567	6.25981	4.73641	4.33342	4.11269	4.92599	3.50714	3.90551	4.29741	6.25981	4.73641	4.33342	4.11269	4.92599	3.50714	3.90551	4.29741	52.3638	25.852	19.2612	16.4213	31.0718	9.50432	14.6922	17.6658	3852	1906	1644	1215	2527	711	848	1187
T04F8.8	WBGene00011446	Uncharacterized protein	2.87128	1.02145	-1.19673	-1.04391	-1.48002	-1.41888	-1.20259	8.33871	6.81702	6.84764	6.55793	6.75502	6.2514	6.31227	6.55087	8.33871	6.81702	6.84764	6.55793	6.75502	6.2514	6.31227	6.55087	345.261	113.849	117.472	98.5829	117.604	79.1211	82.6879	98.0159	7919	2618	3128	2274	2988	1843	1490	2058
C49C8.5	WBGene00016769	Uncharacterized protein	2.86916	1.24609	1.36849	1.21973	1.552	1.55389	1.06213	5.34676	3.82614	4.14354	4.27872	4.11269	4.46027	4.46202	3.9131	5.34676	3.82614	4.14354	4.27872	4.11269	4.46027	4.46202	3.9131	31.0393	13.1205	16.5702	18.4841	16.4948	20.4885	22.0965	12.8483	1955	828	1211	1171	1148	1311	1091	739
C44B7.7	WBGene00016629	Uncharacterized protein	2.86405	1.01628	1.39911	1.02029	1.05188	-1.00981	-1.17619	4.42553	2.90747	2.93077	3.39198	2.93645	2.98044	2.89339	2.67335	4.42553	2.90747	2.93077	3.39198	2.93645	2.98044	2.89339	2.67335	20.3097	6.17791	6.30577	9.26214	6.67741	6.06614	6.92188	4.79552	535	163	193	246	195	163	143	116
F57F5.1	WBGene00010204	Uncharacterized protein	2.86315	1.99417	2.55766	-1.2472	1.43867	4.17501	1.44652	9.65841	8.14081	9.13659	9.49563	7.82212	8.66555	10.2026	8.67339	9.65841	8.14081	9.13659	9.49563	7.82212	8.66555	10.2026	8.67339	1017	283.673	587.117	686.832	233.291	386.067	1045.42	400.166	49865	13937	33399	33873	12644	19228	40188	17924
B0222.5	WBGene00015056	Uncharacterized protein	2.86157	-1.24451	-1.42621	-1.43065	-1.31164	-1.46101	-1.42382	4.42684	2.91004	2.59446	2.39785	2.39336	2.51866	2.36307	2.40027	4.42684	2.91004	2.59446	2.39785	2.39336	2.51866	2.36307	2.40027	20.3148	6.19348	4.84897	4.05774	4.25397	4.06121	4.51233	3.78187	1047	320	290	211	243	213	183	179
pxn-1	WBGene00004256	Peroxidasin homolog	2.86088	1.29696	1.56811	1.18053	1.5816	1.07438	1.74871	3.3754	1.85894	2.23407	2.50796	2.09837	2.52032	1.96243	2.66523	3.3754	1.85894	2.23407	2.50796	2.09837	2.52032	1.96243	2.66523	11.5505	2.33269	3.50351	4.47295	3.32802	4.06404	3.1304	4.76701	2070	419	729	806	659	740	440	781
W03C9.1	WBGene00012219	Uncharacterized protein	2.86003	1.10221	1.00592	1.16781	-1.16697	-1.01569	1.02529	1.98608	0.470052	0.610452	0.478574	0.693862	0.24729	0.447595	0.506087	1.98608	0.470052	0.610452	0.478574	0.693862	0.24729	0.447595	0.506087	4.42022	0.336388	0.530506	0.384754	0.605019	0.168277	0.436035	0.374239	156	12	22	14	24	6	13	13
glna-3	WBGene00009271	Putative glutaminase 3	2.85926	-1.01502	1.11641	1.00386	-1.01953	-1.27517	1.00333	3.80487	2.28922	2.26772	2.44809	2.29479	2.26132	1.93853	2.29402	3.80487	2.28922	2.26772	2.44809	2.29479	2.26132	1.93853	2.29402	14.6414	3.54321	3.60394	4.24341	3.91363	3.23655	3.07424	3.46823	1192	289	341	348	352	268	197	258
asah-1	WBGene00010769	Acid ceramidase	2.85919	3.24311	3.03467	1.58317	2.11311	4.62154	2.69184	6.61926	5.10366	6.80104	6.7052	5.76647	6.18302	7.31203	6.53225	6.61926	5.10366	6.80104	6.7052	5.76647	6.18302	7.31203	6.53225	67.2573	34.1038	114.12	108.936	58.0011	75.5423	159.564	96.5766	3692	1876	7267	6014	3519	4212	6866	4842
aagr-1	WBGene00017071	Acid Alpha Glucosidase Relate	2.85777	-1.704	-1.32699	-1.40434	1.04313	1.28994	-1.37407	5.75737	4.24248	3.47355	3.83432	3.75259	4.3034	4.60978	3.78403	5.75737	4.24248	3.47355	3.83432	3.75259	4.3034	4.60978	3.78403	38.8924	17.9554	9.86964	13.1139	12.6713	17.9864	24.6634	11.5986	5077	2349	1495	1722	1829	2385	2524	1383
pat-12	WBGene00003936	Protein pat-12	2.85577	1.11698	1.02702	-1.076	1.01837	1.01725	-1.07926	6.09741	4.58352	4.74313	4.62198	4.47784	4.60978	4.6082	4.47349	6.09741	4.58352	4.74313	4.62198	4.47784	4.60978	4.6082	4.47349	47.1613	22.9446	26.0644	24.1948	21.8724	22.8716	24.6299	20.0093	3533	1742	2228	1800	1786	1760	1458	1390
hdl-1	WBGene00001839	Probable aromatic-L-amino-acid decarboxylase	2.85556	-1.02585	1.01706	-1.03558	-1.0994	-1.02056	-1.08795	1.85842	0.344649	0.307835	0.369057	0.294206	0.207938	0.31529	0.22304	1.85842	0.344649	0.307835	0.369057	0.294206	0.207938	0.31529	0.22304	3.92714	0.245148	0.250132	0.281472	0.239472	0.140417	0.299501	0.154669	496	32	37	36	34	18	30	18
C44C10.9	WBGene00008089	Uncharacterized protein	2.85493	1.13585	1.23666	1.02163	1.25894	1.49203	1.06088	4.32551	2.81206	2.99583	3.11851	2.84293	3.14426	3.38934	2.89732	4.32551	2.81206	2.99583	3.11851	2.84293	3.14426	3.38934	2.89732	19.3524	5.62905	6.63211	7.3624	6.18594	7.04008	10.0704	5.72539	532	143	192	191	178	176	195	130
F10C1.8	WBGene00017327	Uncharacterized protein	2.85258	1.93981	1.65106	1.12565	1.89417	1.13084	1.12313	3.38854	1.87627	2.83218	2.59966	2.04703	2.79783	2.05366	2.04379	3.38854	1.87627	2.83218	2.59966	2.04703	2.79783	2.05366	2.04379	11.6451	2.3737	5.80738	4.8472	3.16294	5.21373	3.40851	2.76745	261	50	134	109	66	109	59	56
C49A9.2	WBGene00016756	Uncharacterized protein	2.85243	1.16063	1.41508	1.05165	1.16339	1.19381	1.26937	4.4999	2.9877	3.20262	3.48858	3.06036	3.20603	3.24328	3.33182	4.4999	2.9877	3.20262	3.48858	3.06036	3.20603	3.24328	3.33182	21.155	6.60822	7.9737	10.0202	7.41516	7.44543	8.98475	8.06724	1689	529	739	805	655	604	563	589
T19C4.5	WBGene00011839	Uncharacterized protein	2.85197	1.64853	1.47739	2.23853	1.05711	2.56239	1.61013	3.27232	1.76036	2.48154	2.32341	2.92291	1.84049	3.11785	2.44753	3.27232	1.76036	2.48154	2.32341	2.92291	1.84049	3.11785	2.44753	10.9129	2.11694	4.34931	3.80615	6.59242	2.22304	8.1494	3.95501	440	98	205	152	293	111	255	147
T28D9.9	WBGene00020898	Uncharacterized lin-8 family protein T28D9.9	2.8504	-1.25054	-1.13284	-1.00499	-1.06437	-1.07102	-1.14525	1.8874	0.376233	0.053686	0.196292	0.369057	0.286228	0.277249	0.180568	1.8874	0.376233	0.053686	0.196292	0.369057	0.286228	0.277249	0.180568	4.0452	0.269553	0.041762	0.146483	0.304964	0.192175	0.258781	0.117299	152	11	2	6	13	8	8	5
nep-2	WBGene00020230	Neprilysin-2	2.84913	1.08941	1.11072	-1.01101	1.23105	-1.10027	1.11102	3.32581	1.81529	1.93884	1.96678	1.79949	2.11517	1.67743	1.96718	3.32581	1.81529	1.93884	1.96678	1.79949	2.11517	1.67743	1.96718	11.2396	2.22624	2.67414	2.77072	2.45197	2.84113	2.34721	2.57191	1154	230	319	287	279	297	189	242
catp-5	WBGene00019493	Cation-transporting ATPase	2.84762	1.11069	1.06833	-1.28727	-1.01657	-1.13896	-1.08023	2.61706	1.1073	1.25876	1.20266	0.742991	1.0836	0.919587	0.99597	2.61706	1.1073	1.25876	1.20266	0.742991	1.0836	0.919587	0.99597	7.26005	1.04118	1.32754	1.21967	0.659587	0.953404	0.999753	0.878079	1191	172	255	202	122	160	132	135
pbo-5	WBGene00012857	Proton-gated ion channel subunit pbo-5	2.84661	-1.11858	1.12234	-1.14523	-1.20893	-1.07326	-1.30935	2.67793	1.16869	1.00702	1.3352	0.973051	0.894964	1.06669	0.77984	2.67793	1.16869	1.00702	1.3352	0.973051	0.894964	1.06669	0.77984	7.60842	1.12085	0.965126	1.42841	0.94613	0.750691	1.20672	0.631433	538	81	80	102	74	54	68	41
W01B6.5	WBGene00012172	Tyrosine-protein kinase	2.84292	1.15608	1.03048	1.03576	1.19307	1.2047	1.11447	1.67351	0.166137	0.375383	0.209455	0.216825	0.42081	0.434806	0.322498	1.67351	0.166137	0.375383	0.209455	0.216825	0.42081	0.434806	0.322498	3.30463	0.111986	0.306865	0.159236	0.165251	0.303865	0.423052	0.219526	248	9	27	12	14	24	25	16
T20D4.11	WBGene00020617	Uncharacterized protein	2.83854	2.6073	2.59733	2.7045	2.34884	3.35952	2.24429	3.46849	1.96334	3.34589	3.34037	3.3987	3.19529	3.71159	3.1296	3.46849	1.96334	3.34589	3.34037	3.3987	3.19529	3.71159	3.1296	12.1554	2.59878	9.02099	8.92198	9.63307	7.36191	12.7193	6.93966	339	73	292	251	297	209	278	177
Y71G12B.6	WBGene00022146	Uncharacterized protein	2.83482	-1.11758	-1.06044	-1.11061	-1.27234	-1.04194	-1.12646	5.91754	4.41428	4.2539	4.32962	4.26293	4.0668	4.35501	4.24248	5.91754	4.41428	4.2539	4.32962	4.26293	4.0668	4.35501	4.24248	42.319	20.234	18.1959	19.3045	18.6346	15.0008	20.2735	16.8213	1102	601	623	589	605	479	489	455
Y19D10B.6	WBGene00021235	Uncharacterized protein	2.83441	1.14772	1.25611	1.14067	1.04719	1.00577	-1.03469	2.16546	0.662414	0.861179	0.991382	0.852295	0.728932	0.670717	0.613222	2.16546	0.662414	0.861179	0.991382	0.852295	0.728932	0.670717	0.613222	5.104	0.524474	0.785671	0.938122	0.781757	0.580609	0.689384	0.465936	351	37	63	65	60	41	38	30
alh-6	WBGene00000112	ALdehyde deHydrogenase	2.83332	1.05217	-1.09138	-1.03441	1.03647	-1.08843	-1.00707	7.02543	5.52294	5.59631	5.39679	5.47414	5.57462	5.40069	5.51277	7.02543	5.52294	5.59631	5.39679	5.47414	5.57462	5.40069	5.51277	94.8713	46.0443	48.4358	43.0284	46.866	48.4661	43.5097	45.917	5738	2897	3370	2710	3115	2964	2037	2638
Y43F8B.9	WBGene00012819	Uncharacterized protein	2.83303	-1.21917	-1.32536	-1.37833	1.27153	-1.52342	-1.82139	3.2763	1.77396	1.48806	1.36757	1.31103	2.12053	1.16664	0.908915	3.2763	1.77396	1.48806	1.36757	1.31103	2.12053	1.16664	0.908915	10.9381	2.14902	1.70394	1.48973	1.45086	2.85905	1.37772	0.784373	171	34	31	24	26	46	17	12
unc-1	WBGene00006741	Protein unc-1	2.8288	1.30576	-1.02452	1.33757	1.10596	1.9146	1.23329	2.48112	0.980929	1.36582	0.945985	1.40055	1.12623	1.91797	1.28344	2.48112	0.980929	1.36582	0.945985	1.40055	1.12623	1.91797	1.28344	6.53638	0.880266	1.48661	0.882376	1.60597	1.00316	3.02287	1.25373	262	36	70	36	72	41	95	47
zip-9	WBGene00077761	bZIP transcription factor family	2.82476	-1.07641	-1.16948	-1.24829	-1.10166	1.20568	-1.32754	7.5257	6.02757	5.92134	5.8017	5.70761	5.88789	6.29741	5.61881	7.5257	6.02757	5.92134	5.8017	5.70761	5.88789	6.29741	5.61881	157.904	66.0745	61.1494	57.2368	55.7487	61.2617	81.8656	49.1337	5585	2235	2379	1982	2112	2104	2175	1563
dpy-4	WBGene00001066	DumPY: shorter than wild-type	2.82019	-1.80006	-1.64016	-1.31161	-1.3232	-1.31841	-1.58755	2.39641	0.900615	0.0525663	0.186776	0.509276	0.496582	0.501811	0.233811	2.39641	0.900615	0.0525663	0.186776	0.509276	0.496582	0.501811	0.233811	6.16338	0.776884	0.041196	0.137439	0.425515	0.360019	0.49332	0.1626	249	32	2	6	19	15	16	7
fbxa-69	WBGene00010018	F-box A protein	2.81953	1.09306	1.0149	1.38675	1.0237	1.30034	-1.31032	3.3569	1.86145	1.98982	1.88279	2.33315	1.89523	2.24033	1.47152	3.3569	1.86145	1.98982	1.88279	2.33315	1.89523	2.24033	1.47152	11.4198	2.33818	2.81365	2.58398	4.04784	2.3151	4.0344	1.56904	494	102	141	113	194	102	137	62
C26C6.9	WBGene00007743	Uncharacterized protein	2.81799	-1.06963	-1.0212	-1.37017	-1.14272	-1.3424	-1.46557	5.18534	3.69067	3.59356	3.66041	3.23632	3.4982	3.26586	3.13921	5.18534	3.69067	3.59356	3.66041	3.23632	3.4982	3.26586	3.13921	28.8049	11.9096	10.8931	11.3891	8.46807	9.4244	9.17982	7.00951	875	363	384	348	285	291	219	195
hif-1	WBGene00001851	HIF (Hypoxia Inducible Factor) homologa	2.81368	1.04309	-1.05513	-1.0613	-1.09996	-1.02625	-1.08709	6.85288	5.36042	5.42128	5.283	5.27459	5.22297	5.32303	5.23995	6.85288	5.36042	5.42128	5.283	5.27459	5.22297	5.32303	5.23995	81.565	40.783	42.7597	39.5395	40.4407	36.8888	41.3279	36.8904	7957	4025	4873	3900	3880	3681	3187	3309
ace-2	WBGene00000036	Carboxylic ester hydrolase	2.81329	-1.01039	-1.01166	-1.07623	-1.16377	-1.1126	1.05337	2.7795	1.28724	1.27233	1.27052	1.18125	1.06844	1.1333	1.36226	2.7795	1.28724	1.27233	1.27052	1.18125	1.06844	1.1333	1.36226	8.17997	1.29106	1.34744	1.3196	1.2525	0.932802	1.32552	1.37974	718	114	138	117	122	84	92	111
R12E2.7	WBGene00020033	Uncharacterized protein	2.81044	1.90858	1.57084	1.47703	1.47395	2.71808	1.31854	1.85472	0.363921	1.29642	1.01546	0.92662	0.923612	1.80651	0.762859	1.85472	0.363921	1.29642	1.01546	0.92662	0.923612	1.80651	0.762859	3.91369	0.258963	1.384	0.964676	0.877014	0.777333	2.69688	0.614059	46	3	19	12	12	10	25	7
F32A5.8	WBGene00017971	Uncharacterized protein	2.809	-1.1917	-1.19387	1.09891	-1.13369	1.11479	-1.06904	4.82187	3.33182	3.0788	3.07617	3.4679	3.15079	3.48858	3.2355	4.82187	3.33182	3.0788	3.07617	3.4679	3.15079	3.48858	3.2355	24.3923	8.77806	7.17823	7.19291	10.1441	7.07267	10.8779	7.51459	877	317	300	260	403	259	307	247
Y50E8A.1	WBGene00013046	Uncharacterized protein	2.80575	1.10829	1.71865	2.08604	-1.61883	1.76287	1.62783	3.70059	2.2122	2.36053	2.99348	3.27297	1.51725	3.03013	2.91515	3.70059	2.2122	2.36053	2.99348	3.27297	1.51725	3.03013	2.91515	13.8353	3.27942	3.93435	6.75906	8.68696	1.59338	7.61759	5.79297	168	40	56	83	117	20	73	65
B0252.3	WBGene00015088	Putative transporter B0252.3	2.79999	1.08749	1.17549	1.04932	1.19865	-1.05186	1.02248	4.64366	3.15824	3.27924	3.39151	3.22769	3.41965	3.0853	3.19031	4.64366	3.15824	3.27924	3.39151	3.22769	3.41965	3.0853	3.19031	22.4094	7.61951	8.55743	9.25421	8.4119	8.80242	7.94018	7.26802	1128	387	499	458	459	457	324	331
col-162	WBGene00000735	COLlagen	2.79843	-1.00835	1.01611	-1.02467	1.16603	-1.1518	1.29495	1.94469	0.460076	0.448081	0.483126	0.424914	0.68168	0.256184	0.832972	1.94469	0.460076	0.448081	0.483126	0.424914	0.68168	0.256184	0.832972	4.24606	0.328449	0.372417	0.389648	0.355654	0.52854	0.238761	0.68805	173	14	18	16	16	22	8	26
pkg-2	WBGene00015650	Protein Kinase, cGMP-dependent	2.79601	-1.09361	-1.40598	-1.08208	-1.34585	-1.23104	1.02847	6.68032	5.19695	5.06785	4.70537	5.08315	4.76844	4.89707	5.23744	6.68032	5.19695	5.06785	4.70537	5.08315	4.76844	4.89707	5.23744	70.6647	36.4498	32.6435	25.8737	34.9541	25.8208	30.4824	36.8423	3564	1860	1965	1351	1986	1341	1237	1720
flp-33	WBGene00011586	FMRF-Like Peptide	2.79077	1.47488	1.42607	1.60429	1.60136	1.2573	1.74799	1.75257	0.271908	0.832509	0.783951	0.953844	0.951202	0.602237	1.0776	1.75257	0.271908	0.832509	0.783951	0.953844	0.951202	0.602237	1.0776	3.54992	0.18835	0.757716	0.694507	0.917996	0.805135	0.612741	0.968625	44	3	11	9	13	10	6	11
bcat-1	WBGene00001149	Branched-chain-amino-acid aminotransferase, cytosolic	2.78507	-1.0571	-1.08093	-1.71275	-1.29069	-1.98561	-1.68947	7.08134	5.60363	5.52351	5.49136	4.82731	5.23549	4.61404	4.84705	7.08134	5.60363	5.52351	5.49136	4.82731	5.23549	4.61404	4.84705	100.204	48.7514	45.8857	45.875	28.8428	37.21	24.7255	27.1781	5807	2831	3085	2674	1848	2191	1124	1439
elo-6	WBGene00001244	Elongation of very long chain fatty acids protein 6	2.78429	-1.03774	1.02469	-1.403	-1.4027	-1.05007	-1.33314	8.6809	7.20359	7.15014	7.23877	6.71507	6.71538	7.1331	6.78875	8.6809	7.20359	7.15014	7.23877	6.71507	6.71538	7.1331	6.78875	489.784	149.796	144.76	156.783	114.518	109.89	143.323	114.398	18762	5750	6434	6041	4849	4276	4305	4003
osm-11	WBGene00003891	Uncharacterized protein	2.78275	1.07697	-1.34367	-1.12561	-1.30227	-1.01025	-1.22776	7.89438	6.41787	6.52485	5.9917	6.24716	6.03684	6.40315	6.12184	7.89438	6.41787	6.52485	5.9917	6.24716	6.03684	6.40315	6.12184	220.363	86.7655	94.1352	65.8644	82.4926	68.1099	87.8708	71.6493	5833	2301	2891	1754	2414	1832	1824	1733
F35F10.6	WBGene00018056	Uncharacterized protein	2.78247	1.55267	1.71923	1.65557	1.96827	1.04869	1.39249	2.11902	0.642654	1.27741	1.42442	1.36998	1.61958	0.711246	1.12032	2.11902	0.642654	1.27741	1.42442	1.36998	1.61958	0.711246	1.12032	4.90919	0.502498	1.35449	1.59629	1.55333	1.75734	0.740465	1.02317	152	16	49	50	53	55	18	29
C38C3.10	WBGene00045390	Uncharacterized protein	2.77978	1.43677	1.6747	1.66254	1.67583	2.07847	1.83032	1.62247	0.147492	0.670324	0.891399	0.880878	0.892364	1.20301	1.01959	1.62247	0.147492	0.670324	0.891399	0.880878	0.892364	1.20301	1.01959	3.11591	0.098221	0.590855	0.815413	0.816167	0.747541	1.4375	0.906809	46	2	10	12	14	12	17	12
F26G1.5	WBGene00017841	Uncharacterized protein	2.77938	1.48406	1.31478	1.22753	1.40858	1.04218	1.25211	1.96243	0.487673	1.05722	0.882494	0.783429	0.981916	0.547271	0.812035	1.96243	0.487673	1.05722	0.882494	0.783429	0.981916	0.547271	0.812035	4.32744	0.351876	1.0312	0.806748	0.701296	0.833832	0.543516	0.661787	122	10	34	23	22	24	12	18
smd-1	WBGene00004875	Non-coding transcript of protein-coding gene smd-1	2.77327	1.05075	1.19242	-1.55591	-2.40053	-1.64952	-1.74608	8.28385	6.81226	6.88368	7.06616	6.1745	5.54891	6.09021	6.00814	8.28385	6.81226	6.88368	7.06616	6.1745	5.54891	6.09021	6.00814	328.025	113.641	121.104	138.306	78.2804	47.5706	70.9236	66.2619	9253	3016	3776	3776	2378	1326	1574	1658
K03E5.2	WBGene00019361	Uncharacterized protein	2.77144	-1.28136	-1.15099	-1.09017	-1.29273	-1.23969	-1.1761	6.76705	5.29641	4.93874	5.09354	5.17186	4.92599	4.98644	5.0624	6.76705	5.29641	4.93874	5.09354	5.17186	4.92599	4.98644	5.0624	76.2419	39.042	30.2052	34.133	37.478	29.1715	32.4113	32.0067	778	409	400	371	411	315	276	308
srap-1	WBGene00011522	Serine Rich Adhesion Protein-like	2.77128	1.02574	1.017	-1.00172	1.11558	1.46766	1.05881	2.28702	0.816463	0.853129	0.840781	0.813989	0.974257	1.36998	0.898901	2.28702	0.816463	0.853129	0.840781	0.813989	0.974257	1.36998	0.898901	5.62557	0.681561	0.777513	0.758198	0.733596	0.827413	1.74215	0.769705	2658	349	458	391	416	427	650	343
[truncated: 12,147 more rows]

## Sheet: Sup3b
Supplementary file 3b Top 5% genes positively contributing to PC1
[truncated: 669 more rows]

[truncated: 11 more sheets: Sup3c, Sup3d, Sup3e, Sup3f, Sup3g, Sup3h, Sup3i, Sup3j, Sup3k, Sup3l, Sup3m]
